# Supplementary material for: Huntingtin recruits KIF1A to transport synaptic vesicle precursors along the mouse axon to support synaptic transmission and motor skill learning
Source: eLife. 2023 Jul 11;12:e81011. doi: 10.7554/eLife.81011 (PMC10365837; doi:10.7554/eLife.81011)
Supplement: Figure 1—figure supplement 1—source data 1. [file elife-81011-fig1-figsupp1-data1.xlsx]

## Sheet: Figure S1a-Numb antero vesicle
	Wild-type	HTT-SD	HTT-SA
	6.5	7.75	17.01
	8.49	10.75	7.27
	9.3	15.03	4.42
	11.72	6.21	12.5
	7.58	14.48	4.16
	0.88	7.46	10.03
	7.86	9.54	6.66
	6.76	8.04	10.63
	4.6	18.82	3.99
	6.61	7.82	16.35
	4.8	6.79	0
	9.68	12.82	8.77
	7.76	2.77	9.85
	15.31	8.44	7.29
	5.07	8.03	9.66
	9.75	14.76	7.1
	6.76	11.28	5.83
	8.75	2.57	6.49
	16.4	5.97	8.46
	8.82	5.32	0
	4.73	6.89	8.34
	3.92	8.04	8.54
	13.64	7.22	7.7
	8.33	3.66	9.01
	5.93	7.67	5.79
	0.85	9.62	7.01
	8.59	9.09	6.5
	5.93	8.79	14.2
	17.67	11.83	13.33
	1.48	4.84	11.55
	3.19	20.65	8.41
	20.79	11.88	2.46
	9.51	8.45	16.58
	8.19	7.92	15.97
	10.59	10.15	2.71
	8.91	4.57	9.44
	0.7	6.26	11.02
	8.02	5.44	13.66
	7.5	4.01	10.87
	11.7	5.76	6.1
	11.24	5.15	4.54
	4.69	1.53	4.13
	15.01	6.12	4.29
	6.3	3.86	10.57
	18.48	24.04	6.12
	13.45	22.5	13.03
	4.62	10.37	6.85
	15.32	8.62	9.69
	9.91	17.4	14.99
	20.21	8.2	7.13
	16.66	5.51	10.32
	9.38	5.84	1.9
	14.14	8	7.27
	18.82	14.49	13.34
	8.86	8.93	6.19
	7.82	4.13	5.56
	4.38	5.79	5.02
	13.88	4.91	9.4
	6.8	5.2	5.86
	2.32	12.54	9.63
	4.63	5.97	7.5
	10	9.34	7.05
	9.7	14.57	9.36
	4.89	10.9	5.19
	7.46	7.18	10.6
	4.77	6.96	17.85
	14.3	10.75	2.57
	14.96	3.98	4.4
	10.34	23.66	5.04
	3.02	5.92	9.96
	5.52	6.99	7.76
	13.4	17.52	10.37
	5.94	8.2	6.06
	6.89	16.42	7.05
	5.82	10.52	8.02
	9.07	11.62	4.51
	9.02	6.91	10.83
	5.23	11.5	11.93
	6.54	17.33	5.18
	4.04	16.04	8.55
	5.42	16.27	4.59
	11.74	21.69	7.5
	6.58	6.22	6.33
	5.77	6.6	8.75
	1.53	8.24	11.38
	11.05	17.8	2.42
	9.49	12.65	4.68
	6.94	4.1	9.76
	8.75	6.57	7.99
	4.94	4.49	6.83
	6.4	4.82	10.4
	4.81	4.75	19.82
	5.71	16.81	12.11
	7.58	12.85	6.82
	10.78	11.23	3.94
	18.35	13.33	4.9
	17.5	12.11	4.12
	3.65	9.57	9.37
	14.43	6.79	11.61
	7.37	11.92	11.09
	2.86	8.16	8.64
	4.27	9.2	9.61
	10.54	5.65	19.43
	2.99	6.89	10.29
	10.25	7.55	2.88
	14.74	17.49	7.41
	6.83	4.16	16.94
	22.23	15.47	14.08
	8.08	23.05	13.02
	9.46	11.2	4.94
	11.28	5.76	9.35
	9.77	12.49	1.78
	10.94	12.52	11.46
	17.29	12.58	8.42
	3.9	12.37	8.86
	9.84	16.27	10.55
	7.73	13.83	10.65
		11.08	7.73
		12.39	8.16
		12.53	6.27
		11.64	13.37
		15.02	11.56
		7.84	4.62
		5.57	15.34
		15.79	10.24
		9.96	12.69
		9.9	12.47
		17.44	6.65
		14.33	13.31
		9.9	7.75
		16.6	4.21
		9.46	12.64
		20.38
		18.26
		9.79
		4.15
		11.09
		14.16
		19
		10.54
		11.85
		13.9
		24.42
		13.79
		6.72
		14.04
		17.39
		4.06
		4.29
		10.91
		13.17
		13.91
		6.38
		12.21
		10.51
		13.59
