# Supplementary material for: Huntingtin recruits KIF1A to transport synaptic vesicle precursors along the mouse axon to support synaptic transmission and motor skill learning
Source: eLife. 2023 Jul 11;12:e81011. doi: 10.7554/eLife.81011 (PMC10365837; doi:10.7554/eLife.81011)
Supplement: Figure 1—figure supplement 1—source data 2. [file elife-81011-fig1-figsupp1-data2.xlsx]

## Sheet: Figure S1a-Numb retro vesicle
	Wild-type	HTT-SD	HTT-SA
	6.5	6.2	19.14
	4.85	3.07	5.45
	6.37	3.01	14.72
	1.47	6.21	7.5
	3.79	10.86	4.16
	5.27	16.79	8.92
	12.57	7.95	14.66
	5.63	3.45	13.29
	4.6	20.27	4.79
	6.06	8.43	14.99
	4.12	4.85	7.03
	4.84	14.96	11.69
	9.31	4.16	5.63
	5.1	9.84	13.11
	0	10.04	7.24
	7.8	6.33	11.83
	6.01	16.92	8.74
	7.5	3.85	5.19
	2.05	0	7.05
	3.55	4.26	4.01
	13.32	7.42	16.69
	1.24	4.47	7.76
	7.29	12.63	11.54
	8.9	2.75	10.51
	0.85	7.67	11.58
	4.29	9.62	8.18
	2.97	9.92	7.81
	5.89	8.79	13.11
	7.39	6.9	11.28
	12.76	9.67	14.43
	5.67	7.38	4.21
	11.55	3.96	4.92
	7.16	10.14	9.67
	4.54	7.92	7.26
	14	4.06	3.61
	4.92	1.83	7.55
	8.92	5.37	3.67
	17.5	11.96	12.29
	7.52	0	14.76
	12.85	4.8	10.98
	7.03	6.87	7.27
	10.01	1.53	6.19
	8.67	10.71	5.72
	13.86	9.01	5.29
	23.05	11.31	7.65
	6.47	12.5	11.58
	18.72	6.91	15.41
	6.61	6.15	5.65
	17.97	6.96	15.93
	11.11	3.51	4.76
	0	5.51	8.84
	4.71	4.38	9.51
	12.55	2	6.78
	9.6	7.8	18.34
	6.7	5.95	4.13
	2.92	5.16	4.17
	11.24	4.82	9.2
	6.8	8.59	9.4
	9.26	6.93	1.95
	5.79	17.36	9.63
	6.25	5.97	7.5
	7.05	12.39	5.64
	8.81	5.61	9.36
	16.41	3.12	9.52
	11.12	10.9	18.55
	9.54	7.18	9.52
	6.41	9.94	1.71
	14.94	13.28	6.15
	5.54	1.59	10.08
	6.9	6.76	7.97
	15.84	5.92	15.52
	7.92	4.99	9.08
	7.87	16.42	7.07
	14.98	8.2	5.87
	10.58	14.92	6.01
	14.03	8.41	4
	9.8	5.28	9.63
	0.65	5.93	14.52
	6.74	11.5	2.07
	3.25	13	12.35
	12.65	12.03	18.37
	10.96	7.12	7.5
	8.66	17.74	11.88
	9.18	8.29	11.32
	10.26	3.3	13.81
	9.49	12.35	9.7
	4.86	7.42	3.51
	7.5	15.46	15.18
	18.12	6.83	6.39
	5.49	6.57	4.55
	6.41	12.9	7.8
	14.84	2.89	8.37
	4.55	7.6	14.54
	12.09	10.09	14.25
	10.78	8.12	14.48
	18.35	12.72	11.37
	7	10.91	8.67
	4.56	9.42	3.5
	3.61	19.9	7.56
	2.95	7.98	9.37
	17.14	3.88	9.68
	4.27	11.92	20.48
	7.03	4.8	5.76
	10.46	11.04	7.68
	13.67	9.03	18.04
	9.82	10.07	14.15
	5.12	13.94	10.08
	12.13	15.9	11.12
	19.14	12.47	11.29
	8.08	5.52	7.51
	6.76	20.29	13.02
	11.28	6.03	11.52
	16.28	1.65	10.79
	14.59	16.65	1.78
	17.29	9.74	14.9
	11.69	7.19	15.44
	6.33	16.49	12.08
	6.33	14.24	10.55
		7.61	11.36
		9.69	7.73
		14.16	6.8
		5.69	3.92
		19.4	15.6
		13.51	6.5
		1.96	3.08
		5.57	13.42
		19.91	8.78
		12.68	16.32
		14.4	7.48
		15.85	8.31
		8.6	7.39
		8.66	7.75
		19.15	11.21
		6.62	5.75
		9.81
		9.83
		9.79
		7.62
		10.4
		12.14
		14.53
		7.73
		10.45
		8.34
		14.43
		6.53
		5.23
		14.04
		13.53
		15.18
		8.12
		8.58
		15.45
		5.12
		7.95
		3.19
		17.3
		11.83
		12.79
