# Supplementary material for: Huntingtin recruits KIF1A to transport synaptic vesicle precursors along the mouse axon to support synaptic transmission and motor skill learning
Source: eLife. 2023 Jul 11;12:e81011. doi: 10.7554/eLife.81011 (PMC10365837; doi:10.7554/eLife.81011)
Supplement: Figure 1—figure supplement 1—source data 3. [file elife-81011-fig1-figsupp1-data3.xlsx]

## Sheet: Figure S1a-Linear flow rate
	Wild-type	HTT-SD	HTT-SA
	20.47	23.78	61.45
	21.66	25.63	22.32
	25.2	34.12	29.98
	22.62	20.7	35.71
	18.58	43.48	14.26
	8.89	37.32	32.83
	31.31	29.71	34.37
	19.7	20.71	40.3
	14.48	64.73	14.84
	20.06	26.91	54.15
	14.16	20.07	10.11
	23.73	45.64	34.29
	26.6	11.09	27.73
	33.99	30.02	33.38
	8.9	29.48	29.67
	27.98	38.01	31.16
	20.23	45.14	24.19
	25.81	10.27	20.39
	31.65	11.96	27
	61.59	16.33	5.76
	13.26	23.7	40.64
	25.44	22.06	28.18
	25.68	31.3	31.94
	24.77	10.99	33.09
	22.82	25.6	28.19
	2.68	32.1	25.74
	21.05	31.43	24.19
	14.55	29.31	47.16
	39.23	32.9	42.8
	12.9	22.58	43.78
	23.39	51.21	22.82
	44.4	29.08	11.98
	32.78	30.45	46.98
	24.35	26.44	42.29
	24.9	25.74	10.6
	35.15	11.59	29.67
	9.06	19.71	27.27
	29.94	26.84	44.91
	42.24	8.03	42.9
	35.15	17.94	27.96
	42.5	19.47	19.5
	20.32	5.1	17.14
	45.64	26.54	16.79
	26.11	19.75	28.68
	58.58	63.23	23.21
	62.78	61.75	42.63
	19.31	29.99	35.82
	59.8	25.47	27.9
	30.14	44.14	53.31
	68.43	21.12	21.38
	50.67	18.38	33.7
	18.79	17.55	17.33
	35.67	18.68	24.52
	57.22	39.44	53.31
	32.68	25.82	18.56
	26.1	15.15	17.33
	13.32	18.02	23.31
	45.28	21.29	32.61
	24.21	19.65	14.8
	19.04	48.25	33.39
	18.28	19.93	26.01
	29.77	74.42	22.46
	30.4	26.19	32.45
	23.51	33.35	24.11
	40.46	42.76	47.99
	26.85	28.17	50.16
	43.49	31.61	7.69
	39.94	45.83	17.73
	43.95	12.16	24.6
	14.66	68.48	31.73
	21.81	23.22	37.87
	51.48	24.54	34.14
	24.22	67.17	22.45
	26.05	32.16	22.78
	34.96	62.26	24.97
	34.62	38.24	14.92
	39.89	36.46	35.86
	25.72	25.71	45.03
	14.12	45.14	13.58
	18.57	61.75	35.02
	15.93	57.17	35.38
	43.2	50.64	26.02
	30.22	79.41	29.79
	25.04	27.4	33.98
	17.12	21.13	42.89
	39.47	38.26	18.68
	34.9	54.87	14.57
	22.4	53.71	41.48
	30.31	20.03	25.46
	37.97	25.79	20.47
	22.19	29.74	32.41
	20.11	16.14	63.43
	34.71	22.75	61.29
	23.32	56.27	46.27
	80.65	43.6	30.9
	39.65	46.21	20.89
	67.52	48.82	15.44
	48.62	43.64	19.66
	14.78	35.25	33.4
	36.82	22.43	38.61
	20.48	46.76	53.1
	31.97	27.16	26.63
	15.69	38.77	31.47
	33.51	27.04	67.25
	22.21	31.62	42.27
	42.84	38.84	20.66
	46.83	66.32	31.77
	22.57	28.31	52.22
	66.61	46.36	40.71
	29.71	79.97	46.43
	30.74	33.32	27.11
	41.49	15.02	35.43
	45.71	51.52	6.33
	45.73	41.57	45.81
	63.62	38	40.16
	26.03	51.03	36.22
	30.92	56.32	37.61
	26.33	41.36	39
		38.35	27.57
		47.71	27.13
		35.73	18.95
		53.66	50.88
		52.52	33.91
		20.04	14.24
		20.31	51.9
		63.49	34.39
		40.23	50.48
		42.58	37.25
		61.23	26.09
		43.88	38.9
		34.27	27.64
		64.16	25.12
		30.36	35.11
		58.94
		54.3
		35.66
		20.15
		39.41
		48.66
		62.74
		34.31
		41.14
		42.58
		74.49
		39.73
		22.33
		51.15
		57.76
		88.61
		20.68
		21.86
		46.32
		36.3
		42.05
		18.62
		51.85
		40.21
		48.34
