# Supplementary material for: Huntingtin recruits KIF1A to transport synaptic vesicle precursors along the mouse axon to support synaptic transmission and motor skill learning
Source: eLife. 2023 Jul 11;12:e81011. doi: 10.7554/eLife.81011 (PMC10365837; doi:10.7554/eLife.81011)
Supplement: Figure 1—figure supplement 1—source data 4. [file elife-81011-fig1-figsupp1-data4.xlsx]

## Sheet: Figure S1b-VGLUT pHluorin
	Wild-type	HTT-SD	HTT-SA
	1.00142	1.08069	1.02428
	1.06682	0.917977	0.985742
	1.03667	0.940611	1.04329
	1.05313	0.927059	1.04638
	1.02377	1.05615	1.04182
	0.995622	1.03494	0.995765
	1.0353	0.962219	1.00068
	0.86577	1.16576	0.989279
	0.924089	1.01411
	0.959342	0.981332
	0.959733
