# Supplementary material for: Huntingtin recruits KIF1A to transport synaptic vesicle precursors along the mouse axon to support synaptic transmission and motor skill learning
Source: eLife. 2023 Jul 11;12:e81011. doi: 10.7554/eLife.81011 (PMC10365837; doi:10.7554/eLife.81011)
Supplement: Figure 1—source data 1. [file elife-81011-fig1-data1.xlsx]

## Sheet: Figure 1b-Anterograde velocity
	Wild-type	HTT-SD	HTT-SA
	2.77838	3.31649	4.25093
	0.558941	3.13607	1.66662
	0.926706	0.562961	3.7296
	1.00312	1.12668	4.03831
	0.280078	0.454188	2.98085
	0.171777	2.56802	3.48516
	1.01267	2.51663	3.7409
	1.74944	0.626299	3.37283
	0.625811	3.40732	3.41898
	0.270498	1.181	3.4637
	1.05608	1.72762	3.09819
	1.07223	0.427778	3.35077
	2.3422	3.40306	3.12486
	0.72	2.61615	3.20434
	0.276134	2.22014	3.47308
	2.09466	1.65155	3.87655
	0.128782	3.40495	3.54858
	0.334197	0.165185	3.77436
	0.534117	0.906202	3.26783
	4.20576	4.07244	2.58659
	4.16522	2.17633	3.97051
	3.70282	0.810576	0.564075
	3.01058	3.68219	0.696286
	3.39694	2.57212	1.90474
	1.46398	2.76724	0.584845
	3.41546	0.709794	0.521922
	1.25256	0.729245	0.114469
	3.38544	2.00459	0.553588
	1.02975	3.48846	0.569476
	1.31083	2.67321	3.07725
	0.972291	1.99094	2.97934
	2.20533	2.9978	2.20381
	0.462037	3.0125	3.04231
	1.52212	1.27899	3.31079
	3.31031	2.19576	4.00577
	2.13612	3.08117	1.05078
	0.401449	3.7659	2.9379
	3.54028	2.56766	0.991902
	1.40229	3.38462	3.40595
	0.942672	2.31682	3.79001
	1.2491	0.701457	2.75184
	0.906152	1.47014	0.726279
	2.27592	2.84995	0.769231
	0.666139	0.316025	4.23884
	2.50529	3.13034	1.31364
	2.81262	2.10562	0.934621
	2.95836	0.54857	1.36375
	3.19357	3.06205	0.866446
	2.75433	2.14664	1.07385
	3.99512	2.22255	2.35471
	3.33355	2.06928	3.1767
	0.464841	2.53914	2.84042
	2.29959	1.07382	1.19748
	0.621034	0.309166	1.9329
	0.987817	0.0924502	1.74282
	2.11748	0.771154	1.41715
	0.44544	0.334087	1.18348
	1.80313	3.40823	3.30406
	0.257276	3.74132	1.94214
	0.774283	2.90882	0.540865
	2.24559	0.274945	0.386092
	3.28301	0.171954	0.181815
	3.32825	0.767037	3.21338
	2.06042	0.228659	2.68746
	2.17813	0.801104	2.72587
	0.203292	2.65782	2.35541
	0.517408	3.34002	2.36262
	0.223089	3.57857	0.209209
	1.46115	2.79765	0.161232
	2.17079	2.89239	1.01263
	2.33367	3.18939	2.13639
	1.35384	3.40891	1.13165
	0.244029	2.55701	2.77526
	3.52042	1.77506	3.70038
	1.10954	2.33798	0.0973318
	0.765464	1.81252	1.28006
	0.92339	2.94301	0.280709
	2.42608	2.05538	2.50893
	1.32318	3.43366	3.3215
	0.653825	2.87325	1.67067
	0.376644	1.62835	1.31368
	0.653825	2.10875	3.34723
	1.3259	2.79632	3.78526
	0.441528	2.82098	3.98851
	3.56679	2.74522	0.132596
	0.415161	0.149117	1.48048
	1.5822	1.18962	2.46736
	1.1261	0.0790204	0.749001
	1.39104	2.45664	0.408921
	1.51388	2.53554	0.105092
	2.26564	0.0860895	1.2833
	1.33248	0.457429	0.938258
	0.787175	0.393609	1.84041
	0.394428	2.09458	0.941043
	0.275997	1.55947	2.85322
	0.542001	0.171688	2.05593
	2.98417	2.43846	3.13736
	1.77856	0.725742	2.80263
	1.47233	0.928089	3.81437
	2.89793	2.48309	2.73802
	3.22364	2.86566	3.13126
	2.79451	1.5035	3.83297
	0.555352	0.401394	4.11193
	0.411319	2.56771	4.02508
	1.38639	1.35882	3.67143
	0.939411	0.529392	2.75357
	0.31716	1.44482	0.45716
	2.59123	2.72051	0.969569
	0.629344	0.410584	0.998352
	0.951996	0.171678	2.21605
	1.49713	1.14737	0.361946
	1.05768	2.12164	0.228459
	0.196382	1.78874	0.667857
	1.1256	3.59804	1.02774
	2.29429	0.615283	0.0854914
	1.41815	3.69668	2.15572
	0.616626	1.66594	1.05476
	2.16497	2.62402	2.65172
	1.89292	2.74628	1.04159
	1.69224	0.547698	3.50202
	0.78878	0.182059	2.65303
	1.34781	0.428956	1.23067
	0.818334	0.419189	0.366209
	2.16597	2.71782	2.575
	0.985904	3.16081	1.41619
	2.11335	0.392595	2.35443
	0.444608	1.68364	3.87412
	2.30584	3.44764	2.92208
	1.34554	3.86518	2.78736
	2.12593	1.72489	0.676683
	3.34663	0.235796	0.171163
	3.6363	4.35433	1.54108
	1.02974	1.6263	1.74946
	1.86227	0.28108	2.82038
	2.70992	4.11546	0.242435
	1.26851	2.3149	3.10965
	0.293393	4.16681	2.7051
	0.915278	3.89984	3.43504
	1.64282	3.0578	1.70429
	1.94081	3.94271	3.41941
	3.54029	2.91165	0.775799
	3.90147	2.4148	3.57334
	2.59659	0.919518	3.54222
	2.96221	3.64457	0.206387
	2.67641	2.96013	2.85759
	3.2379	2.34274	2.92865
	3.61799	1.12184	1.5719
	0.216643	2.74277	0.758398
	2.01523	2.05709	0.616785
	1.91843	3.26438	0.111815
	2.64808	2.28234	1.21565
	2.83027	0.57957	0.994482
	0.243011	0.356904	0.495724
	0.292561	2.00269	0.513986
	3.34162	1.18816	1.86205
	3.1621	0.55574	3.2266
	3.05099	2.20073	2.18656
	0.465351	1.5873	2.58077
	2.49853	0.703372	0.113941
	1.05117	2.06916	4.06503
	2.71241	0.66319	3.43833
	1.31464	1.07248	1.4917
	0.356538	1.29794	0.771119
	0.876088	1.56091	1.28816
	3.30761	1.54908	1.60457
	1.34142	1.23987	3.11519
	0.128157	4.1213	1.20244
	2.37237	0.295282	2.14757
	2.68429	0.865471	1.46005
	4.01646	0.904589	0.48173
	0.569094	2.35323	1.36409
	0.914692	2.0484	0.620456
	3.08407	1.43112	0.196429
	3.07722	0.295053	0.451411
	2.64676	1.11581	0.549828
	2.29615	3.67333	0.938724
	0.337456	0.307131	1.92957
	0.964602	1.44329	1.5166
	2.30703	1.08335	0.378254
	0.430858	2.01359	1.20178
	0.501479	1.25388	1.97273
	0.755942	0.978205	0.964112
	0.477538	0.41117	0.892137
	0.141685	0.346562	2.09073
	1.52641	1.5802	1.33056
	3.9791	2.36604	1.52901
	2.18933	0.153222	0.95809
	0.754404	3.00921	1.45657
	2.37926	2.45305	3.94
	2.95641	0.34329	3.68838
	2.86456	1.48017	3.533
	3.35152	1.36128	0.251844
	3.27185	1.02906	0.157992
	1.14468	1.81238	3.37765
	0.309374	1.10699	1.34627
	3.59913	1.39122	3.60012
	0.400111	0.29573	0.272074
	4.34101	2.11346	2.85385
	2.67236	1.74915	3.80527
	2.25166	0.689492	2.93549
	0.541509	0.849377	2.63165
	0.230725	0.70541	2.31178
	1.16878	2.67028	3.22132
	3.76154	0.0791382	3.64817
	0.689848	0.753659	2.22549
	1.70344	0.537669	0.205094
	1.89985	0.171678	0.257745
	1.86479	0.205326	0.807967
	0.171468	3.35596	1.66346
	0.469523	2.83269	1.87335
	2.58216	3.01662	2.77301
	1.68341	1.65308	0.139199
	1.02622	3.14099	2.09898
	0.919651	1.12075	1.0483
	0.748572	0.971248	2.29209
	0.977289	0.511799	2.21888
	2.57723	2.68699	2.42531
	1.6115	1.9484	3.33306
	2.45958	0.13371	0.942318
	2.09367	1.77315	0.144644
	2.25362	3.73069	1.91154
	2.00236	1.50335	3.74586
	1.05927	2.3522	3.34363
	1.9517	1.58226	0.410172
	0.882796	0.93549	3.08636
	0.265229	1.08517	0.733986
	2.30067	0.71669	0.406724
	0.355794	0.336688	0.932332
	2.73798	1.43577	2.22004
	0.551664	2.82997	1.73606
	0.472497	0.471149	0.256987
	0.859785	3.33904	2.51098
	2.49521	2.32006	1.35152
	2.56865	0.367071	3.21911
	3.34549	2.387	0.574279
	4.00569	2.58368	0.191413
	4.06336	1.02906	1.73269
	3.05	0.512219	3.64541
	2.82615	2.9472	2.57163
	3.34064	2.43424	2.30508
	3.0882	1.15574	3.52428
	2.67046	3.3551	3.65351
	1.54408	1.66379	2.8537
	2.02449	1.02424	2.59683
	1.85369	0.366398	2.47432
	1.67894	0.338842	3.44596
	2.92178	1.97872	1.37152
	3.04149	0.335023	1.19338
	2.22431	2.97638	0.732181
	1.56988	0.136486	2.03438
	0.3073	2.07287	0.309781
	1.71572	2.36269	2.34019
	1.37258	0.599059	1.76566
	3.16548	3.15487	1.96102
	3.15692	4.28645	2.46049
	2.11946	3.60068	1.22234
	2.33333	4.0717	0.869831
	1.21368	3.87925	0.543798
	2.05889	2.68618	2.44454
	0.469287	2.98506	2.49814
	0.478141	3.35	2.41304
	0.948403	0.500815	0.514103
	0.911104	2.93495	3.46489
	2.47752	0.312583	3.00256
	2.07792	2.68153	3.57419
	0.646593	0.866524	2.67753
	0.308521	3.0071	0.228815
	2.82154	1.86561	4.00464
	0.312938	1.38284	1.4995
	3.0017	3.40282	1.02979
	2.79989	0.114633	0.168628
	3.32771	1.62951	1.07341
	3.09001	2.47256	0.261583
	3.13478	3.3225	3.22016
	3.605	3.63609	3.42231
	2.42353	3.48692	3.40729
	1.25593	4.53308	2.07894
	2.31337	1.49122	3.25607
	0.0833162	2.86175	3.96741
	0.623033	2.52012	2.50889
	0.566267	3.53003	3.12983
	2.95033	3.05847	2.81333
	0.480263	3.19834	3.77396
	3.04497	3.80119	0.125077
	1.9687	3.74633	1.45122
	4.3093	3.50282	3.55261
	1.54806	3.09073	4.11703
	0.146695	1.17738	0.601202
	0.13573	2.47256	0.729952
	0.244868	2.06045	0.109258
	1.40266	0.798628	1.50165
	0.618049	2.66652	4.47508
	0.627088	2.07166	2.35941
	4.61801	2.91154	3.04487
	1.6611	1.82006	3.36124
	0.208497	2.64918	1.03756
	0.62366	0.751654	0.702569
	1.7873	0.806976	0.445249
	1.06044	1.28462	2.59692
	2.058	1.14183	2.06824
	3.57473	1.85436	0.208701
	1.12163	0.482603	2.19109
	1.40401	1.22335	1.02795
	2.85425	2.33811	2.23995
	0.864657	2.36079	2.34275
	0.205723	3.45038	0.594969
	2.39784	3.19271	1.78171
	0.626534	3.77781	0.745288
	2.40018	3.47212	2.13491
	3.4793	3.47496	1.25636
	1.4474	2.90385	3.85268
	2.24441	1.77704	0.180852
	2.30579	0.31716	4.0518
	2.60594	0.259685	1.94135
	3.43663	0.458488	3.2761
	4.45746	0.460179	2.42229
	0.564105	1.73206	0.747601
	1.04021	3.09449	2.56702
	0.0858087	2.41267	1.1312
	1.71757	2.49478	2.00237
	0.184296	0.454434	1.40793
	1.99303	2.51111	2.48726
	3.80603	1.29523	0.806419
	2.32503	0.959102	0.639863
	0.573041	0.805417	3.03374
	0.3194	2.05446	2.70801
	1.85677	2.10181	0.848466
	0.499708	2.37479	3.69693
	1.0111	1.89069	4.06056
	0.375563	0.643917	0.892539
	3.99594	0.128283	1.90649
	0.7525	1.12299	3.33052
	0.128146	2.62113	0.41344
	1.05055	2.04504	3.01113
	2.18326	2.30435	3.52527
	3.47284	0.13707	0.542682
	3.34278	0.480999	0.821742
	3.16234	1.70416	4.18177
	3.97353	0.319915	3.30377
	2.23205	0.414523	4.12
	2.3129	1.32049	3.50192
	2.96419	1.21297	2.47411
	0.504499	3.08615	0.0841845
	2.68627	2.9578	2.55307
	0.707504	2.73711	2.2462
	1.26811	4.14251	3.25263
	0.534584	3.68345	2.53276
	0.407157	4.11519	1.26103
	0.457977	3.81945	1.9717
	0.206037	3.04909	0.547065
	1.28461	4.15592	2.96878
	2.68391	2.58059	1.9864
	3.85092	3.67236	3.96154
	1.90511	0.381347	0.229162
	0.545668	0.142573	2.96559
	2.55301	0.201935	3.34587
	3.37892	2.97286	4.8533
	3.04192	0.240525	0.204868
	3.9167	0.477201	0.202017
	3.67181	0.480154	1.83024
	1.66875	1.65132	0.661058
	1.74373	1.15727	2.12758
	1.38695	4.26309	0.194043
	3.45945	3.29643	3.39707
	2.49828	0.480546	3.14395
	2.62182	3.66916	2.17217
	2.60825	0.961628	0.171303
	3.50023	0.375175	1.8608
	3.78807	2.21331	0.186104
	4.63435	1.16222	0.293737
	3.25471	1.2107	0.811464
	3.61407	3.17533	3.46941
	2.16279	4.16874	1.52138
	3.40524	3.41772	0.587799
	0.0932853	0.390139	0.833002
	2.2097	1.26603	1.38296
	2.41329	1.95332	1.2232
	4.21604	1.12255	2.35769
	2.37284	1.13005	0.480454
	0.46148	3.5438	0.406088
	1.27143	0.266116	3.25657
	3.10966	2.09396	2.41968
	2.56416	2.88399	0.506126
	0.629316	0.0976899	2.35677
	0.249863	0.952747	0.38988
	2.95164	3.59107	0.418889
	2.91914	0.250283	1.5771
	0.647216	3.38077	1.0678
	0.166308	1.22726	3.25131
	3.06026	1.0625	2.66653
	2.00932	0.514935	2.7207
	2.73224	1.54195	3.63326
	3.53137	0.1837	3.25308
	2.219	3.13659	0.721284
	1.69365	2.86364	0.827182
	3.83269	3.08387	0.464578
	3.37555	3.46265	2.62262
	3.61798	3.46935	2.58835
	1.20272	3.70067	3.13125
	1.63507	2.0137	0.350393
	3.32759	4.98558	1.75677
	2.93375	3.67132	2.14466
	2.49994	3.97928	1.30298
	2.92126	0.702	0.644608
	1.2061	1.34275	2.59259
	3.30879	1.02582	3.02945
	0.345012	2.12444	1.02945
	2.47821	0.19523	3.9192
	5.04503	2.8526	3.4379
	1.15548	2.06653	3.05526
	3.16386	2.52022	1.79079
	3.83077	0.794741	0.85765
	3.37152	0.492271	3.37152
	1.2477	3.83538	5.23526
	1.50433	3.91974	3.29556
	2.45531	2.3606	3.23974
	1.13402	2.72571	0.229101
	0.601065	2.57096	0.0989243
	3.86301	3.27291	2.64428
	2.31029	0.478311	3.71538
	0.718128	0.580857	3.60181
	4.33119	2.98329	2.33613
	2.20987	1.18666	3.67108
	3.67278	2.93794	1.45279
	4.18319	1.34384	3.06012
	3.0804	0.753923	4.08419
	3.50823	1.44558	1.18354
	3.04496	2.279	0.167852
	0.417141	0.471113	2.60128
	3.68008	1.43271	4.11626
	3.50498	1.96458	3.14286
	4.07817	2.44225	2.74423
	3.09126	2.53407	0.433389
	3.74957	1.02336	2.91196
	3.32482	2.08876	1.44858
	0.687883	0.146183	4.32687
	0.884854	4.11341	3.17831
	2.45892	0.83703	3.99649
	0.71745	4.49904	3.20198
	0.820408	3.69266	1.28718
	0.285501	0.333159	0.575065
	0.436253	2.72206	0.257924
	2.92549	0.904849	2.86922
	0.995949	2.73018	3.82865
	3.00754	2.3118	2.8497
	1.62173	2.73431	3.55314
	2.02959	2.92261	3.21694
	0.116069	1.79845	2.88713
	1.29004	2.64533	3.92764
	0.507681	0.417695	5.04066
	1.29549	1.39186	4.5196
	0.388641	1.66248	0.344739
	2.04455	2.0321	3.94979
	1.51651	2.74341	3.83226
	3.29585	0.888462	3.24308
	2.02506	0.736594	4.40083
	2.85696	0.171842	0.812854
	3.41346	0.445799	0.371023
	3.47535	2.66054	0.745285
	2.03971	2.45265	0.97109
	4.2655	3.30613	0.884208
	1.46301	3.25206	1.10673
	1.82447	0.114817	0.714243
	1.68729	1.35396	1.8982
	1.36166	2.25723	0.0809852
	4.38926	1.12457	1.25016
	0.844443	0.583171	0.272458
	2.6474	2.13891	1.68398
	0.205251	1.69792	0.565947
	1.05685	2.9012	0.435692
	2.11655	3.34029	2.78202
	0.989871	1.24267	3.02513
	1.51541	2.78513	3.53582
	2.66098	2.86394	0.723443
	1.87018	0.519304	0.115973
	0.62679	0.400549	0.248134
	0.564702	0.741717	2.36972
	0.342966	0.444448	1.57598
	3.98893	1.46841	1.86021
	2.32091	2.51409	0.872298
	3.53582	3.07152	0.349704
	0.994844	2.52124	0.733187
	0.175246	3.42324	1.03138
	1.58698	3.0164	3.30013
	0.585054	1.6116	3.78124
	0.918069	3.0206	0.426059
	1.38469	4.00848	1.40341
	0.722515	3.67731	3.30939
	3.08397	2.91447	3.78399
	2.31385	2.43998	3.63666
	1.91325	2.94872	1.80243
	3.50355	2.1576	3.8002
	2.1679	2.41505	3.71463
	3.06173	3.3655	2.46141
	4.138	2.36951	0.260829
	2.78516	1.18258	1.44192
	1.97457	4.175	0.558398
	1.9851	0.771847	0.605206
	3.25636	0.324421	3.87122
	4.15398	3.22006	3.42308
	3.56785	0.191204	2.59475
	1.29385	3.82066	0.557376
	3.26798	2.85265	1.03719
	0.886768	3.76816	0.832748
	0.829428	3.31661	0.187583
	0.689983	3.21706	3.55256
	0.3112	3.85385	1.61425
	0.290028	4.36763	0.652485
	0.0859834	3.15593	3.71563
	0.757903	2.47159	0.447434
	1.05149	2.06204	0.655717
	3.21659	2.68575	0.669366
	0.349063	0.434989	0.137986
	0.878218	3.2474	3.72372
	3.33825	2.9108	0.873907
	4.26966	0.108399	1.92608
	3.11037	3.36077	2.25925
	1.86188	1.9942	3.07818
	0.43249	0.128836	3.62555
	0.535064	2.79534	3.23361
	3.15667	0.25795	0.308329
	0.882201	2.19765	1.33136
	0.720721	2.23365	2.32854
	0.267437	2.87184	3.1179
	1.09467	2.16492	2.29046
	1.57537	3.76552	2.45799
	0.96776	2.90484	0.127008
	0.811552	0.472149	2.49321
	3.20648	0.434814	1.02994
	0.142967	3.67779	1.0457
	0.222371	3.62979	2.83741
	1.3491	3.8319	1.4556
	1.69299	4.38052	0.539079
	1.77161	3.45313	0.319889
	0.214636	3.22261	3.15959
	1.20348	4.02321	0.900378
	1.59055	3.7546	0.350208
	2.48671	2.0881	4.26904
	3.59066	3.15769	3.02146
	2.77365	1.17645	0.799455
	2.07633	2.62906	4.78012
	3.91218	0.171804	0.411558
	1.92659	1.13822	1.08827
	2.01622	0.766174	2.0716
	2.33739	4.08303	0.704498
	1.87366	3.60663	3.66498
	0.461944	3.81749	1.05991
	1.45419	2.99785	0.489298
	1.35594	2.17818	1.91337
	0.82792	0.433224	3.78158
	3.45532	1.17152	0.428943
	3.93108	0.431823	2.46346
	4.86767	1.35611	0.104617
	2.77084	0.993667	3.1933
	3.0875	0.499418	1.97224
	1.24071	1.39272	3.33382
	2.09367	1.45658	0.515447
	2.5729	2.8863	0.933058
	1.98019	0.542418	1.98254
	0.594595	3.74577	3.09274
	2.22308	1.16406	0.920101
	1.37164	0.510523	1.28478
	3.74248	1.60349	0.65637
	0.21298	1.60863	2.01462
	0.277646	1.80309	0.171403
	0.431079	0.484615	1.3431
	0.502123	1.52162	2.8236
	0.23427	3.48819	0.363654
	1.73774	3.03361	2.26238
	1.12632	2.81547	2.75857
	0.401822	2.72227	3.90538
	0.89056	3.0721	2.8091
	1.9472	2.92324	2.6472
	0.112927	2.86625	3.37467
	1.83244	0.938736	1.16801
	0.642709	2.43946	1.14583
	2.69084	3.42048	3.75713
	0.442104	2.39687	0.18772
	2.85174	3.84291	0.16857
	3.18952	1.01141	2.51044
	3.92575	3.58428	2.73934
	0.324859	2.98893	1.03301
	1.58669	2.99124	3.99191
	2.38357	3.30385	4.21989
	2.66572	2.24647	1.07818
	0.253562	3.15971	2.6586
	2.80798	3.87751	4.08683
	1.3185	3.06048	0.684578
	1.41571	0.920058	3.77786
	1.31042	0.819429	2.95268
	3.15977	0.969182	3.53714
	0.413957	4.37234	0.380671
	2.67096	3.35313	1.65376
	3.32633	3.16548	3.52024
	3.68636	2.41376	1.64489
	1.34025	5.14389	4.06923
	2.59515	3.24712	1.35395
	2.26513	3.08622	1.02897
	0.176031	2.00816	0.245382
	0.535927	0.997766	0.670052
	0.373119	2.08662	1.16059
	1.54286	2.75723	2.28265
	1.38557	2.7971	4.43883
	0.435852	2.97079	3.54156
	0.654313	3.87126	3.53308
	0.929487	2.8614	2.26558
	0.784432	2.54238	0.140181
	3.1127	1.5213	3.96219
	4.10551	1.10896	1.78095
	4.83864	2.92294	0.408669
	3.84389	3.57149	5.23494
	3.56789	3.25723	2.38238
	4.46142	3.25723	5.39302
	1.77654	1.99214	5.05953
	2.88666	1.18833	2.91286
	1.85556	2.03209	2.48574
	3.0967	1.34665	3.74476
	0.169109	0.573584	4.0456
	0.897868	3.96842	2.22175
	0.673662	0.603412	0.504727
	2.43108	0.85707	0.762887
	3.47832	1.1384	3.82714
	2.47788	2.95487	3.43462
	1.61426	2.19038	1.58521
	0.372905	1.93269	0.955775
	1.49138	4.19839	0.857476
	3.47573	4.07195	3.4515
	3.35987	3.26516	0.82543
	0.396683	4.02465	0.660334
	3.46044	3.70641	2.47292
	0.639292	3.52995	1.96167
	1.33087	3.17039	1.89277
	1.28717	3.68648	0.500957
	0.228451	3.18477	0.57064
	1.12018	3.00947	3.8943
	0.260591	0.523079	2.94885
	0.889385	0.523777	0.749169
	3.26604	0.647359	3.70614
	0.565818	1.24344	2.51873
	0.525346	1.38853	2.50689
	1.92277	0.238749	4.16917
	0.594169	3.34602	1.70299
	2.12518	1.72651	2.48309
	0.102843	1.28705	3.05517
	0.720288	2.08853	2.57551
	2.28201	0.924606	2.91691
	1.37641	0.227924	3.58068
	1.73701	1.09155	0.683931
	0.196232	2.66519	0.671935
	1.83124	2.9262	1.06996
	3.19574	3.24195	0.346445
	3.08554	4.00047	0.48968
	1.63854	2.43946	1.35755
	3.59977	4.72046	2.66513
	0.687613	4.71839	3.38149
	0.198056	3.47051	0.329532
	3.67326	2.16662	0.299551
	0.216508	3.76624	1.91392
	0.824779	3.89231	1.19677
	2.07157	2.09438	0.680525
	3.05044	0.0881	3.12716
	3.76553	0.683981	3.46407
	3.52561	4.10865	4.08418
	2.89285	0.667371	0.836373
	0.399683	1.07724	2.35066
	1.15045	2.57655	1.7241
	1.68838	3.43536	3.95533
	1.28819	3.48586	3.62741
	2.24308	1.04031	2.60518
	0.289079	0.393449	2.89717
	0.247076	0.689017	3.52734
	1.74632	0.341616	2.60053
	2.83933	0.184237	0.885302
	0.323105	0.901803	0.243231
	2.34164	3.12815	1.02708
	0.988363	3.47705	2.1117
	2.70185	1.91525	1.98917
	4.3819	0.856555	2.18103
	4.10983	1.62581	1.91255
	3.30577	0.717235	0.214233
	2.56868	0.296938	0.274757
	0.317755	0.487042	1.04605
	6.47308	4.6127	1.0616
	4.87121	4.00577	4.34177
	4.20056	3.75905	1.27719
	3.79558	4.97115	4.44378
	4.61598	4.8854	3.19734
	4.43525	4.09346	2.34712
	0.585117	4.51806	0.421019
	0.685212	3.7527	0.432561
	2.75506	4.44827	1.97313
	0.759013	4.28912	2.0271
	0.968353	0.530301	3.26215
	2.47823	1.6156	2.41938
	0.379589	2.39186	2.20344
	0.0980087	5.10821	0.280952
	0.143583	4.52538	0.149011
	0.593599	4.23276	0.309808
	2.275	0.333025	0.483702
	4.15859	0.729971	1.28125
	4.3773	0.143021	0.0874869
	3.55958	1.63143	2.37111
	3.87568	0.701944	3.24633
	0.802673	3.51008	1.84758
	1.19774	3.2591	1.31508
	2.7024	3.92955	1.42626
	3.14171	3.75155	0.349539
	5.07885	4.34913	3.90859
	0.999855	0.762235	4.39476
	0.752598	2.63013	0.97084
	3.54401	0.161768	1.17505
	0.305061	2.68478	1.60571
	3.58378	0.254494	1.5896
	3.15199	2.91182	4.18838
	3.55912	3.82266	3.9235
	1.98918	3.15849	2.75116
	1.66161	1.06842	3.27706
	0.197927	2.44081	4.11968
	3.81516	3.23799	3.41692
	2.24061	4.11085	3.47601
	1.17538	1.23853	4.541
	2.68049	1.51709	4.04615
	3.07159	2.02424	2.9107
	3.50911	0.272615	1.25341
	3.9431	1.20013	3.97603
	1.58408	0.684282	0.76032
	4.89231	4.24342	3.73349
	4.32554	4.05668	0.703774
	0.829184	3.41585	0.444311
	3.99957	3.28567	0.413714
	0.66187	3.40667	1.53841
	1.07477	3.30519	0.687722
	2.26053	3.51678	3.14211
	4.478	1.25523	3.35558
	0.608229	0.351729	1.31084
	0.247416	1.76436	0.308846
	3.22738	0.385983	0.983146
	0.720128	4.29431	0.705304
	3.42912	0.911636	1.04708
	1.02722	1.93508	1.35101
	1.29371	3.84413	2.58167
	1.80048	2.67893	3.13092
	0.63509	3.72901	4.40815
	1.5469	3.1052	3.36123
	3.08615	3.36989	4.26904
	0.973408	3.34327	2.92016
	2.39537	3.00997	0.125454
	3.46812	1.05191	1.21529
	2.81423	2.94147	2.93915
	3.31531	0.768257	4.27308
	3.13173	0.569413	2.57447
	0.734705	3.10876	2.07201
	3.0888	3.2012	0.119604
	2.10213	3.8118	0.346979
	2.43258	4.25612	1.58178
	0.672448	3.81901	1.42387
	1.38245	3.10876	2.44786
	0.226417	1.36736	2.30349
	1.36091	3.84812	0.121126
	2.55496	3.96923	0.735577
	0.850902	3.21588	0.293739
	4.23297	2.5009	2.51863
	0.0780824	1.7609	2.23124
	3.10156	1.99123	0.823407
	3.89066	2.01943	0.388858
	3.54245	0.512958	1.6882
	2.87384	0.674786	0.605819
	1.96809	3.54826	0.897196
	3.23283	3.93407	0.821473
	1.0316	3.57585	2.05711
	1.03159	3.95207	2.7403
	0.171455	3.11375	2.67821
	4.22308	2.38537	2.42064
	3.8363	1.24686	0.503038
	2.37717	4.39038	0.985837
	0.277929	3.46123	2.16428
	0.515188	2.14846	1.5453
	4.51764	3.46795	1.5932
	1.28821	0.751986	1.37322
	2.09109	3.31626	1.85438
	1.22208	2.81195	0.285908
	0.0848043	2.64141	0.867983
	1.20027	2.6489	2.67846
	3.60092	3.83634	3.27797
	0.857343	0.609779	0.312784
	0.567933	1.00232	0.2581
	1.39675	0.619032	2.78984
	1.57024	2.19347	0.0966736
	3.03879	0.635832	3.41121
	2.24173	0.229458	3.35172
	2.73124	0.516787	5.34406
	2.74016	3.64158	3.4606
	1.51079	3.51159	3.43761
	1.24922	3.37653	0.291384
	2.52111	2.19121	3.51798
	0.840131	1.55248	0.675391
	4.21142	0.384867	1.61247
	1.48001	0.627345	0.542799
	3.42148	3.68493	2.10152
	2.87912	3.61466	0.147447
	3.38722	2.15198	2.73833
	1.35882	3.0157	1.71885
	1.35057	0.28149	1.79348
	2.7594	2.26717	0.526138
	1.75056	3.33524	3.51005
	1.53041	1.77048	1.49323
	3.26098	2.99559	3.73904
	3.55385	1.13354	4.25488
	0.450164	0.102938	2.63859
	3.14853	3.68654	3.56899
	3.02472	3.88442	3.67774
	0.543186	4.02939	4.63836
	1.02615	3.33688	2.78462
	1.33515	3.50294	4.39077
	2.28829	0.685996	3.84783
	2.80319	2.60484	1.3712
	0.503903	2.34689	0.428953
	3.94501	2.09446	0.877855
	2.90995	2.56678	0.377333
	4.25613	4.43357	4.08609
	3.62769	1.55697	1.60074
	2.13607	1.15838	2.81983
	0.420298	0.261224	2.99371
	0.941602	3.81357	0.193037
	1.76919	4.1496	2.45305
	1.03669	4.3449	0.649751
	0.594969	4.11346	0.282008
	2.7908	1.99627	0.510976
	2.17467	0.411511	1.98136
	0.0994235	1.79965	3.38641
	2.85613	3.33065	2.55184
	2.57045	0.284264	2.7994
	0.942548	3.93326	2.25543
	1.28269	0.129545	4.11865
	0.3451	4.25944	2.51699
	1.05527	4.09197	0.368599
	0.657063	1.61426	0.77956
	0.867629	3.15856	0.0792003
	0.256458	3.61307	0.0878237
	1.86879	4.01789	1.77668
	0.616731	1.15318	0.309124
	3.83019	3.1512	2.00315
	4.07236	1.60062	3.33131
	4.54312	0.822963	4.3101
	3.778	1.68374	3.77852
	3.10747	1.45769	4.04846
	3.1445	1.58821	0.846407
	4.00411	1.75532	3.34514
	3.59673	1.40175	2.98743
	2.48333	3.98613	2.80192
	2.3489	3.59684	2.95524
	3.6537	0.765043	0.919093
	2.83947	3.64827	4.24811
	2.36352	4.70355	0.491259
	3.20148	0.39256	1.97452
	3.5296	1.91521	1.11396
	0.702579	0.912853	3.08629
	0.391847	5.43187	1.42755
	1.67546	4.06172	1.86198
	1.42465	1.36361	1.92428
	1.11635	2.64258	0.525958
	2.89598	3.99731	1.40471
	4.22156	2.20263	4.31285
	2.32066	4.11154	3.82952
	1.25817	3.61714	4.25916
	2.94011	3.84272	3.40052
	0.416293	3.74876	1.81075
	1.78807	4.00877	1.75897
	0.278359	4.00144	0.791538
	2.27859	3.38452	3.38326
	1.66562	0.297399	1.58288
	4.71019	3.59757	1.05722
	2.75513	1.62234	1.50415
	2.05032	2.03865	1.36813
	4.47834	1.53852	0.395303
	2.33547	3.95894	1.24355
	2.75729	3.65836	3.27067
	0.529264	0.193803	0.495328
	2.91965	2.30338	0.936846
	3.66052	0.958989	0.146998
	3.69261	3.17376	3.46326
	3.52727	2.12584	3.29615
	3.33209	1.48629	1.95517
	3.62076	0.392375	1.39299
	0.531176	1.32404	0.99956
	3.05621	0.140527	2.48917
	3.35399	0.482775	1.6689
	0.665174	3.38146	0.686156
	3.46779	0.529766	5.14081
	3.82448	0.401718	1.01289
	0.342037	0.660949	0.151207
	1.0166	0.343876	1.94662
	2.56232	0.23293	1.69113
	1.00467	2.3357	0.125999
	3.4955	2.84253	4.11254
	3.02534	2.58547	3.26619
	0.627493	1.5444	3.05072
	0.0961358	0.801522	3.07024
	0.463984	4.40417	2.89963
	2.85214	2.3859	3.20103
	1.32811	1.41365	3.09796
	1.39763	1.61911	2.57593
	2.50441	0.280565	3.16691
	0.459236	0.76841	2.46807
	1.12706	2.15744	0.82392
	1.06346	0.440522	2.64951
	2.37976	2.65827	1.78336
	0.483588	3.66482	1.03357
	1.6496	3.21954	0.299475
	3.88055	0.203349	0.728154
	2.22795	3.00889	3.48743
	3.65223	4.79674	4.82074
	3.48837	3.03221	0.406609
	0.962705	3.64148	0.227115
	3.14188	3.91471	0.65226
	2.71351	3.30788	3.06717
	5.08192	4.14719	0.873986
	2.50029	4.06387	3.25233
	3.38207	3.55256	0.320905
	0.0951935	2.82475	1.52019
	2.5804	3.42836	0.434697
	3.14406	2.12379	0.360788
	2.88205	2.73249	0.566175
	1.79841	2.74431	0.273082
	4.53096	2.68129	1.22746
	1.43036	4.07687	1.14784
	1.50232	3.59361	1.17312
	2.01917	1.59512	1.21617
	3.52111	3.26546	0.53699
	2.26506	3.50655	0.391399
	1.63507	3.70041	0.26518
	0.547254	4.51001	2.22495
	2.69591	3.47147	0.147092
	0.669267	3.26961	1.06118
	0.0987407	1.70997	2.18358
	2.76143	4.51376	3.16442
	3.63903	3.17692	3.55427
	3.38485	4.54679	2.98098
	2.08068	3.4517	3.63001
	4.16927	3.26657	0.936749
	0.767094	4.40615	3.02606
	0.420629	1.00906	0.43852
	3.74793	2.91683	4.31174
	2.05847	0.807983	0.126145
	1.4645	1.20103	0.10866
	2.53944	1.79859	0.439678
	0.387936	1.46822	1.11241
	0.596365	4.20199	2.94772
	2.57739	1.041	0.399172
	2.51247	1.03072	0.966128
	0.287577	1.77756	0.247779
	0.756953	2.42915	0.732299
	1.90048	0.754728	0.812354
	1.1354	3.621	2.6549
	4.05124	3.91471	2.12099
	4.03161	3.27293	2.31983
	4.29993	4.5901	1.64964
	2.90857	4.17176	2.15305
	0.825169	3.91538	1.0274
	0.684633	3.46247	2.13846
	1.81981	2.6	1.47376
	4.19956	2.8752	3.92279
	1.39722	0.552695	0.343295
	0.871037	2.69047	1.22692
	2.429	3.00688	1.68391
	1.06352	1.34162	0.442082
	3.42188	1.90959	0.605236
	4.85171	1.51642	1.86344
	2.30855	3.20928	4.11683
	2.91384	0.904821	3.8274
	3.87263	1.20085	1.89112
	2.5499	0.726697	0.771923
	3.05474	4.25869	0.940284
	4.37385	2.16915	3.89385
	1.68791	3.38753	0.158407
	2.85757	2.56446	0.208839
	3.13541	4.28377	2.50877
	3.08224	3.43503	3.83619
	2.98893	1.06459	3.0335
	0.553042	1.50394	0.137464
	5.39399	3.44606	1.4104
	0.931277	4.4576	2.47812
	0.801148	2.68784	4.23396
	1.54115	0.260076	3.35089
	0.187118	3.93579	3.14004
	0.705711	2.02887	1.01247
	0.673437	4.37484	2.35936
	3.94341	1.99006	0.113771
	0.242443	2.32726	4.47964
	3.30204	0.305723	2.81282
	3.46679	3.87031	4.06958
	1.44423	0.224221	3.44515
	1.60643	1.00586	1.91888
	1.5182	0.756823	2.8497
	2.14317	3.55594	2.54817
	3.51403	4.52085	0.55522
	0.178433	2.90684	3.37016
	0.761178	3.76933	3.2913
	0.562171	4.24551	2.08113
	3.46943	4.01337	2.83234
	1.46458	3.15243	3.00401
	1.64468	4.34687	1.02991
	1.61042	3.39313	1.11649
	1.6605	2.3205	3.43319
	0.562912	3.8146	3.12443
	2.26078	3.54984	2.90385
	1.96241	3.96761	3.94064
	2.31288	3.54066	1.72886
	4.03183	0.486202	2.72942
	0.339716	0.172009	1.52464
	2.97051	1.00036	4.82786
	1.89513	1.02066	4.11154
	4.11302	4.46932	0.377685
	0.830283	3.95276	3.97133
	0.424653	3.40896	0.297395
	4.19201	2.10361	3.11257
	4.43765	2.98432	4.56838
	0.632304	0.162519	3.21858
	2.85721	3.81106	2.40562
	2.63726	3.02407	3.35066
	0.205842	3.60287	1.33736
	0.156988	3.6268	1.49788
	2.09422	3.33937	0.319341
	0.314858	0.206085	3.0004
	3.28738	1.16569	1.28919
	0.588433	0.877537	0.569455
	0.30038	2.7	2.8138
	1.79784	3.13569	1.01364
	0.84277	3.49324	4.28915
	3.97096	3.18268	4.64376
	3.86006	3.47123	2.54487
	2.62226	2.13296	2.77622
	3.7475	3.16172	3.43141
	3.08098	2.86737	4.25037
	5.15524	1.16321	0.297152
	0.507373	1.42461	3.94606
	0.769423	0.374325	4.18331
	0.147809	2.72412	0.385855
	1.59016	0.701224	1.02937
	2.2268	3.66631	2.47575
	2.15586	5.24579	4.56791
	4.14604	3.87427	0.76387
	0.376164	0.109646	3.99794
	1.08179	4.05699	4.55288
	3.26239	0.777213	3.80128
	2.48156	1.90663	0.0857902
	0.369379	1.64775	1.74521
	2.37446	3.61513	0.772691
	3.53378	4.20448	0.247114
	0.853284	3.79108	1.6249
	4.94672	1.53464	0.514449
	3.18486	2.02236	1.61074
	0.867553	2.18527	0.986037
	2.63548	0.114766	2.25119
	2.33943	1.81866	1.84608
	3.58779	3.86202	3.10541
	0.60446	3.43284	1.41403
	1.65594	3.35533	1.96209
	3.40699	4.20185	3.62098
	3.88667	1.59328	0.243972
	3.63799	2.95036	3.14223
	2.69503	2.88199	0.183417
	2.17308	3.9397	0.0825516
	1.54772	2.8351	2.58987
	3.38214	2.79828	3.497
	1.6253	3.14615	1.76109
	3.13705	3.28976	3.00359
	2.489	2.4417	3.59333
	2.35684	0.621749	3.90506
	2.90562	0.554475	3.41308
	0.801923	2.98348	3.76272
	0.544134	2.94453	2.97742
	0.789077	3.48066	3.11795
	3.23776	0.620874	3.92045
	2.56494	1.81841	4.23355
	2.28915	0.559997	2.29218
	0.850519	0.191405	1.17163
	2.20577	1.03085	0.466259
		1.48935	2.89507
		0.28155	2.92546
		0.759504	4.49493
		3.6044	3.85118
		2.67004	2.37716
		2.60327	3.49754
		2.97983	0.499537
		2.35986	0.444982
		3.73453	0.266384
		0.571087	3.15897
		0.168735	3.68846
		0.728619	3.62098
		2.81808	0.154396
		1.43636	1.20283
		0.365203	3.24481
		1.87455	3.28514
		1.53504	0.764095
		2.38413	2.71482
		4.18072	0.148388
		3.05348	1.81808
		3.42308	4.09736
		2.55261	4.07267
		0.723152	4.32645
		3.43685	3.53866
		3.03692	1.49845
		1.39297	2.32211
		3.70541	0.350524
		1.37969	0.167446
		0.809355	2.13775
		0.124875	0.361937
		2.70101	0.445541
		0.689929	0.276735
		2.99799	0.697976
		3.02709	0.373349
		2.87591	1.86198
		3.18521	0.469676
		4.90207	1.57308
		2.19962	0.664293
		2.36408	3.15351
		2.94341	1.32622
		2.77519	0.427607
		3.73279	0.166602
		0.55755	0.64403
		0.873654	3.84383
		0.444491	2.74921
		4.41357	0.580291
		2.80936	2.46646
		4.60462	0.0934006
		2.53017	0.687779
		3.09336	0.400679
		3.64423	0.466126
		2.89294	1.02398
		3.30007	0.226046
		1.45398	1.91462
		1.92185	1.85571
		3.53434	2.37771
		3.36851	0.446658
		2.68286	4.10359
		2.03818	4.02661
		2.22536	2.36667
		1.28419	1.49583
		1.42838	3.2422
		3.9869	0.598212
		0.756976	1.83677
		1.46208	3.4536
		3.36665	4.5653
		3.3049	3.43141
		3.84707	3.43141
		3.64465	0.28105
		3.56026	2.48568
		3.00088	0.634133
		2.64317	0.361012
		3.02949	0.908961
		4.01262	2.85307
		3.12215	1.93006
		3.05884	2.465
		2.27439	2.55626
		3.32873	2.62812
		0.997565	2.17153
		0.268127	0.420369
		1.62218	3.31671
		2.13298	0.960496
		0.171767	0.421544
		2.30469	2.1535
		3.16578	0.565556
		0.342438	1.06899
		4.75247	3.1089
		1.03011	3.83066
		2.99796	0.0997655
		0.7527	3.33462
		4.32594	0.34464
		4.85764	2.83308
		4.28307	1.05824
		2.20255	1.3564
		1.96196	3.67824
		0.233317	3.82814
		0.537046	2.87813
		1.90495	1.69827
		0.65671	3.82431
		1.27405	4.26637
		1.59176	0.871225
		1.35371	1.90316
		1.79554	3.90256
		0.57775	3.19329
		2.60535	0.609214
		2.78459	5.84808
		0.516291	3.35011
		3.44587	0.686772
		0.639993	0.218767
		0.745739	2.7407
		2.58556	0.331667
		3.51002	4.38476
		1.67385	4.96014
		1.56108	3.33453
		2.22157	3.46276
		4.10701	5.30817
		4.22783	3.17017
		2.13048	3.36673
		2.96881	2.88515
		4.15617	4.05073
		3.66422	3.96044
		3.40264	2.65311
		2.97675	3.52995
		3.37052	3.15968
		2.67197	0.746223
		2.25165	2.10645
		0.442495	2.89022
		0.700516	0.435551
		1.65563	1.71593
		2.00996	3.97811
		2.96692	1.96954
		0.846702	1.66007
		1.26319	2.17286
		3.04022	0.385968
		0.213959	0.401284
		0.854063	4.06354
		3.25437	2.26068
		2.96929	0.885907
		3.08099	0.547751
		1.41349	4.34409
		2.09563	3.99694
		3.96631	3.43597
		1.55242	3.57163
		2.44524	2.55358
		0.467953	4.12308
		1.2633	2.20137
		4.08237	2.14089
		2.14289	0.178498
		2.38538	0.386152
		2.6443	0.520906
		0.910235	1.13686
		2.71624	1.96789
		2.7629	3.97596
		0.176325	1.84156
		2.21837	0.102715
		2.4612	0.470671
		0.193634	0.203775
		0.0967563	0.358528
		0.483578	3.49144
		0.616213	0.868268
		3.08795	0.829593
		2.89774	3.43148
		3.04007	3.33166
		3.1909	1.21295
		0.429849	2.22646
		3.27268	3.45816
		2.17459	4.36275
		2.72769	4.13008
		2.45068	4.06501
		2.2883	4.07917
		2.64524	4.07917
		3.25753	4.03156
		2.14431	1.0416
		3.98201	3.88447
		1.96789	3.09026
		1.10847	2.66237
		2.37169	0.53814
		3.20473	2.70397
		2.41429	1.81938
		0.105269	3.15339
		0.91467	1.83275
		3.22798	0.414575
		2.08514	3.48243
		2.90234	3.26992
		4.5129	2.40541
		2.71116	0.551106
		3.54292	2.74993
		3.81787	3.29242
		2.64157	1.50154
		2.82925	1.26276
		1.80551	4.44292
		2.44044	2.23937
		2.69571	0.581125
		3.92649	2.43609
		1.60048	1.77324
		4.20673	1.96697
		0.855858	1.55591
		0.402115	0.911511
		1.91398	3.3551
		1.3731	2.66713
		2.19283	0.400054
		3.49381	1.98062
		1.42945	1.57171
		1.13866	0.553236
		1.02221	3.22249
		3.38795	5.10417
		2.98077	2.06076
		2.99225	0.588187
		2.42816	1.2945
		2.44179	1.44961
		0.171724	1.2782
		0.314989	4.40166
		2.96162	3.08829
		2.29494	4.54811
		1.27947	0.930851
		2.7097	0.772598
		0.258081	0.971575
		1.73492	2.74942
		0.0989712	0.514005
		1.32163	1.61486
		2.88429	0.559038
		2.89231	2.75951
		4.48182	3.45849
		3.825	0.276994
		0.379347	1.45116
		1.77401	1.3286
		0.162317	3.49846
		0.0930184	2.10166
		1.76526	3.01196
		4.3283	1.78442
		1.88312	1.08246
		0.646992	0.897594
		0.68666	2.42201
		2.21344	1.24385
		0.364312	2.1767
		0.412563	1.91084
		1.92638	2.46946
		0.536527	0.220949
		1.76877	3.83459
		1.40673	2.72744
		1.43971	1.79064
		2.80231	3.14043
		3.21296	1.87552
		2.14662	3.68407
		1.44205	1.32087
		1.84882	2.56909
		1.32242	3.58173
		2.87462	4.3642
		2.8465	0.641972
		1.6721	0.516699
		1.2492	1.2209
		3.87367	4.067
		2.5747	4.65173
		3.04643	1.67452
		3.02977	2.43992
		2.99929	2.40168
		0.342558	4.03444
		2.37062	1.15879
		2.59164	3.67069
		2.53266	1.93466
		3.51032	0.18187
		2.55966	4.11113
		1.697	2.74875
		3.00871	3.73741
		1.78214	1.96355
		1.44109	0.514748
		0.855888	3.528
		3.7726	4.16015
		2.14953	1.89814
		1.57739	0.131293
		1.9749	1.0215
		2.08692	0.5937
		2.03012	0.239892
		2.85523	0.478398
		3.066	0.519506
		2.5478	0.32756
		2.87438	1.73386
		2.90951	1.42268
		3.26595	3.49286
		3.32063	3.71073
		1.9247	2.47998
		2.37165	1.12189
		2.01908	2.79156
		2.48164	0.291871
		2.41856	0.648294
		0.45525	1.7625
		2.61705	0.473182
		0.521839	4.32359
		0.0895329	0.201281
		0.999802	1.67416
		0.753135	0.76076
		1.57382	4.56459
		2.33138	4.14863
		0.141292	4.19794
		0.134338	3.92345
		3.24487	3.14201
		1.12562	0.29573
		2.8206	0.120342
		2.71835	0.228742
		1.76231	0.274566
		1.14599	2.46787
		1.65522	0.165372
		2.4031	1.02263
		1.00128	5.11026
		2.13618	0.144438
		0.538827	1.31535
		0.537054
		2.15949
		2.03082
		2.04211
		2.10778
		2.24898
		4.16247
		2.56467
		3.41555
		1.06222
		0.595605
		0.171686
		3.43006
		0.790376
		0.584506
		3.8956
		1.93699
		1.02998
		1.30513
		2.92555
		1.89264
		3.06893
		3.69482
		3.36252
		3.51818
		3.50905
		3.00519
		0.474235
		0.305027
		0.89602
		2.02628
		2.00076
		4.39733
		2.20612
		1.20931
		0.954221
		1.14671
		1.63973
		2.24438
		0.425869
		0.551196
		0.851331
		0.727039
		3.50043
		4.2939
		3.0745
		5.87443
		2.01945
		2.65516
		3.04387
		2.43146
		4.87308
		3.43179
		1.73863
		1.95967
		3.9094
		1.65302
		2.05621
		1.65336
		0.88064
		0.129337
		0.226847
		1.69872
		2.11032
		3.37802
		2.41888
		1.85972
		2.10649
		2.20638
		2.65046
		3.4511
		3.69135
		4.35377
		1.74094
		0.204514
		1.88175
		1.51215
		0.514079
		1.73632
		2.85734
		1.12834
		4.78375
		3.75588
		1.58596
		0.593854
		0.444668
		0.172065
		0.723649
		2.14381
		2.89639
		2.81978
		1.64987
		1.31457
		3.07093
		1.55368
		2.19636
		3.44897
		1.87817
		3.39287
		2.74679
		4.11987
		4.05417
		3.25477
		1.57932
		0.603066
		2.43108
		4.8556
		1.90946
		5.39505
		0.451851
		1.17708
		1.59804
		1.44349
		5.69514
		2.18111
		3.34171
		3.57272
		0.257494
		5.21169
		3.73365
		2.42441
		0.301559
		1.71739
		0.980358
		1.52447
		2.65131
		2.98096
		3.4095
		0.851795
		2.99304
		1.45406
		0.301688
		3.26574
		3.13591
		2.67897
		2.98259
		2.47595
		2.30115
		1.55414
		0.386979
		1.6861
		0.935166
		3.37735
		1.54556
		3.13794
		1.15339
		3.34874
		3.37167
		3.75421
		3.88357
		2.7999
		4.29861
		1.40279
		2.45793
		2.43658
		3.19106
		3.82093
		0.927909
		3.95762
		0.392948
		1.36291
		0.826752
		4.06519
		2.69221
		4.42938
		4.04337
		2.85546
		0.719682
		0.919431
		0.640096
		0.880428
		1.88846
		4.4255
		2.61733
		2.91115
		3.12396
		2.41365
		2.29132
		3.55728
		1.03202
		0.510976
		0.872132
		3.9364
		4.19672
		0.254933
		2.11115
		0.416465
		2.02208
		0.412088
		3.36394
		2.19943
		3.32159
		0.514985
		2.5066
		1.58656
		4.49504
		3.11306
		3.76373
		0.333881
		1.43597
		1.47498
		0.798411
		3.77554
		1.01595
		3.47051
		3.74441
		2.84573
		1.3639
		2.52269
		1.3388
		1.68806
		3.36579
		4.59034
		4.34231
		5.31773
		4.28513
		4.90839
		0.969745
		1.00599
		3.13853
		0.202301
		1.81664
		2.7253
		3.34245
		0.737793
		2.05115
		0.958827
		3.32349
		3.15008
		2.50192
		4.28787
		3.53855
		2.30445
		1.50163
		3.71503
		3.17241
		3.78636
		1.86807
		0.237697
		1.91319
		4.13922
		0.809432
		0.722503
		0.530336
		2.89336
		2.73097
		1.96441
		2.28866
		1.46183
		3.04808
		1.3855
		3.15
		1.82692
		2.7047
		3.32624
		0.724932
		0.0822945
		0.608564
		0.275019
		1.62245
		0.121463
		0.282507
		0.618434
		0.986954
		0.58414
		0.102926
		2.88183
		2.98849
		2.19274
		3.41953
		2.90477
		1.83302
		1.54172
		0.479936
		0.297466
		1.80756
		1.33855
		1.6484
		0.966852
		3.1263
		1.87094
		1.12044
		3.48732
		5.71282
		1.49734
		0.608421
		1.9869
		1.54205
		1.95456
		0.870421
		1.09843
		0.888031
		0.459341
		2.44231
		2.9905
		1.65201
		1.81689
		0.563805
		0.54349
		1.21212
		1.58613
		1.45062
		1.66713
		2.60504
		3.81086
		1.94074
		4.63275
		4.52301
		1.8545
		3.38262
		3.8695
		5.38506
		1.56655
		3.34296
		4.1633
		0.124373
		3.34587
		3.78179
		0.907345
		4.14085
		3.08846
		3.19408
		3.05994
		2.05751
		0.411525
		0.307066
		1.06744
		1.92605
		0.307922
		1.33545
		2.80758
		0.470423
		0.233259
		0.8933
		0.872241
		0.667795
		1.16282
		2.31308
		5.11417
		0.237351
		0.321164
		0.630359
		2.88732
		1.93436
		1.02745
		3.13193
		2.65577
		3.48424
		2.05497
		0.806714
		0.822345
		0.135811
		2.64524
		3.48066
		0.599401
		1.84905
		4.24327
		0.568085
		0.59108
		0.506744
		2.18849
		3.78988
		1.23129
		0.219464
		0.487697
		3.49369
		0.256831
		3.12696
		0.764479
		0.278881
		3.10944
		3.74734
		2.88439
		0.932005
		3.45586
		0.530742
		2.71073
		2.55295
		2.72246
		3.23462
		0.767379
		3.58403
		3.67386
		1.99272
		1.85259
		2.26953
		1.91136
		2.01554
		2.05842
		1.64673
		1.00528
		2.54152
		3.3081
		4.14541
		2.07674
		4.88878
		1.21822
		1.13418
		3.13038
		3.2674
		3.07513
		2.60603
		2.75758
		0.170678
		2.48728
		3.23762
		3.00353
		3.72469
		3.46953
		0.7139
		0.280914
		3.42486
		1.55454
		3.76793
		2.36667
		0.990018
		0.798688
		1.54691
		2.83669
		3.9344
		4.05388
		4.05853
		3.47847
		3.65026
		1.9629
		0.984972
		1.0696
		3.17716
		3.2715
		3.65203
		3.23232
		0.902354
		0.241286
		2.32291
		1.95577
		3.86082
		1.24188
		0.973518
		4.69736
		2.9208
		4.43313
		0.493352
		1.50754
		1.54646
		0.0843122
		3.55646
		0.752078
		0.345184
		2.3893
		0.0906334
		2.24432
		1.09225
		2.14433
		4.70238
		3.22785
		2.67183
		3.77184
		2.84528
		2.22021
		4.12256
		3.41836
		2.18037
		4.31312
		3.64
		3.88038
		4.26128
		2.21553
		2.45918
		2.79572
		4.2651
		3.2131
		3.85567
		0.385577
		1.40391
		3.42724
		3.53692
		2.93219
		0.835076
		1.81357
		0.9181
		2.56008
		1.99067
		0.816345
		0.462963
		2.07185
		4.07275
		2.81573
		1.51422
		0.187063
		3.19799
		0.896922
		3.83555
		1.03012
		0.842571
		1.76833
		0.996875
		0.850167
		2.67325
		3.95541
		3.81832
		3.99971
		0.22577
