# Supplementary material for: Huntingtin recruits KIF1A to transport synaptic vesicle precursors along the mouse axon to support synaptic transmission and motor skill learning
Source: eLife. 2023 Jul 11;12:e81011. doi: 10.7554/eLife.81011 (PMC10365837; doi:10.7554/eLife.81011)
Supplement: Figure 1—source data 2. [file elife-81011-fig1-data2.xlsx]

## Sheet: Figure 1b-Retrograde velocity
	Wild-type	HTT-SD	HTT-SA
	-1.83924	-1.24932	-0.694808
	-0.912389	-1.23597	-1.17456
	-0.400651	-0.205372	-2.71538
	-0.931042	-0.611344	-2.18944
	-0.82238	-2.75499	-2.17001
	-0.758024	-1.18988	-2.10127
	-0.687484	-1.37512	-2.11895
	-0.174514	-0.780519	-2.36826
	-0.302319	-0.434682	-0.948203
	-0.245373	-0.150686	-2.38963
	-2.49725	-0.704094	-2.87753
	-0.610272	-0.129059	-1.26951
	-0.328144	-3.49802	-1.51194
	-3.88462	-1.30257	-1.93905
	-1.68213	-1.37681	-0.320194
	-0.106956	-0.820573	-0.711573
	-0.664283	-0.720694	-1.13085
	-2.5704	-1.36086	-0.129009
	-1.21803	-0.910546	-1.73236
	-2.06067	-1.82037	-2.09235
	-3.33979	-1.36494	-1.86093
	-2.54154	-1.33185	-2.00154
	-2.53908	-0.619158	-0.956697
	-1.27898	-2.00148	-1.99748
	-1.7797	-1.70693	-0.484389
	-1.3184	-0.594612	-2.24598
	-1.29875	-0.604695	-2.19596
	-1.27081	-0.756192	-0.41736
	-3.1647	-1.03935	-1.35978
	-2.58981	-1.95154	-1.18365
	-0.326295	-2.15705	-0.599324
	-0.158284	-1.99385	-1.15401
	-0.565928	-0.475542	-1.64645
	-0.43526	-2.37529	-0.946747
	-0.294636	-1.87514	-2.10788
	-2.89577	-2.67943	-2.0984
	-2.41118	-4.04	-1.86871
	-1.49703	-0.366855	-1.38453
	-1.9375	-0.449166	-2.02023
	-0.381026	-0.214103	-0.688912
	-0.363026	-0.44655	-2.10769
	-0.108624	-1.88419	-1.87115
	-1.81674	-1.13815	-1.55816
	-1.41545	-0.466914	-1.3353
	-0.779574	-1.66846	-0.844976
	-1.47503	-0.21294	-2.64634
	-0.195178	-1.47199	-1.19717
	-0.662561	-0.974326	-0.485711
	-0.584718	-1.39706	-0.576391
	-0.615882	-2.20762	-0.116054
	-0.422025	-0.837645	-0.332394
	-0.949076	-1.09292	-1.47941
	-0.410883	-2.5809	-0.707364
	-0.422025	-3.53269	-2.12692
	-1.42967	-1.68538	-2.45994
	-2.42138	-0.435853	-1.49067
	-0.19304	-1.91199	-4.07196
	-1.85429	-2.36944	-3.38332
	-0.0916464	-0.246428	-2.61965
	-1.81715	-4.94567	-3.05809
	-1.50253	-2.35506	-1.86941
	-1.26085	-2.8122	-2.43704
	-1.07221	-0.943654	-0.32671
	-3.4767	-0.459572	-1.09553
	-0.421662	-0.691831	-0.426624
	-2.34133	-1.4133	-0.453576
	-1.10775	-1.84834	-1.77763
	-0.773317	-0.792673	-1.18336
	-1.7093	-1.50796	-1.43727
	-0.840963	-3.04976	-0.228179
	-1.35041	-0.482065	-0.893695
	-0.913824	-0.418207	-1.82343
	-1.10775	-0.690447	-1.41849
	-2.03913	-0.108328	-0.568908
	-0.338733	-2.0268	-0.730086
	-1.78642	-2.79566	-0.646745
	-1.58898	-0.270122	-1.02786
	-1.29329	-0.549771	-0.755239
	-0.392795	-0.542604	-0.68249
	-0.86788	-0.675796	-1.68441
	-1.42951	-0.116451	-0.106036
	-1.02791	-0.253897	-0.205743
	-1.84811	-1.72319	-0.668695
	-0.565893	-1.32916	-0.16005
	-1.41599	-1.24404	-0.701645
	-1.25055	-1.31923	-1.49896
	-3.4855	-0.13092	-0.0934554
	-1.66361	-0.690109	-1.70464
	-3.51256	-1.18521	-1.78462
	-3.30057	-1.08547	-1.58305
	-1.30273	-2.4828	-1.47266
	-0.706769	-0.977183	-1.82767
	-1.25351	-1.40747	-0.427212
	-1.32753	-2.6052	-0.361227
	-1.8599	-0.358373	-0.715186
	-1.63681	-0.657621	-2.0259
	-1.27525	-1.30119	-1.45641
	-0.928705	-0.380885	-1.90221
	-0.861146	-0.63857	-1.80912
	-1.74037	-0.781345	-1.47165
	-0.798987	-1.24688	-0.847293
	-0.310496	-0.921954	-0.207435
	-0.97557	-1.08063	-2.80647
	-0.209826	-0.400729	-1.20677
	-0.853836	-1.09285	-0.869823
	-1.13913	-0.55325	-0.814659
	-0.671282	-0.872874	-0.845636
	-0.108421	-1.65818	-1.10646
	-0.710308	-1.87531	-4.00923
	-0.883935	-2.28064	-2.2959
	-2.16781	-0.9458	-1.95214
	-1.2228	-0.114193	-1.88929
	-0.695048	-0.970411	-2.44589
	-4.05457	-1.99339	-2.32553
	-1.43179	-2.42847	-3.37913
	-0.248327	-1.60525	-0.862964
	-1.09217	-0.751815	-3.39699
	-1.13774	-1.29851	-2.00617
	-1.32352	-2.05708	-0.977103
	-1.24523	-1.30195	-1.79304
	-0.591923	-0.427482	-1.79853
	-0.834615	-0.796521	-0.926961
	-0.42362	-1.06247	-4.02157
	-1.33827	-0.717545	-0.279911
	-2.08165	-1.48348	-0.955351
	-2.26199	-1.06072	-1.82478
	-1.81726	-1.23248	-0.110651
	-1.42078	-0.824429	-0.753868
	-0.524762	-1.41761	-1.89737
	-0.641266	-1.37912	-1.31096
	-2.4081	-0.659411	-0.980952
	-2.4207	-0.18397	-2.39814
	-0.875774	-0.773143	-3.30377
	-0.769322	-0.73677	-3.85264
	-0.790705	-0.443132	-2.51951
	-2.46179	-0.933668	-0.793603
	-1.36184	-3.25215	-0.758668
	-2.31625	-0.632855	-1.59737
	-0.205013	-0.777694	-0.617233
	-0.963636	-1.6286	-1.13978
	-1.06377	-0.193754	-1.69576
	-1.28629	-0.139328	-0.228984
	-2.20769	-0.807554	-0.43318
	-2.4363	-0.490099	-1.46649
	-0.72293	-1.28617	-0.898022
	-0.568106	-3.34863	-1.55967
	-1.20418	-0.620896	-1.00528
	-1.47899	-0.102907	-2.31965
	-0.350724	-0.507147	-1.30583
	-0.335329	-2.64024	-3.4796
	-2.41244	-1.37256	-3.15399
	-1.62206	-1.75871	-0.422712
	-1.94109	-0.136706	-0.426575
	-2.27633	-0.686234	-0.70184
	-2.05856	-1.19238	-1.77881
	-0.44447	-1.10463	-1.34478
	-1.37769	-2.12176	-1.78117
	-0.806498	-0.175354	-0.752837
	-3.35347	-2.9486	-0.659529
	-2.10623	-0.728226	-0.366313
	-0.489969	-2.87227	-0.938833
	-2.58983	-2.72129	-0.590171
	-2.63382	-2.3933	-0.200391
	-3.23489	-2.96546	-0.377864
	-2.66678	-2.42285	-1.20448
	-2.63382	-0.453072	-0.295539
	-0.0803911	-1.0811	-1.38909
	-0.147335	-0.726839	-1.0579
	-1.78244	-1.43622	-1.10442
	-0.528807	-0.695416	-0.457114
	-0.192314	-0.481424	-0.620548
	-2.46846	-0.444306	-1.62593
	-2.34926	-1.19122	-0.458488
	-0.698501	-1.90529	-2.6168
	-1.62853	-1.82974	-0.567507
	-2.80513	-2.49331	-2.3312
	-2.57132	-0.540537	-0.358427
	-0.965873	-0.759899	-2.44309
	-1.73142	-2.10393	-1.47763
	-1.26445	-1.1392	-2.32477
	-1.71608	-0.837125	-1.83236
	-0.867479	-0.424423	-0.0879058
	-1.20291	-1.4671	-1.59508
	-0.410551	-0.429592	-1.33346
	-1.60299	-0.423507	-0.35117
	-0.478371	-0.131739	-3.26113
	-0.622785	-0.359712	-3.27061
	-1.29346	-2.66241	-0.359898
	-2.38228	-3.2496	-0.544989
	-0.733616	-1.46821	-1.0617
	-0.471518	-2.30186	-3.33814
	-1.42934	-0.509309	-2.01284
	-1.41253	-1.14377	-2.93298
	-0.187649	-2.02692	-1.72448
	-3.97386	-0.65434	-2.28194
	-1.66228	-0.732737	-0.863449
	-0.178786	-0.87069	-2.61139
	-0.324633	-2.61897	-1.84463
	-0.724197	-2.62536	-1.20419
	-1.25957	-0.24938	-0.491885
	-0.512949	-1.50373	-3.01051
	-3.16526	-0.411538	-0.41985
	-2.96278	-1.62167	-1.10052
	-3.11391	-1.9536	-1.3262
	-0.130949	-0.930841	-0.663238
	-0.687254	-0.203002	-0.926664
	-1.04694	-1.93087	-1.62985
	-1.70403	-0.616353	-2.16
	-1.55313	-0.775025	-0.780057
	-2.7922	-0.913141	-1.06408
	-1.00239	-0.879489	-0.740698
	-0.814854	-1.459	-0.747747
	-2.11476	-0.91698	-0.780846
	-0.480256	-1.76548	-0.623048
	-0.932824	-0.808167	-1.39773
	-1.80381	-3.39856	-1.45499
	-3.36435	-1.47327	-0.694109
	-1.34027	-2.01865	-1.23478
	-0.544994	-3.2204	-1.51229
	-2.83093	-1.20552	-1.75094
	-3.43141	-0.744175	-1.851
	-0.224184	-1.3063	-1.7922
	-2.09169	-0.28382	-1.82529
	-1.83244	-0.562102	-1.67534
	-3.18874	-1.71462	-0.622433
	-3.03683	-1.21312	-3.2037
	-2.91074	-0.756585	-0.582692
	-1.46868	-0.0824538	-2.05705
	-2.30113	-0.846088	-0.14685
	-1.7903	-0.293398	-3.59979
	-2.65028	-2.15283	-4.31639
	-2.63345	-0.159147	-0.634307
	-0.803579	-2.06047	-1.32352
	-0.533761	-1.13424	-0.542048
	-2.25364	-1.57151	-0.693649
	-2.91667	-2.79834	-1.62552
	-0.370426	-1.11876	-1.38171
	-0.170302	-1.63193	-0.514124
	-0.541977	-3.14397	-0.214582
	-1.4565	-2.76635	-0.269769
	-3.59271	-2.43998	-0.499121
	-1.90499	-1.3073	-1.28782
	-1.20656	-3.58523	-0.178023
	-1.62338	-0.987381	-1.94939
	-0.37822	-2.43164	-1.02945
	-2.24174	-0.271909	-2.44788
	-2.48416	-1.85562	-1.42629
	-0.205859	-0.806526	-0.571755
	-1.97292	-0.699916	-0.534092
	-1.77587	-2.1087	-0.52814
	-1.36802	-0.843284	-1.68547
	-0.577615	-2.96766	-1.59222
	-1.0417	-0.406257	-0.326029
	-1.11813	-1.15917	-1.54317
	-1.33931	-1.71551	-1.187
	-1.54217	-3.75284	-0.615929
	-1.15568	-1.31248	-1.47481
	-0.413376	-0.913768	-1.77308
	-0.913088	-0.248509	-2.19147
	-0.332582	-3.26253	-0.551513
	-2.80997	-1.97891	-1.96707
	-1.21838	-0.707967	-0.837246
	-2.96519	-2.30238	-0.194363
	-0.738804	-0.128606	-2.82885
	-2.29057	-1.07421	-0.127791
	-2.21037	-1.80816	-3.20032
	-1.3544	-2.05163	-2.14674
	-0.569752	-1.51692	-1.53827
	-1.81224	-1.04746	-2.39231
	-0.502747	-0.329305	-0.147103
	-0.736469	-0.958881	-2.47686
	-1.88654	-0.926154	-2.98249
	-0.897668	-0.160315	-0.0964907
	-2.65833	-1.23958	-3.55449
	-1.22019	-1.38754	-2.51985
	-3.42997	-2.7061	-0.951375
	-1.75147	-0.249336	-0.55188
	-0.823377	-0.673655	-0.787569
	-0.917601	-1.56943	-1.86876
	-2.28113	-2.00124	-2.47654
	-2.01092	-0.211982	-3.1625
	-2.87274	-1.41883	-1.48691
	-2.17585	-0.827425	-0.796673
	-1.79926	-1.16862	-1.95465
	-0.811746	-1.05906	-0.562452
	-1.14217	-0.386152	-1.19352
	-2.78213	-2.20173	-0.360577
	-2.26192	-2.29181	-0.277286
	-2.27267	-1.17333	-0.893324
	-1.93879	-0.750087	-1.935
	-0.399691	-2.17721	-0.207261
	-1.26656	-2.57685	-1.44099
	-3.94311	-3.16931	-0.365936
	-0.632356	-3.02766	-1.11268
	-1.13986	-2.14949	-1.30715
	-1.47312	-0.667587	-0.929774
	-0.468014	-0.566032	-2.57319
	-2.32526	-1.04984	-3.7102
	-0.753358	-2.02129	-2.88766
	-3.35044	-0.982059	-1.99978
	-2.15527	-0.726002	-2.43974
	-3.26132	-2.2697	-2.10751
	-0.152009	-1.27562	-2.96908
	-0.17397	-0.592585	-3.49949
	-3.24991	-1.71003	-0.40105
	-0.953214	-1.07688	-3.69004
	-1.23956	-0.775214	-3.06195
	-0.0997823	-2.98795	-3.45556
	-2.78039	-1.02092	-3.44356
	-1.09447	-1.79004	-1.02874
	-0.166281	-1.4354	-0.355669
	-1.18451	-2.06064	-3.11923
	-1.6966	-1.47567	-2.22957
	-2.78272	-1.28317	-0.645246
	-0.751188	-1.39527	-1.85224
	-1.81822	-0.891451	-0.616013
	-0.123472	-0.822907	-1.8131
	-1.48616	-1.27699	-1.31207
	-1.435	-1.0067	-0.345765
	-0.589431	-0.736008	-0.266455
	-0.181633	-3.30198	-1.32409
	-1.20558	-0.651755	-0.468387
	-0.89584	-2.85556	-3.23156
	-0.730295	-0.803142	-0.970741
	-1.30164	-0.859458	-2.56708
	-2.81206	-0.877648	-0.34117
	-1.94149	-1.46767	-1.24492
	-0.934505	-0.600281	-0.714071
	-1.62583	-4.1021	-0.656038
	-0.567694	-1.23126	-2.95485
	-0.716176	-1.46892	-0.599353
	-1.65449	-0.463948	-2.28596
	-0.73806	-0.379525	-0.856838
	-0.852432	-0.477519	-0.962062
	-1.2033	-0.519888	-1.82419
	-1.52544	-0.671376	-2.13774
	-1.42047	-1.14081	-2.46504
	-2.22001	-1.20462	-2.0871
	-2.18117	-0.0877409	-0.715804
	-2.51776	-1.79961	-1.11581
	-1.01452	-1.234	-1.44577
	-1.41373	-0.73285	-1.35962
	-1.9388	-1.33927	-1.7432
	-1.41147	-1.44144	-0.731393
	-2.96556	-1.66493	-0.721098
	-2.94952	-1.34344	-0.356209
	-2.84458	-0.706553	-1.29959
	-0.841231	-1.15119	-0.128381
	-1.65725	-1.72207	-1.35187
	-0.763222	-1.42441	-2.70373
	-1.32677	-0.964109	-1.52047
	-0.571346	-1.92341	-1.80872
	-0.852975	-2.58909	-1.77047
	-2.90302	-1.68456	-0.910112
	-2.51812	-0.0840947	-1.35074
	-0.99016	-3.58689	-1.25279
	-2.2821	-1.57596	-0.293868
	-1.45761	-0.920315	-0.276579
	-1.53133	-1.28942	-1.14421
	-2.28455	-1.6135	-0.598986
	-0.974953	-0.899378	-0.720962
	-2.22034	-1.97678	-0.88288
	-0.783159	-0.782703	-2.21983
	-0.500265	-2.12208	-2.68995
	-0.121183	-1.5703	-0.933258
	-2.35165	-2.25035	-1.62639
	-1.61257	-1.13723	-2.42534
	-2.6973	-1.16034	-0.874538
	-0.179941	-1.54291	-1.42465
	-0.253942	-2.17151	-0.357492
	-0.293732	-0.0982098	-2.39007
	-2.83171	-1.78659	-3.7004
	-2.25671	-0.960384	-0.416123
	-1.39052	-1.29182	-2.28652
	-0.878428	-0.604622	-0.617592
	-1.02798	-2.15708	-0.160726
	-3.32376	-2.48888	-0.722521
	-2.90334	-2.44953	-4.43625
	-1.16427	-1.96996	-2.25306
	-2.18428	-0.634858	-1.26474
	-1.29712	-1.89657	-1.31485
	-1.88077	-0.1291	-3.34103
	-0.768339	-3.56329	-0.332227
	-3.25071	-0.741002	-0.382707
	-2.25385	-1.8379	-0.476928
	-0.932849	-0.61242	-2.31385
	-0.485389	-0.593368	-1.36195
	-1.96902	-1.34651	-0.600809
	-1.58921	-0.865868	-0.646276
	-1.98143	-0.725212	-0.971592
	-3.04529	-1.38187	-1.00541
	-2.05728	-2.01663	-1.95297
	-1.23286	-2.11519	-1.87821
	-0.183662	-1.68085	-1.57637
	-4.27551	-0.0858116	-0.490509
	-1.18717	-0.3888	-0.828206
	-2.05405	-1.58317	-1.41115
	-1.51759	-0.751889	-0.0813609
	-2.92147	-0.725131	-0.468417
	-3.91466	-0.280121	-2.54448
	-1.82082	-0.823713	-1.59164
	-1.23675	-1.48842	-0.158249
	-0.809301	-1.81715	-1.00753
	-0.220608	-1.31406	-1.59838
	-1.34954	-1.50769	-0.900781
	-0.987706	-1.3605	-0.756673
	-3.8389	-1.7088	-0.817635
	-0.906117	-0.981747	-3.40167
	-0.342271	-2.07557	-1.68455
	-0.762717	-1.66005	-0.565196
	-0.392568	-1.78238	-0.617884
	-0.428631	-1.21129	-1.20325
	-0.720176	-0.233229	-1.29186
	-0.110873	-1.31092	-2.18376
	-3.27742	-1.6765	-0.863088
	-3.01334	-1.03951	-1.74491
	-0.437809	-3.37335	-1.12521
	-3.73723	-1.6268	-0.768315
	-1.81109	-0.362066	-3.41138
	-3.10452	-2.93811	-1.3509
	-1.6992	-1.13666	-0.643911
	-4.03516	-0.969898	-2.0383
	-4.72822	-1.48283	-2.32671
	-2.82207	-2.62799	-1.14018
	-2.16728	-0.366103	-1.09703
	-0.398053	-1.46346	-1.26896
	-0.611665	-0.495713	-0.31565
	-0.994956	-1.48808	-1.37883
	-1.26572	-0.329876	-0.704359
	-0.853003	-1.46165	-1.06695
	-0.775956	-2.57289	-1.36617
	-1.0995	-0.949304	-1.84186
	-1.23384	-0.387027	-0.392689
	-0.489113	-1.5661	-1.30476
	-1.12981	-2.00532	-0.807328
	-1.87389	-0.725446	-4.39242
	-0.343259	-4.16913	-0.903898
	-0.427914	-0.853096	-1.15772
	-1.53819	-0.993247	-1.24145
	-1.08878	-2.19934	-1.67699
	-0.341979	-2.2633	-0.394047
	-2.27147	-2.08121	-1.85229
	-1.31717	-1.03322	-2.04991
	-0.456381	-0.366072	-0.940643
	-1.96791	-0.525998	-1.99499
	-2.35174	-1.7391	-2.21649
	-0.396365	-0.22451	-1.86962
	-1.07418	-1.63441	-0.488344
	-1.10027	-0.756271	-2.06252
	-0.152016	-1.29551	-1.46778
	-0.715604	-0.952737	-3.66171
	-1.6989	-2.79571	-1.31269
	-1.84823	-0.952005	-2.5755
	-1.11509	-1.55895	-3.84349
	-1.38296	-0.977868	-0.179389
	-1.9375	-1.28575	-3.37999
	-2.36977	-0.879862	-1.14981
	-1.45486	-2.41331	-1.61663
	-1.98797	-0.463466	-2.06046
	-1.21348	-0.460508	-1.52147
	-0.675555	-0.421678	-0.975601
	-1.75977	-2.11262	-3.32264
	-1.7563	-0.664273	-2.08972
	-1.25281	-1.31843	-1.67206
	-2.0286	-1.09024	-2.68735
	-0.352309	-0.690835	-0.544989
	-0.0876433	-1.68871	-0.597423
	-2.19992	-1.49599	-0.864432
	-0.53806	-2.74872	-2.67578
	-1.63809	-1.62753	-0.592753
	-1.21145	-2.47717	-0.403905
	-1.25451	-0.14746	-0.570239
	-0.850482	-1.13449	-2.13869
	-0.980916	-0.992926	-1.07818
	-3.24954	-1.74105	-1.49829
	-1.01387	-1.27637	-1.89851
	-1.19821	-0.799046	-0.0806376
	-2.08451	-0.397759	-0.344186
	-1.3666	-1.70074	-1.36396
	-1.23872	-2.23333	-0.101674
	-2.81051	-1.42275	-2.46179
	-1.06217	-0.295368	-0.270926
	-3.53026	-2.04003	-0.92929
	-4.00275	-2.29262	-0.745755
	-0.152248	-1.62794	-1.35706
	-0.607884	-1.6957	-2.0816
	-1.31348	-0.954409	-1.48973
	-1.80842	-0.638586	-1.11639
	-1.85071	-1.98931	-1.66998
	-1.18583	-1.6767	-2.84277
	-1.85495	-0.638284	-0.283965
	-0.806068	-1.63013	-0.828082
	-1.9586	-0.492476	-0.437982
	-2.03182	-1.63148	-1.30101
	-1.9138	-1.85894	-1.57206
	-0.388503	-1.66911	-4.73788
	-1.63328	-1.81086	-2.05994
	-1.59052	-1.46768	-0.600361
	-1.22231	-1.66281	-0.884038
	-2.178	-1.28831	-1.27244
	-3.12431	-0.801654	-1.46021
	-2.44423	-1.28283	-0.68109
	-0.0872436	-1.36506	-0.52527
	-1.21133	-1.98493	-0.82033
	-1.138	-0.9575	-1.30775
	-2.83029	-0.721637	-0.772266
	-0.440422	-0.226493	-3.21252
	-0.356571	-0.18069	-0.743681
	-0.0993843	-0.181556	-1.03692
	-0.949739	-1.34153	-1.81565
	-0.378791	-0.85442	-1.28728
	-0.386154	-1.84678	-0.789327
	-2.05947	-1.14303	-2.54915
	-0.349027	-2.08846	-1.7121
	-0.612398	-0.549764	-0.565
	-0.116445	-1.18275	-0.855033
	-3.52802	-1.28085	-0.921894
	-1.37051	-0.336401	-3.76667
	-4.15133	-0.589179	-0.572288
	-4.39213	-1.07331	-0.777327
	-3.02976	-1.07788	-0.451003
	-4.62585	-0.17158	-0.499162
	-3.64458	-1.61854	-1.46984
	-1.64169	-2.03161	-2.45462
	-3.85481	-4.17489	-0.216615
	-3.70051	-0.128253	-1.90824
	-1.45498	-4.81369	-1.39406
	-0.751506	-0.658045	-0.648073
	-0.54029	-0.779164	-1.55487
	-0.852387	-0.975838	-2.11723
	-1.8024	-1.97796	-0.525068
	-0.41363	-2.55351	-1.2799
	-0.528156	-0.37526	-0.469732
	-2.08009	-0.559169	-0.698484
	-2.16086	-0.202732	-1.11868
	-3.18791	-1.02282	-2.30127
	-0.723001	-1.58451	-1.22341
	-1.63864	-0.193848	-0.900858
	-1.7166	-0.242267	-0.958758
	-2.80138	-1.41073	-3.27731
	-1.7509	-1.24133	-2.47731
	-0.0885628	-1.1874	-0.894983
	-1.38288	-2.14097	-2.09075
	-0.633913	-0.971341	-0.625001
	-1.02903	-0.89141	-1.71557
	-1.26141	-1.09385	-0.708544
	-0.563828	-1.10329	-3.52747
	-1.26408	-0.239298	-0.890826
	-0.972635	-0.163527	-0.838949
	-1.80176	-0.249457	-1.95019
	-1.1502	-1.51357	-1.067
	-0.604805	-1.47781	-1.29925
	-1.45197	-3.02122	-0.954689
	-1.18921	-2.28707	-1.27221
	-2.16676	-1.84549	-3.95715
	-1.20539	-0.157678	-0.557175
	-1.63462	-0.677294	-2.83519
	-2.67596	-1.20598	-4.12375
	-2.29231	-0.364105	-0.389466
	-0.666396	-0.470712	-0.662259
	-1.26565	-2.33899	-0.887319
	-1.99913	-1.76769	-4.14808
	-0.882197	-0.368363	-4.47421
	-0.308621	-1.30709	-0.653008
	-2.79588	-2.53506	-1.42395
	-2.22003	-3.7794	-0.489669
	-1.2132	-3.96401	-1.21843
	-1.26363	-1.58107	-2.22363
	-1.32239	-0.840839	-2.21985
	-1.92219	-3.38049	-0.490739
	-1.64138	-2.60955	-1.24122
	-2.36563	-0.438676	-0.860403
	-2.32936	-1.92349	-0.898801
	-0.160349	-1.71999	-2.1852
	-1.75942	-0.48497	-0.381628
	-0.724755	-2.1381	-1.19951
	-0.913137	-2.11659	-0.533056
	-0.710326	-0.631381	-1.77808
	-0.178413	-0.726798	-1.46901
	-1.44308	-0.789904	-0.590455
	-1.01004	-1.80027	-1.03709
	-1.42434	-1.85795	-1.082
	-1.44308	-1.20875	-2.72692
	-1.15454	-0.218581	-0.631804
	-3.09231	-0.20574	-1.20293
	-0.79677	-2.25965	-1.12196
	-0.881108	-4.19497	-1.47525
	-1.42626	-4.34087	-1.75615
	-0.530056	-2.04976	-0.590099
	-1.24781	-1.28621	-0.735015
	-1.63258	-1.17598	-0.836058
	-2.92887	-1.23383	-0.361123
	-0.647225	-0.945077	-0.685991
	-0.379395	-1.58202	-1.65908
	-0.712955	-2.04656	-2.3212
	-2.84151	-1.20555	-0.93883
	-2.27517	-2.63357	-1.18187
	-0.237179	-1.54154	-2.2451
	-1.251	-2.79786	-1.60523
	-2.6108	-4.50305	-1.6615
	-2.65276	-1.01418	-2.00717
	-3.0855	-2.23226	-2.46962
	-2.29652	-0.559237	-1.85881
	-1.34861	-2.28344	-1.60368
	-2.27942	-4.18352	-0.753861
	-3.08558	-0.635717	-1.57376
	-1.74366	-2.21084	-0.427613
	-2.74274	-2.83885	-1.0091
	-1.57424	-1.3403	-1.73866
	-2.48093	-1.69877	-1.71235
	-1.28329	-0.335286	-0.458916
	-2.46944	-0.963432	-2.73435
	-1.40486	-2.02064	-1.84784
	-4.15999	-2.76498	-1.27775
	-4.71889	-0.128739	-3.35429
	-3.33421	-0.265286	-0.876261
	-4.54294	-0.709959	-2.24685
	-3.16038	-1.01779	-3.75385
	-0.212235	-1.83185	-1.88672
	-0.515192	-2.44945	-0.784333
	-2.87308	-1.2098	-2.5894
	-2.48679	-1.48805	-1.13805
	-1.27112	-2.06729	-0.755282
	-1.71786	-1.27381	-0.366047
	-2.90385	-2.75447	-0.42516
	-1.96264	-2.49849	-1.17818
	-1.33151	-1.30985	-1.4425
	-1.06956	-1.92179	-0.233353
	-0.317117	-0.787713	-1.29253
	-1.54892	-0.492268	-0.801878
	-1.45896	-2.05351	-2.28598
	-0.755965	-2.05345	-2.58565
	-0.769369	-4.44904	-0.532909
	-0.205909	-0.654078	-1.41398
	-1.26654	-1.17047	-1.09961
	-1.64343	-1.11902	-1.82468
	-0.685943	-0.740869	-1.51599
	-1.30052	-1.27384	-2.18598
	-0.823476	-1.38775	-1.19578
	-0.19973	-1.57073	-1.05207
	-1.12403	-2.31893	-0.604054
	-1.56239	-2.19385	-1.39182
	-2.13736	-2.4725	-0.504633
	-2.36766	-2.42593	-1.72994
	-0.741141	-1.83832	-0.322924
	-1.17001	-0.325894	-3.60577
	-1.28902	-0.431462	-1.20531
	-0.802159	-2.59625	-0.486412
	-2.06847	-1.33231	-1.35301
	-1.60098	-2.13176	-2.29458
	-2.23629	-1.90624	-1.19286
	-4.59245	-1.23481	-0.172024
	-1.55366	-2.62385	-2.05457
	-0.546967	-2.88115	-1.13629
	-0.495403	-0.3365	-0.924888
	-0.384136	-0.828239	-1.26578
	-1.76915	-0.994514	-0.171622
	-0.589887	-1.22285	-1.12285
	-0.662149	-0.843769	-0.220949
	-1.2982	-2.47885	-1.0801
	-1.05251	-2.20495	-0.284834
	-1.57357	-1.35638	-1.31485
	-0.385987	-1.10712	-0.932905
	-2.08312	-2.14203	-1.9878
	-1.92026	-1.02273	-3.04047
	-1.36775	-1.26483	-1.78617
	-1.89137	-3.92941	-0.284291
	-1.8058	-2.08552	-1.0284
	-2.88256	-0.58268	-0.58368
	-0.255647	-0.363063	-0.465017
	-1.36763	-3.33183	-1.02832
	-3.78846	-4.00611	-1.325
	-3.27145	-1.23303	-1.15649
	-1.58673	-1.37465	-1.30252
	-0.646851	-2.22879	-1.74483
	-0.903665	-0.331596	-1.82199
	-2.05859	-1.60813	-1.34514
	-1.12882	-1.62957	-1.02434
	-0.772598	-1.77112	-1.09854
	-0.640577	-1.94872	-0.75629
	-2.13077	-0.395691	-0.582432
	-0.798647	-1.07831	-2.47593
	-0.299063	-1.20733	-1.79922
	-0.966941	-1.90361	-0.504785
	-1.38379	-0.47309	-0.313244
	-1.26542	-0.169162	-2.60075
	-1.86935	-0.529646	-1.98207
	-1.93834	-0.918409	-3.02224
	-2.05728	-1.8509	-1.30053
	-0.452255	-0.636997	-0.920106
	-2.19444	-0.478982	-1.33145
	-1.02068	-0.41495	-0.131491
	-2.59275	-0.644972	-2.91141
	-0.152067	-0.818095	-2.08007
	-1.30743	-1.95517	-1.30945
	-2.10692	-0.203728	-0.85362
	-0.478564	-0.744551	-0.123177
	-1.61658	-0.384903	-0.117237
	-1.57845	-0.294705	-1.75223
	-2.92312	-0.198923	-3.08889
	-2.09138	-1.33731	-0.571699
	-2.46897	-0.919416	-0.313378
	-2.79655	-0.904683	-0.733661
	-1.76611	-2.14578	-0.0913616
	-1.86233	-0.500297	-1.23602
	-0.762666	-0.875601	-1.73303
	-1.75161	-0.403915	-1.59754
	-0.514359	-0.467875	-0.71703
	-1.46311	-1.57646	-0.357696
	-1.44634	-1.13947	-0.667765
	-0.667853	-1.60466	-0.691958
	-0.641341	-0.516505	-0.881108
	-1.57466	-0.924053	-0.850836
	-0.455202	-0.093165	-2.36885
	-0.651392	-1.41508	-0.593546
	-1.49309	-0.528291	-0.95805
	-0.879112	-1.50924	-2.79125
	-1.10584	-0.471354	-1.30198
	-0.226417	-1.38286	-3.01445
	-1.90452	-0.998183	-1.87106
	-0.842629	-1.20703	-0.446997
	-1.67951	-0.840363	-1.97402
	-1.21273	-0.734281	-1.85385
	-1.20466	-2.78897	-1.91938
	-1.54304	-0.728723	-1.41014
	-1.24305	-1.70648	-4.26014
	-0.924944	-2.24183	-3.38407
	-0.960103	-0.529175	-0.381227
	-1.5618	-2.01846	-1.23901
	-1.98194	-2.3522	-2.0291
	-1.08411	-1.67707	-1.35763
	-0.829135	-2.64629	-1.27026
	-0.216767	-2.09897	-0.844039
	-0.454557	-2.85464	-1.19235
	-1.48555	-2.68879	-1.12027
	-0.78495	-1.27453	-1.16284
	-0.573077	-2.11126	-1.15865
	-1.4931	-1.97973	-0.795494
	-2.26378	-3.89588	-0.88228
	-1.9122	-3.47332	-1.71648
	-1.13417	-1.19286	-1.32979
	-2.02424	-1.21782	-1.13331
	-1.84136	-1.42754	-0.869806
	-0.462998	-1.16512	-0.15036
	-0.905259	-1.58234	-1.258
	-0.87724	-1.1367	-1.01429
	-0.413228	-0.579231	-2.25941
	-1.28625	-1.77444	-0.902089
	-1.13356	-4.27618	-0.978204
	-0.564905	-2.97629	-0.959285
	-2.17733	-1.78436	-0.877696
	-3.92832	-0.386541	-1.06874
	-3.5311	-0.691209	-0.22844
	-4.80921	-2.1653	-1.53498
	-2.49863	-1.64319	-0.729882
	-2.17201	-1.45822	-2.05962
	-1.60043	-2.37207	-0.171646
	-0.584453	-1.94897	-1.26811
	-0.883281	-1.90937	-1.20126
	-3.3315	-1.70955	-0.706345
	-1.38695	-2.07621	-0.536294
	-2.06551	-1.32349	-1.99262
	-2.90861	-0.309039	-0.560157
	-1.63819	-0.860003	-2.0044
	-0.879882	-0.990372	-1.27365
	-0.853291	-1.82263	-2.13616
	-1.69121	-0.560322	-0.432326
	-1.80304	-2.22055	-1.05387
	-0.887994	-1.12296	-0.205137
	-0.945079	-1.5196	-1.49258
	-1.1364	-0.906868	-0.706249
	-1.11394	-0.763384	-1.32842
	-0.462875	-1.84741	-1.77006
	-3.30111	-0.10575	-0.724486
	-1.74658	-1.38247	-2.88462
	-1.98911	-1.55604	-2.40374
	-1.92278	-1.71447	-0.442526
	-1.64923	-1.97396	-1.46515
	-2.06154	-1.67943	-1.20192
	-0.892178	-1.62593	-3.41836
	-2.8024	-0.182524	-0.076982
	-0.458103	-3.53164	-0.600711
	-0.884676	-1.89402	-0.686802
	-0.937631	-0.784904	-0.915451
	-2.71436	-1.84576	-0.441736
	-0.885004	-1.42849	-3.40206
	-0.760082	-0.252555	-0.287827
	-1.45596	-2.96462	-1.27289
	-1.14929	-0.407192	-0.443548
	-0.799507	-0.517815	-0.183146
	-2.09375	-1.6055	-1.11644
	-1.23553	-1.11365	-1.40988
	-2.62378	-0.993635	-0.519248
	-0.709491	-0.789774	-0.152465
	-1.19476	-0.951697	-0.473131
	-1.71795	-1.85695	-0.345367
	-0.897862	-2.48659	-0.620335
	-1.81937	-0.654878	-0.689951
	-0.438456	-1.78566	-0.827203
	-2.38908	-1.24183	-1.40083
	-0.398369	-0.919245	-2.54139
	-2.93044	-1.16426	-1.58751
	-0.814744	-0.30905	-0.972911
	-0.291792	-1.40395	-1.31542
	-0.956417	-1.34803	-2.17447
	-1.81984	-2.52579	-0.0896321
	-0.620147	-0.327549	-1.03246
	-0.851035	-1.93666	-0.777202
	-0.311219	-0.740283	-1.38909
	-1.53111	-2.08529	-2.68684
	-0.919967	-1.6214	-0.772882
	-1.73246	-1.36528	-3.02033
	-2.89755	-1.14525	-2.01981
	-1.73191	-1.45637	-0.198385
	-0.234794	-0.76233	-2.64893
	-0.520666	-1.1403	-2.73107
	-0.811741	-1.32522	-1.40808
	-1.25739	-1.4974	-1.52369
	-0.323718	-0.14247	-1.30974
	-1.71362	-1.21555	-1.22462
	-0.932119	-1.01709	-1.56538
	-1.17875	-1.40929	-2.26396
	-0.84018	-2.08502	-0.928439
	-1.51718	-2.3246	-1.7274
	-2.33601	-0.116735	-1.21864
	-0.202207	-1.26527	-1.91618
	-1.76979	-0.95727	-1.19162
	-0.220413	-0.490415	-1.31085
	-1.53509	-1.41603	-3.62425
	-1.10256	-3.13864	-3.14444
	-2.48785	-1.50187	-0.952637
	-0.650449	-0.675751	-1.92186
	-2.19548	-1.78865	-0.143143
	-0.109713	-1.39885	-1.87378
	-0.809452	-1.48455	-3.3706
	-0.644459	-2.26423	-0.150697
	-0.0847169	-1.70648	-3.77772
	-1.86346	-2.19071	-1.52246
	-2.42646	-1.50675	-0.419435
	-0.390433	-1.64685	-0.699687
	-1.86941	-2.66833	-1.35929
	-1.24085	-1.5587	-1.58624
	-0.66116	-2.65847	-1.42779
	-2.4562	-2.72463	-1.40901
	-0.794979	-2.27388	-4.64907
	-2.55546	-2.50296	-3.56949
	-2.46031	-1.32143	-0.432844
	-1.28876	-0.850922	-0.771344
	-4.14945	-1.15398	-2.81071
	-2.4697	-0.50031	-0.573279
	-1.75742	-2.61385	-0.243401
	-3.07548	-2.50069	-0.50905
	-3.46779	-1.41104	-3.08012
	-1.68779	-0.764945	-0.752043
	-1.39451	-4.01146	-1.41542
	-0.241317	-0.191169	-2.17058
	-2.30202	-1.42896	-3.65962
	-1.10489	-0.640707	-2.73835
	-1.42365	-1.7652	-2.61492
	-1.59349	-0.952024	-1.15567
	-2.25614	-1.62835	-0.998726
	-0.604463	-0.475515	-1.48564
	-0.0934714	-0.53808	-1.5961
	-0.614035	-0.736905	-0.845734
	-0.866662	-2.18569	-1.35852
	-4.77345	-0.45106	-1.41581
	-3.32002	-0.37294	-0.807632
	-0.536393	-0.806764	-2.05564
	-0.926385	-1.45554	-2.91944
	-0.411093	-1.79473	-3.17679
	-0.971567	-0.74971	-0.882089
	-1.70149	-2.87493	-0.563661
	-3.12218	-0.325686	-1.19003
	-1.14797	-1.49145	-1.49646
	-3.55348	-1.629	-0.665563
	-2.06943	-0.268533	-0.256323
	-2.47031	-2.87591	-1.73222
	-2.63492	-2.81189	-1.4546
	-0.475	-0.186268	-0.512468
	-0.725649	-0.746938	-0.949509
	-0.127271	-2.03333	-1.71011
	-0.630791	-1.44703	-1.08895
	-1.64817	-1.64345	-1.03699
	-0.650024	-0.687347	-0.333544
	-0.715625	-2.77589	-3.31293
	-0.648785	-1.45359	-3.78354
	-0.465832	-2.31987	-1.10107
	-0.553156	-0.867507	-2.10897
	-0.512949	-1.27367	-1.29012
	-1.50027	-0.854449	-0.436139
	-1.19454	-1.3866	-0.22172
	-1.37303	-1.69571	-3.01353
	-0.909672	-0.942081	-1.09456
	-1.61383	-0.961346	-2.63366
	-0.380726	-0.861116	-1.56258
	-1.2621	-1.9215	-1.39241
	-1.25863	-1.39192	-2.27905
	-1.54047	-0.741066	-1.50592
	-2.5828	-1.79773	-1.0752
	-1.39609	-0.392784	-1.2435
	-1.58212	-0.976742	-1.79607
	-0.838459	-0.987152	-0.626869
	-2.30722	-1.32563	-1.09219
	-0.745498	-0.846943	-1.95671
	-0.29605	-0.943932	-2.3372
	-1.63303	-0.346818	-0.381942
	-1.22454	-0.675627	-2.71071
	-0.928239	-0.246566	-0.663096
	-0.827171	-2.10245	-1.07423
	-1.79386	-0.939065	-2.83346
	-1.93659	-0.997856	-0.840698
	-2.59293	-1.33017	-0.358361
	-0.762278	-1.72867	-1.72997
	-0.36503	-2.42047	-1.14966
	-2.14209	-1.51522	-1.88562
	-0.171228	-2.51036	-0.854157
	-1.34657	-2.33926	-0.257179
	-0.411661	-3.19786	-0.195209
	-2.52842	-0.683937	-0.385777
	-1.71063	-2.28916	-0.280372
	-1.57866	-0.966739	-0.46667
	-1.40823	-1.05767	-0.946435
	-1.70315	-1.03485	-0.838151
	-0.933971	-1.31686	-0.924305
	-0.787218	-0.768435	-1.14203
	-2.62749	-2.76044	-1.33779
	-3.14925	-0.182453	-1.4405
	-2.01113	-0.440471	-0.592477
	-3.275	-2.39814	-0.435298
	-1.19576	-2.69379	-2.22074
	-2.09387	-0.948195	-1.99004
	-2.42184	-3.5528	-1.5755
	-0.171254	-1.92837	-2.85913
	-0.489246	-1.02843	-0.871211
	-1.87614	-1.80252	-1.80924
	-2.69312	-1.12906	-2.63302
	-2.6658	-1.03474	-0.815026
	-0.76513	-2.8528	-0.504017
	-1.39005	-2.41555	-0.186958
	-1.26096	-2.07206	-1.74472
	-0.228905	-1.17955	-1.07296
	-2.21192	-0.147562	-0.223282
	-3.69377	-2.23344	-0.882582
	-3.3587	-1.3315	-1.56344
	-1.64255	-1.72224	-1.16742
	-1.04855	-1.96278	-0.486555
	-4.25724	-2.97834	-2.21435
	-0.676851	-2.46994	-1.69808
	-0.117625	-2.41564	-0.947401
	-0.383541	-1.73813	-2.95227
	-2.47192	-0.0882166	-0.405396
	-0.864555	-3.27957	-1.5964
	-1.92179	-0.292312	-0.540615
	-0.629064	-2.27439	-1.61378
	-0.747552	-2.03794	-1.41704
	-1.96656	-3.08671	-1.68404
	-1.3492	-0.936848	-0.31112
	-1.17376	-3.29242	-0.762234
	-0.961061	-1.74592	-1.04955
	-0.0984452	-2.5027	-1.75833
	-0.542684	-2.43603	-1.39016
	-1.74131	-0.489972	-0.90407
	-1.18649	-0.735012	-3.34502
	-0.989182	-0.543931	-1.99996
	-1.03497	-0.29021	-1.31891
	-1.31389	-0.108295	-0.448669
	-0.709603	-0.685582	-1.37454
	-1.96835	-2.30753	-0.843893
	-1.6118	-2.69293	-0.302555
	-0.115543	-0.137111	-0.552768
	-0.140988	-2.80265	-1.80599
	-1.65938	-0.972316	-2.77441
	-0.741375	-1.11071	-2.05843
	-2.11984	-0.439287	-1.00351
	-1.87592	-1.11961	-2.98956
	-1.83031	-1.03263	-2.67603
	-0.623408	-0.35586	-1.5168
	-0.437041	-2.60357	-0.257179
	-0.12636	-1.49164	-1.32754
	-1.14171	-1.65608	-0.32573
	-1.73225	-1.86003	-0.181305
	-1.31731	-2.916	-1.47033
	-0.967976	-1.75401	-1.43359
	-0.54833	-1.27944	-0.338329
	-2.76494	-1.84111	-2.3608
	-1.50898	-3.15917	-1.90117
	-0.198531	-0.842743	-1.61538
	-0.96572	-1.74171	-0.359471
	-0.754662	-1.02807	-1.99903
	-3.0536	-0.681087	-1.64651
	-2.94399	-1.56764	-0.771822
	-0.705776	-1.86525	-1.02849
	-0.359474	-3.03333	-1.07791
	-1.25379	-0.336046	-2.20522
	-3.30733	-1.9441	-0.800427
	-0.312055	-1.24661	-0.543434
	-1.84351	-0.882175	-2.13618
	-2.40609	-2.1268	-0.487673
	-2.10923	-1.1291	-1.78887
	-1.39044	-1.1786	-0.15185
	-2.1568	-0.498738	-1.87014
	-1.51953	-1.53552	-1.26981
	-3.26652	-0.942755	-0.503846
	-0.812992	-1.70357	-1.5255
	-2.75769	-1.69885	-4.24856
	-2.70252	-0.911879	-1.40519
	-2.42432	-1.71728	-2.66572
	-0.87979	-1.14103	-0.427006
	-2.70085	-2.04147	-1.02996
	-0.282579	-0.323166	-1.84893
	-0.344417	-2.02308	-3.12417
	-4.34843	-1.8932	-1.51781
	-3.52912	-0.886351	-0.92922
	-2.0537	-1.15285	-2.39134
	-3.93264	-1.98006	-0.26795
	-1.41976	-0.420586	-1.39344
	-2.37063	-0.316229	-2.52296
	-1.17294	-1.77454	-3.86231
	-0.857809	-3.00116	-3.45769
	-0.550199	-1.81405	-1.84255
	-3.52912	-0.259591	-1.17237
	-3.41653	-1.59076	-0.583727
	-0.860593	-1.6106	-2.88765
	-0.396715	-1.89171	-1.14707
	-1.56343	-1.81162	-3.9059
	-2.6256	-0.282051	-2.92544
	-4.06326	-0.269433	-0.821084
	-2.96834	-1.96256	-1.88599
	-1.41521	-0.418918	-0.148428
		-1.73041	-0.860214
		-1.06875	-1.01449
		-1.68438	-2.70897
		-1.60104	-3.95666
		-1.16362	-1.20019
		-1.12634	-1.56705
		-1.35049	-3.21811
		-0.793531	-2.79905
		-0.641743	-0.840705
		-1.45044	-1.0528
		-0.280645	-0.481556
		-0.935617	-0.829905
		-1.04732	-2.49342
		-1.22534	-0.588635
		-1.56538	-1.18077
		-0.220234	-1.69423
		-0.326109	-0.402976
		-0.565724	-2.51631
		-0.665052	-0.514672
		-1.27552	-0.748613
		-1.01535	-2.63583
		-1.09313	-2.76857
		-1.27995	-2.34381
		-2.55309	-2.96365
		-2.59865	-2.61531
		-2.02717	-0.382837
		-0.806987	-3.20302
		-1.25992	-1.1597
		-0.137491	-0.797456
		-0.297395	-0.216662
		-2.05457	-4.32962
		-1.0317	-1.39343
		-0.828609	-1.44231
		-0.258145	-0.263984
		-2.05362	-0.62935
		-2.22881	-2.52516
		-1.57952	-1.75895
		-1.62375	-0.828271
		-2.07514	-1.89554
		-1.64656	-1.52177
		-0.959337	-1.15995
		-1.34155	-1.03232
		-1.22983	-1.0404
		-1.92135	-4.02889
		-1.62319	-4.05179
		-0.345823	-2.94988
		-0.740789	-0.699546
		-2.60962	-0.700874
		-2.251	-2.48942
		-1.52468	-0.958785
		-1.18478	-2.04507
		-1.02286	-2.4685
		-1.40479	-2.46475
		-0.266056	-1.72293
		-1.87938	-0.855938
		-0.689057	-1.21017
		-0.320813	-2.51206
		-2.12047	-0.274982
		-0.457057	-0.591168
		-0.229934	-1.38488
		-3.93714	-1.02979
		-0.273993	-1.39491
		-0.175155	-1.19238
		-3.14744	-1.31462
		-0.341281	-0.320669
		-0.542148	-0.310512
		-0.776626	-0.381456
		-1.90232	-2.00447
		-1.30664	-0.437144
		-1.66315	-1.59452
		-0.728314	-3.35903
		-1.66091	-2.26625
		-0.861329	-1.73077
		-0.49612	-1.31962
		-1.21915	-3.30662
		-0.8046	-2.77408
		-1.65406	-0.925406
		-0.678767	-0.871638
		-0.600796	-0.571728
		-1.24018	-1.0283
		-0.104074	-1.85435
		-2.11531	-1.41256
		-2.2022	-0.799042
		-4.34793	-0.214691
		-1.33604	-4.18513
		-1.00869	-0.20566
		-0.497978	-0.30181
		-1.11056	-0.612923
		-1.72315	-0.25932
		-0.18432	-0.884557
		-1.13795	-1.13587
		-1.01504	-0.643107
		-1.07585	-0.949135
		-0.366183	-0.120636
		-2.59585	-0.92168
		-0.753216	-1.79223
		-1.167	-0.172745
		-1.4692	-3.20737
		-1.45002	-1.60669
		-0.514983	-0.737336
		-1.42381	-2.45063
		-0.704813	-0.732967
		-0.253734	-0.276326
		-1.58045	-0.662905
		-1.2203	-0.547408
		-0.581514	-1.25731
		-1.80669	-1.07457
		-0.182243	-2.09642
		-2.2105	-0.731847
		-0.147049	-0.536816
		-0.343687	-2.42579
		-1.38945	-0.717388
		-1.75499	-0.275561
		-1.50676	-3.82059
		-0.932551	-0.277529
		-0.595431	-0.140912
		-0.511552	-1.86234
		-0.559576	-0.37135
		-1.57955	-1.10624
		-1.11596	-0.988781
		-2.00607	-1.05206
		-2.06019	-3.11827
		-0.598197	-1.09266
		-0.229965	-2.28894
		-1.47714	-0.523003
		-2.70707	-2.06324
		-1.05332	-0.411992
		-2.36601	-1.03173
		-1.03157	-2.19783
		-0.149834	-2.06324
		-1.55689	-1.83009
		-2.36267	-1.54924
		-1.71098	-1.36164
		-1.26182	-0.600531
		-1.43999	-2.48937
		-2.87062	-0.497259
		-3.01205	-0.448815
		-1.15143	-2.00616
		-1.66117	-1.51388
		-1.8203	-2.47949
		-2.12801	-2.88743
		-0.371161	-0.882175
		-1.87337	-0.540103
		-0.454632	-1.65621
		-2.56288	-0.924693
		-3.33981	-0.0888544
		-2.89241	-2.52627
		-2.59498	-1.3563
		-1.57708	-0.987429
		-1.66228	-4.20333
		-3.60159	-0.770623
		-2.05804	-0.652919
		-1.40615	-0.728999
		-2.84961	-1.15215
		-3.08707	-1.47177
		-0.789714	-2.44958
		-0.758218	-2.42038
		-3.00364	-3.77654
		-1.46393	-1.85905
		-1.6739	-2.08555
		-0.23314	-0.13735
		-1.07683	-1.5005
		-1.28407	-0.425893
		-0.475735	-1.02838
		-1.65614	-1.59352
		-0.795758	-1.79195
		-0.35257	-2.23125
		-1.10493	-2.01118
		-2.9933	-0.414146
		-0.719953	-1.96836
		-1.35503	-2.06084
		-0.558024	-1.66497
		-0.312985	-0.614026
		-1.4677	-2.36731
		-1.09727	-0.837716
		-0.714922	-2.46788
		-2.05063	-1.34598
		-1.70453	-0.606118
		-1.87191	-0.626934
		-1.7315	-1.40695
		-0.604193	-0.608292
		-0.476992	-1.65966
		-2.00213	-2.9792
		-2.42335	-1.95168
		-1.18548	-1.97403
		-1.73874	-2.51822
		-1.27914	-1.2414
		-1.30681	-1.29996
		-1.2732	-0.992645
		-1.30675	-2.3533
		-0.152403	-0.931186
		-0.614549	-0.317833
		-0.983278	-2.7397
		-0.644617	-1.11912
		-1.68068	-2.02926
		-1.40594	-2.29936
		-0.569422	-0.485962
		-2.05595	-0.281146
		-1.89778	-0.45429
		-0.22366	-2.75221
		-1.34299	-3.57784
		-2.68598	-1.7076
		-2.17341	-0.295198
		-1.53408	-0.167837
		-2.62707	-1.50083
		-0.660934	-1.71871
		-1.88815	-1.6184
		-3.6278	-0.250527
		-0.143205	-1.76796
		-0.137675	-1.117
		-1.26847	-1.43349
		-0.70185	-0.228527
		-1.28729	-1.68655
		-3.31557	-0.706006
		-2.45752	-1.7314
		-0.771487	-1.11327
		-0.90451	-0.239515
		-1.48902	-1.17731
		-1.40549	-0.547323
		-0.516248	-1.49937
		-1.67477	-1.03077
		-2.67093	-0.664273
		-2.39623	-0.659402
		-3.22911	-1.13872
		-3.08985	-0.631212
		-1.91067	-0.626546
		-1.13308	-2.21625
		-2.70367	-0.972698
		-0.0792625	-2.65813
		-0.895128	-3.3926
		-0.514335	-0.92389
		-2.34769	-2.43073
		-3.73015	-0.825936
		-2.25555	-1.061
		-0.834453	-1.59196
		-0.0788532	-1.17535
		-3.42163	-2.8614
		-0.634089	-1.46246
		-1.78957	-0.210229
		-0.128615	-2.49793
		-0.658604	-3.48354
		-2.40808	-3.88923
		-2.36122	-3.99689
		-1.27152	-2.93974
		-1.53354	-0.276897
		-1.70966	-0.955426
		-2.00129	-2.28149
		-4.85128	-3.65833
		-0.985686	-0.892848
		-2.02351	-0.808942
		-2.89815	-1.56904
		-1.10292	-1.14697
		-0.294767	-0.963726
		-2.57343	-1.55765
		-2.76173	-0.110137
		-0.704298	-3.5316
		-0.285076	-1.09891
		-2.6097	-1.2456
		-1.57594	-1.9809
		-1.0289	-0.807098
		-0.0934593	-1.90519
		-1.68592	-0.45161
		-0.785577	-2.52129
		-2.19786	-2.52205
		-1.97613	-0.889688
		-0.255024	-0.0944248
		-1.11567	-1.9503
		-1.97923	-0.727433
		-0.775697	-2.00466
		-1.48104	-2.77492
		-2.95594	-2.5
		-2.39553	-1.90881
		-0.0836465	-0.734959
		-2.96912	-3.21554
		-1.66115	-3.07468
		-0.954574	-3.35099
		-0.147027	-3.19192
		-0.681408	-2.1898
		-0.540797	-0.159691
		-0.366147	-1.94201
		-2.11929	-2.44108
		-0.518043	-2.71646
		-1.90783	-0.72933
		-0.545993	-0.480336
		-2.8328	-1.73553
		-1.44452	-2.25648
		-0.743964	-0.0811841
		-1.94714	-2.30907
		-2.00597	-2.62817
		-1.08433	-3.21548
		-1.78217	-0.19556
		-0.686736	-3.27987
		-0.851274	-1.45184
		-0.939313	-0.779526
		-0.657837	-2.3697
		-1.43425	-1.6357
		-1.26894	-0.576923
		-2.01923	-0.18685
		-1.56064	-1.4676
		-1.19154	-1.86719
		-4.13993	-1.68437
		-0.913386	-1.84588
		-3.38942	-0.246709
		-1.34738	-0.150509
		-2.28152	-0.344053
		-2.22302	-2.068
		-3.35351	-1.62316
		-1.51408	-2.4112
		-1.76429	-0.746083
		-1.88549	-2.37189
		-2.2117	-1.53487
		-2.30618	-1.86023
		-2.73269	-0.170883
		-0.615999	-1.91429
		-2.39974	-0.845353
		-3.04715	-4.00572
		-2.8049	-2.36749
		-1.26578	-1.23333
		-0.851487	-0.350113
		-0.62019	-1.76022
		-0.917672	-0.67501
		-1.25418	-0.494242
		-1.5287	-1.09214
		-2.97877	-0.387399
		-2.28218	-1.19327
		-1.19302	-0.588256
		-1.79625	-1.13903
		-1.88629	-0.39708
		-1.48205	-1.46941
		-0.752391	-0.971251
		-0.608651	-0.635507
		-0.685853	-0.178569
		-0.197539	-2.74213
		-0.997466	-1.4706
		-1.50859	-1.54392
		-1.02713	-2.00466
		-0.725363	-1.41068
		-2.08711	-0.202074
		-1.31689	-0.133566
		-0.468855	-0.564412
		-3.47356	-1.01701
		-0.34294	-0.735275
		-2.43846	-2.23283
		-1.03044	-0.207869
		-2.45814	-1.02438
		-0.463242	-0.841958
		-0.797109	-0.620412
		-1.35317	-1.95325
		-1.93885	-0.358371
		-2.60463	-2.67712
		-3.32475	-0.702608
		-2.62096	-0.387125
		-1.69269	-0.799507
		-1.34775	-0.455634
		-1.19449	-0.367115
		-1.33619	-0.423192
		-0.637997	-0.257309
		-1.09364
		-0.113547
		-0.419163
		-1.73555
		-1.88605
		-0.629503
		-1.294
		-1.16841
		-1.99645
		-1.17193
		-1.23029
		-3.36183
		-1.36005
		-1.2739
		-0.902024
		-0.832643
		-1.93249
		-2.42083
		-2.15944
		-0.47245
		-2.17062
		-1.90835
		-3.54601
		-2.18821
		-2.21346
		-2.30124
		-1.69563
		-1.45225
		-0.836361
		-0.680963
		-3.08834
		-1.17278
		-1.25005
		-0.329567
		-0.496856
		-0.269291
		-0.427205
		-0.352937
		-1.28683
		-0.996058
		-0.47369
		-2.32969
		-1.65295
		-0.305613
		-0.711736
		-0.635754
		-1.86871
		-1.65314
		-0.187472
		-1.21969
		-1.9647
		-1.66257
		-2.58211
		-2.31877
		-0.379524
		-0.171646
		-1.73407
		-2.12712
		-0.604996
		-0.217814
		-1.01722
		-0.645843
		-0.343326
		-0.143323
		-1.259
		-0.7873
		-0.499328
		-2.34111
		-0.95182
		-1.41893
		-3.28388
		-2.24328
		-1.03295
		-2.81676
		-2.15198
		-1.5904
		-4.28825
		-1.02917
		-2.66661
		-3.58077
		-1.7169
		-3.23462
		-2.1667
		-1.77694
		-0.693922
		-1.38455
		-2.42587
		-1.3465
		-0.942891
		-0.0786127
		-2.86029
		-1.7487
		-2.26403
		-3.37318
		-1.6511
		-1.36356
		-0.436153
		-1.74709
		-1.44117
		-1.70666
		-1.95594
		-1.91811
		-1.62745
		-0.584899
		-1.31248
		-1.37047
		-0.781618
		-1.65488
		-1.14476
		-1.20904
		-1.89256
		-1.02897
		-1.17601
		-0.915038
		-0.433673
		-2.47289
		-3.05385
		-2.21356
		-2.71993
		-1.62325
		-1.06192
		-2.50221
		-2.58128
		-1.86315
		-4.22952
		-0.265969
		-0.787992
		-0.258194
		-1.6799
		-0.52669
		-0.217386
		-0.849749
		-3.50301
		-1.39378
		-0.570112
		-1.27995
		-0.22444
		-0.714117
		-1.21934
		-1.7168
		-2.48964
		-0.977569
		-1.45829
		-0.633974
		-1.15991
		-0.925079
		-0.77227
		-0.966819
		-1.29118
		-0.721154
		-1.70179
		-1.38996
		-1.57374
		-1.15283
		-1.95354
		-2.9703
		-0.279131
		-0.342496
		-1.0364
		-0.226543
		-1.6465
		-3.1315
		-0.629956
		-0.626783
		-1.24648
		-0.433357
		-1.60008
		-0.886568
		-0.77121
		-1.44785
		-0.79113
		-0.396052
		-2.16459
		-1.19748
		-1.20184
		-1.50932
		-0.550686
		-2.58927
