# Supplementary material for: Huntingtin recruits KIF1A to transport synaptic vesicle precursors along the mouse axon to support synaptic transmission and motor skill learning
Source: eLife. 2023 Jul 11;12:e81011. doi: 10.7554/eLife.81011 (PMC10365837; doi:10.7554/eLife.81011)
Supplement: Figure 1—source data 3. [file elife-81011-fig1-data3.xlsx]

## Sheet: Figure 1b-Net flux
	Wild-type	HTT-SD	HTT-SA
	2.35	7.26	6.4
	8.14	17.44	6.65
	7.46	26.11	-12.36
	18.53	4.16	14.14
	8.02	14.53	2.31
	-5.8	-7.43	7.18
	-3.73	8.52	-7.79
	4.01	11.52	2.09
	1.66	10.69	1.07
	3.16	4.44	11.05
	2.69	7.14	-10.11
	10.24	5.75	0.67
	0.65	0.01	11.55
	19.77	3.78	-4.33
	8.9	2.71	8.84
	6.25	21.14	-2.86
	3.49	0.05	-0.95
	4.91	0.01	5.47
	25.94	11.96	6.73
	-30.61	4.99	-5.76
	3.36	3.91	-7.36
	-11.68	10.15	5.86
	22.22	-2.38	-1.25
	4.46	3.67	2.85
	-1.99	5.15	-5.1
	0.31	6.45	2.22
	9.09	4.99	1.75
	6.28	5.89	9.47
	22.81	14.5	10.36
	-7.71	-3.2	2.27
	-12.18	31.55	10.73
	28.59	18.52	-2.17
	0.6	3.41	19.16
	4.39	5.31	21.41
	12.26	14.92	0.21
	-3.87	6.72	7.96
	-6.24	5.39	16.7
	2.22	-5.05	9.56
	-12.17	8.03	0.46
	11.76	5.14	-3.63
	2.56	1.17	-1.39
	-1.53	1.03	-0.67
	14.53	-2.01	0.33
	-0.84	-4.27	13.48
	15.49	33.08	1.2
	-8.88	28.42	9.33
	-0.79	11.56	-8.5
	1.6	9.06	11.95
	9.59	25.58	8.36
	12.58	11.75	7.96
	16.13	3.69	8.74
	18.79	5.87	-9.5
	21.01	13.36	5.38
	18.22	18.63	1.56
	2.84	9.95	6.91
	5.26	1.39	5.56
	4.24	5.16	-2.66
	10.35	-1.62	6.07
	3.06	1.18	9.29
	-9.76	1.98	6.22
	0.28	4.01	4.85
	10.33	41.4	6.54
	8.47	11.25	6.05
	-3.89	25.03	-2.75
	-10.56	11.32	-4.37
	-7.74	7.46	23.29
	13.84	2.93	2.87
	20.01	7.52	0.36
	-2.49	7.57	-3.86
	-2.55	6.15	9.25
	0.34	10.14	-5.94
	2.24	19.78	8.53
	-0.41	8.51	2.49
	1.57	19.21	6.21
	-11.61	13.96	8.01
	1.73	21.22	3.62
	-3.73	8.61	8.69
	-4.76	11.95	4.05
	12.08	24.25	7.74
	-2.37	22.45	0.16
	5.81	30.1	-16.48
	3.88	28.22	4.85
	-3.86	3.47	-3.73
	-1.89	11.61	2.02
	-10.46	2.62	3.91
	8.64	33.47	-8.7
	6.4	9.09	4.67
	7.81	0.32	-1.34
	7.78	6.83	7.42
	-16.46	-7.47	7.63
	5.7	7.79	10.39
	0.84	0.82	20.27
	-9.86	27.16	5.1
	9.67	20.18	-1.96
	7.27	9.5	-4.17
	12.39	17.35	5.33
	27.59	16.46	-2.18
	1.09	12.24	6.33
	25.99	11.25	10.65
	11.62	12.38	-6.06
	-19.53	13.32	9.99
	2.88	6.91	9.27
	12.39	0.98	15.13
	-9.2	2.57	1.38
	1.79	-1.37	-8.45
	17.32	20.46	-0.34
	7.18	-7.68	19.6
	30.18	30.42	19.01
	27.79	21.17	8.8
	5.45	15.83	-6.17
	10.44	10.25	4.24
	7.61	3.26	1.2
	-3.19	13.35	2.78
	1.91	17.17	-4.45
	11.67	3.23	1.33
	-9.07	15.06	7.13
	11.92	19.31	6.17
	7.33	10.25	5.23
		6.66	7.48
		19.22	7.63
		-2.58	5.82
		13.35	15.12
		14.35	5.35
		4.15	13.13
		5.78	9.03
		3.48	3.34
		0.85	15.63
		15.27	2.09
		18.97	17.54
		9.16	5.24
		8.65	-7.28
		11.16	18.51
		30.49
		25.8
		7.29
		-1.93
		9.26
		13.47
		20.62
		11.91
		10.84
		18.4
		32.66
		20.79
		7.17
		10.45
		18.55
		44.6
		-2.86
		-3.03
		1.53
		21.46
		19
		9.37
		1.71
		5.92
		11.27
