# Supplementary material for: Huntingtin recruits KIF1A to transport synaptic vesicle precursors along the mouse axon to support synaptic transmission and motor skill learning
Source: eLife. 2023 Jul 11;12:e81011. doi: 10.7554/eLife.81011 (PMC10365837; doi:10.7554/eLife.81011)
Supplement: Figure 1—source data 4. [file elife-81011-fig1-data4.xlsx]

## Sheet: Figure 1c-VGLUT1 pHluorin
	Wild-type	HTT-SD	HTT-SA
	1.13	3.58	2.25
	2.51	1.88	2.0634
	-0.65	1.00333	1.2034
	2.00333	2.08333	1.55333
	0.156667	2.66	2.19
	0.803333	1.795	3.59333
	1.02333	2.48333	1.01667
	0.933333	1.06667	1.08
	1.08	0.983333	0.9
	0.956667	1.06333	-0.046692
	1.025
	-2.391	-1.624	-0.903
		-1.607	-1.527
	-1.185	-0.267	-3.53
		-0.793	-2.846
	-0.522
			-2.821
		-3.581	-2.732
	-1.21	-1.547	-2.756
	-1.071		-3.079
			-1.233
		-1.788	-3.106
	-0.985	-1.017	-3.741
		-0.565	-1.651
	-0.893		-1.965
	-0.228	-0.195	-2.522
	-0.393		-0.418
	-0.319	-0.914	-0.924
			-1.469
			-0.167
			-2.252
			-2.721
	-3.247		-2.419
	-0.794		-2.602
	-0.427	-0.167	-1.244
	-5.05	-4.547	-2.597
			-0.63
	-2.187
	-0.139		-2.92
	-0.863		-2.855
	-3.342
	-1.583		-0.543
	-2.679
	-4.342	-1.702	-1.768
		-1.79
		-1.067
		-0.937
	-3.304		-1.539
	-3.301	-1.769	-0.779
	-1.662		-1.501
			-2.14
		-1.183	-1.23
		-2.364
	-2.314
		-1.774
	-1.715	-1.731	-2.74
	-1.692		-2.728
	-1.652		-2.429
			-1.8
			-2.626
	-4.114	-0.805	-0.897
		-2.602	-2.74
	-3.367		-2.433
		-2.219	-2.026
		-0.773	-1.736
	-0.425	-0.786	-1.102
		-0.983	-3.44
			-1.556
		-1.351
			-0.634
			-0.749
		-2.537	-0.151
		-2.804	-0.432
		-2.592	-1.923
	-0.206	-0.618	-0.92
		-3.088	-2.765
		-2.438	-3.198
	-0.736	-3.483
	-0.566		-1.937
	-0.382		-5.294
		-5.252
	-3.765
	-3.135
	-1.946
	-2.519
	-0.495
	-0.472	-0.477	-4.397
		-0.581	-3.406
		-0.278
	-0.141	-0.585	-3.975
	-2.362		-2.43
	-1.84	-2.45
	-1.013		-3.168
	-1.918
	-0.254		-0.425
	-0.861	-1.48	-1.426
	-0.76	-0.607	-0.555
	-0.8		-0.591
		-2.169
		-0.277
			-2.311
	-0.549
	-1.234		-1.538
	-0.536		-1.872
	-0.549
			-0.297
	-1.859	-1.913
	-3.157	-1.267	-1.162
		-1.816
	-0.251	-2.87
	-2.411	-1.089	-2.371
	-0.119	-1.421	-1.844
		-3.355	-0.738
		-4.593	-0.949
	-2.362	-2.191	-0.841
	-1.953
	-1.639		-1.336
		-0.565	-0.982
	-1.394	-2.486	-0.888
	-4.52	-3.08	-2.19
		-0.321	-0.138
	-0.548		-0.267
	-3.044		-0.869
		-6.43	-0.208
			-0.913
			-1.949
			-0.121
	-1.444	-3.062
	-1.005	-3.656
	-2.222	-1.227
	-1.092		-2.216
	-1.756
	-1.192
	-1.444	-0.595	-2.32
		-0.899
	-2.649
		-1.837	-2.066
	-0.441	-2.403	-1.914
	-2.322	-1.03	-2.376
		-1.96	-0.555
	-2.064		-0.47
		-3.965	-0.93
	-1.681	-0.626	-2.634
	-0.511	-0.544
	-1.116		-1.893
	-1.858		-2.473
		-0.9	-2.352
		-0.141	-1.913
	-1.339	-2.635	-1.102
			-0.27
	-2.41	-3.634
	-0.736		-3.648
		-0.351
		-0.714
	-1.841	-0.705
	-1.626
	-4.531	-0.878
		-0.151
	-2.163
	-4.566
	-4.291	-0.329
		-2.24
		-1.726
	-1.693	-1.617	-1.569
			-1.131
	-0.919	-1.715	-1.059
	-1.631		-1.1
	-1.726	-0.17	-1.438
			-5.212
	-2.418	-0.897	-2.985
		-1.541	-2.538
			-2.456
		-1.412	-3.18
			-3.024
	-2.128	-3.228	-4.393
			-1.122
		-1.271	-4.416
		-1.83	-2.608
	-1.658	-3.395	-1.271
			-2.331
		-0.466	-2.338
	-1.207	-0.855
	-1.119	-1.69
	-2.264		-1.205
			-5.228
	-1.039		-0.364
	-0.404	-0.496	-1.241
		-0.829	-2.371
		-1.017
	-1.269	-1.62
		-1.198	-0.144
	-0.273	-1.405
	-1.11
	-1.481	-0.521
		-1.422
	-0.873		-0.98
		-0.719
			-2.467
			-1.704
			-1.275
	-0.141	-1.135
		-2.156	-3.116
	-0.923		-4.295
		-2.438
	-1.149	-2.965
		-1.229
		-0.149	-5.009
	-2.818		-3.275
	-1.59		-1.032
		-1.262	-0.988
	-0.904	-2.591	-2.075
	-5.271		-0.801
			-1.482
	-1.858	-3.157
			-2.205
	-0.323		-0.298
			-0.563
		-2.087
			-1.906
			-1.167
	-1.42	-0.977
	-1.479	-1.688
	-1.721
		-2.674	-2.028
	-1.618	-1.693	-1.307
		-0.555
			-3.016
			-1.698
	-0.77	-1.037	-4.523
	-1.085	-1.381	-4.1
	-0.551	-0.933
	-1.74	-1.925	-0.55
		-1.379
		-1.602	-0.555
			-0.912
	-2.706	-1.072	-2.312
	-2.941	-1.843	-1.748
	-2.362		-2.316
	-1.846	-1.793
			-0.98
	-0.683	-0.858	-0.857
	-0.835
		-0.24
	-3.131	-1.006	-0.476
		-0.958
		-0.576	-1.22
		-1.218
	-3.147		-0.767
			-0.26
			-0.492
		-4.227	-1.566
	-1.138	-0.824
	-1	-1.011	-0.384
	-1.028	-2.117
	-3.2	-0.251
	-1.77	-0.181
			-1.806
	-3.011	-1.05
	-0.267		-1.376
	-1.253	-0.638
	-1.383		-1.435
	-1.672	-1.671	-0.594
	-2.87	-4.353
	-3.167	-0.804
	-0.94
	-0.739	-0.134	-0.807
		-0.659	-2.114
			-0.594
		-3.432	-3.402
	-1.565	-1.785	-0.738
		-2.286
			-3.029
			-0.465
			-3.176
	-1.922	-0.178	-1.922
	-0.456	-0.892	-3.022
	-0.435		-2.382
			-0.115
		-1.549	-2.074
		-1.435	-1.733
			-0.456
	-3.136	-2.758	-4.239
			-4.252
	-2.109	-0.228	-0.468
	-2.523
	-2.959	-3.833
	-2.676	-0.946	-0.708
	-0.578	-3.734	-1.381
	-1.791	-3.538	-4.34
	-1.048	-3.111	-2.617
	-4.36	-3.855
	-2.738	-3.15
	-0.638
	-3.367	-0.585
	-3.424		-3.813
	-4.205	-1.405	-2.242
	-3.467	-0.945	-2.967
	-3.424	-1.867	-1.115
	-0.105	-0.904
	-0.191
		-0.626	-3.395
		-0.578	-2.398
	-2.317
		-1.548
			-1.565
	-0.69	-2.477	-0.641
	-0.251	-2.38
		-3.241	-3.914
	-3.209	-0.699	-0.547
	-3.054	-0.988	-1.431
			-1.724
			-0.862
			-1.203
	-0.909	-2.735
	-2.117
	-3.647		-2.114
	-3.343	-1.481	-2.808
	-1.254	-1.088	-1.014
		-0.552
	-2.228
			-1.383
	-1.646	-1.907	-0.963
	-2.231	-0.558	-0.971
	-1.128	-0.551
	-1.564
	-0.534	-0.171
			-1.015
			-0.81
		-0.468
	-2.085		-1.816
	-0.623	-3.461
	-0.811	-4.225	-1.891
	-1.681	-1.909
		-2.992	-0.903
			-1.604
			-1.966
	-3.097		-2.276
	-0.953	-0.663	-2.406
		-1.486	-2.33
	-0.613	-2.635	-2.373
			-2.172
	-1.858	-0.851
	-1.837		-0.808
			-4.165
		-0.952	-0.758
	-0.243	-1.131
			-2.674
	-5.166	-3.405
		-3.411	-0.191
		-0.324	-4.68
	-2.169		-5.611
			-0.825
	-0.232	-1.955
			-1.721
	-0.422	-0.535
			-0.705
	-0.939	-2.109	-0.902
	-1.643
	-0.667	-2.54
		-1.21	-2.113
	-4.115
	-3.852	-0.264	-1.797
	-4.048	-2.509	-0.668
	-0.17	-0.801	-0.279
	-0.893	-1.008
	-1.361
	-2.215		-0.35
	-2.019	-1.187	-0.649
	-3.643	-1.145
		-1.897	-6.68
	-1.303
	-1.059	-1.192
		-2.294	-1.675
	-2.75		-0.231
	-0.623		-2.534
	-1.202	-1.051
			-1.337
			-3.182
			-1.854
			-0.744
		-4.418
		-1.915	-0.694
		-2.624	-0.686
		-4.187
			-2.191
		-1.568
	-2.345
	-4.374	-0.967
	-1.742		-2.07
	-0.708	-1.702	-0.424
		-0.369	-2.006
	-3.68
	-4.461	-0.731
	-0.292	-2.229
	-2.719
	-2.379	-1.577
		-0.984
		-0.107
	-4.145	-1.1
	-3.948	-0.381	-1.528
	-3.784	-2.799	-0.801
	-1.91	-0.207	-1.917
		-2.679	-2.305
			-2.849
			-0.716
	-2.991		-2.557
	-2.327		-1.09
	-3.441		-0.253
	-3.423		-3.677
			-0.167
	-1.046		-4.16
	-0.694
			-2.791
			-2.004
	-2.93		-3.11
	-3.792		-0.191
			-3.22
	-0.481
	-0.223		-3.877
			-0.125
	-0.705		-4.621
	-1.894		-3.276
	-4.671		-1.236
			-0.716
			-1.023
	-2.476
	-1.569	-1.475	-2.429
	-2.11	-2.043
	-0.491	-3.638	-3.229
		-1.442	-4.111
		-2.122
			-1.933
	-2.914
		-4.087
		-3.596
		-3.172
			-1.036
	-3.229	-1.689	-2.538
		-4.661
	-0.268	-1.283
	-2.565		-0.731
			-1.552
	-2.309
	-1.778		-0.47
	-0.751		-0.361
	-1.354	-3.161
	-1.454	-0.354
	-1.742
	-2.005
	-1.502
	-0.535
	-1.188
	-0.431	-2.415
		-1.048
			-1.161
			-2.516
			-0.268
		-0.91
		-2.732	-1.873
		-1.096
		-3.858
			-0.478
			-1.447
		-0.527	-1.7
		-1.506	-1.209
			-3.345
		-2.23
		-4.879
		-1.707	-4.823
			-3.754
			-2.6
		-1.188
		-0.323
			-3.172
			-2.74
			-3.86
		-4.241	-4.549
			-0.521
		-2.572	-4.797
			-3.981
			-4.492
		-0.921	-4.477
			-1.336
			-0.465
			-4.055
		-2.993
		-0.167
		-1.396
		-2.351
			-2.898
		-2.667	-0.845
			-2.408
		-1.971	-0.801
		-1.362	-2.357
		-0.428
		-1.251
		-1.204	-1.706
			-0.445
		-0.208	-0.346
			-1.721
		-1.611	-0.609
		-1.804
		-3.518	-4.201
		-0.324	-1.256
		-0.876	-3.337
		-2.04
		-2.604
		-0.276
		-1.845	-0.445
		-1.076
			-1.618
		-1.52
			-0.928
			-0.853
		-1.375	-3.841
		-0.503	-0.778
		-2.862
		-2.979	-2.973
		-1.516	-1.114
		-0.975
		-2.83
			-1.249
			-2.372
		-3.35
		-4.12	-2.779
		-3.936	-3.205
		-2.794
		-0.872	-2.713
		-0.736	-0.931
		-1.338	-1.451
		-2.628	-1.879
			-1.767
		-1.283	-2.266
			-0.937
		-0.942	-0.937
		-2.951	-0.463
		-1.658	-1.689
		-0.771	-0.167
		-2.223	-1.757
		-1.401
		-1.008	-3.515
			-1.977
		-3.884	-2.351
		-1.327
		-2.326	-2.295
		-1.866	-1.183
		-2.679	-1.757
		-1.913
		-1.674
		-1.814	-1.628
			-0.382
		-1.159	-0.36
			-1.488
			-0.779
			-0.937
			-1.147
			-2.886
			-3.497
			-1.205
		-1.069	-2.113
		-1.661	-3.153
		-1.308	-1.138
			-1.852
		-0.956
		-4.293	-0.465
			-3.107
		-0.848	-4.815
		-3.712
		-1.039	-0.541
		-1.117
			-2.971
			-0.803
			-0.209
			-0.938
			-5.782
			-2.929
		-1.138	-1.644
		-1.916
		-0.78	-1.709
		-5.333	-4.343
		-1.6	-0.432
			-0.501
		-1.91	-0.621
			-3.008
		-0.602
		-0.493	-1.77
		-0.62	-0.78
		-0.676
		-0.873
		-1.483	-0.84
			-1.262
		-1.566	-1.307
		-0.114	-2.539
			-2.442
		-2.339
			-2.05
			-0.638
		-1.604
		-0.949
		-1.741
		-1.872	-1.077
		-2.164	-1.834
			-0.106
			-0.608
			-3.308
			-2.07
		-1.746	-0.206
		-0.919
			-1.31
			-2.078
			-1.171
		-1.497	-0.984
			-1.063
		-2.239	-4.422
			-2.19
		-1.852	-0.735
		-1.255
			-0.803
		-2.5
		-3.366	-1.564
			-1.679
		-2.191
			-2.841
		-0.109	-1.121
			-2.266
		-4.663	-1.463
		-2.049	-0.999
			-4.435
		-1.196	-1.751
		-1.676	-0.837
			-2.65
		-2.107	-3.025
			-1.482
			-1.426
			-1.65
		-1.169
		-2.561
		-1.018	-0.412
			-1.791
		-2.759	-0.916
		-2.041	-1.386
			-1.776
			-2.394
		-2.925
		-1.478
		-1.509
		-2.006
		-2.823
		-0.127
		-2.323
		-1.248
		-1.681
		-0.787
		-2.804
		-3.236
		-3.184
		-2.561
		-0.825
		-2.466
		-0.168
		-4.632
		-0.963
		-2.389
		-0.794
		-0.772
		-1.75
		-1.125
		-0.942
		-1.796
		-2.622
		-2.75
		-2.185
		-0.112
		-0.505
		-2.058
		-0.977
		-0.943
		-0.364
		-1.068
		-1.935
		-2.362
		-1.708
		-1.96
		-1.769
		-2.221
		-1.276
		-2.698
		-2.158
		-2.317
		-1.575
		-0.303
		-1.704
		-2.179
		-1.351
		-4.385
		-2.114
		-0.471
		-3.82
		-1.478
		-1.262
		-1.928
		-3.416
		-0.476
		-1.899
		-0.644
		-1.934
		-0.429
		-1.9
		-3.345
		-1.234
		-0.502
		-2.036
		-2.609
		-0.944
		-5.42
		-1.109
		-1.288
		-2.859
	-3.653	-2.942	-0.51
	-1.584
	-3.855	-2.706
	-0.961	-1.343
	-2.978	-0.476	-1.696
	-2.873	-0.684	-1.049
	-1.758		-5.7
		-2.261
		-0.291	-1.175
	-0.741	-2.126	-1.505
	-2.354	-0.983	-1.614
	-0.654
		-1.684
	-0.958	-1.242	-2.18
	-2.452
	-1.165
	-3.456		-0.512
	-1.584
		-3.634
		-1.238
	-4.459
	-2.277	-2.027
		-1.272	-2.408
		-1.671	-2.665
		-1.137	-1.218
		-3.137	-2.594
		-0.603	-2.881
	-1.071		-2.431
	-1.193		-0.635
	-2.966		-2.679
			-1.908
	-2.614
	-3.735	-0.599	-4.76
		-0.548
		-2.746
	-2.829	-0.864
	-2.339	-1.714
	-1.056	-1.417	-1.707
	-1.485	-0.898	-3.348
	-3.617	-2.195	-4.996
	-2.94
	-2.955	-1.946
	-2.52	-3.573
	-0.517	-2.116	-0.233
		-3.22	-4.394
		-0.191
	-1.647		-1.496
			-2.102
	-5.126	-1.474	-2.679
	-0.823	-1.291
		-2.263
		-1.66
	-1.482
		-1.039	-1.978
		-0.518	-1.267
		-2.211	-4.319
	-1.915		-2.717
	-0.608	-2.903	-2.174
	-3.023	-1.85
			-3.494
	-0.98
	-4.356		-0.709
	-2.802		-0.777
			-1.123
	-4.24		-3.478
	-0.198	-0.384	-0.77
	-0.226
	-4.225	-2.652	-0.525
	-1.233		-0.741
	-1.611	-2.98	-2.78
		-2.116	-1.402
	-0.13	-2.204
	-3.615	-1.227
	-1.423	-0.831
	-0.216	-2.586	-1.947
	-1.54	-2.18	-2.468
		-0.837	-0.105
	-2.206	-2.119	-0.447
		-0.64
		-2.121
	-3.618	-2.417
	-0.976	-2.17
	-2.364	-2.354	-1.773
		-1.908
			-0.132
		-2.163	-3.2
		-1.673
		-1.041	-0.352
		-1.668	-1.208
		-1.775
		-2.58	-0.969
		-1.245	-1.764
			-2.67
	-0.161		-1.936
		-0.938	-1.451
	-1.932	-0.293
	-1.865	-0.235
	-0.765	-0.236
	-0.236
	-1.568	-1.742
		-1.111
	-1.165
	-0.949		-2.17
	-1.692		-3.696
			-0.368
		-2.401
	-3.656		-1.076
	-2.524		-0.568
		-1.486
			-1.691
	-1.215
			-2.044
	-2.115		-6.159
	-0.738		-2.678
	-0.931	-2.715	-0.781
	-2.151	-0.715
	-0.959	-1.538	-1.149
		-1.666	-1.654
			-1.899
			-0.893
			-0.683
			-1.067
	-1.108		-1.696
	-1.564	-0.437
	-1.983	-0.766
	-1.847	-1.393	-1.004
		-1.402
	-2.886		-4.176
		-0.223	-0.971
	-2.836		-1.349
	-3.273		-2.36
	-1.319		-1.669
	-1.838	-2.101
	-2.52		-1.026
		-2.641	-3.314
	-1.835	-5.427	-2.226
		-0.167
		-6.258	-0.734
		-0.856	-1.113
		-1.014	-1.198
	-3.855	-1.269
			-4.897
	-3.834
	-3.698
			-0.743
	-1.094
	-2.154		-1.003
	-0.993		-0.587
		-2.571	-0.649
		-3.32	-1.911
	-1.725	-0.486
		-0.727
	-0.743
	-1.11
	-3.774		-3.191
		-0.264	-0.281
	-3.274	-1.33
	-1.293	-2.059	-2.481
		-0.252
	-2.967	-0.315	-1.812
		-1.834	-0.843
		-1.613	-2.021
	-1.895	-1.544	-2.752
	-1.993	-2.783	-0.682
	-2.97	-1.263
	-1.267		-1.664
	-2.886	-1.159
	-1.017		-0.611
		-1.423
	-0.65		-0.908
	-0.157		-1.455
	-3.057		-2.996
			-1.591
	-2.095	-1.434
	-3.506		-1.17
	-0.234	-0.311	-1.246
	-0.33
	-0.382	-0.212
			-4.262
		-0.324	-3.22
		-1.968
	-3.681	-1.921
	-2.934		-1.164
			-2.718
			-0.812
		-3.928
		-2.973	-2.23
	-1.808	-2.399	-0.923
	-1.142
	-1.336	-0.206	-4.585
	-4.321		-1.159
		-0.892	-1.089
		-1.567
	-3.774
			-2.535
			-1.386
	-1.514		-1.688
	-2.84		-1.243
	-1.686		-1.655
		-0.472
		-0.617
	-2.445	-3.041	-5.144
	-0.998	-2.298
		-0.479	-0.724
	-4.226	-1.699	-3.686
		-3.296	-5.361
	-2.93	-4.913	-0.506
	-1.212
		-5.153	-0.862
	-0.63	-2.055	-1.155
		-1.093
	-2.56
	-2.066		-5.393
	-2.576		-5.816
	-3.959
	-2.668		-0.85
		-4.395	-1.85
		-3.392
	-1.603		-0.638
		-0.57
	-0.238	-2.501
		-2.236	-1.584
	-5.558	-0.63	-2.892
	-1.543	-2.78	-2.886
	-2.668	-2.754	-0.638
		-0.821	-1.612
			-1.125
	-1.973
			-1.169
	-3.798
		-0.945	-2.841
		-1.027	-0.497
			-1.559
	-5.089		-0.693
			-2.312
	-2.367		-1.911
		-2.34	-0.768
	-1.602	-2.416
	-1.049		-1.339
			-1.406
			-3.545
		-1.571	-0.818
		-0.287
			-1.562
			-1.458
	-0.287
		-0.268	-1.921
		-2.938
		-5.453
		-5.643	-2.283
		-2.665	-0.767
		-1.672	-0.955
	-1.755	-1.529	-1.087
	-1.278
	-4.991		-0.469
	-1.178		-0.892
	-0.446	-1.603	-2.158
	-0.993		-3.018
	-0.51		-1.22
	-0.558	-1.228
	-0.935	-2.057	-1.536
		-2.661
	-0.144		-2.919
		-1.567	-2.087
		-3.424	-2.16
		-2.004	-2.609
		-3.637
			-3.21
	-4.261		-2.416
	-3.917		-2.083
	-0.569		-0.981
	-4.858		-2.046
			-0.556
			-1.312
		-5.854	-2.26
	-2.354	-1.318	-2.227
		-2.902	-0.595
	-4.036	-0.727
	-2.209
		-2.968	-3.555
		-5.439
	-5.246		-2.402
		-0.827
		-2.874	-1.66
	-6.147	-3.69
	-3.669
	-2.817	-1.742
	-0.517		-4.361
	-0.795
			-1.138
	-1.292	-2.21
	-1.645	-0.437
	-1.117	-1.251	-2.921
		-2.627	-4.88
	-1.009
		-3.595
		-0.167
	-1.431	-0.345
	-1.604	-0.927
	-0.636	-1.339	-2.453
	-1.469
	-2.436		-1.021
			-3.366
	-0.446		-1.478
		-2.388
		-3.184	-0.979
	-0.556	-1.57	-0.476
			-0.553
	-2.006
	-1.416	-1.934	-1.531
			-1.875
	-0.446	-2.69
			-0.303
			-1.674
	-2.953
	-1.712
	-0.594	-1.654	-1.042
		-3.581
	-2.558	-3.248	-2.972
			-3.361
			-0.693
			-1.847
			-1.43
			-2.372
		-1.716	-1.971
		-2.498
		-1.024
			-2.842
		-0.64	-1.553
	-3.058	-2.669
	-0.515
	-1.398
	-1.43	-2.669
	-0.198	-5.784
	-0.93	-0.849
	-2.209	-1.521
	-2.403	-1.454
	-1.45		-1.369
	-1.798
			-0.785
	-2.518		-1.809
	-3.081		-0.657
	-1.887	-0.963	-2.249
	-2.584	-1.654
	-1.578	-1.803	-0.423
	-0.878	-2.042	-4.688
	-2.288		-1.566
	-2.284	-3.017	-0.632
	-1.629		-1.758
	-2.637	-2.852	-2.983
		-3.214	-1.553
	-0.457	-3.15	-0.223
			-2.679
		-2.39
		-0.422
	-0.114		-1.477
	-2.86	-0.563	-1.199
			-1.646
	-0.698		-0.223
	-2.13	-3.375	-1.46
	-1.575		-0.287
			-1.404
	-1.631	-1.731	-0.37
		-2.771	-1.709
	-1.106		-1.206
	-1.276	-2.478
	-4.224	-1.605	-2.584
	-1.318	-3.411
		-3.745
	-1.558		-3.953
	-2.71	-0.437	-2.322
	-1.777
			-0.37
			-1.337
	-1.61	-1.07
	-3.654	-1.293	-0.759
	-1.381	-1.59
			-0.605
		-1.097
	-4.589	-3.223
	-5.204	-2.866	-1.337
	-0.198		-1.722
		-1.763	-1.503
		-1.439	-1.693
		-2.785	-2.268
	-0.79
	-1.708	-1.33
			-2.369
	-2.352
		-1.644	-1.751
			-1.337
	-2.406
	-1.542
		-5.108	-1.428
		-2.711	-0.972
	-2.411
			-0.758
			-3.219
			-2.377
	-1.053		-0.656
	-2.549		-0.407
	-2.64
			-3.381
	-2.488	-0.757
	-0.504	-0.472
		-4.331	-2.577
		-5.208
		-1.604	-3.929
		-1.787
	-2.123
	-2.068	-2.897	-1.672
		-0.431	-1.196
		-2.091
	-1.59	-2.118	-1.731
	-2.831	-2.302
	-4.062
		-2.533
		-0.514	-0.171
	-3.178	-1.401	-3.785
	-0.113		-2.704
		-1.57
		-2.505	-1.704
	-1.576		-1.109
	-1.479		-0.16
	-3.679		-0.153
		-0.615	-2.278
		-0.22
	-0.574	-0.688	-4.016
	-0.464		-0.744
	-0.129	-1.194	-0.407
	-1.234		-0.953
	-0.492	-2.406
	-0.502
	-2.677		-0.119
	-0.453
		-0.829	-1.605
		-0.623	-2.253
		-0.539
	-0.796	-0.838	-2.077
		-1.061
		-2.542
	-0.152	-0.265	-0.932
	-4.586	-0.968	-0.465
	-1.782
		-0.503	-0.867
	-5.397	-0.383	-0.9
	-5.71	-0.259
	-3.939	-1.734
	-6.014
	-4.738	-1.197
		-1.176
	-2.135	-2.79
	-5.011	-0.65
		-1.138
		-0.525
	-4.811
		-0.608
	-1.893	-2.049
			-1.145
		-1.481	-1.106
		-2.085
	-0.977		-3.079
	-0.702	-0.67	-0.772
	-1.108	-1.2	-1.245
	-2.343	-0.121	-3.629
	-0.538		-1.693
	-0.687
	-2.704	-1.844	-3.919
	-2.809	-0.686	-2.432
	-4.144	-1.962	-0.58
		-0.611	-2.566
	-0.94
		-1.783
	-2.13		-2.41
	-2.232		-2.494
		-1.298	-1.833
	-3.642	-1.569	-5.538
		-1.093	-4.399
	-2.276	-0.955	-0.496
	-0.115	-3.626	-1.636
		-0.945	-2.638
		-2.218
		-2.914
		-0.691	-1.765
			-1.651
			-1.095
		-2.625	-1.549
			-1.456
			-1.512
			-1.506
			-1.035
	-1.798		-1.148
	-0.824		-2.232
	-1.338		-1.729
	-1.64
	-0.733
	-1.643
	-1.264
			-1.473
	-2.342		-1.13
	-1.495
	-0.786
		-3.058
		-2.18
	-1.888	-3.44
	-1.546	-2.729
		-3.711	-0.196
	-2.817	-3.495	-1.636
		-1.657	-1.318
	-1.567	-2.745	-2.937
		-2.574	-1.171
		-5.065
		-4.515
			-1.272
			-1.247
			-1.14
			-1.388
	-2.125		-0.297
	-3.479		-1.995
			-0.948
	-2.98		-2.677
	-0.867
	-1.643
	-2.599	-1.551	-0.223
	-1.148	-1.584	-1.648
	-0.401	-1.856
	-3.635		-1.562
	-2.886		-0.918
	-1.577	-1.516	-0.697
	-1.643	-6.752	-2.59
	-1.719	-2.057	-0.729
		-1.478	-2.606
		-0.753	-1.655
		-2.307	-2.777
		-5.559	-0.562
	-2.499	-3.871	-1.372
	-2.134		-0.267
	-3.075	-2.32
	-3.028	-0.502
		-0.899	-1.941
		-2.814	-0.917
			-1.727
	-0.208	-2.137	-6.818
	-2.287		-2.321
	-0.942	-1.898
			-0.942
	-1.187
			-3.75
	-0.923		-3.125
	-0.232	-3.084
	-1.876	-2.534	-0.574
	-1.313	-2.482	-1.904
		-2.222
	-1.852
		-2.699
	-1.876	-1.721	-1.562
		-0.401	-4.444
	-1.489		-0.1
	-4.02		-0.781
		-1.115
	-1.036		-0.893
	-1.145
	-1.854		-1.19
		-1.287	-0.574
		-2.368	-4.423
	-0.689	-0.728	-0.374
	-1.622	-2.887
	-2.122	-1.46
		-1.975	-1.655
		-1.179
	-3.808
		-0.991
	-0.841
	-0.493		-0.577
	-0.937		-0.238
	-3.694		-1.451
			-1.833
	-2.958	-2.402
	-0.309	-0.137	-0.67
	-1.626	-1.798
	-3.394	-2.023	-0.199
	-3.45	-2.229	-0.616
		-2.566	-0.449
		-2.183
	-4.011		-0.807
			-0.897
	-2.986
	-1.754	-2.114	-1.075
		-0.237	-1.821
	-2.963		-3.304
		-4.597
			-2.064
	-4.011		-1.265
	-2.267	-2.462	-1.71
			-2.815
	-3.566	-1.02	-0.117
	-2.05	-2.399
		-1.857	-1.341
		-0.328	-1.01
		-3.854	-1.806
	-3.225
		-0.529	-3.493
	-1.668		-1.006
	-3.21	-0.669	-3.926
	-1.826
		-2.087
	-5.408
	-6.135		-2.631
	-4.334
	-5.906
	-4.109
			-0.258
			-3.444
	-0.276		-3.55
	-0.67		-1.831
			-1.981
	-3.735	-1.448	-1.703
		-1.293	-1.592
	-3.233	-1.027	-2.035
		-1.237	-2.943
	-1.653	-2.414	-1.207
	-2.233	-3.233	-2.246
	-3.775	-0.851	-1.584
	-2.551	-2.321	-2.493
			-1.549
	-1.732		-1.704
	-1.393
	-0.412		-4.711
	-2.014
	-1.897		-4.088
	-0.983	-1.614	-1.239
	-1	-1.194	-2.498
	-0.268	-1.514	-0.186
	-1.648	-0.402	-2.436
	-2.136	-1.822	-4.382
	-0.892		-0.196
	-1.69		-4.911
	-1.07		-1.979
	-0.26		-0.547
	-1.463	-1.752	-0.909
	-2.031	-3.284
	-2.787
		-0.427
	-3.078	-2.518
		-0.962	-1.769
			-2.062
	-0.963
	-1.523		-1.856
			-1.832
	-1.676		-6.044
		-2.711	-4.64
	-1.043	-2.108	-0.563
	-2.689	-1.775	-1.004
	-2.081		-3.654
		-1.489	-0.747
		-1.893	-0.316
		-0.99	-0.669
		-1.482	-4.016
			-0.977
			-1.841
	-2.907	-1.723
	-5.97		-2.822
	-2.021	-1.947
	-0.711	-0.185
	-0.644
	-0.501
	-2.301		-4.758
	-0.767	-1.582	-3.56
	-0.86		-3.399
		-1.339	-1.502
	-1.686		-1.299
	-1.367
	-2.048
	-0.501	-1.832
	-2.708	-2.678	-1.928
	-2.496		-2.075
		-3.019	-1.1
		-0.152
		-1.645
	-1.778	-1.246
		-0.638
	-2.459	-1.841	-1.766
	-2.348		-1.839
	-3.747	-4.08	-1.049
	-0.335		-2.675
			-3.795
	-1.777		-4.203
		-1.952	-1.146
	-4.925	-0.88
	-4.253
		-2.325
	-2.063
	-0.84		-0.733
	-1.171	-1.819	-1.548
			-1.938
	-2.677		-0.865
			-0.333
	-1.46
	-1.004	-1.93
	-0.833	-2.944	-2.252
	-2.77	-2.218
		-2.848
	-1.029	-1.959	-1.89
			-0.667
		-2.141
			-1.235
	-0.389	-3.469
		-2.026	-2.223
		-3.455
		-3.542
			-1.413
			-1.348
			-0.433
		-2.956
	-1.257	-3.254
	-1.799		-4.307
	-1.645	-1.718	-4.919
	-2.43	-1.115
	-2.52	-1.5
		-0.65
	-2.674	-3.398	-1.431
		-3.251
	-0.588	-1.834	-2.742
		-0.994	-1.677
		-5.215	-0.567
		-0.248
	-2.853		-0.288
	-1.337
		-1.858
	-3.371	-0.837
	-0.198	-2.295
	-1.7	-1.238	-3.918
	-2.739	-2.117	-1.423
	-0.624	-0.618
	-2.102
	-2.052
	-3.8
	-2.719
	-3.21
		-0.699
	-3.638
		-0.957
	-2.297	-2.841
	-2.421
	-0.991	-0.586
		-0.484
		-1.042
	-2.277
		-1.892
		-2.333
	-0.669	-0.973
		-3.737
		-0.424
	-1.902	-1.939
		-2.118
		-0.349
		-3.739
	-1.88	-3.655
	-0.868
	-0.834	-0.242
	-2.047	-0.975
	-0.592
	-0.847
	-1.941	-2.643
	-1.147
	-1.438	-1.881
		-2.136
		-0.894
		-3.609
	-0.295
	-2.476	-1.89
	-1.095	-3.016
	-2.183	-1.128
	-1.577
	-1.566
	-2.006	-1.656
	-1.616
		-1.111
	-1.202
	-1.248
		-1.803
		-2.204
		-1.221
		-1.251
		-1.119
		-2.498
		-1.81
		-0.963
		-2.337
		-0.511
		-1.271
		-1.283
		-1.723
		-1.102
		-1.226
		-0.451
		-0.878
		-0.321
		-2.733
		-1.222
		-1.295
		-1.729
		-2.247
		-3.147
		-1.97
		-3.263
		-3.041
		-4.157
		-0.891
		-2.976
		-1.258
		-1.375
		-1.346
		-1.71
		-0.998
		-3.589
		-0.237
		-0.573
		-3.12
		-3.505
		-1.231
		-4.619
		-2.507
		-1.337
		-2.343
		-1.468
	-2.03	-1.346	-3.424
	-2.576
	-1.409
	-1.079
	-0.282		-2.031
	-0.591		-1.81
			-2.962
			-1.958
	-1.937		-1.398
			-1.617
	-1.02		-2.335
	-0.745	-3.709	-0.815
	-1.941	-3.14	-1.42
			-2.545
		-2.694	-3.038
		-1.533	-0.496
		-0.191
	-2.943	-2.902
	-2.486		-3.524
		-1.731
	-1.474	-2.239
	-2.632	-2.552
	-2.394	-3.872
	-0.602	-3.21
		-3.14
		-2.26	-0.862
	-1.177	-0.115	-1.395
	-1.141	-4.263	-3.684
	-0.536	-0.38	-1.093
	-1.673	-2.957	-0.466
			-2.248
	-1.474	-2.649
	-0.735	-4.013	-1.494
	-2.831		-2.451
		-1.216
	-5.107
		-4.28
	-4.59		-1.115
		-2.27	-0.334
	-6.252	-3.253	-0.255
	-3.248	-3.167	-0.502
			-0.365
			-0.606
			-1.23
	-2.824
	-2.081	-0.638
	-0.759		-1.09
	-1.146		-1.204
			-1.485
	-4.331	-0.955	-1.739
		-0.704	-1.873
		-0.376	-0.772
		-0.141	-0.565
		-0.892
	-1.802
	-2.685	-3
		-3.477	-2.887
	-3.781	-0.178
	-2.13	-3.643	-2.587
		-1.264
		-1.444	-2.049
	-1.144
			-3.717
	-1.109	-0.574	-1.133
			-2.352
		-1.457
	-2.199		-3.423
			-1.06
		-1.339	-0.657
		-0.462	-0.243
	-2.344
			-2.268
	-1.155		-1.392
	-1.229	-3.385	-0.29
		-1.94
	-1.476	-2.153	-1.149
	-1.448		-2.032
	-0.602	-2.418	-1.518
	-4.319
		-3.791	-0.631
		-2.28
	-2.271	-1.663	-2.878
	-2.591	-2.393	-2.207
		-4.107
			-1.229
	-2.5		-3.838
	-2.144		-0.526
			-2.075
	-2.68		-0.703
	-1.16		-2.098
	-3.643
		-1.116	-1.841
	-0.596	-2.264
	-1.15	-1.339
		-0.885
		-2.038
		-2.425
		-3.943
			-2.189
	-1.22
	-3.529		-0.404
		-0.436
	-1.15	-2.527
	-0.988
	-1.893	-1.621
	-1.489
			-0.991
	-1.039	-1.148
	-2.722	-2.765
	-1.608	-1.468
		-1.532
	-3.411	-0.648	-1.363
	-0.922	-1.996	-2.286
			-1.807
	-1.553
	-2.233		-1.175
	-1.171	-1.225
	-2.365	-2.215
	-0.569	-2.209	-4.349
			-2.6
		-1.186	-1.714
		-2.232	-0.583
	-3.106		-1.787
		-1.492	-1.097
	-0.518
	-3.81		-0.394
			-0.718
	-1.059
	-0.379
		-2.654
		-0.42	-2.348
		-2.63	-3.607
		-2.461	-2.676
	-1.242	-1.152	-1.305
			-3.887
	-2.359		-3.479
			-1.972
			-0.334
	-0.807	-1.499
		-2.574	-1.726
	-1.106		-0.426
	-0.405
	-1.989
	-1.196		-0.236
		-0.547
	-2.252	-0.412	-1.911
	-3.767
	-2.251	-2.23	-1.864
		-3.901	-0.439
		-2.358
	-0.305
		-0.338
	-0.678	-2.068
		-2.095	-3.069
	-1.055	-2.459
	-1.634
		-2.355	-2.472
	-0.421		-2.101
	-2.228		-0.467
	-1.211		-2.599
			-2.14
	-1.534	-0.365
	-1.092
		-0.35
		-2.551	-1.003
	-1.973	-0.545
			-1.338
		-2.249
	-3.037	-1.39
		-2.19	-1.402
	-0.263
	-2.301		-2.867
			-1.041
			-0.706
		-2.081
	-0.286	-1.513
		-1.464	-2.777
		-1.756
		-1.029	-0.634
			-2.325
		-0.834	-0.197
			-2.431
		-1.872	-1.651
		-0.365
	-1.996		-0.655
	-1.439	-1.217
		-1.363
	-3.234		-1.984
	-0.846	-1.588	-5.523
	-2.853	-2.035
	-0.143	-0.287
	-1.053	-0.422	-1.827
	-0.838		-3.465
			-0.555
			-1.339
	-0.11		-2.404
		-0.736	-4.061
			-1.973
			-1.19
	-2.423		-3.109
			-0.348
	-3.154		-1.811
	-0.508		-3.28
	-2.43		-5.021
		-0.864	-4.495
			-2.395
			-1.522
	-1.613	-1.658
		-1.319
	-0.86	-1.421	-0.76
		-1.664
		-3.319	-3.756
	-3.193		-1.503
	-1.04
			-5.078
		-3.375	-3.803
	-3.322	-2.635
	-3.198
	-1.675	-1.049
		-1.639
			-1.07
	-5.394
			-2.452
	-3.211		-0.193
	-2.285
	-3.998	-0.179
			-1.119
		-0.387	-1.32
		-2.679
			-3.522
		-1.339	-5.144
		-1.078
		-0.335
	-4.508	-2.67	-1.56
	-2.193
	-1.813
		-2.897
		-2.053
		-2.111	-2.037
	-0.314		-4.184
			-3.639
		-2.698	-1.093
		-2.143	-1.369
		-1.247
	-2.993
	-1.436
	-1.851		-0.63
	-2.072		-1.079
		-1.744	-3.241
		-1.599
	-2.933
		-2.498	-0.765
		-2.11	-1.535
			-2.202
		-0.446
			-0.524
		-0.963	-3.271
	-0.783	-3.393	-0.669
		-2.926
	-0.121
			-0.973
	-0.801
	-1.125
			-3.427
			-3.599
	-6.205	-1.982	-3.047
		-1.541	-3.853
	-4.316	-1.33	-3.4
		-1.826
		-0.346	-0.497
		-2.443	-4.164
			-1.508
		-0.895
		-0.417	-1.042
		-2.757	-0.282
	-0.697
	-1.204		-5.628
	-0.535
		-0.594
	-1.263	-0.299	-1.827
	-2.212	-5.118
	-4.059
	-1.491	-0.356	-1.875
	-4.62	-0.228
	-2.69
	-3.211	-4.092
	-3.425	-0.446	-0.344
			-0.817
		-0.706
	-0.618		-3.283
		-1.009
			-2.287
	-0.944		-1.069
			-2.465
			-1.978
	-0.166		-1.497
	-0.82	-2.473	-1.339
	-2.143	-1.699	-1.339
	-0.845	-2.162	-5.238
		-0.953	-5.267
		-2.135	-3.835
		-1.122
		-0.643
		-1.585	-0.912
			-0.916
	-0.93		-3.236
		-1.046
		-2.15
	-0.843	-0.882
	-0.606
	-0.719		-1.243
	-0.668
		-0.781
	-1.95
	-1.553	-1.612
	-1.785	-0.135
	-1.182
	-2.098
	-0.495		-2.659
	-1.636
	-1.636	-2.75	-3.209
		-2.863	-3.204
		-5.652
			-2.24
	-2.003	-1.737
	-3.338
	-1.814	-1.311
		-0.647
			-1.109
	-2.057		-1.573
	-1.089		-3.266
	-2.999
	-0.971		-0.357
			-0.769
	-0.385	-1.444	-1.8
		-2.24	-1.339
		-0.239
		-1.479
	-2.123	-1.32
	-1.591	-1.399	-1.813
			-1.562
			-1.709
			-0.416
	-1.206	-0.478	-0.403
	-1.075
	-2.332		-0.497
	-2.518
	-3.37
	-0.993
	-0.474
			-2.606
			-0.567
	-2.785
			-2.073
	-0.223
		-3.375
	-1.751	-0.979
	-0.534	-1.517	-4.367
		-1.91	-2.946
		-1.885
		-0.67	-2.25
		-1.851	-1.716
		-0.916
		-0.33
		-2.055
	-3.336
	-2.224	-1.586
	-2.052	-0.756
	-1.831		-4.299
		-2.349	-3.606
		-0.236	-1.202
	-2.214	-2.874	-1.133
		-0.191	-0.743
	-1.216	-0.446
		-1.806	-1.338
		-2.282
		-1.957	-2.411
		-1.212
		-0.774	-1.833
		-0.665	-1.036
		-0.727	-0.279
		-2.053	-5.441
		-1.451	-0.268
	-1.023	-2.608	-0.393
	-3.416	-2.678	-0.798
			-0.337
			-1.15
			-1.48
	-4.094	-0.778	-0.837
	-2.614		-1.236
	-4.257	-0.298	-0.157
			-1.198
			-2.33
	-1.554	-1.92	-0.223
	-2.722		-4.17
	-3.148	-3.519	-2.089
	-0.223		-0.958
			-3.186
	-0.635
			-0.953
			-0.359
	-2.439	-1.369	-0.867
	-3.501	-3.076	-0.715
	-3.465
	-0.995	-1.339
	-1.807	-0.195
	-1.639
			-1.627
		-2.024
	-0.298	-3.072
	-2.876	-2.224	-1.396
	-4.802		-2.68
			-0.952
	-4.366
		-1.64	-0.698
		-1.872
	-2.134	-3.732	-3.154
	-1.364	-3.916	-0.934
	-5.534		-0.357
		-1.497
			-4.967
		-2.16
	-0.88	-2.366
			-0.361
			-0.183
	-0.153
		-2.766	-2.421
	-0.502
		-0.478	-0.483
	-3.214	-2.435	-1.44
	-1.128	-0.591
	-2.498	-3.329
		-4.342	-1.285
		-3.76
	-0.818	-3.373	-1.368
	-0.972	-2.051
	-2.556	-2.161	-4.054
		-4.682	-1.422
		-2.675	-2.976
			-0.679
			-2.682
	-1.754	-1.829	-0.536
		-3.705	-1.341
	-1.515		-2.857
		-4.013	-2.682
	-1.249
	-0.128
		-1.027
		-0.986
	-0.708	-3.905
	-2.262
	-1.542		-2.379
	-1.287		-2.014
			-1.771
	-1.345		-0.781
[truncated: 514 more rows]
