# Supplementary material for: Huntingtin recruits KIF1A to transport synaptic vesicle precursors along the mouse axon to support synaptic transmission and motor skill learning
Source: eLife. 2023 Jul 11;12:e81011. doi: 10.7554/eLife.81011 (PMC10365837; doi:10.7554/eLife.81011)
Supplement: Figure 2—figure supplement 1—source data 1. [file elife-81011-fig2-figsupp1-data1.xlsx]

## Sheet: Figure S2a-Rotarod 1st trial
	Wild-type	HTT-SD				Wild-type	HTT-SA
	49	42				49	36
	46	11				46	24
	34	11				34	19
	18	37				18	51
	4	62				4	88
	39	49				62	37
	35	88				39	31
	66	41				43	19
	65	46				49	47
	65	68				19	51
	30	18				37	76
	23	33				10	35
	32	50				18	93
	38	53					41
	39	37					14
	8	38					41
	5	79					5
	15	22					11
	5	20
	5	45
