# Supplementary material for: Huntingtin recruits KIF1A to transport synaptic vesicle precursors along the mouse axon to support synaptic transmission and motor skill learning
Source: eLife. 2023 Jul 11;12:e81011. doi: 10.7554/eLife.81011 (PMC10365837; doi:10.7554/eLife.81011)
Supplement: Figure 2—figure supplement 1—source data 2. [file elife-81011-fig2-figsupp1-data2.xlsx]

## Sheet: Figure S2b-Day1-18m
	Wild-type								HTT-SD												HTT-SA
Trial 1	37	5	24	22	34	17	41	53	54	2	77	39	18	37	14	43	72	45	18	17	32	71	31	4	13	35	4	34	20	14
Trial 2	110	52	19	54	47	43	27	50	65	24	21	80	24	51	58	71	82	24	46	23	52	38	46	9	21	3	51	12	16	36
Trial 3	46	34	39	27	14	45	41	18	55	15	9	74	56	76	104	75	17	68	50	30	13	19	35	12	51	19	19	12	36	32
Trial 4	22	8	87	39	89	45	49	44	49	27	16	90	76	56	56	83	24	38	36	48	59	33	17	4	49	69	64	21	27	27
Trial 5	47	64	62	46	41	31	53	81	46	22	22	68	82	80	44	30	21	79	55	62	62	22	7	14	24	27	48	13	27	22
Trial 6	53	27	34	39	38	20	80	107	63	38	47	51	90	72	109	25	16	58	73	87	62	41	64	34	18	56	27	15	44	25
Trial 7	20	40	75	67	41	25	63	110	33	53	13	59	48	46	98	44	88	58	55	71	77	51	66	12	10	22	33	25	42	12
Trial 8	23	85	80	59	71	50	82	125	43	43	14	93	88	60	61	35	53	90	65	59	62	59	60	15	9	53	20	27	43	25
Trial 9	27	70	76	56	25	37	59	98	65	33	28	73	51	57	87	24	70	95	54	81	78	101	36	19	28	66	11	34	30	68
Trial 10	15	80	86	59	47	35	81	123	63	18	29	71	56	39	114	90	95	104	69	84	77	112	40	43	52	21	15	53	44	85
