# Supplementary material for: Huntingtin recruits KIF1A to transport synaptic vesicle precursors along the mouse axon to support synaptic transmission and motor skill learning
Source: eLife. 2023 Jul 11;12:e81011. doi: 10.7554/eLife.81011 (PMC10365837; doi:10.7554/eLife.81011)
Supplement: Figure 2—source data 1. [file elife-81011-fig2-data1.xlsx]

## Sheet: Figure 2c-Rotarod 8days
	Wild-type																				HTT-SD
day1	59.4	73.1	47	72	44.3	85.8	42	61.2	63.9	71.3	55.9	45.2	33.8	50.2	62.2	32.6	23	27.6	26.6	19.2	35.5	42.4	40.8	46.6	61.2	77.2	88.9	45.9	48.3	48.9	20.9	31.7	51.1	28.1	30.2	22.4	55.8	39.9	19.8	37.2
day2	112.3	94	75.8	99.4	66.6	155	70.2	54	70.5	82	49.6	59	45.8	69.5	83.8	57.2	37.3	63.7	41.6	43.9	69.3	101.6	54.1	99.2	111.8	76.6	95.2	51.5	82.3	50.4	49.7	34.9	61.5	45.7	77.8	39.7	93.1	68.6	44.4	53.9
day3	121.3	146.4	72.5	125.7	81.2	173.4	65.2	54.9	83.8	85.1	48.3	61.2	56.5	72.3	72.3	99.1	76.11	90.22	56.5	81.3	64.6	106.1	70.5	123.3	98.1	60.7	88.7	73.8	107.6	56.4	53.2	36.5	85.9	58.9	81	49.1	88.3	49.2	69.9	61.9
day4	118.8	170.1	70.6	123.2	94.9	128.4	67.1	65.2	89.2	89	61.4	58.5	70	59.8	58.6	92.8	80.1	80.1	57.5	53	100.8	122.1	59.3	90.9	87.5	81.5	88.4	74.5	86.3	56.3	57	23.9	78.7	68.3	73.9	43.3	67.6	48.5	51.1	58
day5	123.5	125.9	87.7	124	76.8	120.2	74.7	71.2	104.2	92.6	76.3	65.1	54.7	40.8	56.7	119.5	87.3	73.5	71.5	64.8	101.2	91.6	38.9	92.2	78.8	75.6	82.7	39.5	76.4	45.8	71.9	16	55.1	75.7	71.6	68.1	57.7	62	67.2	61.8
day6	102.6	120.3	102.9	138.4	70.6	104.1	71.2	59.3	83.1	94.6	57.9	74.3	50.9	50.7	58.2	40.2	61.7	73.2	112.2	88.3	98.1	103.5	59	92.6	74.3	68.8	73.9	60.2	76	15.4	36.5	46.4	61.4	70.2	65	57.4	62.5	67	81.9	75.9
day7	114.1	90.7	112.5	150.2	85.1	102.5	76.1	56.8	78.1	129	56.7	98.4	54.6	45.4	63.6	81	71.1	78.7	86.9	56.8	87.2	74.3	79.6	72.8	77.6	68.4	73.6	63.7	74	34.8	63.6	34.8	40.5	66.1	65.4	74.2	50.4	64.6	58.5	53.9
day8	131.8	92.6	111.5	146.3	76.4	104.8	69.4	70.4	77.1	99.2	59.3	86.8	68.2	48.2	41.3	90.8	90.4	90.3	96.2	52.2	71.6	87.8	69.5	96.8	81.3	71.6	88.8	79.4	72.4	38.1	82	28	52	74.3	86.3	61.6	51.6	85.7	55.6	51.9
	Wild-type													HTT-SA
day1	59.4	73.1	47	72	44.3	63.8	56.6	69.8	34.3	39.3	41.1	45	54.1	55.1	62.6	36.1	66.7	84.9	50.2	50.5	50.6	55.1	70.1	51.6	66.4	79.7	39.8	47.7	41.9	10.8	26.4
day2	112.3	94	75.8	99.4	66.6	61.6	42.3	94.5	36.7	45.8	39.5	57.6	49.9	66.2	100.2	84.3	71.7	59.3	77.8	57.1	74.8	46.2	97.7	59.7	33.5	53.8	49.9	67.6	76.5	33.6	52.4
day3	121.3	146.4	72.5	125.7	81.2	95.7	70.7	89.7	42.8	46.5	42.4	67	88.9	53.8	97.9	85.4	100.7	64.3	84.8	56.2	89.3	41.6	79.3	57.6	59.4	72.1	51	84.6	63.1	48.5	44.8
day4	118.8	170.1	70.6	123.2	94.9	92.2	82.3	76.6	43.9	33.6	49.9	62.8	88.6	36.1	68.2	109.5	109.9	69.6	68.8	82.2	96.4	41.4	88.8	57.1	69.2	84.9	70.8	81.5	64.1	43.9	43
day5	123.5	125.9	87.7	124	76.8	95.5	86.4	72.6	37.8	50.9	74.1	49.7	92.9	41.2	104.7	139.9	103.2	65.2	69.4	67.4	92.3	56.6	59.7	65.1	58.3	82.7	76.6	81.7	54.9	64.9	42.5
day6	102.6	120.3	102.9	138.4	70.6	94.1	93.7	66.4	44.6	40.9	86.3	88.4	83	44.6	74.7	113.2	92.9	60.2	63.5	71.9	98.9	44.5	58.7	61.5	84.7	80.6	67.1	84.8	71.2	65.2	35
day7	114.1	90.7	112.5	150.2	85.1	77.8	65.3	58.9	47.3	38.33	55	55.7	78.4	48.6	93.9	114.3	125.9	72.4	63.3	69.5	109.3	52.1	59.3	61.1	93.7	97.6	79.8	82.5	94.7	67.6	51.9
day8	131.8	92.6	111.5	146.3	76.4	79.4	82.5	68.9	56	43.3	71	78.8	66	62.5	118.5	118.7	106.5	66.2	76.5	64.7	119.3	44	51.6	47.7	109.1	114.8	62.6	64.6	68.1	69.4	52.3
	-2.391	-2.391											-2.391	-1.624									-1.624
														-1.607									-1.607
	-1.185	-1.185											-1.185	-0.267									-0.267
														-0.793									-0.793
	-0.522	-0.522											-0.522
														-3.581									-3.581
	-1.21	-1.21											-1.21	-1.547									-1.547
	-1.071	-1.071											-1.071
														-1.788									-1.788
	-0.985	-0.985											-0.985	-1.017									-1.017
														-0.565									-0.565
	-0.893	-0.893											-0.893
	-0.228	-0.228											-0.228	-0.195									-0.195
	-0.393	-0.393											-0.393
	-0.319	-0.319											-0.319	-0.914									-0.914
	-3.247	-3.247											-3.247
	-0.794	-0.794											-0.794
	-0.427	-0.427											-0.427	-0.167									-0.167
	-5.05	-5.05											-5.05	-4.547									-4.547
	-2.187	-2.187											-2.187
	-0.139	-0.139											-0.139
	-0.863	-0.863											-0.863
	-3.342	-3.342											-3.342
	-1.583	-1.583											-1.583
	-2.679	-2.679											-2.679
	-4.342	-4.342											-4.342	-1.702									-1.702
														-1.79									-1.79
														-1.067									-1.067
														-0.937									-0.937
	-3.304	-3.304											-3.304
	-3.301	-3.301											-3.301	-1.769									-1.769
	-1.662	-1.662											-1.662
														-1.183									-1.183
														-2.364									-2.364
	-2.314	-2.314											-2.314
														-1.774									-1.774
	-1.715	-1.715											-1.715	-1.731									-1.731
	-1.692	-1.692											-1.692
	-1.652	-1.652											-1.652
	-4.114	-4.114											-4.114	-0.805									-0.805
														-2.602									-2.602
	-3.367	-3.367											-3.367
														-2.219									-2.219
														-0.773									-0.773
	-0.425	-0.425											-0.425	-0.786									-0.786
														-0.983									-0.983
														-1.351									-1.351
														-2.537									-2.537
														-2.804									-2.804
														-2.592									-2.592
	-0.206	-0.206											-0.206	-0.618									-0.618
														-3.088									-3.088
														-2.438									-2.438
	-0.736	-0.736											-0.736	-3.483									-3.483
	-0.566	-0.566											-0.566
	-0.382	-0.382											-0.382
														-5.252									-5.252
	-3.765	-3.765											-3.765
	-3.135	-3.135											-3.135
	-1.946	-1.946											-1.946
	-2.519	-2.519											-2.519
	-0.495	-0.495											-0.495
	-0.472	-0.472											-0.472	-0.477									-0.477
														-0.581									-0.581
														-0.278									-0.278
	-0.141	-0.141											-0.141	-0.585									-0.585
	-2.362	-2.362											-2.362
	-1.84	-1.84											-1.84	-2.45									-2.45
	-1.013	-1.013											-1.013
	-1.918	-1.918											-1.918
	-0.254	-0.254											-0.254
	-0.861	-0.861											-0.861	-1.48									-1.48
	-0.76	-0.76											-0.76	-0.607									-0.607
	-0.8	-0.8											-0.8
														-2.169									-2.169
														-0.277									-0.277
	-0.549	-0.549											-0.549
	-1.234	-1.234											-1.234
	-0.536	-0.536											-0.536
	-0.549	-0.549											-0.549
	-1.859	-1.859											-1.859	-1.913									-1.913
	-3.157	-3.157											-3.157	-1.267									-1.267
														-1.816									-1.816
	-0.251	-0.251											-0.251	-2.87									-2.87
	-2.411	-2.411											-2.411	-1.089									-1.089
	-0.119	-0.119											-0.119	-1.421									-1.421
														-3.355									-3.355
														-4.593									-4.593
	-2.362	-2.362											-2.362	-2.191									-2.191
	-1.953	-1.953											-1.953
	-1.639	-1.639											-1.639
														-0.565									-0.565
	-1.394	-1.394											-1.394	-2.486									-2.486
	-4.52	-4.52											-4.52	-3.08									-3.08
														-0.321									-0.321
	-0.548	-0.548											-0.548
	-3.044	-3.044											-3.044
														-6.43									-6.43
	-1.444	-1.444											-1.444	-3.062									-3.062
	-1.005	-1.005											-1.005	-3.656									-3.656
	-2.222	-2.222											-2.222	-1.227									-1.227
	-1.092	-1.092											-1.092
	-1.756	-1.756											-1.756
	-1.192	-1.192											-1.192
	-1.444	-1.444											-1.444	-0.595									-0.595
														-0.899									-0.899
	-2.649	-2.649											-2.649
														-1.837									-1.837
	-0.441	-0.441											-0.441	-2.403									-2.403
	-2.322	-2.322											-2.322	-1.03									-1.03
														-1.96									-1.96
	-2.064	-2.064											-2.064
														-3.965									-3.965
	-1.681	-1.681											-1.681	-0.626									-0.626
	-0.511	-0.511											-0.511	-0.544									-0.544
	-1.116	-1.116											-1.116
	-1.858	-1.858											-1.858
														-0.9									-0.9
														-0.141									-0.141
	-1.339	-1.339											-1.339	-2.635									-2.635
	-2.41	-2.41											-2.41	-3.634									-3.634
	-0.736	-0.736											-0.736
														-0.351									-0.351
														-0.714									-0.714
	-1.841	-1.841											-1.841	-0.705									-0.705
	-1.626	-1.626											-1.626
	-4.531	-4.531											-4.531	-0.878									-0.878
														-0.151									-0.151
	-2.163	-2.163											-2.163
	-4.566	-4.566											-4.566
	-4.291	-4.291											-4.291	-0.329									-0.329
														-2.24									-2.24
														-1.726									-1.726
	-1.693	-1.693											-1.693	-1.617									-1.617
	-0.919	-0.919											-0.919	-1.715									-1.715
	-1.631	-1.631											-1.631
	-1.726	-1.726											-1.726	-0.17									-0.17
	-2.418	-2.418											-2.418	-0.897									-0.897
														-1.541									-1.541
														-1.412									-1.412
	-2.128	-2.128											-2.128	-3.228									-3.228
														-1.271									-1.271
														-1.83									-1.83
	-1.658	-1.658											-1.658	-3.395									-3.395
														-0.466									-0.466
	-1.207	-1.207											-1.207	-0.855									-0.855
	-1.119	-1.119											-1.119	-1.69									-1.69
	-2.264	-2.264											-2.264
	-1.039	-1.039											-1.039
	-0.404	-0.404											-0.404	-0.496									-0.496
														-0.829									-0.829
														-1.017									-1.017
	-1.269	-1.269											-1.269	-1.62									-1.62
														-1.198									-1.198
	-0.273	-0.273											-0.273	-1.405									-1.405
	-1.11	-1.11											-1.11
	-1.481	-1.481											-1.481	-0.521									-0.521
														-1.422									-1.422
	-0.873	-0.873											-0.873
														-0.719									-0.719
	-0.141	-0.141											-0.141	-1.135									-1.135
														-2.156									-2.156
	-0.923	-0.923											-0.923
														-2.438									-2.438
	-1.149	-1.149											-1.149	-2.965									-2.965
														-1.229									-1.229
														-0.149									-0.149
	-2.818	-2.818											-2.818
	-1.59	-1.59											-1.59
														-1.262									-1.262
	-0.904	-0.904											-0.904	-2.591									-2.591
	-5.271	-5.271											-5.271
	-1.858	-1.858											-1.858	-3.157									-3.157
	-0.323	-0.323											-0.323
														-2.087									-2.087
	-1.42	-1.42											-1.42	-0.977									-0.977
	-1.479	-1.479											-1.479	-1.688									-1.688
	-1.721	-1.721											-1.721
														-2.674									-2.674
	-1.618	-1.618											-1.618	-1.693									-1.693
														-0.555									-0.555
	-0.77	-0.77											-0.77	-1.037									-1.037
	-1.085	-1.085											-1.085	-1.381									-1.381
	-0.551	-0.551											-0.551	-0.933									-0.933
	-1.74	-1.74											-1.74	-1.925									-1.925
														-1.379									-1.379
														-1.602									-1.602
	-2.706	-2.706											-2.706	-1.072									-1.072
	-2.941	-2.941											-2.941	-1.843									-1.843
	-2.362	-2.362											-2.362
	-1.846	-1.846											-1.846	-1.793									-1.793
	-0.683	-0.683											-0.683	-0.858									-0.858
	-0.835	-0.835											-0.835
														-0.24									-0.24
	-3.131	-3.131											-3.131	-1.006									-1.006
														-0.958									-0.958
														-0.576									-0.576
														-1.218									-1.218
	-3.147	-3.147											-3.147
														-4.227									-4.227
	-1.138	-1.138											-1.138	-0.824									-0.824
	-1	-1											-1	-1.011									-1.011
	-1.028	-1.028											-1.028	-2.117									-2.117
	-3.2	-3.2											-3.2	-0.251									-0.251
	-1.77	-1.77											-1.77	-0.181									-0.181
	-3.011	-3.011											-3.011	-1.05									-1.05
	-0.267	-0.267											-0.267
	-1.253	-1.253											-1.253	-0.638									-0.638
	-1.383	-1.383											-1.383
	-1.672	-1.672											-1.672	-1.671									-1.671
	-2.87	-2.87											-2.87	-4.353									-4.353
	-3.167	-3.167											-3.167	-0.804									-0.804
	-0.94	-0.94											-0.94
	-0.739	-0.739											-0.739	-0.134									-0.134
														-0.659									-0.659
														-3.432									-3.432
	-1.565	-1.565											-1.565	-1.785									-1.785
														-2.286									-2.286
	-1.922	-1.922											-1.922	-0.178									-0.178
	-0.456	-0.456											-0.456	-0.892									-0.892
	-0.435	-0.435											-0.435
														-1.549									-1.549
														-1.435									-1.435
	-3.136	-3.136											-3.136	-2.758									-2.758
	-2.109	-2.109											-2.109	-0.228									-0.228
	-2.523	-2.523											-2.523
	-2.959	-2.959											-2.959	-3.833									-3.833
	-2.676	-2.676											-2.676	-0.946									-0.946
	-0.578	-0.578											-0.578	-3.734									-3.734
	-1.791	-1.791											-1.791	-3.538									-3.538
	-1.048	-1.048											-1.048	-3.111									-3.111
	-4.36	-4.36											-4.36	-3.855									-3.855
	-2.738	-2.738											-2.738	-3.15									-3.15
	-0.638	-0.638											-0.638
	-3.367	-3.367											-3.367	-0.585									-0.585
	-3.424	-3.424											-3.424
	-4.205	-4.205											-4.205	-1.405									-1.405
	-3.467	-3.467											-3.467	-0.945									-0.945
	-3.424	-3.424											-3.424	-1.867									-1.867
	-0.105	-0.105											-0.105	-0.904									-0.904
	-0.191	-0.191											-0.191
														-0.626									-0.626
														-0.578									-0.578
	-2.317	-2.317											-2.317
														-1.548									-1.548
	-0.69	-0.69											-0.69	-2.477									-2.477
	-0.251	-0.251											-0.251	-2.38									-2.38
														-3.241									-3.241
	-3.209	-3.209											-3.209	-0.699									-0.699
	-3.054	-3.054											-3.054	-0.988									-0.988
	-0.909	-0.909											-0.909	-2.735									-2.735
	-2.117	-2.117											-2.117
	-3.647	-3.647											-3.647
	-3.343	-3.343											-3.343	-1.481									-1.481
	-1.254	-1.254											-1.254	-1.088									-1.088
														-0.552									-0.552
	-2.228	-2.228											-2.228
	-1.646	-1.646											-1.646	-1.907									-1.907
	-2.231	-2.231											-2.231	-0.558									-0.558
	-1.128	-1.128											-1.128	-0.551									-0.551
	-1.564	-1.564											-1.564
	-0.534	-0.534											-0.534	-0.171									-0.171
														-0.468									-0.468
	-2.085	-2.085											-2.085
	-0.623	-0.623											-0.623	-3.461									-3.461
	-0.811	-0.811											-0.811	-4.225									-4.225
	-1.681	-1.681											-1.681	-1.909									-1.909
														-2.992									-2.992
	-3.097	-3.097											-3.097
	-0.953	-0.953											-0.953	-0.663									-0.663
														-1.486									-1.486
	-0.613	-0.613											-0.613	-2.635									-2.635
	-1.858	-1.858											-1.858	-0.851									-0.851
	-1.837	-1.837											-1.837
														-0.952									-0.952
	-0.243	-0.243											-0.243	-1.131									-1.131
	-5.166	-5.166											-5.166	-3.405									-3.405
														-3.411									-3.411
														-0.324									-0.324
	-2.169	-2.169											-2.169
	-0.232	-0.232											-0.232	-1.955									-1.955
	-0.422	-0.422											-0.422	-0.535									-0.535
	-0.939	-0.939											-0.939	-2.109									-2.109
	-1.643	-1.643											-1.643
	-0.667	-0.667											-0.667	-2.54									-2.54
														-1.21									-1.21
	-4.115	-4.115											-4.115
	-3.852	-3.852											-3.852	-0.264									-0.264
	-4.048	-4.048											-4.048	-2.509									-2.509
	-0.17	-0.17											-0.17	-0.801									-0.801
	-0.893	-0.893											-0.893	-1.008									-1.008
	-1.361	-1.361											-1.361
	-2.215	-2.215											-2.215
	-2.019	-2.019											-2.019	-1.187									-1.187
	-3.643	-3.643											-3.643	-1.145									-1.145
														-1.897									-1.897
	-1.303	-1.303											-1.303
	-1.059	-1.059											-1.059	-1.192									-1.192
														-2.294									-2.294
	-2.75	-2.75											-2.75
	-0.623	-0.623											-0.623
	-1.202	-1.202											-1.202	-1.051									-1.051
														-4.418									-4.418
														-1.915									-1.915
														-2.624									-2.624
														-4.187									-4.187
														-1.568									-1.568
	-2.345	-2.345											-2.345
	-4.374	-4.374											-4.374	-0.967									-0.967
	-1.742	-1.742											-1.742
	-0.708	-0.708											-0.708	-1.702									-1.702
														-0.369									-0.369
	-3.68	-3.68											-3.68
	-4.461	-4.461											-4.461	-0.731									-0.731
	-0.292	-0.292											-0.292	-2.229									-2.229
	-2.719	-2.719											-2.719
	-2.379	-2.379											-2.379	-1.577									-1.577
														-0.984									-0.984
														-0.107									-0.107
	-4.145	-4.145											-4.145	-1.1									-1.1
	-3.948	-3.948											-3.948	-0.381									-0.381
	-3.784	-3.784											-3.784	-2.799									-2.799
	-1.91	-1.91											-1.91	-0.207									-0.207
														-2.679									-2.679
	-2.991	-2.991											-2.991
	-2.327	-2.327											-2.327
	-3.441	-3.441											-3.441
	-3.423	-3.423											-3.423
	-1.046	-1.046											-1.046
	-0.694	-0.694											-0.694
	-2.93	-2.93											-2.93
	-3.792	-3.792											-3.792
	-0.481	-0.481											-0.481
	-0.223	-0.223											-0.223
	-0.705	-0.705											-0.705
	-1.894	-1.894											-1.894
	-4.671	-4.671											-4.671
	-2.476	-2.476											-2.476
	-1.569	-1.569											-1.569	-1.475									-1.475
	-2.11	-2.11											-2.11	-2.043									-2.043
	-0.491	-0.491											-0.491	-3.638									-3.638
														-1.442									-1.442
														-2.122									-2.122
	-2.914	-2.914											-2.914
														-4.087									-4.087
														-3.596									-3.596
														-3.172									-3.172
	-3.229	-3.229											-3.229	-1.689									-1.689
														-4.661									-4.661
	-0.268	-0.268											-0.268	-1.283									-1.283
	-2.565	-2.565											-2.565
	-2.309	-2.309											-2.309
	-1.778	-1.778											-1.778
	-0.751	-0.751											-0.751
	-1.354	-1.354											-1.354	-3.161									-3.161
	-1.454	-1.454											-1.454	-0.354									-0.354
	-1.742	-1.742											-1.742
	-2.005	-2.005											-2.005
	-1.502	-1.502											-1.502
	-0.535	-0.535											-0.535
	-1.188	-1.188											-1.188
	-0.431	-0.431											-0.431	-2.415									-2.415
														-1.048									-1.048
														-0.91									-0.91
														-2.732									-2.732
														-1.096									-1.096
														-3.858									-3.858
														-0.527									-0.527
														-1.506									-1.506
														-2.23									-2.23
														-4.879									-4.879
														-1.707									-1.707
														-1.188									-1.188
														-0.323									-0.323
														-4.241									-4.241
														-2.572									-2.572
														-0.921									-0.921
														-2.993									-2.993
														-0.167									-0.167
														-1.396									-1.396
														-2.351									-2.351
														-2.667									-2.667
														-1.971									-1.971
														-1.362									-1.362
														-0.428									-0.428
														-1.251									-1.251
														-1.204									-1.204
														-0.208									-0.208
														-1.611									-1.611
														-1.804									-1.804
														-3.518									-3.518
														-0.324									-0.324
														-0.876									-0.876
														-2.04									-2.04
														-2.604									-2.604
														-0.276									-0.276
														-1.845									-1.845
														-1.076									-1.076
														-1.52									-1.52
														-1.375									-1.375
														-0.503									-0.503
														-2.862									-2.862
														-2.979									-2.979
														-1.516									-1.516
														-0.975									-0.975
														-2.83									-2.83
														-3.35									-3.35
														-4.12									-4.12
														-3.936									-3.936
														-2.794									-2.794
														-0.872									-0.872
														-0.736									-0.736
														-1.338									-1.338
														-2.628									-2.628
														-1.283									-1.283
														-0.942									-0.942
														-2.951									-2.951
														-1.658									-1.658
														-0.771									-0.771
														-2.223									-2.223
														-1.401									-1.401
														-1.008									-1.008
														-3.884									-3.884
														-1.327									-1.327
														-2.326									-2.326
														-1.866									-1.866
														-2.679									-2.679
														-1.913									-1.913
														-1.674									-1.674
														-1.814									-1.814
														-1.159									-1.159
														-1.069									-1.069
														-1.661									-1.661
														-1.308									-1.308
														-0.956									-0.956
														-4.293									-4.293
														-0.848									-0.848
														-3.712									-3.712
														-1.039									-1.039
														-1.117									-1.117
														-1.138									-1.138
														-1.916									-1.916
														-0.78									-0.78
														-5.333									-5.333
														-1.6									-1.6
														-1.91									-1.91
														-0.602									-0.602
														-0.493									-0.493
														-0.62									-0.62
														-0.676									-0.676
														-0.873									-0.873
														-1.483									-1.483
														-1.566									-1.566
														-0.114									-0.114
														-2.339									-2.339
														-1.604									-1.604
														-0.949									-0.949
														-1.741									-1.741
														-1.872									-1.872
														-2.164									-2.164
														-1.746									-1.746
														-0.919									-0.919
														-1.497									-1.497
														-2.239									-2.239
														-1.852									-1.852
														-1.255									-1.255
														-2.5									-2.5
														-3.366									-3.366
														-2.191									-2.191
														-0.109									-0.109
														-4.663									-4.663
														-2.049									-2.049
														-1.196									-1.196
														-1.676									-1.676
														-2.107									-2.107
														-1.169									-1.169
														-2.561									-2.561
														-1.018									-1.018
														-2.759									-2.759
														-2.041									-2.041
														-2.925									-2.925
														-1.478									-1.478
														-1.509									-1.509
														-2.006									-2.006
														-2.823									-2.823
														-0.127									-0.127
														-2.323									-2.323
														-1.248									-1.248
														-1.681									-1.681
														-0.787									-0.787
														-2.804									-2.804
														-3.236									-3.236
														-3.184									-3.184
														-2.561									-2.561
														-0.825									-0.825
														-2.466									-2.466
														-0.168									-0.168
														-4.632									-4.632
														-0.963									-0.963
														-2.389									-2.389
														-0.794									-0.794
														-0.772									-0.772
														-1.75									-1.75
														-1.125									-1.125
														-0.942									-0.942
														-1.796									-1.796
														-2.622									-2.622
														-2.75									-2.75
														-2.185									-2.185
														-0.112									-0.112
														-0.505									-0.505
														-2.058									-2.058
														-0.977									-0.977
														-0.943									-0.943
														-0.364									-0.364
														-1.068									-1.068
														-1.935									-1.935
														-2.362									-2.362
														-1.708									-1.708
														-1.96									-1.96
														-1.769									-1.769
														-2.221									-2.221
														-1.276									-1.276
														-2.698									-2.698
														-2.158									-2.158
														-2.317									-2.317
														-1.575									-1.575
														-0.303									-0.303
														-1.704									-1.704
														-2.179									-2.179
														-1.351									-1.351
														-4.385									-4.385
														-2.114									-2.114
														-0.471									-0.471
														-3.82									-3.82
														-1.478									-1.478
														-1.262									-1.262
														-1.928									-1.928
														-3.416									-3.416
														-0.476									-0.476
														-1.899									-1.899
														-0.644									-0.644
														-1.934									-1.934
														-0.429									-0.429
														-1.9									-1.9
														-3.345									-3.345
														-1.234									-1.234
														-0.502									-0.502
														-2.036									-2.036
														-2.609									-2.609
														-0.944									-0.944
														-5.42									-5.42
														-1.109									-1.109
														-1.288									-1.288
														-2.859									-2.859
	-3.653	-3.653											-3.653	-2.942									-2.942
	-1.584	-1.584											-1.584
	-3.855	-3.855											-3.855	-2.706									-2.706
	-0.961	-0.961											-0.961	-1.343									-1.343
	-2.978	-2.978											-2.978	-0.476									-0.476
	-2.873	-2.873											-2.873	-0.684									-0.684
	-1.758	-1.758											-1.758
														-2.261									-2.261
														-0.291									-0.291
	-0.741	-0.741											-0.741	-2.126									-2.126
	-2.354	-2.354											-2.354	-0.983									-0.983
	-0.654	-0.654											-0.654
														-1.684									-1.684
	-0.958	-0.958											-0.958	-1.242									-1.242
	-2.452	-2.452											-2.452
	-1.165	-1.165											-1.165
	-3.456	-3.456											-3.456
	-1.584	-1.584											-1.584
														-3.634									-3.634
														-1.238									-1.238
	-4.459	-4.459											-4.459
	-2.277	-2.277											-2.277	-2.027									-2.027
														-1.272									-1.272
														-1.671									-1.671
														-1.137									-1.137
														-3.137									-3.137
														-0.603									-0.603
	-1.071	-1.071											-1.071
	-1.193	-1.193											-1.193
	-2.966	-2.966											-2.966
	-2.614	-2.614											-2.614
	-3.735	-3.735											-3.735	-0.599									-0.599
														-0.548									-0.548
														-2.746									-2.746
	-2.829	-2.829											-2.829	-0.864									-0.864
	-2.339	-2.339											-2.339	-1.714									-1.714
	-1.056	-1.056											-1.056	-1.417									-1.417
	-1.485	-1.485											-1.485	-0.898									-0.898
	-3.617	-3.617											-3.617	-2.195									-2.195
	-2.94	-2.94											-2.94
	-2.955	-2.955											-2.955	-1.946									-1.946
	-2.52	-2.52											-2.52	-3.573									-3.573
	-0.517	-0.517											-0.517	-2.116									-2.116
														-3.22									-3.22
														-0.191									-0.191
	-1.647	-1.647											-1.647
	-5.126	-5.126											-5.126	-1.474									-1.474
	-0.823	-0.823											-0.823	-1.291									-1.291
														-2.263									-2.263
														-1.66									-1.66
	-1.482	-1.482											-1.482
														-1.039									-1.039
														-0.518									-0.518
														-2.211									-2.211
	-1.915	-1.915											-1.915
	-0.608	-0.608											-0.608	-2.903									-2.903
	-3.023	-3.023											-3.023	-1.85									-1.85
	-0.98	-0.98											-0.98
	-4.356	-4.356											-4.356
	-2.802	-2.802											-2.802
	-4.24	-4.24											-4.24
	-0.198	-0.198											-0.198	-0.384									-0.384
	-0.226	-0.226											-0.226
	-4.225	-4.225											-4.225	-2.652									-2.652
	-1.233	-1.233											-1.233
	-1.611	-1.611											-1.611	-2.98									-2.98
														-2.116									-2.116
	-0.13	-0.13											-0.13	-2.204									-2.204
	-3.615	-3.615											-3.615	-1.227									-1.227
	-1.423	-1.423											-1.423	-0.831									-0.831
	-0.216	-0.216											-0.216	-2.586									-2.586
	-1.54	-1.54											-1.54	-2.18									-2.18
														-0.837									-0.837
	-2.206	-2.206											-2.206	-2.119									-2.119
														-0.64									-0.64
														-2.121									-2.121
	-3.618	-3.618											-3.618	-2.417									-2.417
	-0.976	-0.976											-0.976	-2.17									-2.17
	-2.364	-2.364											-2.364	-2.354									-2.354
														-1.908									-1.908
														-2.163									-2.163
														-1.673									-1.673
														-1.041									-1.041
														-1.668									-1.668
														-1.775									-1.775
														-2.58									-2.58
														-1.245									-1.245
	-0.161	-0.161											-0.161
														-0.938									-0.938
	-1.932	-1.932											-1.932	-0.293									-0.293
	-1.865	-1.865											-1.865	-0.235									-0.235
	-0.765	-0.765											-0.765	-0.236									-0.236
	-0.236	-0.236											-0.236
	-1.568	-1.568											-1.568	-1.742									-1.742
														-1.111									-1.111
	-1.165	-1.165											-1.165
	-0.949	-0.949											-0.949
	-1.692	-1.692											-1.692
														-2.401									-2.401
	-3.656	-3.656											-3.656
	-2.524	-2.524											-2.524
														-1.486									-1.486
	-1.215	-1.215											-1.215
	-2.115	-2.115											-2.115
	-0.738	-0.738											-0.738
	-0.931	-0.931											-0.931	-2.715									-2.715
	-2.151	-2.151											-2.151	-0.715									-0.715
	-0.959	-0.959											-0.959	-1.538									-1.538
														-1.666									-1.666
	-1.108	-1.108											-1.108
	-1.564	-1.564											-1.564	-0.437									-0.437
	-1.983	-1.983											-1.983	-0.766									-0.766
	-1.847	-1.847											-1.847	-1.393									-1.393
														-1.402									-1.402
	-2.886	-2.886											-2.886
														-0.223									-0.223
	-2.836	-2.836											-2.836
	-3.273	-3.273											-3.273
	-1.319	-1.319											-1.319
	-1.838	-1.838											-1.838	-2.101									-2.101
	-2.52	-2.52											-2.52
														-2.641									-2.641
	-1.835	-1.835											-1.835	-5.427									-5.427
														-0.167									-0.167
														-6.258									-6.258
														-0.856									-0.856
														-1.014									-1.014
	-3.855	-3.855											-3.855	-1.269									-1.269
	-3.834	-3.834											-3.834
	-3.698	-3.698											-3.698
	-1.094	-1.094											-1.094
	-2.154	-2.154											-2.154
	-0.993	-0.993											-0.993
														-2.571									-2.571
														-3.32									-3.32
	-1.725	-1.725											-1.725	-0.486									-0.486
														-0.727									-0.727
	-0.743	-0.743											-0.743
	-1.11	-1.11											-1.11
	-3.774	-3.774											-3.774
														-0.264									-0.264
	-3.274	-3.274											-3.274	-1.33									-1.33
	-1.293	-1.293											-1.293	-2.059									-2.059
														-0.252									-0.252
	-2.967	-2.967											-2.967	-0.315									-0.315
														-1.834									-1.834
														-1.613									-1.613
	-1.895	-1.895											-1.895	-1.544									-1.544
	-1.993	-1.993											-1.993	-2.783									-2.783
	-2.97	-2.97											-2.97	-1.263									-1.263
	-1.267	-1.267											-1.267
	-2.886	-2.886											-2.886	-1.159									-1.159
	-1.017	-1.017											-1.017
														-1.423									-1.423
	-0.65	-0.65											-0.65
	-0.157	-0.157											-0.157
	-3.057	-3.057											-3.057
	-2.095	-2.095											-2.095	-1.434									-1.434
	-3.506	-3.506											-3.506
	-0.234	-0.234											-0.234	-0.311									-0.311
	-0.33	-0.33											-0.33
	-0.382	-0.382											-0.382	-0.212									-0.212
														-0.324									-0.324
														-1.968									-1.968
	-3.681	-3.681											-3.681	-1.921									-1.921
	-2.934	-2.934											-2.934
														-3.928									-3.928
														-2.973									-2.973
	-1.808	-1.808											-1.808	-2.399									-2.399
	-1.142	-1.142											-1.142
	-1.336	-1.336											-1.336	-0.206									-0.206
	-4.321	-4.321											-4.321
														-0.892									-0.892
														-1.567									-1.567
	-3.774	-3.774											-3.774
	-1.514	-1.514											-1.514
	-2.84	-2.84											-2.84
	-1.686	-1.686											-1.686
														-0.472									-0.472
														-0.617									-0.617
	-2.445	-2.445											-2.445	-3.041									-3.041
	-0.998	-0.998											-0.998	-2.298									-2.298
														-0.479									-0.479
	-4.226	-4.226											-4.226	-1.699									-1.699
														-3.296									-3.296
	-2.93	-2.93											-2.93	-4.913									-4.913
	-1.212	-1.212											-1.212
														-5.153									-5.153
	-0.63	-0.63											-0.63	-2.055									-2.055
														-1.093									-1.093
	-2.56	-2.56											-2.56
	-2.066	-2.066											-2.066
	-2.576	-2.576											-2.576
	-3.959	-3.959											-3.959
	-2.668	-2.668											-2.668
														-4.395									-4.395
														-3.392									-3.392
	-1.603	-1.603											-1.603
														-0.57									-0.57
	-0.238	-0.238											-0.238	-2.501									-2.501
														-2.236									-2.236
	-5.558	-5.558											-5.558	-0.63									-0.63
	-1.543	-1.543											-1.543	-2.78									-2.78
	-2.668	-2.668											-2.668	-2.754									-2.754
														-0.821									-0.821
	-1.973	-1.973											-1.973
	-3.798	-3.798											-3.798
														-0.945									-0.945
														-1.027									-1.027
	-5.089	-5.089											-5.089
	-2.367	-2.367											-2.367
														-2.34									-2.34
	-1.602	-1.602											-1.602	-2.416									-2.416
	-1.049	-1.049											-1.049
														-1.571									-1.571
														-0.287									-0.287
	-0.287	-0.287											-0.287
														-0.268									-0.268
														-2.938									-2.938
														-5.453									-5.453
														-5.643									-5.643
														-2.665									-2.665
														-1.672									-1.672
	-1.755	-1.755											-1.755	-1.529									-1.529
	-1.278	-1.278											-1.278
	-4.991	-4.991											-4.991
	-1.178	-1.178											-1.178
	-0.446	-0.446											-0.446	-1.603									-1.603
	-0.993	-0.993											-0.993
	-0.51	-0.51											-0.51
	-0.558	-0.558											-0.558	-1.228									-1.228
	-0.935	-0.935											-0.935	-2.057									-2.057
														-2.661									-2.661
	-0.144	-0.144											-0.144
														-1.567									-1.567
														-3.424									-3.424
														-2.004									-2.004
														-3.637									-3.637
	-4.261	-4.261											-4.261
	-3.917	-3.917											-3.917
	-0.569	-0.569											-0.569
	-4.858	-4.858											-4.858
														-5.854									-5.854
	-2.354	-2.354											-2.354	-1.318									-1.318
														-2.902									-2.902
	-4.036	-4.036											-4.036	-0.727									-0.727
	-2.209	-2.209											-2.209
														-2.968									-2.968
														-5.439									-5.439
	-5.246	-5.246											-5.246
														-0.827									-0.827
														-2.874									-2.874
	-6.147	-6.147											-6.147	-3.69									-3.69
	-3.669	-3.669											-3.669
	-2.817	-2.817											-2.817	-1.742									-1.742
	-0.517	-0.517											-0.517
	-0.795	-0.795											-0.795
	-1.292	-1.292											-1.292	-2.21									-2.21
	-1.645	-1.645											-1.645	-0.437									-0.437
	-1.117	-1.117											-1.117	-1.251									-1.251
														-2.627									-2.627
	-1.009	-1.009											-1.009
														-3.595									-3.595
														-0.167									-0.167
	-1.431	-1.431											-1.431	-0.345									-0.345
	-1.604	-1.604											-1.604	-0.927									-0.927
	-0.636	-0.636											-0.636	-1.339									-1.339
	-1.469	-1.469											-1.469
	-2.436	-2.436											-2.436
	-0.446	-0.446											-0.446
														-2.388									-2.388
														-3.184									-3.184
	-0.556	-0.556											-0.556	-1.57									-1.57
	-2.006	-2.006											-2.006
	-1.416	-1.416											-1.416	-1.934									-1.934
	-0.446	-0.446											-0.446	-2.69									-2.69
	-2.953	-2.953											-2.953
	-1.712	-1.712											-1.712
	-0.594	-0.594											-0.594	-1.654									-1.654
														-3.581									-3.581
	-2.558	-2.558											-2.558	-3.248									-3.248
														-1.716									-1.716
														-2.498									-2.498
														-1.024									-1.024
														-0.64									-0.64
	-3.058	-3.058											-3.058	-2.669									-2.669
	-0.515	-0.515											-0.515
	-1.398	-1.398											-1.398
	-1.43	-1.43											-1.43	-2.669									-2.669
	-0.198	-0.198											-0.198	-5.784									-5.784
	-0.93	-0.93											-0.93	-0.849									-0.849
	-2.209	-2.209											-2.209	-1.521									-1.521
	-2.403	-2.403											-2.403	-1.454									-1.454
	-1.45	-1.45											-1.45
	-1.798	-1.798											-1.798
	-2.518	-2.518											-2.518
	-3.081	-3.081											-3.081
	-1.887	-1.887											-1.887	-0.963									-0.963
	-2.584	-2.584											-2.584	-1.654									-1.654
	-1.578	-1.578											-1.578	-1.803									-1.803
	-0.878	-0.878											-0.878	-2.042									-2.042
	-2.288	-2.288											-2.288
	-2.284	-2.284											-2.284	-3.017									-3.017
	-1.629	-1.629											-1.629
	-2.637	-2.637											-2.637	-2.852									-2.852
														-3.214									-3.214
	-0.457	-0.457											-0.457	-3.15									-3.15
														-2.39									-2.39
														-0.422									-0.422
	-0.114	-0.114											-0.114
	-2.86	-2.86											-2.86	-0.563									-0.563
	-0.698	-0.698											-0.698
	-2.13	-2.13											-2.13	-3.375									-3.375
	-1.575	-1.575											-1.575
	-1.631	-1.631											-1.631	-1.731									-1.731
														-2.771									-2.771
	-1.106	-1.106											-1.106
	-1.276	-1.276											-1.276	-2.478									-2.478
	-4.224	-4.224											-4.224	-1.605									-1.605
	-1.318	-1.318											-1.318	-3.411									-3.411
														-3.745									-3.745
	-1.558	-1.558											-1.558
	-2.71	-2.71											-2.71	-0.437									-0.437
	-1.777	-1.777											-1.777
	-1.61	-1.61											-1.61	-1.07									-1.07
	-3.654	-3.654											-3.654	-1.293									-1.293
	-1.381	-1.381											-1.381	-1.59									-1.59
														-1.097									-1.097
	-4.589	-4.589											-4.589	-3.223									-3.223
	-5.204	-5.204											-5.204	-2.866									-2.866
	-0.198	-0.198											-0.198
														-1.763									-1.763
														-1.439									-1.439
														-2.785									-2.785
	-0.79	-0.79											-0.79
	-1.708	-1.708											-1.708	-1.33									-1.33
	-2.352	-2.352											-2.352
														-1.644									-1.644
	-2.406	-2.406											-2.406
	-1.542	-1.542											-1.542
														-5.108									-5.108
														-2.711									-2.711
	-2.411	-2.411											-2.411
	-1.053	-1.053											-1.053
	-2.549	-2.549											-2.549
	-2.64	-2.64											-2.64
	-2.488	-2.488											-2.488	-0.757									-0.757
	-0.504	-0.504											-0.504	-0.472									-0.472
														-4.331									-4.331
														-5.208									-5.208
														-1.604									-1.604
														-1.787									-1.787
	-2.123	-2.123											-2.123
	-2.068	-2.068											-2.068	-2.897									-2.897
														-0.431									-0.431
														-2.091									-2.091
	-1.59	-1.59											-1.59	-2.118									-2.118
	-2.831	-2.831											-2.831	-2.302									-2.302
	-4.062	-4.062											-4.062
														-2.533									-2.533
														-0.514									-0.514
	-3.178	-3.178											-3.178	-1.401									-1.401
	-0.113	-0.113											-0.113
														-1.57									-1.57
														-2.505									-2.505
	-1.576	-1.576											-1.576
	-1.479	-1.479											-1.479
	-3.679	-3.679											-3.679
														-0.615									-0.615
														-0.22									-0.22
	-0.574	-0.574											-0.574	-0.688									-0.688
	-0.464	-0.464											-0.464
	-0.129	-0.129											-0.129	-1.194									-1.194
	-1.234	-1.234											-1.234
	-0.492	-0.492											-0.492	-2.406									-2.406
	-0.502	-0.502											-0.502
	-2.677	-2.677											-2.677
	-0.453	-0.453											-0.453
														-0.829									-0.829
														-0.623									-0.623
														-0.539									-0.539
	-0.796	-0.796											-0.796	-0.838									-0.838
														-1.061									-1.061
														-2.542									-2.542
	-0.152	-0.152											-0.152	-0.265									-0.265
	-4.586	-4.586											-4.586	-0.968									-0.968
	-1.782	-1.782											-1.782
														-0.503									-0.503
	-5.397	-5.397											-5.397	-0.383									-0.383
	-5.71	-5.71											-5.71	-0.259									-0.259
	-3.939	-3.939											-3.939	-1.734									-1.734
	-6.014	-6.014											-6.014
	-4.738	-4.738											-4.738	-1.197									-1.197
														-1.176									-1.176
	-2.135	-2.135											-2.135	-2.79									-2.79
	-5.011	-5.011											-5.011	-0.65									-0.65
														-1.138									-1.138
														-0.525									-0.525
	-4.811	-4.811											-4.811
														-0.608									-0.608
	-1.893	-1.893											-1.893	-2.049									-2.049
														-1.481									-1.481
														-2.085									-2.085
	-0.977	-0.977											-0.977
	-0.702	-0.702											-0.702	-0.67									-0.67
	-1.108	-1.108											-1.108	-1.2									-1.2
	-2.343	-2.343											-2.343	-0.121									-0.121
	-0.538	-0.538											-0.538
	-0.687	-0.687											-0.687
	-2.704	-2.704											-2.704	-1.844									-1.844
	-2.809	-2.809											-2.809	-0.686									-0.686
	-4.144	-4.144											-4.144	-1.962									-1.962
														-0.611									-0.611
	-0.94	-0.94											-0.94
														-1.783									-1.783
	-2.13	-2.13											-2.13
	-2.232	-2.232											-2.232
														-1.298									-1.298
	-3.642	-3.642											-3.642	-1.569									-1.569
														-1.093									-1.093
	-2.276	-2.276											-2.276	-0.955									-0.955
	-0.115	-0.115											-0.115	-3.626									-3.626
														-0.945									-0.945
														-2.218									-2.218
														-2.914									-2.914
														-0.691									-0.691
														-2.625									-2.625
	-1.798	-1.798											-1.798
	-0.824	-0.824											-0.824
	-1.338	-1.338											-1.338
	-1.64	-1.64											-1.64
	-0.733	-0.733											-0.733
	-1.643	-1.643											-1.643
	-1.264	-1.264											-1.264
	-2.342	-2.342											-2.342
	-1.495	-1.495											-1.495
	-0.786	-0.786											-0.786
														-3.058									-3.058
														-2.18									-2.18
	-1.888	-1.888											-1.888	-3.44									-3.44
	-1.546	-1.546											-1.546	-2.729									-2.729
														-3.711									-3.711
	-2.817	-2.817											-2.817	-3.495									-3.495
														-1.657									-1.657
	-1.567	-1.567											-1.567	-2.745									-2.745
														-2.574									-2.574
														-5.065									-5.065
														-4.515									-4.515
	-2.125	-2.125											-2.125
	-3.479	-3.479											-3.479
	-2.98	-2.98											-2.98
	-0.867	-0.867											-0.867
	-1.643	-1.643											-1.643
	-2.599	-2.599											-2.599	-1.551									-1.551
	-1.148	-1.148											-1.148	-1.584									-1.584
	-0.401	-0.401											-0.401	-1.856									-1.856
	-3.635	-3.635											-3.635
	-2.886	-2.886											-2.886
	-1.577	-1.577											-1.577	-1.516									-1.516
	-1.643	-1.643											-1.643	-6.752									-6.752
	-1.719	-1.719											-1.719	-2.057									-2.057
														-1.478									-1.478
														-0.753									-0.753
														-2.307									-2.307
														-5.559									-5.559
	-2.499	-2.499											-2.499	-3.871									-3.871
	-2.134	-2.134											-2.134
	-3.075	-3.075											-3.075	-2.32									-2.32
	-3.028	-3.028											-3.028	-0.502									-0.502
														-0.899									-0.899
														-2.814									-2.814
	-0.208	-0.208											-0.208	-2.137									-2.137
	-2.287	-2.287											-2.287
	-0.942	-0.942											-0.942	-1.898									-1.898
	-1.187	-1.187											-1.187
	-0.923	-0.923											-0.923
	-0.232	-0.232											-0.232	-3.084									-3.084
	-1.876	-1.876											-1.876	-2.534									-2.534
	-1.313	-1.313											-1.313	-2.482									-2.482
														-2.222									-2.222
	-1.852	-1.852											-1.852
														-2.699									-2.699
	-1.876	-1.876											-1.876	-1.721									-1.721
														-0.401									-0.401
	-1.489	-1.489											-1.489
	-4.02	-4.02											-4.02
														-1.115									-1.115
	-1.036	-1.036											-1.036
	-1.145	-1.145											-1.145
	-1.854	-1.854											-1.854
														-1.287									-1.287
														-2.368									-2.368
	-0.689	-0.689											-0.689	-0.728									-0.728
	-1.622	-1.622											-1.622	-2.887									-2.887
	-2.122	-2.122											-2.122	-1.46									-1.46
														-1.975									-1.975
														-1.179									-1.179
	-3.808	-3.808											-3.808
														-0.991									-0.991
	-0.841	-0.841											-0.841
	-0.493	-0.493											-0.493
	-0.937	-0.937											-0.937
	-3.694	-3.694											-3.694
	-2.958	-2.958											-2.958	-2.402									-2.402
	-0.309	-0.309											-0.309	-0.137									-0.137
	-1.626	-1.626											-1.626	-1.798									-1.798
	-3.394	-3.394											-3.394	-2.023									-2.023
	-3.45	-3.45											-3.45	-2.229									-2.229
														-2.566									-2.566
														-2.183									-2.183
	-4.011	-4.011											-4.011
	-2.986	-2.986											-2.986
	-1.754	-1.754											-1.754	-2.114									-2.114
														-0.237									-0.237
	-2.963	-2.963											-2.963
														-4.597									-4.597
	-4.011	-4.011											-4.011
	-2.267	-2.267											-2.267	-2.462									-2.462
	-3.566	-3.566											-3.566	-1.02									-1.02
	-2.05	-2.05											-2.05	-2.399									-2.399
														-1.857									-1.857
														-0.328									-0.328
														-3.854									-3.854
	-3.225	-3.225											-3.225
														-0.529									-0.529
	-1.668	-1.668											-1.668
	-3.21	-3.21											-3.21	-0.669									-0.669
	-1.826	-1.826											-1.826
														-2.087									-2.087
	-5.408	-5.408											-5.408
	-6.135	-6.135											-6.135
	-4.334	-4.334											-4.334
	-5.906	-5.906											-5.906
	-4.109	-4.109											-4.109
	-0.276	-0.276											-0.276
	-0.67	-0.67											-0.67
	-3.735	-3.735											-3.735	-1.448									-1.448
														-1.293									-1.293
	-3.233	-3.233											-3.233	-1.027									-1.027
														-1.237									-1.237
	-1.653	-1.653											-1.653	-2.414									-2.414
	-2.233	-2.233											-2.233	-3.233									-3.233
	-3.775	-3.775											-3.775	-0.851									-0.851
	-2.551	-2.551											-2.551	-2.321									-2.321
	-1.732	-1.732											-1.732
	-1.393	-1.393											-1.393
	-0.412	-0.412											-0.412
	-2.014	-2.014											-2.014
	-1.897	-1.897											-1.897
	-0.983	-0.983											-0.983	-1.614									-1.614
	-1	-1											-1	-1.194									-1.194
	-0.268	-0.268											-0.268	-1.514									-1.514
	-1.648	-1.648											-1.648	-0.402									-0.402
	-2.136	-2.136											-2.136	-1.822									-1.822
	-0.892	-0.892											-0.892
	-1.69	-1.69											-1.69
	-1.07	-1.07											-1.07
	-0.26	-0.26											-0.26
	-1.463	-1.463											-1.463	-1.752									-1.752
	-2.031	-2.031											-2.031	-3.284									-3.284
	-2.787	-2.787											-2.787
														-0.427									-0.427
	-3.078	-3.078											-3.078	-2.518									-2.518
														-0.962									-0.962
	-0.963	-0.963											-0.963
	-1.523	-1.523											-1.523
	-1.676	-1.676											-1.676
														-2.711									-2.711
	-1.043	-1.043											-1.043	-2.108									-2.108
	-2.689	-2.689											-2.689	-1.775									-1.775
	-2.081	-2.081											-2.081
														-1.489									-1.489
														-1.893									-1.893
														-0.99									-0.99
														-1.482									-1.482
	-2.907	-2.907											-2.907	-1.723									-1.723
	-5.97	-5.97											-5.97
	-2.021	-2.021											-2.021	-1.947									-1.947
	-0.711	-0.711											-0.711	-0.185									-0.185
	-0.644	-0.644											-0.644
	-0.501	-0.501											-0.501
	-2.301	-2.301											-2.301
	-0.767	-0.767											-0.767	-1.582									-1.582
	-0.86	-0.86											-0.86
														-1.339									-1.339
	-1.686	-1.686											-1.686
	-1.367	-1.367											-1.367
	-2.048	-2.048											-2.048
	-0.501	-0.501											-0.501	-1.832									-1.832
	-2.708	-2.708											-2.708	-2.678									-2.678
	-2.496	-2.496											-2.496
														-3.019									-3.019
														-0.152									-0.152
														-1.645									-1.645
	-1.778	-1.778											-1.778	-1.246									-1.246
														-0.638									-0.638
	-2.459	-2.459											-2.459	-1.841									-1.841
	-2.348	-2.348											-2.348
	-3.747	-3.747											-3.747	-4.08									-4.08
	-0.335	-0.335											-0.335
	-1.777	-1.777											-1.777
														-1.952									-1.952
	-4.925	-4.925											-4.925	-0.88									-0.88
	-4.253	-4.253											-4.253
														-2.325									-2.325
	-2.063	-2.063											-2.063
	-0.84	-0.84											-0.84
	-1.171	-1.171											-1.171	-1.819									-1.819
	-2.677	-2.677											-2.677
	-1.46	-1.46											-1.46
	-1.004	-1.004											-1.004	-1.93									-1.93
	-0.833	-0.833											-0.833	-2.944									-2.944
	-2.77	-2.77											-2.77	-2.218									-2.218
														-2.848									-2.848
	-1.029	-1.029											-1.029	-1.959									-1.959
														-2.141									-2.141
	-0.389	-0.389											-0.389	-3.469									-3.469
														-2.026									-2.026
														-3.455									-3.455
														-3.542									-3.542
														-2.956									-2.956
	-1.257	-1.257											-1.257	-3.254									-3.254
	-1.799	-1.799											-1.799
	-1.645	-1.645											-1.645	-1.718									-1.718
	-2.43	-2.43											-2.43	-1.115									-1.115
	-2.52	-2.52											-2.52	-1.5									-1.5
														-0.65									-0.65
	-2.674	-2.674											-2.674	-3.398									-3.398
														-3.251									-3.251
	-0.588	-0.588											-0.588	-1.834									-1.834
														-0.994									-0.994
														-5.215									-5.215
														-0.248									-0.248
	-2.853	-2.853											-2.853
	-1.337	-1.337											-1.337
														-1.858									-1.858
	-3.371	-3.371											-3.371	-0.837									-0.837
	-0.198	-0.198											-0.198	-2.295									-2.295
	-1.7	-1.7											-1.7	-1.238									-1.238
	-2.739	-2.739											-2.739	-2.117									-2.117
	-0.624	-0.624											-0.624	-0.618									-0.618
	-2.102	-2.102											-2.102
	-2.052	-2.052											-2.052
	-3.8	-3.8											-3.8
	-2.719	-2.719											-2.719
	-3.21	-3.21											-3.21
														-0.699									-0.699
	-3.638	-3.638											-3.638
														-0.957									-0.957
	-2.297	-2.297											-2.297	-2.841									-2.841
	-2.421	-2.421											-2.421
	-0.991	-0.991											-0.991	-0.586									-0.586
														-0.484									-0.484
														-1.042									-1.042
	-2.277	-2.277											-2.277
														-1.892									-1.892
														-2.333									-2.333
	-0.669	-0.669											-0.669	-0.973									-0.973
														-3.737									-3.737
														-0.424									-0.424
	-1.902	-1.902											-1.902	-1.939									-1.939
														-2.118									-2.118
														-0.349									-0.349
														-3.739									-3.739
	-1.88	-1.88											-1.88	-3.655									-3.655
	-0.868	-0.868											-0.868
	-0.834	-0.834											-0.834	-0.242									-0.242
	-2.047	-2.047											-2.047	-0.975									-0.975
	-0.592	-0.592											-0.592
	-0.847	-0.847											-0.847
	-1.941	-1.941											-1.941	-2.643									-2.643
	-1.147	-1.147											-1.147
	-1.438	-1.438											-1.438	-1.881									-1.881
														-2.136									-2.136
														-0.894									-0.894
														-3.609									-3.609
	-0.295	-0.295											-0.295
	-2.476	-2.476											-2.476	-1.89									-1.89
	-1.095	-1.095											-1.095	-3.016									-3.016
	-2.183	-2.183											-2.183	-1.128									-1.128
	-1.577	-1.577											-1.577
	-1.566	-1.566											-1.566
	-2.006	-2.006											-2.006	-1.656									-1.656
	-1.616	-1.616											-1.616
														-1.111									-1.111
	-1.202	-1.202											-1.202
	-1.248	-1.248											-1.248
														-1.803									-1.803
														-2.204									-2.204
														-1.221									-1.221
														-1.251									-1.251
														-1.119									-1.119
														-2.498									-2.498
														-1.81									-1.81
														-0.963									-0.963
														-2.337									-2.337
														-0.511									-0.511
														-1.271									-1.271
														-1.283									-1.283
														-1.723									-1.723
														-1.102									-1.102
														-1.226									-1.226
														-0.451									-0.451
														-0.878									-0.878
														-0.321									-0.321
														-2.733									-2.733
														-1.222									-1.222
														-1.295									-1.295
														-1.729									-1.729
														-2.247									-2.247
														-3.147									-3.147
														-1.97									-1.97
														-3.263									-3.263
														-3.041									-3.041
														-4.157									-4.157
														-0.891									-0.891
														-2.976									-2.976
														-1.258									-1.258
														-1.375									-1.375
														-1.346									-1.346
														-1.71									-1.71
														-0.998									-0.998
														-3.589									-3.589
														-0.237									-0.237
														-0.573									-0.573
														-3.12									-3.12
														-3.505									-3.505
														-1.231									-1.231
														-4.619									-4.619
														-2.507									-2.507
														-1.337									-1.337
														-2.343									-2.343
														-1.468									-1.468
	-2.03	-2.03											-2.03	-1.346									-1.346
	-2.576	-2.576											-2.576
	-1.409	-1.409											-1.409
	-1.079	-1.079											-1.079
	-0.282	-0.282											-0.282
	-0.591	-0.591											-0.591
	-1.937	-1.937											-1.937
	-1.02	-1.02											-1.02
	-0.745	-0.745											-0.745	-3.709									-3.709
	-1.941	-1.941											-1.941	-3.14									-3.14
														-2.694									-2.694
														-1.533									-1.533
														-0.191									-0.191
	-2.943	-2.943											-2.943	-2.902									-2.902
	-2.486	-2.486											-2.486
														-1.731									-1.731
	-1.474	-1.474											-1.474	-2.239									-2.239
	-2.632	-2.632											-2.632	-2.552									-2.552
	-2.394	-2.394											-2.394	-3.872									-3.872
	-0.602	-0.602											-0.602	-3.21									-3.21
														-3.14									-3.14
														-2.26									-2.26
	-1.177	-1.177											-1.177	-0.115									-0.115
	-1.141	-1.141											-1.141	-4.263									-4.263
	-0.536	-0.536											-0.536	-0.38									-0.38
	-1.673	-1.673											-1.673	-2.957									-2.957
	-1.474	-1.474											-1.474	-2.649									-2.649
	-0.735	-0.735											-0.735	-4.013									-4.013
	-2.831	-2.831											-2.831
														-1.216									-1.216
	-5.107	-5.107											-5.107
														-4.28									-4.28
	-4.59	-4.59											-4.59
														-2.27									-2.27
	-6.252	-6.252											-6.252	-3.253									-3.253
	-3.248	-3.248											-3.248	-3.167									-3.167
	-2.824	-2.824											-2.824
	-2.081	-2.081											-2.081	-0.638									-0.638
	-0.759	-0.759											-0.759
	-1.146	-1.146											-1.146
	-4.331	-4.331											-4.331	-0.955									-0.955
														-0.704									-0.704
														-0.376									-0.376
														-0.141									-0.141
														-0.892									-0.892
	-1.802	-1.802											-1.802
	-2.685	-2.685											-2.685	-3									-3
														-3.477									-3.477
	-3.781	-3.781											-3.781	-0.178									-0.178
	-2.13	-2.13											-2.13	-3.643									-3.643
														-1.264									-1.264
														-1.444									-1.444
	-1.144	-1.144											-1.144
	-1.109	-1.109											-1.109	-0.574									-0.574
														-1.457									-1.457
	-2.199	-2.199											-2.199
														-1.339									-1.339
														-0.462									-0.462
	-2.344	-2.344											-2.344
	-1.155	-1.155											-1.155
	-1.229	-1.229											-1.229	-3.385									-3.385
														-1.94									-1.94
	-1.476	-1.476											-1.476	-2.153									-2.153
	-1.448	-1.448											-1.448
	-0.602	-0.602											-0.602	-2.418									-2.418
	-4.319	-4.319											-4.319
														-3.791									-3.791
														-2.28									-2.28
	-2.271	-2.271											-2.271	-1.663									-1.663
	-2.591	-2.591											-2.591	-2.393									-2.393
														-4.107									-4.107
	-2.5	-2.5											-2.5
	-2.144	-2.144											-2.144
	-2.68	-2.68											-2.68
	-1.16	-1.16											-1.16
	-3.643	-3.643											-3.643
														-1.116									-1.116
	-0.596	-0.596											-0.596	-2.264									-2.264
	-1.15	-1.15											-1.15	-1.339									-1.339
														-0.885									-0.885
														-2.038									-2.038
														-2.425									-2.425
														-3.943									-3.943
	-1.22	-1.22											-1.22
	-3.529	-3.529											-3.529
														-0.436									-0.436
	-1.15	-1.15											-1.15	-2.527									-2.527
	-0.988	-0.988											-0.988
	-1.893	-1.893											-1.893	-1.621									-1.621
	-1.489	-1.489											-1.489
	-1.039	-1.039											-1.039	-1.148									-1.148
	-2.722	-2.722											-2.722	-2.765									-2.765
	-1.608	-1.608											-1.608	-1.468									-1.468
														-1.532									-1.532
	-3.411	-3.411											-3.411	-0.648									-0.648
	-0.922	-0.922											-0.922	-1.996									-1.996
	-1.553	-1.553											-1.553
	-2.233	-2.233											-2.233
	-1.171	-1.171											-1.171	-1.225									-1.225
	-2.365	-2.365											-2.365	-2.215									-2.215
	-0.569	-0.569											-0.569	-2.209									-2.209
														-1.186									-1.186
														-2.232									-2.232
	-3.106	-3.106											-3.106
														-1.492									-1.492
	-0.518	-0.518											-0.518
	-3.81	-3.81											-3.81
	-1.059	-1.059											-1.059
	-0.379	-0.379											-0.379
														-2.654									-2.654
														-0.42									-0.42
														-2.63									-2.63
														-2.461									-2.461
	-1.242	-1.242											-1.242	-1.152									-1.152
	-2.359	-2.359											-2.359
	-0.807	-0.807											-0.807	-1.499									-1.499
														-2.574									-2.574
	-1.106	-1.106											-1.106
	-0.405	-0.405											-0.405
	-1.989	-1.989											-1.989
	-1.196	-1.196											-1.196
														-0.547									-0.547
	-2.252	-2.252											-2.252	-0.412									-0.412
	-3.767	-3.767											-3.767
	-2.251	-2.251											-2.251	-2.23									-2.23
														-3.901									-3.901
														-2.358									-2.358
	-0.305	-0.305											-0.305
														-0.338									-0.338
	-0.678	-0.678											-0.678	-2.068									-2.068
														-2.095									-2.095
	-1.055	-1.055											-1.055	-2.459									-2.459
	-1.634	-1.634											-1.634
														-2.355									-2.355
	-0.421	-0.421											-0.421
	-2.228	-2.228											-2.228
	-1.211	-1.211											-1.211
	-1.534	-1.534											-1.534	-0.365									-0.365
	-1.092	-1.092											-1.092
														-0.35									-0.35
														-2.551									-2.551
	-1.973	-1.973											-1.973	-0.545									-0.545
														-2.249									-2.249
	-3.037	-3.037											-3.037	-1.39									-1.39
														-2.19									-2.19
	-0.263	-0.263											-0.263
	-2.301	-2.301											-2.301
														-2.081									-2.081
	-0.286	-0.286											-0.286	-1.513									-1.513
														-1.464									-1.464
														-1.756									-1.756
														-1.029									-1.029
														-0.834									-0.834
														-1.872									-1.872
														-0.365									-0.365
	-1.996	-1.996											-1.996
	-1.439	-1.439											-1.439	-1.217									-1.217
														-1.363									-1.363
	-3.234	-3.234											-3.234
	-0.846	-0.846											-0.846	-1.588									-1.588
	-2.853	-2.853											-2.853	-2.035									-2.035
	-0.143	-0.143											-0.143	-0.287									-0.287
	-1.053	-1.053											-1.053	-0.422									-0.422
	-0.838	-0.838											-0.838
	-0.11	-0.11											-0.11
														-0.736									-0.736
	-2.423	-2.423											-2.423
	-3.154	-3.154											-3.154
	-0.508	-0.508											-0.508
	-2.43	-2.43											-2.43
														-0.864									-0.864
	-1.613	-1.613											-1.613	-1.658									-1.658
														-1.319									-1.319
	-0.86	-0.86											-0.86	-1.421									-1.421
														-1.664									-1.664
														-3.319									-3.319
	-3.193	-3.193											-3.193
	-1.04	-1.04											-1.04
														-3.375									-3.375
	-3.322	-3.322											-3.322	-2.635									-2.635
	-3.198	-3.198											-3.198
	-1.675	-1.675											-1.675	-1.049									-1.049
														-1.639									-1.639
	-5.394	-5.394											-5.394
	-3.211	-3.211											-3.211
	-2.285	-2.285											-2.285
	-3.998	-3.998											-3.998	-0.179									-0.179
														-0.387									-0.387
														-2.679									-2.679
														-1.339									-1.339
														-1.078									-1.078
														-0.335									-0.335
	-4.508	-4.508											-4.508	-2.67									-2.67
	-2.193	-2.193											-2.193
	-1.813	-1.813											-1.813
														-2.897									-2.897
														-2.053									-2.053
														-2.111									-2.111
	-0.314	-0.314											-0.314
														-2.698									-2.698
														-2.143									-2.143
														-1.247									-1.247
	-2.993	-2.993											-2.993
	-1.436	-1.436											-1.436
	-1.851	-1.851											-1.851
	-2.072	-2.072											-2.072
														-1.744									-1.744
														-1.599									-1.599
	-2.933	-2.933											-2.933
														-2.498									-2.498
														-2.11									-2.11
														-0.446									-0.446
														-0.963									-0.963
	-0.783	-0.783											-0.783	-3.393									-3.393
														-2.926									-2.926
	-0.121	-0.121											-0.121
	-0.801	-0.801											-0.801
	-1.125	-1.125											-1.125
	-6.205	-6.205											-6.205	-1.982									-1.982
														-1.541									-1.541
	-4.316	-4.316											-4.316	-1.33									-1.33
														-1.826									-1.826
														-0.346									-0.346
														-2.443									-2.443
														-0.895									-0.895
														-0.417									-0.417
														-2.757									-2.757
	-0.697	-0.697											-0.697
	-1.204	-1.204											-1.204
	-0.535	-0.535											-0.535
														-0.594									-0.594
	-1.263	-1.263											-1.263	-0.299									-0.299
	-2.212	-2.212											-2.212	-5.118									-5.118
	-4.059	-4.059											-4.059
	-1.491	-1.491											-1.491	-0.356									-0.356
	-4.62	-4.62											-4.62	-0.228									-0.228
	-2.69	-2.69											-2.69
	-3.211	-3.211											-3.211	-4.092									-4.092
	-3.425	-3.425											-3.425	-0.446									-0.446
														-0.706									-0.706
	-0.618	-0.618											-0.618
														-1.009									-1.009
	-0.944	-0.944											-0.944
	-0.166	-0.166											-0.166
	-0.82	-0.82											-0.82	-2.473									-2.473
	-2.143	-2.143											-2.143	-1.699									-1.699
	-0.845	-0.845											-0.845	-2.162									-2.162
														-0.953									-0.953
														-2.135									-2.135
														-1.122									-1.122
														-0.643									-0.643
														-1.585									-1.585
	-0.93	-0.93											-0.93
														-1.046									-1.046
														-2.15									-2.15
	-0.843	-0.843											-0.843	-0.882									-0.882
	-0.606	-0.606											-0.606
	-0.719	-0.719											-0.719
	-0.668	-0.668											-0.668
														-0.781									-0.781
	-1.95	-1.95											-1.95
	-1.553	-1.553											-1.553	-1.612									-1.612
	-1.785	-1.785											-1.785	-0.135									-0.135
	-1.182	-1.182											-1.182
	-2.098	-2.098											-2.098
	-0.495	-0.495											-0.495
	-1.636	-1.636											-1.636
	-1.636	-1.636											-1.636	-2.75									-2.75
														-2.863									-2.863
														-5.652									-5.652
	-2.003	-2.003											-2.003	-1.737									-1.737
	-3.338	-3.338											-3.338
	-1.814	-1.814											-1.814	-1.311									-1.311
														-0.647									-0.647
	-2.057	-2.057											-2.057
	-1.089	-1.089											-1.089
	-2.999	-2.999											-2.999
	-0.971	-0.971											-0.971
	-0.385	-0.385											-0.385	-1.444									-1.444
														-2.24									-2.24
														-0.239									-0.239
														-1.479									-1.479
	-2.123	-2.123											-2.123	-1.32									-1.32
	-1.591	-1.591											-1.591	-1.399									-1.399
	-1.206	-1.206											-1.206	-0.478									-0.478
	-1.075	-1.075											-1.075
	-2.332	-2.332											-2.332
	-2.518	-2.518											-2.518
	-3.37	-3.37											-3.37
	-0.993	-0.993											-0.993
	-0.474	-0.474											-0.474
	-2.785	-2.785											-2.785
	-0.223	-0.223											-0.223
														-3.375									-3.375
	-1.751	-1.751											-1.751	-0.979									-0.979
	-0.534	-0.534											-0.534	-1.517									-1.517
														-1.91									-1.91
														-1.885									-1.885
														-0.67									-0.67
														-1.851									-1.851
														-0.916									-0.916
														-0.33									-0.33
														-2.055									-2.055
	-3.336	-3.336											-3.336
	-2.224	-2.224											-2.224	-1.586									-1.586
	-2.052	-2.052											-2.052	-0.756									-0.756
	-1.831	-1.831											-1.831
														-2.349									-2.349
														-0.236									-0.236
	-2.214	-2.214											-2.214	-2.874									-2.874
														-0.191									-0.191
	-1.216	-1.216											-1.216	-0.446									-0.446
														-1.806									-1.806
														-2.282									-2.282
														-1.957									-1.957
														-1.212									-1.212
														-0.774									-0.774
														-0.665									-0.665
														-0.727									-0.727
														-2.053									-2.053
														-1.451									-1.451
	-1.023	-1.023											-1.023	-2.608									-2.608
	-3.416	-3.416											-3.416	-2.678									-2.678
	-4.094	-4.094											-4.094	-0.778									-0.778
	-2.614	-2.614											-2.614
	-4.257	-4.257											-4.257	-0.298									-0.298
	-1.554	-1.554											-1.554	-1.92									-1.92
	-2.722	-2.722											-2.722
	-3.148	-3.148											-3.148	-3.519									-3.519
	-0.223	-0.223											-0.223
	-0.635	-0.635											-0.635
	-2.439	-2.439											-2.439	-1.369									-1.369
	-3.501	-3.501											-3.501	-3.076									-3.076
	-3.465	-3.465											-3.465
	-0.995	-0.995											-0.995	-1.339									-1.339
	-1.807	-1.807											-1.807	-0.195									-0.195
	-1.639	-1.639											-1.639
														-2.024									-2.024
	-0.298	-0.298											-0.298	-3.072									-3.072
	-2.876	-2.876											-2.876	-2.224									-2.224
	-4.802	-4.802											-4.802
	-4.366	-4.366											-4.366
														-1.64									-1.64
														-1.872									-1.872
	-2.134	-2.134											-2.134	-3.732									-3.732
	-1.364	-1.364											-1.364	-3.916									-3.916
	-5.534	-5.534											-5.534
														-1.497									-1.497
														-2.16									-2.16
	-0.88	-0.88											-0.88	-2.366									-2.366
	-0.153	-0.153											-0.153
														-2.766									-2.766
	-0.502	-0.502											-0.502
														-0.478									-0.478
	-3.214	-3.214											-3.214	-2.435									-2.435
	-1.128	-1.128											-1.128	-0.591									-0.591
	-2.498	-2.498											-2.498	-3.329									-3.329
														-4.342									-4.342
														-3.76									-3.76
	-0.818	-0.818											-0.818	-3.373									-3.373
	-0.972	-0.972											-0.972	-2.051									-2.051
	-2.556	-2.556											-2.556	-2.161									-2.161
														-4.682									-4.682
														-2.675									-2.675
	-1.754	-1.754											-1.754	-1.829									-1.829
														-3.705									-3.705
	-1.515	-1.515											-1.515
														-4.013									-4.013
	-1.249	-1.249											-1.249
	-0.128	-0.128											-0.128
														-1.027									-1.027
														-0.986									-0.986
	-0.708	-0.708											-0.708	-3.905									-3.905
	-2.262	-2.262											-2.262
	-1.542	-1.542											-1.542
	-1.287	-1.287											-1.287
	-1.345	-1.345											-1.345
	-1.708	-1.708											-1.708	-1.903									-1.903
														-2.176									-2.176
														-0.303									-0.303
	-0.923	-0.923											-0.923	-1.4									-1.4
	-2.559	-2.559											-2.559
														-1.67									-1.67
	-2.095	-2.095											-2.095	-0.62									-0.62
	-0.15	-0.15											-0.15
	-0.183	-0.183											-0.183	-2.153									-2.153
	-2.158	-2.158											-2.158
	-0.964	-0.964											-0.964	-1.034									-1.034
	-2.756	-2.756											-2.756	-0.458									-0.458
	-2.439	-2.439											-2.439	-1.436									-1.436
	-2.337	-2.337											-2.337
	-0.813	-0.813											-0.813
	-0.568	-0.568											-0.568
	-0.164	-0.164											-0.164	-3.891									-3.891
														-0.937									-0.937
	-1.484	-1.484											-1.484	-1.762									-1.762
														-0.727									-0.727
														-0.407									-0.407
														-1.907									-1.907
	-2.252	-2.252											-2.252	-1.426									-1.426
	-1.711	-1.711											-1.711	-0.927									-0.927
	-1.259	-1.259											-1.259
	-0.713	-0.713											-0.713
	-3.594	-3.594											-3.594
	-1.961	-1.961											-1.961
	-0.258	-0.258											-0.258	-2.666									-2.666
	-1.255	-1.255											-1.255
														-2.216									-2.216
	-0.981	-0.981											-0.981	-2.433									-2.433
														-2.251									-2.251
														-0.785									-0.785
	-3.97	-3.97											-3.97
														-0.62									-0.62
	-3.834	-3.834											-3.834
	-0.92	-0.92											-0.92
	-0.467	-0.467											-0.467
	-1.635	-1.635											-1.635
	-4.299	-4.299											-4.299
	-0.405	-0.405											-0.405
	-2.397	-2.397											-2.397
	-3.128	-3.128											-3.128	-2.603									-2.603
														-3.15									-3.15
	-2.742	-2.742											-2.742
														-1.541									-1.541
	-1.808	-1.808											-1.808
	-2.804	-2.804											-2.804	-2.26									-2.26
														-1.662									-1.662
														-1.701									-1.701
	-1.975	-1.975											-1.975
	-4.246	-4.246											-4.246
	-1.058	-1.058											-1.058
	-3.585	-3.585											-3.585	-1.655									-1.655
	-3.513	-3.513											-3.513
	-3.152	-3.152											-3.152
	-1.144	-1.144											-1.144
	-3.511	-3.511											-3.511
	-0.367	-0.367											-0.367
	-0.446	-0.446											-0.446
														-1.699									-1.699
	-5.653	-5.653											-5.653	-0.198									-0.198
														-0.799									-0.799
														-1.278									-1.278
	-4.588	-4.588											-4.588	-0.835									-0.835
	-2.676	-2.676											-2.676
														-2.185									-2.185
														-1.828									-1.828
	-5.112	-5.112											-5.112	-0.742									-0.742
	-1.846	-1.846											-1.846	-2.673									-2.673
														-2.467									-2.467
														-0.291									-0.291
	-3.082	-3.082											-3.082
														-1.746									-1.746
	-1.526	-1.526											-1.526	-3.492									-3.492
														-2.825									-2.825
	-1.115	-1.115											-1.115	-1.994									-1.994
	-0.715	-0.715											-0.715	-3.415									-3.415
														-0.862									-0.862
														-2.455									-2.455
														-4.716									-4.716
	-4.588	-4.588											-4.588
	-4.442	-4.442											-4.442
														-0.186									-0.186
	-1.119	-1.119											-1.119	-0.179									-0.179
	-0.516	-0.516											-0.516	-1.673									-1.673
														-0.912									-0.912
	-2.032	-2.032											-2.032	-1.673									-1.673
	-3.429	-3.429											-3.429
	-5.282	-5.282											-5.282	-4.31									-4.31
	-3.859	-3.859											-3.859	-3.195									-3.195
	-1.84	-1.84											-1.84
														-1.004									-1.004
														-1.175									-1.175
														-1.937									-1.937
														-1.827									-1.827
														-0.669									-0.669
														-2.177									-2.177
														-3.472									-3.472
														-3.115									-3.115
														-4.198									-4.198
														-4.017									-4.017
														-2.484									-2.484
														-1.473									-1.473
														-3.515									-3.515
														-0.103									-0.103
														-1.163									-1.163
														-0.669									-0.669
														-3.06									-3.06
														-4.849									-4.849
														-2.932									-2.932
														-1.085									-1.085
														-0.103									-0.103
														-4.448									-4.448
														-0.824									-0.824
														-2.326									-2.326
														-0.167									-0.167
														-0.856									-0.856
														-3.13									-3.13
														-3.07									-3.07
														-1.653									-1.653
														-1.994									-1.994
														-2.223									-2.223
														-2.602									-2.602
														-6.307									-6.307
														-1.281									-1.281
														-2.631									-2.631
														-3.771									-3.771
														-1.434									-1.434
														-0.382									-0.382
														-3.345									-3.345
														-3.59									-3.59
														-0.916									-0.916
														-0.371									-0.371
														-3.393									-3.393
														-2.049									-2.049
														-1.338									-1.338
														-0.122									-0.122
														-2.192									-2.192
														-1.021									-1.021
														-2.861									-2.861
														-2.568									-2.568
														-0.331									-0.331
														-1.451									-1.451
														-2.573									-2.573
														-1.011									-1.011
														-1.926									-1.926
														-3.843									-3.843
														-3.114									-3.114
														-0.109									-0.109
														-3.86									-3.86
														-2.16									-2.16
														-1.241									-1.241
														-0.191									-0.191
														-0.893									-0.893
														-0.701									-0.701
														-0.476									-0.476
														-2.755									-2.755
														-0.67									-0.67
														-2.48									-2.48
														-0.714									-0.714
														-3.683									-3.683
														-1.878									-1.878
														-0.967									-0.967
														-2.531									-2.531
														-2.608									-2.608
														-1.41									-1.41
														-2.317									-2.317
														-0.892									-0.892
														-1.116									-1.116
														-1.221									-1.221
														-0.856									-0.856
														-1.864									-1.864
														-1.65									-1.65
														-2.677									-2.677
														-2.029									-2.029
														-1.549									-1.549
														-5.354									-5.354
														-1.188									-1.188
														-4.406									-4.406
														-1.752									-1.752
														-2.966									-2.966
														-2.897									-2.897
														-4.36									-4.36
														-1.968									-1.968
														-2.294									-2.294
														-2.451									-2.451
														-2.875									-2.875
														-2.998									-2.998
														-3.553									-3.553
														-0.802									-0.802
														-3.12									-3.12
														-3.961									-3.961
														-3.646									-3.646
														-1.645									-1.645
														-1.106									-1.106
														-0.804									-0.804
														-1.205									-1.205
														-1.63									-1.63
														-1.987									-1.987
														-3.872									-3.872
														-2.967									-2.967
														-1.551									-1.551
														-2.335									-2.335
														-2.452									-2.452
														-1.927									-1.927
														-0.979									-0.979
														-0.788									-0.788
														-0.893									-0.893
														-0.257									-0.257
														-1.296									-1.296
														-1.961									-1.961
														-1.338									-1.338
														-0.94									-0.94
														-2.713									-2.713
														-1.712									-1.712
														-0.608									-0.608
														-4.516									-4.516
														-0.446									-0.446
														-3.17									-3.17
														-1.338									-1.338
														-3.196									-3.196
														-0.601									-0.601
														-1.037									-1.037
														-1.758									-1.758
														-2.527									-2.527
														-3.386									-3.386
														-4.323									-4.323
														-3.407									-3.407
														-2.195									-2.195
														-1.751									-1.751
														-1.553									-1.553
														-1.744									-1.744
														-0.828									-0.828
														-1.42									-1.42
														-0.149									-0.149
														-0.545									-0.545
														-2.256									-2.256
														-2.451									-2.451
														-0.817									-0.817
														-1.682									-1.682
														-1.504									-1.504
														-2.595									-2.595
														-1.528									-1.528
														-1.599									-1.599
														-4.37									-4.37
														-1.768									-1.768
														-1.655									-1.655
														-1.173									-1.173
														-1.083									-1.083
														-2.512									-2.512
														-3.147									-3.147
														-2.807									-2.807
														-0.613									-0.613
														-2.822									-2.822
														-2.481									-2.481
														-4.61									-4.61
														-2.844									-2.844
														-2.877									-2.877
														-2.992									-2.992
														-2.204									-2.204
														-1.902									-1.902
														-1.087									-1.087
														-0.892									-0.892
														-4.015									-4.015
														-1.525									-1.525
														-1.625									-1.625
														-0.429									-0.429
														-0.646									-0.646
														-0.352									-0.352
														-0.556									-0.556
														-0.459									-0.459
														-1.673									-1.673
														-1.294									-1.294
														-0.613									-0.613
														-3.028									-3.028
														-2.151									-2.151
														-0.397									-0.397
														-0.925									-0.925
														-0.826									-0.826
														-2.43									-2.43
														-2.148									-2.148
														-0.243									-0.243
														-1.586									-1.586
														-2.554									-2.554
														-2.164									-2.164
														-3.357									-3.357
														-3.014									-3.014
														-0.492									-0.492
														-0.223									-0.223
														-2.254									-2.254
														-2.765									-2.765
														-0.787									-0.787
														-0.282									-0.282
														-1.32									-1.32
														-0.839									-0.839
														-0.446									-0.446
														-0.187									-0.187
														-1.634									-1.634
														-1.023									-1.023
														-0.65									-0.65
														-3.044									-3.044
														-1.242									-1.242
														-1.843									-1.843
														-4.269									-4.269
														-2.916									-2.916
														-1.338									-1.338
														-3.662									-3.662
														-2.798									-2.798
														-2.07									-2.07
														-5.575									-5.575
														-1.338									-1.338
														-3.467									-3.467
														-4.655									-4.655
														-2.23									-2.23
														-4.205									-4.205
[truncated: 96 more rows]
