# Supplementary material for: Huntingtin recruits KIF1A to transport synaptic vesicle precursors along the mouse axon to support synaptic transmission and motor skill learning
Source: eLife. 2023 Jul 11;12:e81011. doi: 10.7554/eLife.81011 (PMC10365837; doi:10.7554/eLife.81011)
Supplement: Figure 2—source data 3. [file elife-81011-fig2-data3.xlsx]

## Sheet: Figure 2d-Rotarod Day8
	Wild-type																				HTT-SD
trial1	85	64	48	125	77	91	117	89	91	127	89	78	85	49	35	40	75	98	51	35	84	90	50	50	44	59	92	71	105	19	100	30	39	44	125	75	39	65	31	75
trial2	125	29	71	110	63	70	73	103	85	102	54	72	102	47	25	57	104	104	95	47	62	75	88	130	63	64	104	84	101	37	91	25	55	75	45	57	63	90	81	59
trial3	125	115	145	144	83	149	70	99	83	89	65	78	98	38	67	76	124	87	171	58	86	76	57	151	76	73	65	97	50	54	71	17	55	79	72	75	33	71	67	45
trial4	155	140	146	153	78	103	34	66	86	64	34	49	81	61	42	63	108	104	55	63	55	87	75	122	121	86	106	96	73	31	69	37	65	75	76	84	19	125	68	70
trial5	120	106	116	203	57	158	50	54	69	131	64	101	90	36	36	94	77	114	100	47	49	127	83	103	76	22	156	84	99	53	94	19	36	84	118	63	45	117	46	40
trial6	77	91	100	91	107	122	84	57	64	116	48	109	45	75	30	145	92	75	131	63	45	53	96	103	61	50	50	83	70	50	128	38	17	80	66	51	37	77	61	39
trial7	170	123	126	205	74	64	19	74	81	99	32	123	35	23	34	89	99	77	142	59	67	123	65	97	44	98	71	100	40	31	36	14	40	81	74	97	46	121	72	34
trial8	141	90	142	115	62	108	35	42	46	104	71	72	42	63	67	92	64	92	82	44	145	103	65	77	108	80	119	85	85	23	90	20	68	64	86	20	88	84	30	43
trial9	181	108	91	201	90	81	99	51	99	102	52	72	31	47	35	130	73	66	50	58	64	106	50	48	136	95	53	62	70	39	51	39	66	74	130	46	76	70	58	66
trial10	139	60	130	116	73	102	113	69	67	58	84	114	73	43	42	122	88	86	85	48	59	38	66	87	84	89	72	32	31	44	90	41	79	87	71	48	70	37	42	48
	Wild-type													HTT-SA
trial1	85	64	48	125	77	109	87	70	64	35	72	92	37	49	76	84	54	99	60	70	156	38	37	87	42	143	77	88	66	75	43
trial2	125	29	71	110	63	75	92	58	21	41	65	97	67	71	113	110	100	53	73	80	89	34	51	69	86	171	61	60	48	75	39
trial3	125	115	145	144	83	49	63	74	66	38	92	48	103	65	124	177	114	59	68	84	117	72	33	77	123	136	44	63	80	58	35
trial4	155	140	146	153	78	56	93	65	75	51	100	76	53	69	146	99	122	91	87	59	138	55	76	40	111	130	66	62	92	38	73
trial5	120	106	116	203	57	102	115	76	64	47	85	51	81	67	140	134	116	74	123	82	119	38	88	33	103	113	63	50	78	78	69
trial6	77	91	100	91	107	99	103	75	79	34	74	86	92	65	142	95	116	74	74	46	99	43	59	23	113	126	58	78	50	89	37
trial7	170	123	126	205	74	99	97	95	35	55	63	58	82	80	106	129	128	44	72	71	106	36	48	26	91	77	36	53	65	69	62
trial8	141	90	142	115	62	43	49	76	56	76	49	23	84	69	118	177	100	35	57	47	142	34	39	36	137	89	44	77	49	77	48
trial9	181	108	91	201	90	75	73	62	52	18	40	71	86	57	86	100	105	50	71	59	122	49	43	22	138	99	78	57	85	57	50
trial10	139	60	130	116	73	87	53	38	48	38	70	58	103	33	134	82	110	83	80	49	105	41	42	64	147	64	99	58	68	78	67
	-2.391	-1.624			-2.391	-0.903
		-1.607				-1.527
	-1.185	-0.267			-1.185	-3.53
		-0.793				-2.846
	-0.522				-0.522
						-2.821
		-3.581				-2.732
	-1.21	-1.547			-1.21	-2.756
	-1.071				-1.071	-3.079
						-1.233
		-1.788				-3.106
	-0.985	-1.017			-0.985	-3.741
		-0.565				-1.651
	-0.893				-0.893	-1.965
	-0.228	-0.195			-0.228	-2.522
	-0.393				-0.393	-0.418
	-0.319	-0.914			-0.319	-0.924
						-1.469
						-0.167
						-2.252
						-2.721
	-3.247				-3.247	-2.419
	-0.794				-0.794	-2.602
	-0.427	-0.167			-0.427	-1.244
	-5.05	-4.547			-5.05	-2.597
						-0.63
	-2.187				-2.187
	-0.139				-0.139	-2.92
	-0.863				-0.863	-2.855
	-3.342				-3.342
	-1.583				-1.583	-0.543
	-2.679				-2.679
	-4.342	-1.702			-4.342	-1.768
		-1.79
		-1.067
		-0.937
	-3.304				-3.304	-1.539
	-3.301	-1.769			-3.301	-0.779
	-1.662				-1.662	-1.501
						-2.14
		-1.183				-1.23
		-2.364
	-2.314				-2.314
		-1.774
	-1.715	-1.731			-1.715	-2.74
	-1.692				-1.692	-2.728
	-1.652				-1.652	-2.429
						-1.8
						-2.626
	-4.114	-0.805			-4.114	-0.897
		-2.602				-2.74
	-3.367				-3.367	-2.433
		-2.219				-2.026
		-0.773				-1.736
	-0.425	-0.786			-0.425	-1.102
		-0.983				-3.44
						-1.556
		-1.351
						-0.634
						-0.749
		-2.537				-0.151
		-2.804				-0.432
		-2.592				-1.923
	-0.206	-0.618			-0.206	-0.92
		-3.088				-2.765
		-2.438				-3.198
	-0.736	-3.483			-0.736
	-0.566				-0.566	-1.937
	-0.382				-0.382	-5.294
		-5.252
	-3.765				-3.765
	-3.135				-3.135
	-1.946				-1.946
	-2.519				-2.519
	-0.495				-0.495
	-0.472	-0.477			-0.472	-4.397
		-0.581				-3.406
		-0.278
	-0.141	-0.585			-0.141	-3.975
	-2.362				-2.362	-2.43
	-1.84	-2.45			-1.84
	-1.013				-1.013	-3.168
	-1.918				-1.918
	-0.254				-0.254	-0.425
	-0.861	-1.48			-0.861	-1.426
	-0.76	-0.607			-0.76	-0.555
	-0.8				-0.8	-0.591
		-2.169
		-0.277
						-2.311
	-0.549				-0.549
	-1.234				-1.234	-1.538
	-0.536				-0.536	-1.872
	-0.549				-0.549
						-0.297
	-1.859	-1.913			-1.859
	-3.157	-1.267			-3.157	-1.162
		-1.816
	-0.251	-2.87			-0.251
	-2.411	-1.089			-2.411	-2.371
	-0.119	-1.421			-0.119	-1.844
		-3.355				-0.738
		-4.593				-0.949
	-2.362	-2.191			-2.362	-0.841
	-1.953				-1.953
	-1.639				-1.639	-1.336
		-0.565				-0.982
	-1.394	-2.486			-1.394	-0.888
	-4.52	-3.08			-4.52	-2.19
		-0.321				-0.138
	-0.548				-0.548	-0.267
	-3.044				-3.044	-0.869
		-6.43				-0.208
						-0.913
						-1.949
						-0.121
	-1.444	-3.062			-1.444
	-1.005	-3.656			-1.005
	-2.222	-1.227			-2.222
	-1.092				-1.092	-2.216
	-1.756				-1.756
	-1.192				-1.192
	-1.444	-0.595			-1.444	-2.32
		-0.899
	-2.649				-2.649
		-1.837				-2.066
	-0.441	-2.403			-0.441	-1.914
	-2.322	-1.03			-2.322	-2.376
		-1.96				-0.555
	-2.064				-2.064	-0.47
		-3.965				-0.93
	-1.681	-0.626			-1.681	-2.634
	-0.511	-0.544			-0.511
	-1.116				-1.116	-1.893
	-1.858				-1.858	-2.473
		-0.9				-2.352
		-0.141				-1.913
	-1.339	-2.635			-1.339	-1.102
						-0.27
	-2.41	-3.634			-2.41
	-0.736				-0.736	-3.648
		-0.351
		-0.714
	-1.841	-0.705			-1.841
	-1.626				-1.626
	-4.531	-0.878			-4.531
		-0.151
	-2.163				-2.163
	-4.566				-4.566
	-4.291	-0.329			-4.291
		-2.24
		-1.726
	-1.693	-1.617			-1.693	-1.569
						-1.131
	-0.919	-1.715			-0.919	-1.059
	-1.631				-1.631	-1.1
	-1.726	-0.17			-1.726	-1.438
						-5.212
	-2.418	-0.897			-2.418	-2.985
		-1.541				-2.538
						-2.456
		-1.412				-3.18
						-3.024
	-2.128	-3.228			-2.128	-4.393
						-1.122
		-1.271				-4.416
		-1.83				-2.608
	-1.658	-3.395			-1.658	-1.271
						-2.331
		-0.466				-2.338
	-1.207	-0.855			-1.207
	-1.119	-1.69			-1.119
	-2.264				-2.264	-1.205
						-5.228
	-1.039				-1.039	-0.364
	-0.404	-0.496			-0.404	-1.241
		-0.829				-2.371
		-1.017
	-1.269	-1.62			-1.269
		-1.198				-0.144
	-0.273	-1.405			-0.273
	-1.11				-1.11
	-1.481	-0.521			-1.481
		-1.422
	-0.873				-0.873	-0.98
		-0.719
						-2.467
						-1.704
						-1.275
	-0.141	-1.135			-0.141
		-2.156				-3.116
	-0.923				-0.923	-4.295
		-2.438
	-1.149	-2.965			-1.149
		-1.229
		-0.149				-5.009
	-2.818				-2.818	-3.275
	-1.59				-1.59	-1.032
		-1.262				-0.988
	-0.904	-2.591			-0.904	-2.075
	-5.271				-5.271	-0.801
						-1.482
	-1.858	-3.157			-1.858
						-2.205
	-0.323				-0.323	-0.298
						-0.563
		-2.087
						-1.906
						-1.167
	-1.42	-0.977			-1.42
	-1.479	-1.688			-1.479
	-1.721				-1.721
		-2.674				-2.028
	-1.618	-1.693			-1.618	-1.307
		-0.555
						-3.016
						-1.698
	-0.77	-1.037			-0.77	-4.523
	-1.085	-1.381			-1.085	-4.1
	-0.551	-0.933			-0.551
	-1.74	-1.925			-1.74	-0.55
		-1.379
		-1.602				-0.555
						-0.912
	-2.706	-1.072			-2.706	-2.312
	-2.941	-1.843			-2.941	-1.748
	-2.362				-2.362	-2.316
	-1.846	-1.793			-1.846
						-0.98
	-0.683	-0.858			-0.683	-0.857
	-0.835				-0.835
		-0.24
	-3.131	-1.006			-3.131	-0.476
		-0.958
		-0.576				-1.22
		-1.218
	-3.147				-3.147	-0.767
						-0.26
						-0.492
		-4.227				-1.566
	-1.138	-0.824			-1.138
	-1	-1.011			-1	-0.384
	-1.028	-2.117			-1.028
	-3.2	-0.251			-3.2
	-1.77	-0.181			-1.77
						-1.806
	-3.011	-1.05			-3.011
	-0.267				-0.267	-1.376
	-1.253	-0.638			-1.253
	-1.383				-1.383	-1.435
	-1.672	-1.671			-1.672	-0.594
	-2.87	-4.353			-2.87
	-3.167	-0.804			-3.167
	-0.94				-0.94
	-0.739	-0.134			-0.739	-0.807
		-0.659				-2.114
						-0.594
		-3.432				-3.402
	-1.565	-1.785			-1.565	-0.738
		-2.286
						-3.029
						-0.465
						-3.176
	-1.922	-0.178			-1.922	-1.922
	-0.456	-0.892			-0.456	-3.022
	-0.435				-0.435	-2.382
						-0.115
		-1.549				-2.074
		-1.435				-1.733
						-0.456
	-3.136	-2.758			-3.136	-4.239
						-4.252
	-2.109	-0.228			-2.109	-0.468
	-2.523				-2.523
	-2.959	-3.833			-2.959
	-2.676	-0.946			-2.676	-0.708
	-0.578	-3.734			-0.578	-1.381
	-1.791	-3.538			-1.791	-4.34
	-1.048	-3.111			-1.048	-2.617
	-4.36	-3.855			-4.36
	-2.738	-3.15			-2.738
	-0.638				-0.638
	-3.367	-0.585			-3.367
	-3.424				-3.424	-3.813
	-4.205	-1.405			-4.205	-2.242
	-3.467	-0.945			-3.467	-2.967
	-3.424	-1.867			-3.424	-1.115
	-0.105	-0.904			-0.105
	-0.191				-0.191
		-0.626				-3.395
		-0.578				-2.398
	-2.317				-2.317
		-1.548
						-1.565
	-0.69	-2.477			-0.69	-0.641
	-0.251	-2.38			-0.251
		-3.241				-3.914
	-3.209	-0.699			-3.209	-0.547
	-3.054	-0.988			-3.054	-1.431
						-1.724
						-0.862
						-1.203
	-0.909	-2.735			-0.909
	-2.117				-2.117
	-3.647				-3.647	-2.114
	-3.343	-1.481			-3.343	-2.808
	-1.254	-1.088			-1.254	-1.014
		-0.552
	-2.228				-2.228
						-1.383
	-1.646	-1.907			-1.646	-0.963
	-2.231	-0.558			-2.231	-0.971
	-1.128	-0.551			-1.128
	-1.564				-1.564
	-0.534	-0.171			-0.534
						-1.015
						-0.81
		-0.468
	-2.085				-2.085	-1.816
	-0.623	-3.461			-0.623
	-0.811	-4.225			-0.811	-1.891
	-1.681	-1.909			-1.681
		-2.992				-0.903
						-1.604
						-1.966
	-3.097				-3.097	-2.276
	-0.953	-0.663			-0.953	-2.406
		-1.486				-2.33
	-0.613	-2.635			-0.613	-2.373
						-2.172
	-1.858	-0.851			-1.858
	-1.837				-1.837	-0.808
						-4.165
		-0.952				-0.758
	-0.243	-1.131			-0.243
						-2.674
	-5.166	-3.405			-5.166
		-3.411				-0.191
		-0.324				-4.68
	-2.169				-2.169	-5.611
						-0.825
	-0.232	-1.955			-0.232
						-1.721
	-0.422	-0.535			-0.422
						-0.705
	-0.939	-2.109			-0.939	-0.902
	-1.643				-1.643
	-0.667	-2.54			-0.667
		-1.21				-2.113
	-4.115				-4.115
	-3.852	-0.264			-3.852	-1.797
	-4.048	-2.509			-4.048	-0.668
	-0.17	-0.801			-0.17	-0.279
	-0.893	-1.008			-0.893
	-1.361				-1.361
	-2.215				-2.215	-0.35
	-2.019	-1.187			-2.019	-0.649
	-3.643	-1.145			-3.643
		-1.897				-6.68
	-1.303				-1.303
	-1.059	-1.192			-1.059
		-2.294				-1.675
	-2.75				-2.75	-0.231
	-0.623				-0.623	-2.534
	-1.202	-1.051			-1.202
						-1.337
						-3.182
						-1.854
						-0.744
		-4.418
		-1.915				-0.694
		-2.624				-0.686
		-4.187
						-2.191
		-1.568
	-2.345				-2.345
	-4.374	-0.967			-4.374
	-1.742				-1.742	-2.07
	-0.708	-1.702			-0.708	-0.424
		-0.369				-2.006
	-3.68				-3.68
	-4.461	-0.731			-4.461
	-0.292	-2.229			-0.292
	-2.719				-2.719
	-2.379	-1.577			-2.379
		-0.984
		-0.107
	-4.145	-1.1			-4.145
	-3.948	-0.381			-3.948	-1.528
	-3.784	-2.799			-3.784	-0.801
	-1.91	-0.207			-1.91	-1.917
		-2.679				-2.305
						-2.849
						-0.716
	-2.991				-2.991	-2.557
	-2.327				-2.327	-1.09
	-3.441				-3.441	-0.253
	-3.423				-3.423	-3.677
						-0.167
	-1.046				-1.046	-4.16
	-0.694				-0.694
						-2.791
						-2.004
	-2.93				-2.93	-3.11
	-3.792				-3.792	-0.191
						-3.22
	-0.481				-0.481
	-0.223				-0.223	-3.877
						-0.125
	-0.705				-0.705	-4.621
	-1.894				-1.894	-3.276
	-4.671				-4.671	-1.236
						-0.716
						-1.023
	-2.476				-2.476
	-1.569	-1.475			-1.569	-2.429
	-2.11	-2.043			-2.11
	-0.491	-3.638			-0.491	-3.229
		-1.442				-4.111
		-2.122
						-1.933
	-2.914				-2.914
		-4.087
		-3.596
		-3.172
						-1.036
	-3.229	-1.689			-3.229	-2.538
		-4.661
	-0.268	-1.283			-0.268
	-2.565				-2.565	-0.731
						-1.552
	-2.309				-2.309
	-1.778				-1.778	-0.47
	-0.751				-0.751	-0.361
	-1.354	-3.161			-1.354
	-1.454	-0.354			-1.454
	-1.742				-1.742
	-2.005				-2.005
	-1.502				-1.502
	-0.535				-0.535
	-1.188				-1.188
	-0.431	-2.415			-0.431
		-1.048
						-1.161
						-2.516
						-0.268
		-0.91
		-2.732				-1.873
		-1.096
		-3.858
						-0.478
						-1.447
		-0.527				-1.7
		-1.506				-1.209
						-3.345
		-2.23
		-4.879
		-1.707				-4.823
						-3.754
						-2.6
		-1.188
		-0.323
						-3.172
						-2.74
						-3.86
		-4.241				-4.549
						-0.521
		-2.572				-4.797
						-3.981
						-4.492
		-0.921				-4.477
						-1.336
						-0.465
						-4.055
		-2.993
		-0.167
		-1.396
		-2.351
						-2.898
		-2.667				-0.845
						-2.408
		-1.971				-0.801
		-1.362				-2.357
		-0.428
		-1.251
		-1.204				-1.706
						-0.445
		-0.208				-0.346
						-1.721
		-1.611				-0.609
		-1.804
		-3.518				-4.201
		-0.324				-1.256
		-0.876				-3.337
		-2.04
		-2.604
		-0.276
		-1.845				-0.445
		-1.076
						-1.618
		-1.52
						-0.928
						-0.853
		-1.375				-3.841
		-0.503				-0.778
		-2.862
		-2.979				-2.973
		-1.516				-1.114
		-0.975
		-2.83
						-1.249
						-2.372
		-3.35
		-4.12				-2.779
		-3.936				-3.205
		-2.794
		-0.872				-2.713
		-0.736				-0.931
		-1.338				-1.451
		-2.628				-1.879
						-1.767
		-1.283				-2.266
						-0.937
		-0.942				-0.937
		-2.951				-0.463
		-1.658				-1.689
		-0.771				-0.167
		-2.223				-1.757
		-1.401
		-1.008				-3.515
						-1.977
		-3.884				-2.351
		-1.327
		-2.326				-2.295
		-1.866				-1.183
		-2.679				-1.757
		-1.913
		-1.674
		-1.814				-1.628
						-0.382
		-1.159				-0.36
						-1.488
						-0.779
						-0.937
						-1.147
						-2.886
						-3.497
						-1.205
		-1.069				-2.113
		-1.661				-3.153
		-1.308				-1.138
						-1.852
		-0.956
		-4.293				-0.465
						-3.107
		-0.848				-4.815
		-3.712
		-1.039				-0.541
		-1.117
						-2.971
						-0.803
						-0.209
						-0.938
						-5.782
						-2.929
		-1.138				-1.644
		-1.916
		-0.78				-1.709
		-5.333				-4.343
		-1.6				-0.432
						-0.501
		-1.91				-0.621
						-3.008
		-0.602
		-0.493				-1.77
		-0.62				-0.78
		-0.676
		-0.873
		-1.483				-0.84
						-1.262
		-1.566				-1.307
		-0.114				-2.539
						-2.442
		-2.339
						-2.05
						-0.638
		-1.604
		-0.949
		-1.741
		-1.872				-1.077
		-2.164				-1.834
						-0.106
						-0.608
						-3.308
						-2.07
		-1.746				-0.206
		-0.919
						-1.31
						-2.078
						-1.171
		-1.497				-0.984
						-1.063
		-2.239				-4.422
						-2.19
		-1.852				-0.735
		-1.255
						-0.803
		-2.5
		-3.366				-1.564
						-1.679
		-2.191
						-2.841
		-0.109				-1.121
						-2.266
		-4.663				-1.463
		-2.049				-0.999
						-4.435
		-1.196				-1.751
		-1.676				-0.837
						-2.65
		-2.107				-3.025
						-1.482
						-1.426
						-1.65
		-1.169
		-2.561
		-1.018				-0.412
						-1.791
		-2.759				-0.916
		-2.041				-1.386
						-1.776
						-2.394
		-2.925
		-1.478
		-1.509
		-2.006
		-2.823
		-0.127
		-2.323
		-1.248
		-1.681
		-0.787
		-2.804
		-3.236
		-3.184
		-2.561
		-0.825
		-2.466
		-0.168
		-4.632
		-0.963
		-2.389
		-0.794
		-0.772
		-1.75
		-1.125
		-0.942
		-1.796
		-2.622
		-2.75
		-2.185
		-0.112
		-0.505
		-2.058
		-0.977
		-0.943
		-0.364
		-1.068
		-1.935
		-2.362
		-1.708
		-1.96
		-1.769
		-2.221
		-1.276
		-2.698
		-2.158
		-2.317
		-1.575
		-0.303
		-1.704
		-2.179
		-1.351
		-4.385
		-2.114
		-0.471
		-3.82
		-1.478
		-1.262
		-1.928
		-3.416
		-0.476
		-1.899
		-0.644
		-1.934
		-0.429
		-1.9
		-3.345
		-1.234
		-0.502
		-2.036
		-2.609
		-0.944
		-5.42
		-1.109
		-1.288
		-2.859
	-3.653	-2.942			-3.653	-0.51
	-1.584				-1.584
	-3.855	-2.706			-3.855
	-0.961	-1.343			-0.961
	-2.978	-0.476			-2.978	-1.696
	-2.873	-0.684			-2.873	-1.049
	-1.758				-1.758	-5.7
		-2.261
		-0.291				-1.175
	-0.741	-2.126			-0.741	-1.505
	-2.354	-0.983			-2.354	-1.614
	-0.654				-0.654
		-1.684
	-0.958	-1.242			-0.958	-2.18
	-2.452				-2.452
	-1.165				-1.165
	-3.456				-3.456	-0.512
	-1.584				-1.584
		-3.634
		-1.238
	-4.459				-4.459
	-2.277	-2.027			-2.277
		-1.272				-2.408
		-1.671				-2.665
		-1.137				-1.218
		-3.137				-2.594
		-0.603				-2.881
	-1.071				-1.071	-2.431
	-1.193				-1.193	-0.635
	-2.966				-2.966	-2.679
						-1.908
	-2.614				-2.614
	-3.735	-0.599			-3.735	-4.76
		-0.548
		-2.746
	-2.829	-0.864			-2.829
	-2.339	-1.714			-2.339
	-1.056	-1.417			-1.056	-1.707
	-1.485	-0.898			-1.485	-3.348
	-3.617	-2.195			-3.617	-4.996
	-2.94				-2.94
	-2.955	-1.946			-2.955
	-2.52	-3.573			-2.52
	-0.517	-2.116			-0.517	-0.233
		-3.22				-4.394
		-0.191
	-1.647				-1.647	-1.496
						-2.102
	-5.126	-1.474			-5.126	-2.679
	-0.823	-1.291			-0.823
		-2.263
		-1.66
	-1.482				-1.482
		-1.039				-1.978
		-0.518				-1.267
		-2.211				-4.319
	-1.915				-1.915	-2.717
	-0.608	-2.903			-0.608	-2.174
	-3.023	-1.85			-3.023
						-3.494
	-0.98				-0.98
	-4.356				-4.356	-0.709
	-2.802				-2.802	-0.777
						-1.123
	-4.24				-4.24	-3.478
	-0.198	-0.384			-0.198	-0.77
	-0.226				-0.226
	-4.225	-2.652			-4.225	-0.525
	-1.233				-1.233	-0.741
	-1.611	-2.98			-1.611	-2.78
		-2.116				-1.402
	-0.13	-2.204			-0.13
	-3.615	-1.227			-3.615
	-1.423	-0.831			-1.423
	-0.216	-2.586			-0.216	-1.947
	-1.54	-2.18			-1.54	-2.468
		-0.837				-0.105
	-2.206	-2.119			-2.206	-0.447
		-0.64
		-2.121
	-3.618	-2.417			-3.618
	-0.976	-2.17			-0.976
	-2.364	-2.354			-2.364	-1.773
		-1.908
						-0.132
		-2.163				-3.2
		-1.673
		-1.041				-0.352
		-1.668				-1.208
		-1.775
		-2.58				-0.969
		-1.245				-1.764
						-2.67
	-0.161				-0.161	-1.936
		-0.938				-1.451
	-1.932	-0.293			-1.932
	-1.865	-0.235			-1.865
	-0.765	-0.236			-0.765
	-0.236				-0.236
	-1.568	-1.742			-1.568
		-1.111
	-1.165				-1.165
	-0.949				-0.949	-2.17
	-1.692				-1.692	-3.696
						-0.368
		-2.401
	-3.656				-3.656	-1.076
	-2.524				-2.524	-0.568
		-1.486
						-1.691
	-1.215				-1.215
						-2.044
	-2.115				-2.115	-6.159
	-0.738				-0.738	-2.678
	-0.931	-2.715			-0.931	-0.781
	-2.151	-0.715			-2.151
	-0.959	-1.538			-0.959	-1.149
		-1.666				-1.654
						-1.899
						-0.893
						-0.683
						-1.067
	-1.108				-1.108	-1.696
	-1.564	-0.437			-1.564
	-1.983	-0.766			-1.983
	-1.847	-1.393			-1.847	-1.004
		-1.402
	-2.886				-2.886	-4.176
		-0.223				-0.971
	-2.836				-2.836	-1.349
	-3.273				-3.273	-2.36
	-1.319				-1.319	-1.669
	-1.838	-2.101			-1.838
	-2.52				-2.52	-1.026
		-2.641				-3.314
	-1.835	-5.427			-1.835	-2.226
		-0.167
		-6.258				-0.734
		-0.856				-1.113
		-1.014				-1.198
	-3.855	-1.269			-3.855
						-4.897
	-3.834				-3.834
	-3.698				-3.698
						-0.743
	-1.094				-1.094
	-2.154				-2.154	-1.003
	-0.993				-0.993	-0.587
		-2.571				-0.649
		-3.32				-1.911
	-1.725	-0.486			-1.725
		-0.727
	-0.743				-0.743
	-1.11				-1.11
	-3.774				-3.774	-3.191
		-0.264				-0.281
	-3.274	-1.33			-3.274
	-1.293	-2.059			-1.293	-2.481
		-0.252
	-2.967	-0.315			-2.967	-1.812
		-1.834				-0.843
		-1.613				-2.021
	-1.895	-1.544			-1.895	-2.752
	-1.993	-2.783			-1.993	-0.682
	-2.97	-1.263			-2.97
	-1.267				-1.267	-1.664
	-2.886	-1.159			-2.886
	-1.017				-1.017	-0.611
		-1.423
	-0.65				-0.65	-0.908
	-0.157				-0.157	-1.455
	-3.057				-3.057	-2.996
						-1.591
	-2.095	-1.434			-2.095
	-3.506				-3.506	-1.17
	-0.234	-0.311			-0.234	-1.246
	-0.33				-0.33
	-0.382	-0.212			-0.382
						-4.262
		-0.324				-3.22
		-1.968
	-3.681	-1.921			-3.681
	-2.934				-2.934	-1.164
						-2.718
						-0.812
		-3.928
		-2.973				-2.23
	-1.808	-2.399			-1.808	-0.923
	-1.142				-1.142
	-1.336	-0.206			-1.336	-4.585
	-4.321				-4.321	-1.159
		-0.892				-1.089
		-1.567
	-3.774				-3.774
						-2.535
						-1.386
	-1.514				-1.514	-1.688
	-2.84				-2.84	-1.243
	-1.686				-1.686	-1.655
		-0.472
		-0.617
	-2.445	-3.041			-2.445	-5.144
	-0.998	-2.298			-0.998
		-0.479				-0.724
	-4.226	-1.699			-4.226	-3.686
		-3.296				-5.361
	-2.93	-4.913			-2.93	-0.506
	-1.212				-1.212
		-5.153				-0.862
	-0.63	-2.055			-0.63	-1.155
		-1.093
	-2.56				-2.56
	-2.066				-2.066	-5.393
	-2.576				-2.576	-5.816
	-3.959				-3.959
	-2.668				-2.668	-0.85
		-4.395				-1.85
		-3.392
	-1.603				-1.603	-0.638
		-0.57
	-0.238	-2.501			-0.238
		-2.236				-1.584
	-5.558	-0.63			-5.558	-2.892
	-1.543	-2.78			-1.543	-2.886
	-2.668	-2.754			-2.668	-0.638
		-0.821				-1.612
						-1.125
	-1.973				-1.973
						-1.169
	-3.798				-3.798
		-0.945				-2.841
		-1.027				-0.497
						-1.559
	-5.089				-5.089	-0.693
						-2.312
	-2.367				-2.367	-1.911
		-2.34				-0.768
	-1.602	-2.416			-1.602
	-1.049				-1.049	-1.339
						-1.406
						-3.545
		-1.571				-0.818
		-0.287
						-1.562
						-1.458
	-0.287				-0.287
		-0.268				-1.921
		-2.938
		-5.453
		-5.643				-2.283
		-2.665				-0.767
		-1.672				-0.955
	-1.755	-1.529			-1.755	-1.087
	-1.278				-1.278
	-4.991				-4.991	-0.469
	-1.178				-1.178	-0.892
	-0.446	-1.603			-0.446	-2.158
	-0.993				-0.993	-3.018
	-0.51				-0.51	-1.22
	-0.558	-1.228			-0.558
	-0.935	-2.057			-0.935	-1.536
		-2.661
	-0.144				-0.144	-2.919
		-1.567				-2.087
		-3.424				-2.16
		-2.004				-2.609
		-3.637
						-3.21
	-4.261				-4.261	-2.416
	-3.917				-3.917	-2.083
	-0.569				-0.569	-0.981
	-4.858				-4.858	-2.046
						-0.556
						-1.312
		-5.854				-2.26
	-2.354	-1.318			-2.354	-2.227
		-2.902				-0.595
	-4.036	-0.727			-4.036
	-2.209				-2.209
		-2.968				-3.555
		-5.439
	-5.246				-5.246	-2.402
		-0.827
		-2.874				-1.66
	-6.147	-3.69			-6.147
	-3.669				-3.669
	-2.817	-1.742			-2.817
	-0.517				-0.517	-4.361
	-0.795				-0.795
						-1.138
	-1.292	-2.21			-1.292
	-1.645	-0.437			-1.645
	-1.117	-1.251			-1.117	-2.921
		-2.627				-4.88
	-1.009				-1.009
		-3.595
		-0.167
	-1.431	-0.345			-1.431
	-1.604	-0.927			-1.604
	-0.636	-1.339			-0.636	-2.453
	-1.469				-1.469
	-2.436				-2.436	-1.021
						-3.366
	-0.446				-0.446	-1.478
		-2.388
		-3.184				-0.979
	-0.556	-1.57			-0.556	-0.476
						-0.553
	-2.006				-2.006
	-1.416	-1.934			-1.416	-1.531
						-1.875
	-0.446	-2.69			-0.446
						-0.303
						-1.674
	-2.953				-2.953
	-1.712				-1.712
	-0.594	-1.654			-0.594	-1.042
		-3.581
	-2.558	-3.248			-2.558	-2.972
						-3.361
						-0.693
						-1.847
						-1.43
						-2.372
		-1.716				-1.971
		-2.498
		-1.024
						-2.842
		-0.64				-1.553
	-3.058	-2.669			-3.058
	-0.515				-0.515
	-1.398				-1.398
	-1.43	-2.669			-1.43
	-0.198	-5.784			-0.198
	-0.93	-0.849			-0.93
	-2.209	-1.521			-2.209
	-2.403	-1.454			-2.403
	-1.45				-1.45	-1.369
	-1.798				-1.798
						-0.785
	-2.518				-2.518	-1.809
	-3.081				-3.081	-0.657
	-1.887	-0.963			-1.887	-2.249
	-2.584	-1.654			-2.584
	-1.578	-1.803			-1.578	-0.423
	-0.878	-2.042			-0.878	-4.688
	-2.288				-2.288	-1.566
	-2.284	-3.017			-2.284	-0.632
	-1.629				-1.629	-1.758
	-2.637	-2.852			-2.637	-2.983
		-3.214				-1.553
	-0.457	-3.15			-0.457	-0.223
						-2.679
		-2.39
		-0.422
	-0.114				-0.114	-1.477
	-2.86	-0.563			-2.86	-1.199
						-1.646
	-0.698				-0.698	-0.223
	-2.13	-3.375			-2.13	-1.46
	-1.575				-1.575	-0.287
						-1.404
	-1.631	-1.731			-1.631	-0.37
		-2.771				-1.709
	-1.106				-1.106	-1.206
	-1.276	-2.478			-1.276
	-4.224	-1.605			-4.224	-2.584
	-1.318	-3.411			-1.318
		-3.745
	-1.558				-1.558	-3.953
	-2.71	-0.437			-2.71	-2.322
	-1.777				-1.777
						-0.37
						-1.337
	-1.61	-1.07			-1.61
	-3.654	-1.293			-3.654	-0.759
	-1.381	-1.59			-1.381
						-0.605
		-1.097
	-4.589	-3.223			-4.589
	-5.204	-2.866			-5.204	-1.337
	-0.198				-0.198	-1.722
		-1.763				-1.503
		-1.439				-1.693
		-2.785				-2.268
	-0.79				-0.79
	-1.708	-1.33			-1.708
						-2.369
	-2.352				-2.352
		-1.644				-1.751
						-1.337
	-2.406				-2.406
	-1.542				-1.542
		-5.108				-1.428
		-2.711				-0.972
	-2.411				-2.411
						-0.758
						-3.219
						-2.377
	-1.053				-1.053	-0.656
	-2.549				-2.549	-0.407
	-2.64				-2.64
						-3.381
	-2.488	-0.757			-2.488
	-0.504	-0.472			-0.504
		-4.331				-2.577
		-5.208
		-1.604				-3.929
		-1.787
	-2.123				-2.123
	-2.068	-2.897			-2.068	-1.672
		-0.431				-1.196
		-2.091
	-1.59	-2.118			-1.59	-1.731
	-2.831	-2.302			-2.831
	-4.062				-4.062
		-2.533
		-0.514				-0.171
	-3.178	-1.401			-3.178	-3.785
	-0.113				-0.113	-2.704
		-1.57
		-2.505				-1.704
	-1.576				-1.576	-1.109
	-1.479				-1.479	-0.16
	-3.679				-3.679	-0.153
		-0.615				-2.278
		-0.22
	-0.574	-0.688			-0.574	-4.016
	-0.464				-0.464	-0.744
	-0.129	-1.194			-0.129	-0.407
	-1.234				-1.234	-0.953
	-0.492	-2.406			-0.492
	-0.502				-0.502
	-2.677				-2.677	-0.119
	-0.453				-0.453
		-0.829				-1.605
		-0.623				-2.253
		-0.539
	-0.796	-0.838			-0.796	-2.077
		-1.061
		-2.542
	-0.152	-0.265			-0.152	-0.932
	-4.586	-0.968			-4.586	-0.465
	-1.782				-1.782
		-0.503				-0.867
	-5.397	-0.383			-5.397	-0.9
	-5.71	-0.259			-5.71
	-3.939	-1.734			-3.939
	-6.014				-6.014
	-4.738	-1.197			-4.738
		-1.176
	-2.135	-2.79			-2.135
	-5.011	-0.65			-5.011
		-1.138
		-0.525
	-4.811				-4.811
		-0.608
	-1.893	-2.049			-1.893
						-1.145
		-1.481				-1.106
		-2.085
	-0.977				-0.977	-3.079
	-0.702	-0.67			-0.702	-0.772
	-1.108	-1.2			-1.108	-1.245
	-2.343	-0.121			-2.343	-3.629
	-0.538				-0.538	-1.693
	-0.687				-0.687
	-2.704	-1.844			-2.704	-3.919
	-2.809	-0.686			-2.809	-2.432
	-4.144	-1.962			-4.144	-0.58
		-0.611				-2.566
	-0.94				-0.94
		-1.783
	-2.13				-2.13	-2.41
	-2.232				-2.232	-2.494
		-1.298				-1.833
	-3.642	-1.569			-3.642	-5.538
		-1.093				-4.399
	-2.276	-0.955			-2.276	-0.496
	-0.115	-3.626			-0.115	-1.636
		-0.945				-2.638
		-2.218
		-2.914
		-0.691				-1.765
						-1.651
						-1.095
		-2.625				-1.549
						-1.456
						-1.512
						-1.506
						-1.035
	-1.798				-1.798	-1.148
	-0.824				-0.824	-2.232
	-1.338				-1.338	-1.729
	-1.64				-1.64
	-0.733				-0.733
	-1.643				-1.643
	-1.264				-1.264
						-1.473
	-2.342				-2.342	-1.13
	-1.495				-1.495
	-0.786				-0.786
		-3.058
		-2.18
	-1.888	-3.44			-1.888
	-1.546	-2.729			-1.546
		-3.711				-0.196
	-2.817	-3.495			-2.817	-1.636
		-1.657				-1.318
	-1.567	-2.745			-1.567	-2.937
		-2.574				-1.171
		-5.065
		-4.515
						-1.272
						-1.247
						-1.14
						-1.388
	-2.125				-2.125	-0.297
	-3.479				-3.479	-1.995
						-0.948
	-2.98				-2.98	-2.677
	-0.867				-0.867
	-1.643				-1.643
	-2.599	-1.551			-2.599	-0.223
	-1.148	-1.584			-1.148	-1.648
	-0.401	-1.856			-0.401
	-3.635				-3.635	-1.562
	-2.886				-2.886	-0.918
	-1.577	-1.516			-1.577	-0.697
	-1.643	-6.752			-1.643	-2.59
	-1.719	-2.057			-1.719	-0.729
		-1.478				-2.606
		-0.753				-1.655
		-2.307				-2.777
		-5.559				-0.562
	-2.499	-3.871			-2.499	-1.372
	-2.134				-2.134	-0.267
	-3.075	-2.32			-3.075
	-3.028	-0.502			-3.028
		-0.899				-1.941
		-2.814				-0.917
						-1.727
	-0.208	-2.137			-0.208	-6.818
	-2.287				-2.287	-2.321
	-0.942	-1.898			-0.942
						-0.942
	-1.187				-1.187
						-3.75
	-0.923				-0.923	-3.125
	-0.232	-3.084			-0.232
	-1.876	-2.534			-1.876	-0.574
	-1.313	-2.482			-1.313	-1.904
		-2.222
	-1.852				-1.852
		-2.699
	-1.876	-1.721			-1.876	-1.562
		-0.401				-4.444
	-1.489				-1.489	-0.1
	-4.02				-4.02	-0.781
		-1.115
	-1.036				-1.036	-0.893
	-1.145				-1.145
	-1.854				-1.854	-1.19
		-1.287				-0.574
		-2.368				-4.423
	-0.689	-0.728			-0.689	-0.374
	-1.622	-2.887			-1.622
	-2.122	-1.46			-2.122
		-1.975				-1.655
		-1.179
	-3.808				-3.808
		-0.991
	-0.841				-0.841
	-0.493				-0.493	-0.577
	-0.937				-0.937	-0.238
	-3.694				-3.694	-1.451
						-1.833
	-2.958	-2.402			-2.958
	-0.309	-0.137			-0.309	-0.67
	-1.626	-1.798			-1.626
	-3.394	-2.023			-3.394	-0.199
	-3.45	-2.229			-3.45	-0.616
		-2.566				-0.449
		-2.183
	-4.011				-4.011	-0.807
						-0.897
	-2.986				-2.986
	-1.754	-2.114			-1.754	-1.075
		-0.237				-1.821
	-2.963				-2.963	-3.304
		-4.597
						-2.064
	-4.011				-4.011	-1.265
	-2.267	-2.462			-2.267	-1.71
						-2.815
	-3.566	-1.02			-3.566	-0.117
	-2.05	-2.399			-2.05
		-1.857				-1.341
		-0.328				-1.01
		-3.854				-1.806
	-3.225				-3.225
		-0.529				-3.493
	-1.668				-1.668	-1.006
	-3.21	-0.669			-3.21	-3.926
	-1.826				-1.826
		-2.087
	-5.408				-5.408
	-6.135				-6.135	-2.631
	-4.334				-4.334
	-5.906				-5.906
	-4.109				-4.109
						-0.258
						-3.444
	-0.276				-0.276	-3.55
	-0.67				-0.67	-1.831
						-1.981
	-3.735	-1.448			-3.735	-1.703
		-1.293				-1.592
	-3.233	-1.027			-3.233	-2.035
		-1.237				-2.943
	-1.653	-2.414			-1.653	-1.207
	-2.233	-3.233			-2.233	-2.246
	-3.775	-0.851			-3.775	-1.584
	-2.551	-2.321			-2.551	-2.493
						-1.549
	-1.732				-1.732	-1.704
	-1.393				-1.393
	-0.412				-0.412	-4.711
	-2.014				-2.014
	-1.897				-1.897	-4.088
	-0.983	-1.614			-0.983	-1.239
	-1	-1.194			-1	-2.498
	-0.268	-1.514			-0.268	-0.186
	-1.648	-0.402			-1.648	-2.436
	-2.136	-1.822			-2.136	-4.382
	-0.892				-0.892	-0.196
	-1.69				-1.69	-4.911
	-1.07				-1.07	-1.979
	-0.26				-0.26	-0.547
	-1.463	-1.752			-1.463	-0.909
	-2.031	-3.284			-2.031
	-2.787				-2.787
		-0.427
	-3.078	-2.518			-3.078
		-0.962				-1.769
						-2.062
	-0.963				-0.963
	-1.523				-1.523	-1.856
						-1.832
	-1.676				-1.676	-6.044
		-2.711				-4.64
	-1.043	-2.108			-1.043	-0.563
	-2.689	-1.775			-2.689	-1.004
	-2.081				-2.081	-3.654
		-1.489				-0.747
		-1.893				-0.316
		-0.99				-0.669
		-1.482				-4.016
						-0.977
						-1.841
	-2.907	-1.723			-2.907
	-5.97				-5.97	-2.822
	-2.021	-1.947			-2.021
	-0.711	-0.185			-0.711
	-0.644				-0.644
	-0.501				-0.501
	-2.301				-2.301	-4.758
	-0.767	-1.582			-0.767	-3.56
	-0.86				-0.86	-3.399
		-1.339				-1.502
	-1.686				-1.686	-1.299
	-1.367				-1.367
	-2.048				-2.048
	-0.501	-1.832			-0.501
	-2.708	-2.678			-2.708	-1.928
	-2.496				-2.496	-2.075
		-3.019				-1.1
		-0.152
		-1.645
	-1.778	-1.246			-1.778
		-0.638
	-2.459	-1.841			-2.459	-1.766
	-2.348				-2.348	-1.839
	-3.747	-4.08			-3.747	-1.049
	-0.335				-0.335	-2.675
						-3.795
	-1.777				-1.777	-4.203
		-1.952				-1.146
	-4.925	-0.88			-4.925
	-4.253				-4.253
		-2.325
	-2.063				-2.063
	-0.84				-0.84	-0.733
	-1.171	-1.819			-1.171	-1.548
						-1.938
	-2.677				-2.677	-0.865
						-0.333
	-1.46				-1.46
	-1.004	-1.93			-1.004
	-0.833	-2.944			-0.833	-2.252
	-2.77	-2.218			-2.77
		-2.848
	-1.029	-1.959			-1.029	-1.89
						-0.667
		-2.141
						-1.235
	-0.389	-3.469			-0.389
		-2.026				-2.223
		-3.455
		-3.542
						-1.413
						-1.348
						-0.433
		-2.956
	-1.257	-3.254			-1.257
	-1.799				-1.799	-4.307
	-1.645	-1.718			-1.645	-4.919
	-2.43	-1.115			-2.43
	-2.52	-1.5			-2.52
		-0.65
	-2.674	-3.398			-2.674	-1.431
		-3.251
	-0.588	-1.834			-0.588	-2.742
		-0.994				-1.677
		-5.215				-0.567
		-0.248
	-2.853				-2.853	-0.288
	-1.337				-1.337
		-1.858
	-3.371	-0.837			-3.371
	-0.198	-2.295			-0.198
	-1.7	-1.238			-1.7	-3.918
	-2.739	-2.117			-2.739	-1.423
	-0.624	-0.618			-0.624
	-2.102				-2.102
	-2.052				-2.052
	-3.8				-3.8
	-2.719				-2.719
	-3.21				-3.21
		-0.699
	-3.638				-3.638
		-0.957
	-2.297	-2.841			-2.297
	-2.421				-2.421
	-0.991	-0.586			-0.991
		-0.484
		-1.042
	-2.277				-2.277
		-1.892
		-2.333
	-0.669	-0.973			-0.669
		-3.737
		-0.424
	-1.902	-1.939			-1.902
		-2.118
		-0.349
		-3.739
	-1.88	-3.655			-1.88
	-0.868				-0.868
	-0.834	-0.242			-0.834
	-2.047	-0.975			-2.047
	-0.592				-0.592
	-0.847				-0.847
	-1.941	-2.643			-1.941
	-1.147				-1.147
	-1.438	-1.881			-1.438
		-2.136
		-0.894
		-3.609
	-0.295				-0.295
	-2.476	-1.89			-2.476
	-1.095	-3.016			-1.095
	-2.183	-1.128			-2.183
	-1.577				-1.577
	-1.566				-1.566
	-2.006	-1.656			-2.006
	-1.616				-1.616
		-1.111
	-1.202				-1.202
	-1.248				-1.248
		-1.803
		-2.204
		-1.221
		-1.251
		-1.119
		-2.498
		-1.81
		-0.963
		-2.337
		-0.511
		-1.271
		-1.283
		-1.723
		-1.102
		-1.226
		-0.451
		-0.878
		-0.321
		-2.733
		-1.222
		-1.295
		-1.729
		-2.247
		-3.147
		-1.97
		-3.263
		-3.041
		-4.157
		-0.891
		-2.976
		-1.258
		-1.375
		-1.346
		-1.71
		-0.998
		-3.589
		-0.237
		-0.573
		-3.12
		-3.505
		-1.231
		-4.619
		-2.507
		-1.337
		-2.343
		-1.468
	-2.03	-1.346			-2.03	-3.424
	-2.576				-2.576
	-1.409				-1.409
	-1.079				-1.079
	-0.282				-0.282	-2.031
	-0.591				-0.591	-1.81
						-2.962
						-1.958
	-1.937				-1.937	-1.398
						-1.617
	-1.02				-1.02	-2.335
	-0.745	-3.709			-0.745	-0.815
	-1.941	-3.14			-1.941	-1.42
						-2.545
		-2.694				-3.038
		-1.533				-0.496
		-0.191
	-2.943	-2.902			-2.943
	-2.486				-2.486	-3.524
		-1.731
	-1.474	-2.239			-1.474
	-2.632	-2.552			-2.632
	-2.394	-3.872			-2.394
	-0.602	-3.21			-0.602
		-3.14
		-2.26				-0.862
	-1.177	-0.115			-1.177	-1.395
	-1.141	-4.263			-1.141	-3.684
	-0.536	-0.38			-0.536	-1.093
	-1.673	-2.957			-1.673	-0.466
						-2.248
	-1.474	-2.649			-1.474
	-0.735	-4.013			-0.735	-1.494
	-2.831				-2.831	-2.451
		-1.216
	-5.107				-5.107
		-4.28
	-4.59				-4.59	-1.115
		-2.27				-0.334
	-6.252	-3.253			-6.252	-0.255
	-3.248	-3.167			-3.248	-0.502
						-0.365
						-0.606
						-1.23
	-2.824				-2.824
	-2.081	-0.638			-2.081
	-0.759				-0.759	-1.09
	-1.146				-1.146	-1.204
						-1.485
	-4.331	-0.955			-4.331	-1.739
		-0.704				-1.873
		-0.376				-0.772
		-0.141				-0.565
		-0.892
	-1.802				-1.802
	-2.685	-3			-2.685
		-3.477				-2.887
	-3.781	-0.178			-3.781
	-2.13	-3.643			-2.13	-2.587
		-1.264
		-1.444				-2.049
	-1.144				-1.144
						-3.717
	-1.109	-0.574			-1.109	-1.133
						-2.352
		-1.457
	-2.199				-2.199	-3.423
						-1.06
		-1.339				-0.657
		-0.462				-0.243
	-2.344				-2.344
						-2.268
	-1.155				-1.155	-1.392
	-1.229	-3.385			-1.229	-0.29
		-1.94
	-1.476	-2.153			-1.476	-1.149
	-1.448				-1.448	-2.032
	-0.602	-2.418			-0.602	-1.518
	-4.319				-4.319
		-3.791				-0.631
		-2.28
	-2.271	-1.663			-2.271	-2.878
	-2.591	-2.393			-2.591	-2.207
		-4.107
						-1.229
	-2.5				-2.5	-3.838
	-2.144				-2.144	-0.526
						-2.075
	-2.68				-2.68	-0.703
	-1.16				-1.16	-2.098
	-3.643				-3.643
		-1.116				-1.841
	-0.596	-2.264			-0.596
	-1.15	-1.339			-1.15
		-0.885
		-2.038
		-2.425
		-3.943
						-2.189
	-1.22				-1.22
	-3.529				-3.529	-0.404
		-0.436
	-1.15	-2.527			-1.15
	-0.988				-0.988
	-1.893	-1.621			-1.893
	-1.489				-1.489
						-0.991
	-1.039	-1.148			-1.039
	-2.722	-2.765			-2.722
	-1.608	-1.468			-1.608
		-1.532
	-3.411	-0.648			-3.411	-1.363
	-0.922	-1.996			-0.922	-2.286
						-1.807
	-1.553				-1.553
	-2.233				-2.233	-1.175
	-1.171	-1.225			-1.171
	-2.365	-2.215			-2.365
	-0.569	-2.209			-0.569	-4.349
						-2.6
		-1.186				-1.714
		-2.232				-0.583
	-3.106				-3.106	-1.787
		-1.492				-1.097
	-0.518				-0.518
	-3.81				-3.81	-0.394
						-0.718
	-1.059				-1.059
	-0.379				-0.379
		-2.654
		-0.42				-2.348
		-2.63				-3.607
		-2.461				-2.676
	-1.242	-1.152			-1.242	-1.305
						-3.887
	-2.359				-2.359	-3.479
						-1.972
						-0.334
	-0.807	-1.499			-0.807
		-2.574				-1.726
	-1.106				-1.106	-0.426
	-0.405				-0.405
	-1.989				-1.989
	-1.196				-1.196	-0.236
		-0.547
	-2.252	-0.412			-2.252	-1.911
	-3.767				-3.767
	-2.251	-2.23			-2.251	-1.864
		-3.901				-0.439
		-2.358
	-0.305				-0.305
		-0.338
	-0.678	-2.068			-0.678
		-2.095				-3.069
	-1.055	-2.459			-1.055
	-1.634				-1.634
		-2.355				-2.472
	-0.421				-0.421	-2.101
	-2.228				-2.228	-0.467
	-1.211				-1.211	-2.599
						-2.14
	-1.534	-0.365			-1.534
	-1.092				-1.092
		-0.35
		-2.551				-1.003
	-1.973	-0.545			-1.973
						-1.338
		-2.249
	-3.037	-1.39			-3.037
		-2.19				-1.402
	-0.263				-0.263
	-2.301				-2.301	-2.867
						-1.041
						-0.706
		-2.081
	-0.286	-1.513			-0.286
		-1.464				-2.777
		-1.756
		-1.029				-0.634
						-2.325
		-0.834				-0.197
						-2.431
		-1.872				-1.651
		-0.365
	-1.996				-1.996	-0.655
	-1.439	-1.217			-1.439
		-1.363
	-3.234				-3.234	-1.984
	-0.846	-1.588			-0.846	-5.523
	-2.853	-2.035			-2.853
	-0.143	-0.287			-0.143
	-1.053	-0.422			-1.053	-1.827
	-0.838				-0.838	-3.465
						-0.555
						-1.339
	-0.11				-0.11	-2.404
		-0.736				-4.061
						-1.973
						-1.19
	-2.423				-2.423	-3.109
						-0.348
	-3.154				-3.154	-1.811
	-0.508				-0.508	-3.28
	-2.43				-2.43	-5.021
		-0.864				-4.495
						-2.395
						-1.522
	-1.613	-1.658			-1.613
		-1.319
	-0.86	-1.421			-0.86	-0.76
		-1.664
		-3.319				-3.756
	-3.193				-3.193	-1.503
	-1.04				-1.04
						-5.078
		-3.375				-3.803
	-3.322	-2.635			-3.322
	-3.198				-3.198
	-1.675	-1.049			-1.675
		-1.639
						-1.07
	-5.394				-5.394
						-2.452
	-3.211				-3.211	-0.193
	-2.285				-2.285
	-3.998	-0.179			-3.998
						-1.119
		-0.387				-1.32
		-2.679
						-3.522
		-1.339				-5.144
		-1.078
		-0.335
	-4.508	-2.67			-4.508	-1.56
	-2.193				-2.193
	-1.813				-1.813
		-2.897
		-2.053
		-2.111				-2.037
	-0.314				-0.314	-4.184
						-3.639
		-2.698				-1.093
		-2.143				-1.369
		-1.247
	-2.993				-2.993
	-1.436				-1.436
	-1.851				-1.851	-0.63
	-2.072				-2.072	-1.079
		-1.744				-3.241
		-1.599
	-2.933				-2.933
		-2.498				-0.765
		-2.11				-1.535
						-2.202
		-0.446
						-0.524
		-0.963				-3.271
	-0.783	-3.393			-0.783	-0.669
		-2.926
	-0.121				-0.121
						-0.973
	-0.801				-0.801
	-1.125				-1.125
						-3.427
						-3.599
	-6.205	-1.982			-6.205	-3.047
		-1.541				-3.853
	-4.316	-1.33			-4.316	-3.4
		-1.826
		-0.346				-0.497
		-2.443				-4.164
						-1.508
		-0.895
		-0.417				-1.042
		-2.757				-0.282
	-0.697				-0.697
	-1.204				-1.204	-5.628
	-0.535				-0.535
		-0.594
	-1.263	-0.299			-1.263	-1.827
	-2.212	-5.118			-2.212
	-4.059				-4.059
	-1.491	-0.356			-1.491	-1.875
	-4.62	-0.228			-4.62
	-2.69				-2.69
	-3.211	-4.092			-3.211
	-3.425	-0.446			-3.425	-0.344
						-0.817
		-0.706
	-0.618				-0.618	-3.283
		-1.009
						-2.287
	-0.944				-0.944	-1.069
						-2.465
						-1.978
	-0.166				-0.166	-1.497
	-0.82	-2.473			-0.82	-1.339
	-2.143	-1.699			-2.143	-1.339
	-0.845	-2.162			-0.845	-5.238
		-0.953				-5.267
		-2.135				-3.835
		-1.122
		-0.643
		-1.585				-0.912
						-0.916
	-0.93				-0.93	-3.236
		-1.046
		-2.15
	-0.843	-0.882			-0.843
	-0.606				-0.606
	-0.719				-0.719	-1.243
	-0.668				-0.668
		-0.781
	-1.95				-1.95
	-1.553	-1.612			-1.553
	-1.785	-0.135			-1.785
	-1.182				-1.182
	-2.098				-2.098
	-0.495				-0.495	-2.659
	-1.636				-1.636
	-1.636	-2.75			-1.636	-3.209
		-2.863				-3.204
		-5.652
						-2.24
	-2.003	-1.737			-2.003
	-3.338				-3.338
	-1.814	-1.311			-1.814
		-0.647
						-1.109
	-2.057				-2.057	-1.573
	-1.089				-1.089	-3.266
	-2.999				-2.999
	-0.971				-0.971	-0.357
						-0.769
	-0.385	-1.444			-0.385	-1.8
		-2.24				-1.339
		-0.239
		-1.479
	-2.123	-1.32			-2.123
	-1.591	-1.399			-1.591	-1.813
						-1.562
						-1.709
						-0.416
	-1.206	-0.478			-1.206	-0.403
	-1.075				-1.075
	-2.332				-2.332	-0.497
	-2.518				-2.518
	-3.37				-3.37
	-0.993				-0.993
	-0.474				-0.474
						-2.606
						-0.567
	-2.785				-2.785
						-2.073
	-0.223				-0.223
		-3.375
	-1.751	-0.979			-1.751
	-0.534	-1.517			-0.534	-4.367
		-1.91				-2.946
		-1.885
		-0.67				-2.25
		-1.851				-1.716
		-0.916
		-0.33
		-2.055
	-3.336				-3.336
	-2.224	-1.586			-2.224
	-2.052	-0.756			-2.052
	-1.831				-1.831	-4.299
		-2.349				-3.606
		-0.236				-1.202
	-2.214	-2.874			-2.214	-1.133
		-0.191				-0.743
	-1.216	-0.446			-1.216
		-1.806				-1.338
		-2.282
		-1.957				-2.411
		-1.212
		-0.774				-1.833
		-0.665				-1.036
		-0.727				-0.279
		-2.053				-5.441
		-1.451				-0.268
	-1.023	-2.608			-1.023	-0.393
	-3.416	-2.678			-3.416	-0.798
						-0.337
						-1.15
						-1.48
	-4.094	-0.778			-4.094	-0.837
	-2.614				-2.614	-1.236
	-4.257	-0.298			-4.257	-0.157
						-1.198
						-2.33
	-1.554	-1.92			-1.554	-0.223
	-2.722				-2.722	-4.17
	-3.148	-3.519			-3.148	-2.089
	-0.223				-0.223	-0.958
						-3.186
	-0.635				-0.635
						-0.953
						-0.359
	-2.439	-1.369			-2.439	-0.867
	-3.501	-3.076			-3.501	-0.715
	-3.465				-3.465
	-0.995	-1.339			-0.995
	-1.807	-0.195			-1.807
	-1.639				-1.639
						-1.627
		-2.024
	-0.298	-3.072			-0.298
	-2.876	-2.224			-2.876	-1.396
	-4.802				-4.802	-2.68
						-0.952
	-4.366				-4.366
		-1.64				-0.698
		-1.872
	-2.134	-3.732			-2.134	-3.154
	-1.364	-3.916			-1.364	-0.934
	-5.534				-5.534	-0.357
		-1.497
						-4.967
		-2.16
	-0.88	-2.366			-0.88
						-0.361
						-0.183
	-0.153				-0.153
		-2.766				-2.421
	-0.502				-0.502
		-0.478				-0.483
	-3.214	-2.435			-3.214	-1.44
	-1.128	-0.591			-1.128
	-2.498	-3.329			-2.498
		-4.342				-1.285
		-3.76
	-0.818	-3.373			-0.818	-1.368
	-0.972	-2.051			-0.972
	-2.556	-2.161			-2.556	-4.054
		-4.682				-1.422
		-2.675				-2.976
						-0.679
						-2.682
	-1.754	-1.829			-1.754	-0.536
		-3.705				-1.341
	-1.515				-1.515	-2.857
		-4.013				-2.682
[truncated: 524 more rows]
