# Supplementary material for: Huntingtin recruits KIF1A to transport synaptic vesicle precursors along the mouse axon to support synaptic transmission and motor skill learning
Source: eLife. 2023 Jul 11;12:e81011. doi: 10.7554/eLife.81011 (PMC10365837; doi:10.7554/eLife.81011)
Supplement: Figure 3—figure supplement 1—source data 1. [file elife-81011-fig3-figsupp1-data1.xlsx]

## Sheet: all the amp
Wild-type	HTT-SD	HTT-SA
4.025	4.028	4.089
4.053	4.15	4.333
4.179	4.211	4.395
4.19	4.333	4.597
4.211	4.395	4.624
4.287	4.517	4.7
4.313	4.635	4.7
4.333	4.639	4.761
4.371	4.7	4.761
4.444	4.71	4.815
4.456	4.757	4.883
4.517	4.761	4.944
4.574	4.761	4.944
4.639	4.818	5.005
4.639	4.822	5.005
4.7	4.822	5.066
4.767	4.883	5.127
4.777	4.883	5.127
4.795	4.921	5.127
4.856	4.922	5.188
4.883	4.937	5.249
4.883	4.941	5.31
4.944	4.942	5.31
5.005	4.944	5.313
5.008	5.005	5.371
5.066	5.005	5.371
5.066	5.005	5.371
5.066	5.005	5.388
5.066	5.005	5.407
5.114	5.048	5.432
5.118	5.066	5.432
5.127	5.084	5.493
5.127	5.11	5.493
5.127	5.127	5.493
5.127	5.127	5.498
5.153	5.127	5.528
5.162	5.127	5.554
5.179	5.151	5.554
5.188	5.159	5.554
5.188	5.168	5.554
5.188	5.208	5.554
5.188	5.246	5.556
5.212	5.249	5.568
5.213	5.249	5.568
5.249	5.249	5.615
5.249	5.301	5.615
5.257	5.305	5.615
5.272	5.31	5.615
5.305	5.31	5.615
5.309	5.31	5.617
5.31	5.31	5.676
5.31	5.324	5.737
5.339	5.351	5.737
5.352	5.371	5.737
5.357	5.371	5.737
5.359	5.374	5.737
5.432	5.394	5.737
5.432	5.402	5.737
5.432	5.41	5.798
5.432	5.412	5.798
5.441	5.429	5.798
5.481	5.435	5.798
5.482	5.439	5.798
5.493	5.465	5.856
5.493	5.486	5.859
5.493	5.488	5.859
5.493	5.493	5.92
5.522	5.493	5.92
5.546	5.493	5.92
5.553	5.52	5.92
5.554	5.55	5.981
5.554	5.554	5.981
5.554	5.554	5.981
5.554	5.586	5.981
5.609	5.615	5.981
5.615	5.615	5.981
5.615	5.617	5.981
5.615	5.629	5.981
5.615	5.629	5.981
5.624	5.636	6.001
5.626	5.649	6.042
5.663	5.654	6.042
5.663	5.676	6.042
5.674	5.676	6.042
5.676	5.676	6.042
5.676	5.676	6.042
5.676	5.676	6.042
5.676	5.676	6.042
5.676	5.686	6.042
5.677	5.695	6.042
5.682	5.7	6.075
5.705	5.717	6.083
5.711	5.734	6.104
5.737	5.737	6.104
5.737	5.737	6.104
5.737	5.737	6.104
5.737	5.737	6.124
5.752	5.737	6.145
5.798	5.737	6.165
5.798	5.758	6.165
5.807	5.794	6.165
5.829	5.795	6.165
5.835	5.798	6.165
5.84	5.798	6.165
5.848	5.798	6.165
5.859	5.798	6.165
5.859	5.798	6.165
5.859	5.798	6.177
5.859	5.8	6.226
5.86	5.824	6.226
5.875	5.859	6.226
5.92	5.859	6.226
5.92	5.859	6.226
5.92	5.859	6.226
5.92	5.859	6.226
5.92	5.859	6.226
5.94	5.865	6.259
5.95	5.87	6.287
5.951	5.877	6.287
5.976	5.92	6.287
5.979	5.92	6.287
5.981	5.92	6.287
5.981	5.92	6.287
5.981	5.92	6.287
5.981	5.92	6.287
5.981	5.944	6.287
5.981	5.964	6.287
5.981	5.965	6.287
5.996	5.971	6.348
5.997	5.976	6.348
6.016	5.981	6.348
6.025	5.981	6.348
6.042	5.981	6.348
6.042	5.981	6.348
6.042	5.981	6.348
6.042	5.981	6.409
6.043	5.981	6.409
6.104	6.007	6.409
6.104	6.015	6.409
6.104	6.023	6.409
6.104	6.026	6.409
6.104	6.031	6.438
6.104	6.036	6.439
6.118	6.042	6.47
6.154	6.042	6.47
6.165	6.042	6.47
6.165	6.042	6.479
6.165	6.042	6.517
6.165	6.042	6.521
6.165	6.05	6.531
6.181	6.06	6.531
6.19	6.085	6.531
6.215	6.09	6.531
6.226	6.093	6.531
6.226	6.104	6.531
6.226	6.104	6.531
6.226	6.104	6.531
6.226	6.104	6.531
6.226	6.104	6.531
6.226	6.104	6.592
6.226	6.104	6.592
6.226	6.113	6.592
6.256	6.117	6.592
6.273	6.12	6.592
6.277	6.12	6.64
6.287	6.121	6.653
6.287	6.13	6.653
6.287	6.142	6.653
6.287	6.15	6.653
6.29	6.154	6.653
6.293	6.162	6.653
6.302	6.165	6.655
6.307	6.165	6.681
6.308	6.165	6.714
6.319	6.165	6.714
6.325	6.167	6.714
6.329	6.204	6.714
6.335	6.216	6.714
6.336	6.219	6.714
6.339	6.221	6.714
6.346	6.226	6.716
6.348	6.226	6.775
6.348	6.226	6.775
6.348	6.227	6.775
6.348	6.24	6.775
6.348	6.245	6.775
6.348	6.249	6.775
6.348	6.268	6.775
6.361	6.274	6.775
6.363	6.287	6.775
6.364	6.287	6.812
6.396	6.287	6.832
6.398	6.287	6.836
6.404	6.287	6.836
6.409	6.287	6.836
6.409	6.287	6.836
6.409	6.287	6.836
6.409	6.303	6.836
6.409	6.31	6.848
6.409	6.311	6.872
6.409	6.323	6.88
6.409	6.334	6.897
6.409	6.348	6.897
6.409	6.348	6.897
6.409	6.348	6.927
6.409	6.348	6.958
6.411	6.348	6.958
6.414	6.353	6.958
6.418	6.363	6.958
6.419	6.373	6.958
6.425	6.377	6.958
6.429	6.384	6.958
6.458	6.385	6.958
6.469	6.409	6.958
6.47	6.409	7.007
6.47	6.409	7.019
6.47	6.409	7.019
6.47	6.409	7.019
6.47	6.414	7.019
6.47	6.415	7.019
6.47	6.422	7.019
6.473	6.435	7.019
6.478	6.452	7.019
6.501	6.47	7.019
6.502	6.47	7.019
6.531	6.47	7.019
6.531	6.47	7.045
6.531	6.47	7.049
6.531	6.47	7.064
6.531	6.47	7.064
6.531	6.47	7.08
6.531	6.47	7.08
6.531	6.47	7.08
6.531	6.47	7.08
6.531	6.474	7.08
6.531	6.475	7.08
6.531	6.503	7.08
6.532	6.531	7.141
6.536	6.531	7.141
6.536	6.531	7.141
6.564	6.531	7.141
6.582	6.531	7.141
6.587	6.531	7.141
6.592	6.533	7.141
6.592	6.545	7.141
6.592	6.556	7.141
6.592	6.566	7.141
6.592	6.569	7.144
6.592	6.57	7.149
6.592	6.571	7.158
6.599	6.58	7.188
6.614	6.585	7.202
6.62	6.592	7.202
6.62	6.592	7.202
6.632	6.592	7.202
6.633	6.592	7.202
6.637	6.592	7.202
6.645	6.592	7.202
6.651	6.592	7.202
6.653	6.592	7.202
6.653	6.592	7.202
6.653	6.595	7.202
6.653	6.624	7.202
6.653	6.653	7.202
6.714	6.653	7.202
6.714	6.653	7.224
6.714	6.653	7.23
6.714	6.653	7.231
6.714	6.653	7.236
6.714	6.653	7.263
6.714	6.653	7.263
6.714	6.658	7.263
6.742	6.668	7.263
6.768	6.697	7.263
6.77	6.698	7.263
6.771	6.7	7.263
6.774	6.706	7.263
6.775	6.707	7.278
6.775	6.709	7.285
6.775	6.714	7.317
6.775	6.714	7.324
6.775	6.714	7.324
6.775	6.714	7.324
6.775	6.719	7.324
6.775	6.729	7.324
6.775	6.737	7.324
6.775	6.743	7.324
6.785	6.746	7.324
6.786	6.749	7.324
6.807	6.754	7.324
6.82	6.767	7.324
6.82	6.769	7.324
6.836	6.775	7.324
6.836	6.783	7.324
6.836	6.785	7.324
6.836	6.823	7.335
6.836	6.825	7.351
6.836	6.836	7.383
6.836	6.836	7.385
6.836	6.836	7.385
6.836	6.836	7.385
6.836	6.836	7.385
6.845	6.836	7.385
6.845	6.836	7.385
6.847	6.836	7.385
6.851	6.836	7.385
6.857	6.836	7.385
6.872	6.845	7.385
6.897	6.849	7.398
6.897	6.85	7.425
6.897	6.855	7.428
6.897	6.857	7.446
6.897	6.857	7.446
6.897	6.858	7.446
6.897	6.897	7.446
6.897	6.897	7.446
6.897	6.897	7.446
6.897	6.897	7.446
6.902	6.897	7.446
6.904	6.897	7.446
6.918	6.897	7.446
6.919	6.897	7.446
6.929	6.897	7.446
6.93	6.935	7.446
6.933	6.942	7.472
6.951	6.95	7.484
6.951	6.951	7.489
6.958	6.958	7.491
6.958	6.958	7.492
6.958	6.958	7.507
6.958	6.958	7.507
6.958	6.958	7.507
6.958	6.967	7.507
6.958	6.977	7.507
6.958	6.979	7.507
6.958	6.981	7.507
6.958	6.985	7.507
6.958	6.985	7.536
6.958	6.987	7.536
6.958	6.998	7.563
6.965	7.006	7.568
6.97	7.014	7.568
6.983	7.019	7.568
7.011	7.019	7.568
7.019	7.019	7.568
7.019	7.019	7.568
7.019	7.019	7.568
7.019	7.019	7.627
7.019	7.019	7.629
7.019	7.019	7.629
7.019	7.019	7.629
7.019	7.019	7.629
7.019	7.019	7.629
7.019	7.021	7.629
7.019	7.025	7.629
7.019	7.027	7.629
7.022	7.028	7.629
7.023	7.031	7.629
7.035	7.041	7.645
7.039	7.047	7.668
7.042	7.05	7.671
7.044	7.052	7.69
7.048	7.058	7.69
7.054	7.06	7.69
7.068	7.077	7.71
7.08	7.08	7.729
7.08	7.08	7.731
7.08	7.08	7.751
7.08	7.08	7.751
7.08	7.08	7.751
7.085	7.08	7.751
7.087	7.08	7.751
7.088	7.08	7.751
7.09	7.08	7.751
7.096	7.08	7.751
7.123	7.08	7.803
7.137	7.08	7.813
7.141	7.08	7.813
7.141	7.086	7.813
7.141	7.09	7.813
7.141	7.093	7.813
7.141	7.1	7.813
7.141	7.106	7.813
7.141	7.124	7.813
7.141	7.124	7.813
7.141	7.127	7.813
7.141	7.128	7.813
7.141	7.13	7.813
7.141	7.132	7.853
7.141	7.135	7.853
7.141	7.141	7.874
7.166	7.141	7.874
7.175	7.141	7.874
7.179	7.141	7.874
7.183	7.141	7.874
7.201	7.141	7.874
7.202	7.141	7.874
7.202	7.141	7.874
7.202	7.141	7.902
7.202	7.147	7.934
7.202	7.153	7.935
7.202	7.166	7.935
7.202	7.171	7.935
7.202	7.187	7.935
7.202	7.193	7.935
7.202	7.196	7.935
7.202	7.202	7.935
7.202	7.202	7.935
7.202	7.202	7.935
7.202	7.202	7.935
7.24	7.202	7.962
7.249	7.202	7.996
7.263	7.202	7.996
7.263	7.203	7.996
7.263	7.213	7.996
7.263	7.213	7.996
7.263	7.228	7.996
7.263	7.236	7.996
7.263	7.238	7.996
7.263	7.238	8.014
7.263	7.243	8.038
7.273	7.245	8.051
7.278	7.248	8.053
7.324	7.259	8.057
7.324	7.263	8.057
7.324	7.263	8.057
7.324	7.263	8.057
7.324	7.263	8.057
7.324	7.263	8.057
7.324	7.263	8.062
7.324	7.263	8.082
7.324	7.263	8.096
7.324	7.263	8.111
7.331	7.263	8.118
7.333	7.263	8.118
7.335	7.263	8.118
7.337	7.263	8.118
7.352	7.263	8.118
7.356	7.263	8.118
7.358	7.27	8.118
7.367	7.271	8.118
7.371	7.272	8.118
7.373	7.273	8.118
7.379	7.274	8.118
7.385	7.276	8.118
7.385	7.287	8.118
7.385	7.293	8.143
7.385	7.296	8.157
7.385	7.302	8.179
7.385	7.303	8.179
7.385	7.304	8.179
7.385	7.308	8.179
7.385	7.324	8.179
7.385	7.324	8.179
7.414	7.324	8.179
7.422	7.324	8.179
7.427	7.324	8.194
7.436	7.324	8.233
7.442	7.326	8.24
7.443	7.328	8.24
7.446	7.332	8.24
7.446	7.335	8.24
7.446	7.344	8.24
7.446	7.352	8.24
7.446	7.353	8.248
7.446	7.353	8.259
7.446	7.355	8.301
7.446	7.366	8.301
7.446	7.374	8.301
7.446	7.377	8.301
7.446	7.385	8.301
7.446	7.385	8.301
7.446	7.385	8.301
7.457	7.385	8.301
7.471	7.385	8.301
7.484	7.385	8.301
7.485	7.385	8.301
7.486	7.385	8.314
7.495	7.394	8.362
7.507	7.402	8.362
7.507	7.407	8.362
7.507	7.407	8.362
7.507	7.408	8.362
7.507	7.419	8.362
7.507	7.419	8.362
7.507	7.446	8.362
7.507	7.446	8.367
7.507	7.446	8.38
7.507	7.446	8.41
7.507	7.446	8.415
7.507	7.446	8.423
7.507	7.446	8.423
7.507	7.446	8.423
7.512	7.446	8.423
7.531	7.457	8.423
7.537	7.473	8.423
7.54	7.476	8.423
7.544	7.48	8.423
7.544	7.484	8.423
7.559	7.497	8.423
7.565	7.5	8.484
7.567	7.507	8.484
7.568	7.507	8.484
7.568	7.507	8.484
7.568	7.507	8.484
7.568	7.507	8.484
7.568	7.507	8.484
7.568	7.507	8.484
7.568	7.507	8.484
7.568	7.507	8.484
7.568	7.507	8.486
7.568	7.52	8.513
7.568	7.524	8.523
7.568	7.529	8.531
7.568	7.532	8.533
7.568	7.532	8.545
7.568	7.533	8.545
7.57	7.538	8.545
7.571	7.539	8.545
7.575	7.546	8.545
7.575	7.554	8.545
7.594	7.556	8.545
7.596	7.562	8.545
7.609	7.568	8.545
7.614	7.568	8.559
7.629	7.568	8.578
7.629	7.568	8.583
7.629	7.568	8.605
7.629	7.568	8.606
7.629	7.568	8.606
7.629	7.568	8.606
7.629	7.568	8.606
7.629	7.568	8.606
7.635	7.568	8.606
7.646	7.568	8.606
7.647	7.568	8.606
7.659	7.571	8.632
7.66	7.574	8.667
7.662	7.575	8.667
7.677	7.597	8.667
7.678	7.601	8.667
7.68	7.607	8.667
7.69	7.611	8.667
7.69	7.617	8.667
7.69	7.621	8.667
7.69	7.629	8.667
7.69	7.629	8.673
7.69	7.629	8.697
7.69	7.629	8.701
7.69	7.629	8.726
7.69	7.629	8.728
7.69	7.629	8.728
7.69	7.629	8.728
7.717	7.629	8.728
7.729	7.631	8.728
7.748	7.634	8.728
7.751	7.643	8.728
7.751	7.653	8.728
7.751	7.66	8.728
7.751	7.662	8.728
7.751	7.662	8.735
7.751	7.675	8.758
7.751	7.683	8.772
7.751	7.69	8.789
7.751	7.69	8.789
7.751	7.69	8.789
7.751	7.69	8.789
7.751	7.69	8.789
7.752	7.69	8.789
7.771	7.69	8.789
7.772	7.69	8.789
7.783	7.69	8.789
7.798	7.69	8.804
7.803	7.69	8.85
7.805	7.698	8.85
7.811	7.707	8.85
7.813	7.713	8.85
7.813	7.715	8.85
7.813	7.716	8.85
7.813	7.72	8.85
7.813	7.725	8.85
7.813	7.732	8.85
7.828	7.737	8.85
7.83	7.75	8.85
7.845	7.751	8.85
7.847	7.751	8.85
7.853	7.751	8.884
7.856	7.751	8.911
7.864	7.751	8.911
7.867	7.751	8.911
7.874	7.751	8.911
7.874	7.751	8.911
7.874	7.751	8.911
7.874	7.753	8.927
7.874	7.758	8.972
7.874	7.76	8.972
7.874	7.769	8.972
7.89	7.769	8.972
7.895	7.775	8.972
7.916	7.783	9.033
7.929	7.787	9.033
7.935	7.795	9.033
7.935	7.81	9.033
7.935	7.813	9.033
7.935	7.813	9.033
7.935	7.813	9.033
7.935	7.813	9.033
7.935	7.813	9.033
7.935	7.813	9.049
7.935	7.813	9.065
7.935	7.813	9.074
7.935	7.813	9.087
7.937	7.813	9.094
7.942	7.813	9.094
7.959	7.819	9.094
7.97	7.829	9.094
7.977	7.834	9.094
7.99	7.848	9.1
7.991	7.86	9.128
7.996	7.861	9.155
7.996	7.861	9.155
7.996	7.861	9.155
7.996	7.874	9.155
7.996	7.874	9.155
7.996	7.874	9.155
7.996	7.874	9.155
7.996	7.874	9.155
7.996	7.874	9.175
7.996	7.874	9.186
8.007	7.874	9.212
8.008	7.874	9.216
8.011	7.874	9.216
8.022	7.874	9.216
8.024	7.893	9.216
8.052	7.896	9.217
8.057	7.897	9.218
8.057	7.906	9.219
8.057	7.917	9.258
8.057	7.919	9.274
8.057	7.923	9.277
8.057	7.935	9.277
8.057	7.935	9.277
8.057	7.935	9.277
8.057	7.935	9.277
8.057	7.935	9.277
8.057	7.935	9.277
8.057	7.94	9.277
8.057	7.94	9.277
8.057	7.948	9.277
8.064	7.959	9.316
8.066	7.96	9.337
8.081	7.96	9.338
8.104	7.963	9.338
8.107	7.968	9.338
8.112	7.972	9.338
8.114	7.996	9.374
8.118	7.996	9.389
8.118	7.996	9.399
8.118	7.996	9.399
8.118	7.996	9.399
8.118	7.996	9.399
8.123	7.996	9.399
8.125	7.996	9.399
8.137	7.996	9.442
8.153	7.996	9.45
8.155	7.999	9.46
8.179	8.002	9.46
8.179	8.011	9.46
8.179	8.022	9.461
8.179	8.035	9.47
8.179	8.036	9.475
8.179	8.044	9.493
8.179	8.046	9.521
8.179	8.057	9.521
8.179	8.057	9.521
8.179	8.057	9.521
8.179	8.057	9.521
8.179	8.057	9.521
8.179	8.057	9.521
8.179	8.057	9.521
8.179	8.057	9.561
8.179	8.057	9.562
8.179	8.057	9.57
8.181	8.057	9.583
8.205	8.057	9.583
8.226	8.061	9.583
8.228	8.062	9.583
8.229	8.064	9.583
8.24	8.076	9.611
8.24	8.095	9.615
8.24	8.099	9.644
8.24	8.118	9.644
8.24	8.118	9.644
8.24	8.118	9.681
8.24	8.118	9.698
8.252	8.118	9.705
8.269	8.118	9.705
8.272	8.118	9.705
8.276	8.118	9.705
8.276	8.118	9.705
8.284	8.118	9.705
8.288	8.118	9.705
8.293	8.118	9.705
8.297	8.126	9.705
8.298	8.127	9.705
8.3	8.143	9.705
8.301	8.144	9.705
8.301	8.152	9.708
8.301	8.155	9.718
8.301	8.159	9.718
8.301	8.169	9.728
8.301	8.179	9.737
8.301	8.179	9.75
8.301	8.179	9.766
8.301	8.179	9.766
8.301	8.179	9.766
8.301	8.179	9.766
8.301	8.179	9.766
8.301	8.179	9.766
8.304	8.179	9.766
8.305	8.179	9.766
8.317	8.179	9.766
8.32	8.179	9.789
8.325	8.179	9.808
8.329	8.179	9.827
8.329	8.179	9.827
8.332	8.179	9.827
8.35	8.179	9.827
8.36	8.179	9.827
8.362	8.179	9.827
8.362	8.183	9.827
8.362	8.183	9.827
8.362	8.19	9.827
8.362	8.19	9.827
8.362	8.205	9.827
8.362	8.206	9.84
8.362	8.209	9.843
8.362	8.211	9.858
8.362	8.226	9.875
8.362	8.233	9.888
8.362	8.24	9.888
8.362	8.24	9.888
8.362	8.24	9.888
8.362	8.24	9.906
8.362	8.24	9.925
8.363	8.24	9.933
8.375	8.24	9.943
8.393	8.24	9.949
8.399	8.24	9.949
8.418	8.24	9.949
8.423	8.24	9.949
8.423	8.24	9.949
8.423	8.24	9.949
8.423	8.252	9.949
8.423	8.258	9.949
8.423	8.262	9.949
8.423	8.269	9.986
8.423	8.282	10.007
8.423	8.287	10.01
8.423	8.296	10.01
8.423	8.301	10.01
8.423	8.301	10.01
8.423	8.301	10.01
8.423	8.301	10.01
8.423	8.301	10.01
8.423	8.301	10.01
8.428	8.301	10.01
8.428	8.301	10.01
8.432	8.301	10.01
8.441	8.301	10.01
8.442	8.301	10.067
8.46	8.308	10.071
8.465	8.314	10.071
8.465	8.317	10.071
8.484	8.32	10.085
8.484	8.32	10.101
8.484	8.323	10.105
8.484	8.325	10.111
8.484	8.328	10.115
8.484	8.328	10.116
8.487	8.334	10.123
8.489	8.336	10.125
8.489	8.342	10.132
8.522	8.348	10.132
8.529	8.348	10.132
8.533	8.355	10.132
8.539	8.356	10.132
8.544	8.359	10.132
8.545	8.362	10.132
8.545	8.362	10.132
8.545	8.362	10.144
8.545	8.362	10.15
8.545	8.362	10.157
8.545	8.362	10.193
8.545	8.362	10.193
8.545	8.362	10.193
8.545	8.362	10.193
8.545	8.362	10.193
8.545	8.366	10.193
8.553	8.369	10.193
8.571	8.392	10.193
8.572	8.395	10.193
8.588	8.398	10.216
8.593	8.401	10.253
8.598	8.404	10.254
8.604	8.405	10.254
8.606	8.405	10.254
8.606	8.423	10.254
8.606	8.423	10.254
8.606	8.423	10.254
8.606	8.423	10.254
8.606	8.423	10.26
8.606	8.423	10.271
8.606	8.423	10.291
8.606	8.423	10.306
8.606	8.423	10.309
8.606	8.423	10.315
8.606	8.423	10.315
8.607	8.423	10.315
8.618	8.423	10.315
8.631	8.423	10.315
8.647	8.423	10.315
8.664	8.423	10.315
8.667	8.423	10.315
8.667	8.423	10.315
8.667	8.423	10.315
8.667	8.423	10.315
8.667	8.43	10.315
8.667	8.436	10.315
8.667	8.446	10.315
8.667	8.453	10.332
8.667	8.462	10.348
8.667	8.464	10.376
8.667	8.47	10.376
8.667	8.481	10.376
8.667	8.484	10.376
8.674	8.484	10.376
8.687	8.484	10.376
8.704	8.484	10.376
8.722	8.484	10.428
8.728	8.484	10.437
8.728	8.484	10.437
8.728	8.484	10.437
8.728	8.484	10.437
8.728	8.484	10.455
8.728	8.484	10.459
8.728	8.484	10.463
8.728	8.484	10.469
8.728	8.486	10.476
8.728	8.487	10.498
8.728	8.491	10.498
8.728	8.497	10.498
8.729	8.514	10.498
8.735	8.516	10.498
8.736	8.529	10.498
8.744	8.534	10.498
8.763	8.536	10.541
8.769	8.545	10.549
8.78	8.545	10.559
8.786	8.545	10.559
8.789	8.545	10.559
8.789	8.545	10.559
8.789	8.545	10.559
8.789	8.545	10.559
8.789	8.545	10.559
8.789	8.545	10.559
8.789	8.545	10.559
8.789	8.545	10.604
8.789	8.547	10.62
8.789	8.549	10.62
8.789	8.571	10.62
8.789	8.592	10.62
8.789	8.594	10.62
8.794	8.606	10.62
8.808	8.606	10.62
8.809	8.606	10.62
8.811	8.606	10.62
8.837	8.606	10.62
8.842	8.606	10.67
8.846	8.606	10.674
8.85	8.606	10.678
8.85	8.606	10.681
8.85	8.606	10.681
8.85	8.606	10.681
8.85	8.606	10.681
8.85	8.606	10.681
8.85	8.606	10.681
8.85	8.606	10.709
8.85	8.606	10.725
8.85	8.606	10.742
8.85	8.606	10.742
8.85	8.607	10.742
8.857	8.618	10.742
8.858	8.619	10.742
8.859	8.626	10.751
8.86	8.626	10.755
8.863	8.64	10.763
8.869	8.643	10.769
8.87	8.645	10.803
8.902	8.667	10.803
8.911	8.667	10.803
8.911	8.667	10.803
8.911	8.667	10.803
8.911	8.667	10.81
8.911	8.667	10.864
8.911	8.667	10.864
8.911	8.667	10.864
8.911	8.667	10.864
8.911	8.667	10.864
8.919	8.667	10.864
8.936	8.681	10.864
8.94	8.692	10.867
8.967	8.698	10.877
8.968	8.717	10.88
8.972	8.722	10.904
8.972	8.723	10.925
8.972	8.725	10.925
8.972	8.726	10.93
8.972	8.728	10.934
8.972	8.728	10.985
8.972	8.728	10.986
8.972	8.728	10.986
8.972	8.728	10.986
8.972	8.728	10.986
8.972	8.728	10.986
8.972	8.728	10.986
8.972	8.728	11.013
8.972	8.728	11.038
8.972	8.728	11.047
8.972	8.728	11.047
8.972	8.728	11.047
8.982	8.728	11.074
8.988	8.728	11.084
8.993	8.728	11.108
9.033	8.728	11.108
9.033	8.728	11.108
9.033	8.729	11.124
9.033	8.756	11.169
9.033	8.774	11.169
9.033	8.785	11.169
9.033	8.787	11.169
9.033	8.789	11.169
9.033	8.789	11.169
9.033	8.789	11.19
9.033	8.789	11.201
9.033	8.789	11.202
9.035	8.789	11.23
9.043	8.789	11.23
9.044	8.789	11.23
9.05	8.789	11.23
9.055	8.789	11.237
9.057	8.789	11.285
9.058	8.789	11.292
9.093	8.789	11.292
9.094	8.789	11.292
9.094	8.791	11.292
9.094	8.801	11.292
9.094	8.802	11.319
9.094	8.808	11.325
9.094	8.816	11.328
9.094	8.818	11.35
9.094	8.822	11.353
9.094	8.824	11.353
9.094	8.825	11.353
9.094	8.826	11.353
9.094	8.832	11.353
9.094	8.844	11.353
9.094	8.849	11.353
9.094	8.85	11.387
9.094	8.85	11.414
9.094	8.85	11.414
9.094	8.85	11.414
9.107	8.85	11.414
9.112	8.85	11.414
9.118	8.85	11.416
9.146	8.85	11.47
9.155	8.85	11.475
9.155	8.85	11.475
9.155	8.855	11.475
9.155	8.866	11.475
9.155	8.871	11.475
9.155	8.875	11.475
9.155	8.882	11.523
9.155	8.887	11.536
9.155	8.887	11.536
9.155	8.894	11.536
9.155	8.897	11.536
9.155	8.899	11.536
9.155	8.906	11.536
9.155	8.911	11.536
9.155	8.911	11.536
9.155	8.911	11.548
9.157	8.911	11.592
9.161	8.911	11.597
9.17	8.911	11.598
9.176	8.916	11.658
9.18	8.918	11.658
9.182	8.92	11.658
9.194	8.929	11.658
9.216	8.953	11.658
9.216	8.961	11.662
9.216	8.962	11.712
9.216	8.967	11.719
9.216	8.967	11.719
9.216	8.972	11.719
9.216	8.972	11.746
9.216	8.972	11.757
9.216	8.972	11.763
9.216	8.972	11.78
9.218	8.972	11.782
9.223	8.972	11.836
9.226	8.972	11.841
9.235	8.972	11.841
9.239	8.972	11.841
9.242	8.972	11.841
9.246	8.972	11.86
9.248	8.972	11.863
9.25	8.975	11.878
9.251	9.022	11.885
9.268	9.025	11.888
9.276	9.033	11.897
9.277	9.033	11.901
9.277	9.033	11.902
9.277	9.033	11.902
9.277	9.033	11.902
9.277	9.033	11.902
9.277	9.033	11.922
9.277	9.033	11.925
9.277	9.033	11.947
9.277	9.033	11.963
9.277	9.033	11.963
9.277	9.033	11.963
9.277	9.033	11.963
9.287	9.033	11.994
9.287	9.033	12.024
9.289	9.033	12.024
9.293	9.047	12.024
9.338	9.054	12.024
9.338	9.054	12.024
9.338	9.058	12.039
9.338	9.064	12.043
9.338	9.073	12.068
9.343	9.076	12.085
9.348	9.077	12.085
9.377	9.082	12.085
9.377	9.091	12.085
9.395	9.094	12.085
9.399	9.094	12.088
9.399	9.094	12.091
9.399	9.094	12.095
9.399	9.094	12.096
9.399	9.094	12.106
9.399	9.094	12.122
9.399	9.094	12.124
9.399	9.094	12.141
9.418	9.094	12.146
9.423	9.094	12.146
9.447	9.094	12.146
9.452	9.094	12.15
9.458	9.094	12.168
9.46	9.108	12.19
9.46	9.117	12.192
9.46	9.117	12.207
9.46	9.13	12.207
9.46	9.13	12.207
9.46	9.135	12.207
9.46	9.138	12.207
9.46	9.143	12.227
9.46	9.153	12.268
9.46	9.155	12.268
9.492	9.155	12.268
9.494	9.155	12.268
9.502	9.155	12.268
9.521	9.155	12.268
9.521	9.155	12.268
9.521	9.155	12.329
9.521	9.155	12.329
9.521	9.155	12.329
9.521	9.155	12.329
9.521	9.166	12.329
9.521	9.169	12.329
9.521	9.169	12.329
9.523	9.172	12.329
9.536	9.173	12.335
9.542	9.174	12.361
9.557	9.176	12.361
9.567	9.184	12.38
9.583	9.184	12.385
9.583	9.192	12.39
9.583	9.193	12.39
9.583	9.195	12.39
9.583	9.206	12.39
9.583	9.207	12.395
9.583	9.214	12.4
9.583	9.216	12.403
9.583	9.216	12.451
9.583	9.216	12.451
9.583	9.216	12.451
9.583	9.216	12.451
9.594	9.216	12.451
9.6	9.216	12.465
9.606	9.216	12.491
9.622	9.216	12.497
9.644	9.216	12.512
9.644	9.216	12.512
9.644	9.216	12.512
9.644	9.216	12.512
9.644	9.216	12.512
9.644	9.217	12.564
9.644	9.223	12.564
9.644	9.231	12.573
9.645	9.235	12.573
9.682	9.253	12.573
9.695	9.266	12.593
9.702	9.269	12.634
9.705	9.273	12.634
9.705	9.276	12.634
9.705	9.277	12.634
9.705	9.277	12.634
9.705	9.277	12.652
9.705	9.277	12.695
9.705	9.277	12.695
9.705	9.277	12.695
9.705	9.277	12.695
9.705	9.277	12.695
9.705	9.277	12.695
9.705	9.282	12.715
9.705	9.286	12.724
9.705	9.286	12.756
9.706	9.288	12.756
9.741	9.313	12.756
9.746	9.324	12.756
9.747	9.328	12.756
9.747	9.333	12.762
9.749	9.338	12.81
9.75	9.338	12.81
9.761	9.338	12.811
9.766	9.338	12.817
9.766	9.338	12.817
9.766	9.338	12.817
9.766	9.338	12.817
9.766	9.338	12.817
9.774	9.338	12.817
9.793	9.338	12.817
9.803	9.338	12.857
9.809	9.338	12.874
9.827	9.338	12.876
9.827	9.338	12.878
9.827	9.338	12.878
9.827	9.338	12.878
9.827	9.348	12.886
9.827	9.36	12.976
9.827	9.364	12.986
9.827	9.368	13
9.827	9.368	13
9.827	9.369	13
9.827	9.382	13
9.827	9.384	13.01
9.827	9.386	13.028
9.827	9.387	13.051
9.827	9.399	13.06
9.827	9.399	13.065
9.827	9.399	13.109
9.835	9.399	13.118
9.867	9.399	13.123
9.881	9.399	13.123
9.885	9.399	13.123
9.888	9.399	13.123
9.888	9.399	13.123
9.888	9.399	13.16
9.888	9.399	13.184
9.888	9.399	13.184
9.888	9.428	13.226
9.888	9.438	13.242
9.888	9.442	13.245
9.888	9.445	13.245
9.888	9.46	13.245
9.93	9.46	13.245
9.946	9.46	13.245
9.949	9.46	13.245
9.949	9.46	13.245
9.949	9.46	13.251
9.949	9.46	13.259
9.949	9.46	13.27
9.949	9.46	13.306
9.949	9.46	13.306
9.949	9.46	13.306
9.949	9.46	13.319
9.949	9.46	13.343
9.95	9.463	13.359
9.994	9.463	13.366
9.996	9.474	13.367
10.01	9.486	13.367
10.01	9.487	13.369
10.01	9.49	13.392
10.01	9.504	13.413
10.01	9.515	13.427
10.01	9.517	13.428
10.01	9.521	13.428
10.01	9.521	13.428
10.01	9.521	13.428
10.01	9.521	13.453
10.01	9.521	13.465
10.01	9.521	13.489
10.011	9.521	13.489
10.015	9.521	13.489
10.026	9.521	13.489
10.032	9.521	13.521
10.04	9.521	13.55
10.043	9.521	13.559
10.051	9.521	13.597
10.071	9.521	13.611
10.071	9.525	13.611
10.071	9.541	13.612
10.071	9.542	13.614
10.071	9.542	13.616
10.071	9.544	13.633
10.071	9.544	13.649
10.079	9.548	13.659
10.083	9.553	13.672
10.084	9.56	13.672
10.101	9.566	13.672
10.108	9.566	13.701
10.11	9.569	13.714
10.118	9.57	13.725
10.132	9.575	13.733
10.132	9.583	13.733
10.132	9.583	13.783
10.132	9.583	13.794
10.132	9.583	13.794
10.132	9.583	13.794
10.132	9.59	13.794
10.132	9.593	13.803
10.132	9.6	13.807
10.132	9.605	13.845
10.132	9.608	13.855
10.132	9.615	13.855
10.132	9.619	13.855
10.133	9.632	13.916
10.136	9.642	13.916
10.139	9.644	13.916
10.151	9.644	13.916
10.152	9.644	13.916
10.171	9.644	13.916
10.175	9.644	13.916
10.193	9.644	13.977
10.193	9.644	13.977
10.193	9.644	13.977
10.193	9.644	13.977
10.193	9.644	13.977
10.193	9.644	13.977
10.245	9.644	14.031
10.249	9.644	14.034
10.252	9.644	14.038
10.254	9.656	14.038
10.254	9.663	14.038
10.254	9.669	14.038
10.254	9.671	14.074
10.254	9.683	14.099
10.254	9.686	14.099
10.27	9.689	14.099
10.276	9.691	14.099
10.286	9.696	14.099
10.315	9.697	14.099
10.315	9.7	14.13
10.315	9.705	14.16
10.315	9.705	14.191
10.315	9.705	14.221
10.315	9.705	14.221
10.315	9.705	14.221
10.315	9.705	14.221
10.315	9.705	14.221
10.328	9.705	14.221
10.333	9.705	14.221
10.376	9.705	14.221
10.376	9.705	14.221
10.376	9.705	14.221
10.376	9.709	14.234
10.376	9.727	14.282
10.376	9.734	14.282
10.376	9.746	14.307
10.376	9.75	14.335
10.376	9.75	14.337
10.377	9.756	14.343
10.384	9.76	14.343
10.391	9.763	14.345
10.418	9.766	14.363
10.424	9.766	14.404
10.429	9.766	14.404
10.437	9.766	14.406
10.437	9.766	14.465
10.437	9.766	14.465
10.437	9.766	14.465
10.437	9.766	14.512
10.437	9.766	14.52
10.437	9.766	14.526
10.437	9.766	14.526
10.437	9.766	14.526
10.437	9.77	14.587
10.437	9.78	14.587
10.44	9.79	14.587
10.455	9.799	14.635
10.457	9.811	14.648
10.466	9.821	14.709
10.498	9.827	14.709
10.498	9.827	14.709
10.498	9.827	14.771
10.498	9.827	14.771
10.498	9.827	14.771
10.498	9.827	14.781
10.498	9.827	14.782
10.498	9.852	14.893
10.498	9.858	14.893
10.498	9.872	14.893
10.498	9.874	14.893
10.498	9.883	14.913
10.498	9.885	14.939
10.498	9.888	14.954
10.534	9.888	14.954
10.538	9.888	14.963
10.549	9.888	14.966
10.559	9.888	15.01
10.559	9.888	15.013
10.559	9.888	15.015
10.559	9.888	15.015
10.559	9.889	15.015
10.559	9.889	15.05
10.559	9.895	15.076
10.559	9.899	15.076
10.559	9.901	15.076
10.559	9.905	15.108
10.559	9.907	15.137
10.559	9.914	15.137
10.559	9.924	15.137
10.561	9.924	15.137
10.568	9.937	15.198
10.608	9.949	15.198
10.611	9.949	15.198
10.618	9.949	15.198
10.62	9.949	15.246
10.62	9.949	15.259
10.62	9.949	15.32
10.62	9.949	15.32
10.62	9.949	15.32
10.62	9.949	15.32
10.62	9.949	15.326
10.623	9.96	15.381
10.651	9.961	15.381
10.681	9.962	15.381
10.681	9.973	15.381
10.681	9.985	15.407
10.681	9.987	15.429
10.681	9.992	15.442
10.681	9.992	15.442
10.681	9.998	15.442
10.681	10.005	15.442
10.681	10.005	15.454
10.722	10.01	15.462
10.729	10.01	15.492
10.735	10.01	15.499
10.742	10.01	15.503
10.742	10.01	15.503
10.742	10.01	15.503
10.747	10.01	15.503
10.748	10.01	15.526
10.759	10.01	15.564
10.774	10.01	15.564
10.79	10.01	15.596
10.801	10.01	15.61
10.803	10.01	15.625
10.803	10.01	15.686
10.803	10.01	15.693
10.803	10.01	15.747
10.803	10.011	15.747
10.803	10.018	15.747
10.803	10.019	15.747
10.803	10.046	15.747
10.803	10.063	15.792
10.803	10.071	15.797
10.812	10.071	15.808
10.821	10.071	15.808
10.827	10.071	15.808
10.833	10.071	15.844
10.835	10.071	15.869
10.836	10.071	15.869
10.84	10.071	15.869
10.86	10.071	15.869
10.864	10.071	15.878
10.864	10.071	15.93
10.864	10.071	15.991
10.864	10.071	15.991
10.864	10.076	15.991
10.864	10.078	15.991
10.864	10.079	16.052
10.864	10.082	16.052
10.891	10.087	16.087
10.9	10.089	16.109
10.91	10.092	16.113
10.916	10.095	16.113
10.925	10.098	16.117
10.925	10.107	16.158
10.925	10.115	16.174
10.925	10.116	16.174
10.956	10.119	16.174
10.986	10.119	16.218
10.986	10.129	16.235
10.986	10.132	16.245
10.986	10.132	16.296
10.986	10.132	16.296
10.986	10.132	16.296
10.986	10.132	16.304
10.992	10.132	16.328
11.018	10.132	16.357
11.019	10.132	16.357
11.034	10.132	16.357
11.038	10.132	16.357
11.047	10.142	16.387
11.047	10.154	16.418
11.047	10.162	16.418
11.047	10.17	16.453
11.047	10.174	16.471
11.047	10.176	16.479
11.047	10.179	16.479
11.047	10.193	16.49
11.047	10.193	16.541
11.047	10.193	16.541
11.047	10.193	16.541
11.05	10.193	16.541
11.055	10.193	16.541
11.075	10.193	16.602
11.075	10.193	16.602
11.085	10.193	16.602
11.105	10.193	16.663
11.108	10.193	16.724
11.108	10.194	16.724
11.108	10.195	16.783
11.108	10.196	16.785
11.114	10.203	16.785
11.144	10.218	16.785
11.153	10.22	16.79
11.161	10.225	16.801
11.162	10.227	16.838
11.169	10.228	16.846
11.169	10.233	16.846
11.169	10.233	16.846
11.169	10.234	16.907
11.169	10.235	16.907
11.169	10.242	16.907
11.169	10.254	16.907
11.169	10.254	16.907
11.169	10.254	16.934
11.169	10.254	16.947
11.169	10.254	16.968
11.178	10.254	16.968
11.207	10.254	16.968
11.209	10.254	17.017
11.211	10.276	17.029
11.22	10.282	17.029
11.23	10.292	17.043
11.23	10.292	17.09
11.23	10.298	17.128
11.23	10.31	17.166
11.23	10.311	17.259
11.23	10.315	17.273
11.23	10.315	17.273
11.23	10.315	17.278
11.23	10.315	17.313
11.23	10.315	17.334
11.243	10.315	17.395
11.254	10.315	17.395
11.266	10.315	17.395
11.271	10.315	17.406
11.279	10.328	17.456
11.292	10.33	17.456
11.292	10.333	17.456
11.292	10.34	17.492
11.292	10.357	17.517
11.292	10.359	17.517
11.292	10.376	17.517
11.321	10.376	17.526
11.328	10.376	17.639
11.341	10.376	17.639
11.346	10.376	17.639
11.353	10.376	17.7
11.353	10.376	17.721
11.353	10.376	17.761
11.353	10.376	17.822
11.353	10.376	17.883
11.366	10.376	17.883
11.367	10.376	17.883
11.375	10.376	18.005
11.397	10.376	18.066
11.409	10.378	18.127
11.414	10.382	18.188
11.414	10.389	18.188
11.414	10.391	18.25
11.414	10.394	18.311
11.414	10.395	18.395
11.428	10.398	18.42
11.447	10.404	18.433
11.467	10.405	18.494
11.471	10.419	18.509
11.475	10.426	18.555
11.475	10.437	18.555
11.475	10.437	18.605
11.475	10.437	18.616
11.475	10.437	18.738
11.475	10.437	18.792
11.475	10.437	18.799
11.475	10.446	18.799
11.475	10.449	18.86
11.499	10.45	18.86
11.536	10.451	18.91
11.536	10.455	18.921
11.536	10.463	18.923
11.546	10.463	18.967
11.586	10.465	18.982
11.597	10.472	18.989
11.597	10.49	19.043
11.597	10.492	19.062
11.597	10.495	19.104
11.597	10.498	19.104
11.597	10.498	19.116
11.597	10.498	19.152
11.61	10.498	19.219
11.628	10.507	19.226
11.633	10.507	19.226
11.646	10.509	19.226
11.658	10.512	19.226
11.658	10.512	19.289
11.658	10.516	19.306
11.658	10.519	19.348
11.658	10.531	19.348
11.658	10.534	19.409
11.658	10.535	19.409
11.658	10.536	19.475
11.658	10.538	19.531
11.658	10.546	19.592
11.677	10.559	19.592
11.691	10.559	19.653
11.696	10.559	19.653
11.719	10.559	19.653
11.719	10.559	19.687
11.719	10.559	19.714
11.719	10.559	19.714
11.719	10.559	19.784
11.719	10.559	19.836
11.719	10.559	19.897
11.719	10.559	19.897
11.719	10.559	19.897
11.719	10.559	19.973
11.751	10.559	19.996
11.754	10.56	20.076
11.756	10.58	20.142
11.765	10.582	20.142
11.767	10.584	20.203
11.78	10.585	20.203
11.78	10.589	20.264
11.78	10.599	20.264
11.78	10.62	20.325
11.78	10.62	20.353
11.78	10.62	20.447
11.78	10.62	20.508
11.78	10.62	20.569
11.78	10.62	20.575
11.836	10.62	20.623
11.841	10.62	20.741
11.841	10.62	20.809
11.841	10.62	20.813
11.841	10.62	20.813
11.843	10.62	20.813
11.858	10.62	20.935
11.858	10.62	20.935
11.86	10.62	20.973
11.902	10.624	20.987
11.902	10.63	20.996
11.902	10.635	20.996
11.902	10.639	20.996
11.902	10.642	21.057
11.902	10.651	21.057
11.902	10.653	21.062
11.902	10.654	21.07
11.902	10.658	21.109
11.902	10.662	21.118
11.902	10.681	21.118
11.953	10.681	21.118
11.955	10.681	21.138
11.961	10.681	21.165
11.963	10.681	21.179
11.963	10.681	21.186
11.963	10.681	21.238
11.963	10.681	21.301
11.963	10.681	21.362
11.963	10.681	21.362
11.965	10.681	21.417
11.967	10.681	21.484
11.97	10.682	21.729
11.988	10.687	21.734
12.021	10.689	21.74
12.024	10.691	21.865
12.024	10.712	21.973
12.024	10.715	21.973
12.024	10.715	21.973
12.028	10.729	21.973
12.045	10.732	22.145
12.048	10.734	22.156
12.056	10.742	22.217
12.085	10.742	22.333
12.085	10.742	22.339
12.085	10.742	22.455
12.085	10.742	22.554
12.085	10.742	22.583
12.088	10.748	22.648
12.146	10.751	22.665
12.146	10.756	22.705
12.146	10.763	22.766
12.146	10.774	22.766
12.156	10.777	22.827
12.164	10.778	22.868
12.183	10.782	22.888
12.2	10.784	23.376
12.207	10.794	23.376
12.207	10.796	23.429
12.207	10.798	23.499
12.207	10.803	23.499
12.207	10.803	23.515
12.207	10.803	23.56
12.207	10.81	23.56
12.21	10.812	23.56
12.223	10.827	23.56
12.231	10.828	23.621
12.235	10.838	23.682
12.242	10.841	23.805
12.243	10.841	23.865
12.266	10.843	23.96
12.268	10.85	23.987
12.268	10.855	24.048
12.268	10.864	24.109
12.268	10.864	24.109
12.268	10.864	24.135
12.268	10.864	24.149
12.268	10.864	24.17
12.288	10.866	24.346
12.297	10.876	24.531
12.311	10.88	24.536
12.315	10.885	24.536
12.327	10.904	24.536
12.329	10.921	24.609
12.329	10.923	24.841
12.329	10.925	24.855
12.329	10.925	24.927
12.329	10.925	24.987
12.329	10.925	25.024
12.337	10.925	25.33
12.356	10.925	25.374
12.39	10.925	25.574
12.39	10.936	25.635
12.39	10.94	25.757
12.39	10.947	25.818
12.39	10.961	25.818
12.39	10.963	25.818
12.39	10.965	25.818
12.39	10.971	25.818
12.39	10.986	25.94
12.391	10.986	26.062
12.401	10.986	26.132
12.427	10.986	26.184
12.451	10.986	26.306
12.451	10.986	26.306
12.451	10.986	26.428
12.466	10.986	26.428
12.508	10.986	26.486
12.512	10.986	26.489
12.512	10.986	26.611
12.512	10.986	26.662
12.512	10.993	26.794
12.542	11.002	26.937
12.557	11.004	26.978
12.573	11.006	27.039
12.573	11.021	27.101
12.58	11.039	27.588
12.634	11.044	27.649
12.634	11.047	27.832
12.634	11.047	27.893
12.634	11.047	27.954
12.646	11.047	28.023
12.658	11.047	28.288
12.695	11.047	28.381
12.695	11.047	28.387
12.695	11.047	28.455
12.695	11.047	28.625
12.695	11.049	28.777
12.695	11.05	28.992
12.695	11.052	29.541
12.716	11.062	29.663
12.724	11.071	29.846
12.738	11.082	29.907
12.749	11.083	30.452
12.756	11.085	30.748
12.756	11.086	30.823
12.756	11.093	30.945
12.756	11.103	31.25
12.756	11.108	31.25
12.761	11.108	31.283
12.777	11.108	31.433
12.785	11.108	31.555
12.796	11.108	31.573
12.8	11.108	31.799
12.817	11.108	32.349
12.817	11.108	32.593
12.817	11.112	33.02
12.817	11.12	33.386
12.817	11.123	33.804
12.824	11.143	34.162
12.828	11.144	34.363
12.878	11.149	34.37
12.878	11.152	34.668
12.878	11.159	34.721
12.878	11.167	34.912
12.878	11.169	36.079
12.886	11.169	36.377
12.928	11.169	36.611
12.929	11.175	37.109
12.939	11.176	37.17
12.939	11.184	37.231
12.944	11.186	37.659
12.997	11.188	37.72
13	11.19	39.612
13	11.192	39.978
13	11.195	40.27
13	11.197	40.894
13	11.209	40.955
13	11.21	41.138
13	11.214	41.321
13.025	11.218	41.809
13.045	11.222	42.297
13.049	11.223	44.018
13.062	11.23	46.753
13.062	11.23	47.18
13.062	11.23	47.852
13.062	11.23	49.549
13.09	11.23	52.069
13.12	11.23	52.551
13.123	11.23	54.565
13.123	11.23	55.481
13.123	11.23	58.431
13.123	11.23	60.791
13.123	11.23	61.003
13.123	11.23	65.613
13.123	11.232	65.918
13.123	11.256	70.098
13.123	11.261	98.816
13.123	11.277
13.126	11.292
13.184	11.292
13.184	11.292
13.184	11.292
13.184	11.292
13.184	11.292
13.187	11.292
13.207	11.292
13.219	11.292
13.245	11.292
13.245	11.297
13.245	11.299
13.283	11.323
13.303	11.335
13.306	11.35
13.306	11.35
13.306	11.351
13.306	11.353
13.306	11.353
13.306	11.353
13.315	11.364
13.316	11.365
13.331	11.365
13.341	11.374
13.416	11.379
13.425	11.387
13.428	11.391
13.428	11.403
13.428	11.403
13.428	11.414
13.428	11.414
13.428	11.414
13.428	11.414
13.489	11.414
13.489	11.416
13.489	11.423
13.489	11.427
13.51	11.432
13.55	11.432
13.55	11.432
13.55	11.433
13.55	11.436
13.611	11.471
13.611	11.475
13.611	11.475
13.611	11.475
13.618	11.475
13.629	11.475
13.657	11.475
13.664	11.475
13.672	11.475
13.672	11.475
13.672	11.519
13.672	11.533
13.733	11.536
13.737	11.536
13.77	11.536
13.794	11.536
13.794	11.536
13.794	11.536
13.806	11.543
13.813	11.56
13.816	11.563
13.832	11.588
13.849	11.59
13.855	11.591
13.855	11.597
13.855	11.597
13.855	11.597
13.855	11.597
13.855	11.597
13.901	11.597
13.916	11.597
13.916	11.597
13.916	11.606
13.947	11.618
13.972	11.631
13.977	11.64
13.977	11.646
13.977	11.658
14.021	11.658
14.038	11.658
14.038	11.658
14.038	11.658
14.047	11.658
14.099	11.658
14.16	11.658
14.16	11.676
14.16	11.679
14.16	11.681
14.179	11.685
14.221	11.709
14.221	11.714
14.221	11.719
14.221	11.719
14.221	11.719
14.221	11.719
14.239	11.719
14.242	11.719
14.248	11.719
14.254	11.719
14.255	11.719
14.282	11.719
14.282	11.72
14.282	11.727
14.282	11.743
14.282	11.748
14.287	11.77
14.303	11.777
14.307	11.78
14.31	11.78
14.313	11.78
14.316	11.78
14.343	11.78
14.343	11.78
14.404	11.78
14.404	11.78
14.404	11.78
14.404	11.785
14.404	11.794
14.409	11.806
14.415	11.808
14.428	11.808
14.465	11.81
14.465	11.833
14.465	11.841
14.465	11.841
14.508	11.841
14.526	11.841
14.545	11.841
14.587	11.841
14.587	11.841
14.631	11.848
14.648	11.849
14.648	11.867
14.648	11.872
14.648	11.879
14.648	11.882
14.648	11.902
14.648	11.902
14.648	11.902
14.662	11.902
14.691	11.904
14.709	11.906
14.709	11.915
14.709	11.932
14.709	11.937
14.732	11.941
14.744	11.955
14.766	11.958
14.77	11.963
14.771	11.963
14.771	11.963
14.771	11.963
14.771	11.963
14.782	11.963
14.813	11.963
14.82	11.963
14.832	11.968
14.832	11.977
14.832	11.978
14.832	11.978
14.869	11.978
14.889	11.979
14.893	11.991
14.893	11.992
14.893	11.992
14.893	12.014
14.908	12.023
14.91	12.023
14.919	12.024
14.948	12.024
14.954	12.024
14.954	12.024
14.954	12.024
14.954	12.024
14.954	12.024
14.958	12.032
14.966	12.033
14.968	12.043
14.986	12.07
15.015	12.082
15.076	12.085
15.137	12.085
15.137	12.085
15.195	12.085
15.198	12.085
15.198	12.085
15.198	12.085
15.198	12.085
15.204	12.085
15.226	12.085
15.239	12.085
15.259	12.086
15.259	12.094
15.259	12.094
15.259	12.096
15.27	12.109
15.273	12.11
15.32	12.129
15.32	12.131
15.338	12.143
15.352	12.145
15.365	12.146
15.381	12.146
15.381	12.146
15.381	12.146
15.381	12.148
15.439	12.148
15.442	12.149
15.442	12.15
15.442	12.152
15.503	12.158
15.503	12.171
15.503	12.177
15.503	12.179
15.511	12.182
15.513	12.182
15.541	12.202
15.564	12.207
15.564	12.207
15.564	12.207
15.625	12.207
15.625	12.207
15.625	12.207
15.625	12.207
15.625	12.207
15.629	12.207
15.645	12.207
15.686	12.207
15.686	12.217
15.686	12.218
15.686	12.233
15.686	12.252
15.686	12.267
15.743	12.268
15.747	12.268
15.771	12.268
15.799	12.268
15.808	12.268
15.808	12.268
15.808	12.268
15.808	12.268
15.808	12.289
15.808	12.308
15.808	12.313
[truncated: 1,220 more rows]

## Sheet: all the interval
Wild-type	HTT-SD	HTT-SA
7.5	6.7	6.6
7.5	7.4	8.1
8.2	7.9	8.3
8.8	8.2	9.6
9	8.2	11.1
9.2	8.8	12.2
9.2	9	12.2
9.3	9.1	12.7
9.7	9.2	13.1
9.8	9.4	13.5
10.3	9.7	13.6
11.2	10.4	13.6
11.3	10.7	13.7
11.6	10.7	14
11.8	10.9	14.2
12.1	11	14.2
12.3	11.1	14.3
12.7	11.1	14.8
13.6	11.1	15
14.1	11.2	15.1
14.1	11.2	15.7
15	11.2	16.7
15.3	11.3	16.8
15.4	11.3	17.4
15.5	11.3	17.7
15.6	11.6	18.1
15.8	11.9	18.5			1 vs. 2	0.1181
15.8	12.1	18.5			1 vs. 3	0.0963
15.9	12.3	18.6			2 vs. 3	0.2017
16.1	12.6	19.2
16.2	12.6	19.4
16.4	12.7	19.4
16.5	12.7	19.5
16.6	13.1	19.6
16.8	13.1	19.7
17.1	13.2	19.7
17.5	13.2	19.9
17.5	13.2	20.3
17.8	13.6	21.1
18	13.7	21.3
18.3	13.8	21.6
18.4	14.2	21.6
18.4	14.3	22.1
18.7	14.4	22.2
18.7	14.4	22.2
18.8	14.5	22.2
19.1	14.6	23.4
19.2	14.6	23.8
19.5	14.8	24
19.5	14.8	24
19.9	15	24.2
19.9	15	24.7
19.9	15.2	25
19.9	15.2	25.5
20	15.3	26.3
20.4	15.4	26.3
20.4	15.6	26.5
20.6	15.6	26.6
20.6	15.6	26.8
20.8	15.8	27.1
20.8	15.8	27.1
21.1	15.8	27.2
22.2	16	27.5
22.2	16.1	27.6
22.2	16.1	28.2
22.3	16.4	28.3
22.5	16.5	28.4
22.7	16.6	28.4
22.8	16.7	28.7
23	16.8	29
23.4	16.9	29.3
23.4	17	30.1
23.5	17	30.4
23.5	17.1	30.8
23.8	17.2	31.1
23.8	17.3	31.5
24.2	17.3	32.3
24.4	17.3	32.4
24.7	17.8	32.4
25.3	17.9	32.9
25.4	18.5	33.4
25.5	18.5	33.7
25.6	18.5	33.9
25.8	18.6	34.1
26.1	19	34.2
26.1	19.1	34.6
26.5	19.1	34.8
26.9	19.2	35.9
27	19.4	36
27.4	19.4	36.5
27.5	19.4	36.8
27.5	19.5	36.9
27.6	19.8	37.3
27.8	19.8	38.2
27.9	19.8	38.3
27.9	19.8	38.6
28	19.9	38.9
28.2	20	39.1
28.2	20.2	39.9
28.2	20.2	40
28.3	20.3	41.9
28.5	20.5	42
28.5	20.5	42.2
28.6	20.6	42.4
29.5	20.6	42.5
30	20.8	42.7
30	20.8	42.8
30	20.9	43
30.2	21.1	43.4
30.2	21.1	43.4
30.6	21.2	43.5
30.7	21.2	43.9
30.8	21.2	44.1
30.8	21.3	44.2
30.9	21.4	44.3
30.9	21.7	44.3
31	21.9	44.3
31.6	22	44.5
31.7	22.1	45
32	22.1	45.8
32.2	22.2	46.4
32.9	22.4	46.8
33	22.5	47
33.2	22.6	47.2
33.7	22.7	47.3
33.8	22.8	47.8
33.9	22.9	48
34	23	48
34.2	23.2	48.9
34.7	23.2	49
34.7	23.3	49.2
34.9	23.3	49.2
35	23.5	49.2
35.3	23.6	50.1
35.6	23.8	50.5
35.7	23.8	50.7
35.7	23.9	51
36.1	23.9	51.1
36.3	23.9	51.1
36.8	24	51.2
36.9	24.1	51.8
36.9	24.1	51.8
37	24.4	52.1
37.1	24.4	52.9
37.2	24.4	53.3
37.5	24.4	53.6
37.5	24.6	54
37.7	24.7	54.1
37.8	24.7	54.2
38.6	24.8	54.7
38.7	24.8	54.7
39.1	24.8	55
39.2	25.2	55.1
39.4	25.4	55.3
39.4	25.5	56.8
39.4	25.7	56.8
39.5	25.8	57
39.6	25.8	57.1
39.7	25.9	57.2
39.8	25.9	57.4
39.8	26.2	58.3
40.1	26.3	58.4
40.3	26.5	58.5
40.4	26.6	58.5
40.4	26.6	58.7
40.5	26.6	59.1
40.5	26.7	59.1
40.5	26.7	59.5
40.5	26.9	59.8
40.5	26.9	62.1
40.6	27	62.7
40.6	27.1	63.7
40.6	27.2	63.7
40.7	27.2	64.1
40.8	27.4	64.5
40.8	27.4	65.2
41.2	27.5	65.6
41.4	27.5	66
41.5	27.6	66.1
42	27.6	66.1
42.2	27.7	66.6
42.2	27.8	66.7
42.2	27.9	67.1
42.3	27.9	67.3
42.5	28.1	67.6
42.9	28.2	67.8
43	28.3	67.8
43.2	28.8	68.4
43.5	28.8	68.7
43.8	28.8	69.1
43.8	28.8	69.9
44	29	70.2
44.1	29.1	70.5
44.4	29.4	70.9
44.6	29.4	71.2
44.7	29.4	71.7
45.1	29.4	71.8
45.1	29.6	71.9
45.3	29.7	72.1
45.6	29.9	72.2
45.6	30	73.1
45.6	30.2	73.7
45.8	30.4	73.7
45.9	30.4	73.8
46.5	30.5	74.1
46.7	30.6	74.6
46.7	30.7	74.6
46.9	30.7	74.7
47	31.1	74.9
47.1	31.2	76.4
47.4	31.4	76.5
47.6	31.5	76.6
47.6	31.5	76.9
47.8	31.7	77
47.9	31.7	77.2
48.2	32.1	77.4
48.4	32.2	77.6
48.4	32.3	77.9
48.5	32.4	78
48.6	32.7	78.3
48.7	32.7	79.2
48.9	32.8	79.9
49.2	32.9	80
49.5	32.9	80
49.5	33	80.2
49.9	33	80.2
50.6	33.1	81.5
50.6	33.2	82
50.7	33.3	82.1
50.8	33.4	82.1
50.8	33.4	83.1
50.9	33.6	83.1
50.9	33.8	83.3
51	33.9	83.4
51	34	83.5
51.1	34	83.6
51.8	34.1	84.2
51.8	34.1	84.6
52.1	34.4	85.1
52.1	34.5	85.1
52.3	34.5	85.4
52.7	34.5	85.8
52.8	34.7	86.4
52.8	34.9	86.6
53	35	87
53.2	35	87
53.3	35.1	87.4
53.5	35.2	87.6
53.5	35.2	88
53.6	35.4	88.2
53.7	35.5	88.9
53.8	35.8	89.1
53.9	36.1	89.3
53.9	36.1	90.2
53.9	36.4	91
54	36.8	91.2
54.4	37.1	91.2
54.5	37.4	91.4
55.2	37.4	92.1
55.2	37.5	92.3
55.2	37.5	92.8
55.6	37.6	92.9
55.6	37.6	93.3
55.7	37.8	93.8
55.8	37.9	93.8
56.1	37.9	93.9
56.2	38.1	94
56.3	38.2	94.3
56.5	38.3	94.5
56.9	38.3	94.9
57.1	38.4	95.2
57.2	38.4	95.2
57.3	38.5	97
57.4	38.6	97.5
57.5	38.6	98
57.7	38.6	98.3
57.8	38.7	98.7
58.4	38.8	99.1
58.7	38.8	99.3
58.9	39	99.4
59.4	39.2	99.5
59.7	39.2	99.8
59.8	39.3	100.4
59.9	39.4	100.9
60	39.4	101.1
60.9	39.9	101.3
61.5	40.3	101.4
61.6	40.7	101.5
61.8	40.8	101.8
61.8	41.1	102.4
61.8	41.2	102.5
61.9	41.2	104
61.9	41.4	104.3
62.1	41.5	104.4
62.7	41.5	105.1
63	41.7	105.2
63.2	41.8	105.5
63.4	41.9	105.8
63.5	41.9	106.5
63.5	42	107.4
64	42.1	107.7
64	42.1	107.9
64.1	42.1	108.6
64.2	42.1	109
64.6	42.2	109.3
64.8	42.3	109.9
64.9	42.8	109.9
65	42.8	111.7
65.2	42.8	111.9
65.3	43.1	112.1
65.5	43.2	112.4
65.7	43.2	112.6
66	43.7	113.2
66.1	43.8	113.4
66.2	43.9	113.5
66.2	43.9	113.6
66.3	44	114
66.4	44	115.2
66.5	44	115.3
66.5	44.1	115.9
66.6	44.1	116
66.6	44.2	116.4
66.9	44.4	116.4
67.1	44.6	117.1
67.7	44.8	117.7
67.9	45.2	117.8
67.9	45.3	117.9
68.2	45.4	118.4
68.9	45.5	118.5
69.2	45.5	118.7
70.1	45.6	119.1
70.2	45.7	119.6
70.3	45.8	119.8
70.4	46.1	119.9
70.4	46.1	120.9
70.4	46.2	121.1
71.2	46.3	121.8
71.3	46.3	121.8
71.6	46.5	122.1
71.7	46.5	122.1
72.2	46.6	122.6
72.2	46.6	122.8
72.2	46.6	122.8
72.7	46.8	122.8
72.8	46.8	123.2
73.3	47.1	123.2
73.3	47.1	123.7
73.5	47.4	124
73.7	47.4	124
73.9	47.5	124.5
74	47.7	124.6
74.2	47.9	124.6
74.5	47.9	124.8
74.5	48	124.9
74.8	48	125.3
75.1	48	125.7
75.1	48.4	126.2
75.4	48.4	126.3
75.8	48.6	126.4
75.9	48.7	126.5
76	48.8	126.7
76	48.8	126.7
76.4	48.9	126.8
76.7	48.9	127
77.3	48.9	127.4
77.4	48.9	127.6
77.4	49	128.1
77.4	49.1	128.4
77.7	49.2	128.5
77.8	49.2	128.6
77.8	49.3	129.3
78	49.3	129.5
78.3	49.3	130
78.3	49.5	130.3
78.4	49.5	130.4
78.6	49.6	130.4
78.6	49.7	131.2
78.9	50	131.3
78.9	50	131.5
79.1	50.1	131.6
79.7	50.2	131.9
79.7	50.4	131.9
80.3	50.6	132
80.8	50.9	132.9
80.9	51	133.2
81	51	133.5
81.1	51.3	133.7
81.1	51.4	134.1
81.3	51.6	134.3
81.8	51.6	134.6
82	51.6	135
82.3	52	135.5
82.5	52	136.4
82.6	52.1	137.1
82.8	52.3	137.9
82.8	52.4	138.2
83.1	52.4	138.4
83.2	52.9	139.2
83.3	53.2	140.6
83.6	53.3	140.9
83.7	53.3	141
83.7	53.5	141.1
83.9	53.7	141.2
84.1	53.9	141.5
84.1	54	142.3
84.2	54	143.1
84.7	54.1	143.7
84.9	54.2	144.1
85	54.3	144.1
85	54.4	144.4
85.3	54.4	144.8
85.4	54.7	145.1
85.6	54.7	145.5
85.6	54.7	146.4
85.6	54.8	146.7
85.8	54.8	146.8
86.3	55	146.9
86.3	55.1	147.4
86.5	55.1	147.7
86.6	55.2	147.8
86.6	55.2	148.8
87.1	55.4	150.2
87.3	55.8	150.2
87.4	55.8	150.7
87.6	55.8	151.8
88	56.1	151.9
88.2	56.1	152.2
88.5	56.1	152.5
88.6	56.2	153.3
88.8	56.4	153.4
89	56.4	153.6
90	56.4	154
90	56.8	154.4
90.1	56.9	154.5
90.4	57	154.7
90.5	57.2	156
90.6	57.3	156.6
90.7	57.4	156.6
91.4	57.5	156.7
91.4	57.6	156.9
91.5	57.7	157.7
91.5	57.7	158
92.1	57.9	158.4
92.3	57.9	158.9
92.7	58	159.1
93	58	159.3
93	58.1	159.8
93.3	58.2	160
93.4	58.3	160.3
94.1	58.4	160.5
94.3	58.5	161.4
94.7	58.6	161.7
95	58.6	162.2
95	58.7	162.3
95.1	58.9	162.4
95.7	59	162.7
96	59.1	163.1
96.2	59.2	163.6
96.3	59.2	163.9
96.6	59.4	163.9
96.7	59.6	164.5
97	59.7	165.5
98.1	59.9	165.7
98.2	60	165.9
98.2	60.2	166.1
98.3	60.2	166.8
98.4	60.2	168.4
98.5	60.3	168.4
98.9	60.3	169.3
98.9	60.4	169.5
99.1	60.5	169.5
99.2	60.6	169.6
99.3	60.7	169.9
99.6	60.8	170.7
99.9	60.9	170.7
99.9	60.9	171
100	60.9	171.1
100	61.2	171.6
100.9	61.2	171.6
101.2	61.6	171.7
101.5	61.8	171.7
101.8	61.8	172.1
102.1	61.9	172.6
102.2	62	172.8
102.2	62	173.1
102.3	62.1	173.2
102.6	62.1	174.1
103	62.3	174.2
103.2	62.5	174.6
103.7	62.7	174.6
104	62.7	176.9
104.1	62.8	177.1
104.3	63.1	177.7
105	63.6	178.4
105.1	63.6	179.1
105.5	64	179.1
105.7	64	180.8
105.9	64.2	181.5
106	64.2	181.7
106	64.3	181.7
106	64.7	182
106	65	182.3
106.3	65.2	182.7
106.3	65.3	183.1
106.7	65.4	183.7
107.5	65.4	185
107.8	65.5	185.4
108.3	65.6	185.9
108.3	65.7	186.8
108.5	66.3	187.3
108.5	66.4	187.5
108.6	66.6	187.5
108.7	66.8	187.7
108.8	66.9	188.2
108.9	67.1	189.1
109.1	67.1	189.6
109.3	67.1	190.1
109.4	67.3	190.3
109.6	67.4	191
110	67.5	191.3
110.2	67.5	191.3
110.4	67.7	191.7
110.5	67.7	191.7
110.7	67.7	192
110.9	67.9	192.7
110.9	67.9	193.2
111	67.9	194
111	68.2	194.6
111.1	68.4	195.4
111.1	68.5	195.5
111.3	68.7	195.7
111.3	69	196.2
111.5	69	197.4
111.6	69.1	197.8
111.6	69.2	197.9
111.7	69.3	198.6
112.2	69.4	199.7
112.3	69.4	200.2
112.3	69.4	200.2
112.4	69.7	201.1
112.9	69.7	202.1
113.1	69.9	202.1
113.6	69.9	202.5
114.4	70	202.7
114.7	70	203.4
115.1	70	203.9
115.2	70.2	204.4
115.4	70.4	205.2
115.4	70.4	205.7
115.6	70.8	206.1
115.7	70.9	206.7
115.8	71	208
116.1	71	208.1
116.1	71	208.6
116.7	71.1	208.7
116.7	71.4	209.5
117.2	72	209.7
117.2	72	212.1
117.5	72.1	212.1
117.6	72.4	214.1
117.6	72.4	214.2
117.7	72.6	214.3
117.9	72.8	215.7
118.5	72.9	217.1
118.9	73	217.7
119	73.3	218
119	73.3	218.2
119	73.3	218.5
119	73.4	221.3
119.6	73.6	222.2
119.9	73.6	222.3
119.9	73.7	222.4
120.3	73.8	223.9
120.4	73.8	224.6
120.6	74	225.8
120.8	74.1	226.1
121.2	74.3	226.3
121.4	74.6	226.8
121.8	74.7	227.1
121.9	74.9	227.6
122.2	75	227.9
122.3	75.1	228.6
122.4	75.3	228.8
122.8	75.4	229.4
123	75.8	229.6
123	76.1	229.7
123.1	76.1	229.8
123.1	76.2	230.6
123.6	76.2	231.5
123.9	76.3	231.6
124	76.3	232.3
124.1	76.5	233
124.2	76.5	233.3
124.5	76.8	233.3
124.7	77	234
125	77.2	234
125.1	77.2	234.2
125.1	77.4	234.4
125.2	77.4	234.9
126.3	77.7	235.6
126.5	77.8	236.3
127.1	77.8	237.1
127.3	77.8	237.3
127.3	77.9	237.9
127.5	78.1	238.2
127.9	78.1	238.3
128	78.2	239.1
128.1	78.3	241.8
128.2	78.3	242.8
128.5	78.4	244
128.7	78.4	244.2
128.9	78.5	244.8
129	78.7	244.8
129.3	78.8	245
129.4	78.8	245.2
129.5	78.9	245.7
129.7	79.1	245.8
129.8	79.1	247.2
130	79.1	247.3
130.4	79.5	247.4
130.8	79.6	247.6
131.1	79.6	248.2
131.6	79.7	248.5
131.8	79.8	248.5
132.6	79.8	248.7
132.7	79.8	249.7
132.9	79.9	249.8
132.9	80.1	250
133	80.3	250.6
133.7	80.3	250.8
133.8	80.4	251.3
134	80.6	251.5
134.1	81	251.9
134.4	81.1	252
135.2	81.2	252.3
135.2	81.4	252.5
135.2	81.9	252.9
135.4	82	253
135.8	82.1	255.1
136	82.3	256.4
136.4	82.4	256.7
136.6	82.6	257.6
136.6	82.6	258.1
136.9	82.6	258.7
137.2	82.7	258.9
137.4	82.7	260
137.9	82.7	260.3
138.1	82.7	260.6
138.2	83.1	263.7
138.3	83.2	263.8
138.3	83.2	264.1
138.4	83.2	265.1
139.4	83.3	265.3
139.9	83.4	266.4
140.1	83.4	266.4
140.1	83.5	267
140.7	83.5	267.3
141.3	83.5	267.8
141.8	83.8	268.7
141.8	83.9	268.8
141.9	83.9	268.9
141.9	84	269.4
141.9	84.3	269.6
142	84.3	270.4
142.2	84.4	270.9
142.3	84.4	271.2
142.4	84.4	271.3
143	84.4	271.9
143.4	84.5	272
143.5	84.5	272.7
143.8	84.7	272.9
144.1	84.9	273
144.4	84.9	274.1
145.3	85	274.1
145.6	85.2	274.7
145.8	85.2	275.4
145.8	85.2	276.1
146	85.2	276.5
146.1	85.4	276.8
146.2	85.5	277.1
146.3	85.7	277.4
146.3	85.7	278.8
146.6	85.8	278.8
146.7	86	280.2
146.8	86.3	280.8
147.3	86.6	280.9
147.7	87.1	281.5
147.7	87.2	282.9
147.7	87.3	283
147.8	87.4	283.1
149.7	87.6	283.3
150.1	87.7	285.4
151	87.8	285.5
151.1	87.8	288.7
151.2	87.9	289
151.5	88	289.8
151.5	88.1	289.8
151.7	88.1	290
151.8	88.2	290.1
152.2	88.3	290.3
152.4	88.3	291.2
152.6	88.6	292.2
152.7	88.8	293.1
153.2	88.8	293.5
153.6	89.5	293.6
153.9	89.5	294.9
154	89.8	296
154.1	90	296.3
154.4	90.1	298.9
154.5	90.1	299.1
154.6	90.2	299.2
154.9	90.3	299.9
155.3	90.4	300.1
155.8	90.7	300.4
155.9	90.8	301.8
156	91	302.6
156	91.1	303.7
156.3	91.1	303.8
156.5	91.2	303.9
157.4	91.2	304.5
157.6	91.2	304.5
157.8	91.2	305.2
158	91.6	305.5
158.1	91.6	305.7
158.2	91.7	307.1
158.3	91.7	308.7
158.8	91.9	309.1
160.1	92	309.6
160.4	92	310.3
160.5	92.4	310.8
161.3	92.5	311.2
161.7	92.5	311.8
161.7	92.6	312
161.8	92.7	312.4
162	92.8	312.5
162.1	92.8	313.4
162.2	92.9	313.4
162.9	92.9	313.7
163.3	93.2	314
163.4	93.2	314.5
164.1	93.4	318.2
164.3	93.4	318.4
165.2	93.5	319
165.6	93.8	319.3
165.8	93.8	319.6
166.4	93.9	321.4
166.5	94.2	321.8
166.8	94.2	321.8
166.8	94.3	322.5
167.1	94.3	323.1
167.1	94.4	323.3
167.4	94.4	323.9
167.6	94.5	324.3
167.8	94.5	325.3
168	94.7	326
168.6	94.8	327.5
169.1	95.1	327.5
170.3	95.2	327.8
170.3	96	328.5
170.4	96	328.7
170.5	96	328.9
170.7	96.2	329.1
171	96.3	329.9
171.1	96.5	330.9
171.6	96.5	331
171.8	96.9	331.7
171.8	97	331.8
172	97.2	333.6
172.1	97.2	335.1
172.4	97.2	335.2
172.6	97.5	335.3
172.9	97.5	335.7
173	97.6	336.1
173.1	97.7	336.4
173.4	97.8	336.7
173.6	97.9	336.8
173.6	98	338
174.2	98.2	338.3
174.4	98.5	338.4
174.5	98.5	339.4
174.7	98.6	341.5
175.1	98.6	341.8
175.1	98.6	342.1
175.1	98.9	342.2
175.3	99.2	345.3
175.4	99.2	345.6
176.3	99.2	346.1
176.8	99.3	346.7
177	99.5	347.5
177.9	99.8	348.1
178	99.9	348.6
178.6	100	349.6
178.9	100.1	350
179	100.3	350.6
179.2	100.4	350.7
179.5	100.5	351.7
179.5	100.6	351.7
179.7	100.6	352.7
179.9	100.6	354
181	100.9	354.7
181.6	100.9	354.9
181.7	101.1	357.3
182	101.1	358
182	101.4	358
182.2	101.6	358.2
182.5	102.2	359.2
182.6	102.2	359.5
182.9	102.3	359.7
183.1	102.6	360.7
183.2	102.7	362.7
183.2	102.8	363.6
183.2	102.9	364.2
183.3	103	364.4
183.6	103.1	364.5
183.6	103.6	365.5
183.8	104	366.3
184	104.1	366.5
184.3	104.2	366.7
184.4	104.3	367.2
184.7	104.6	368.9
185.4	104.7	369.4
185.5	104.8	369.6
186	104.8	370.1
186.3	105.2	370.1
186.3	105.2	370.3
186.7	105.2	371.4
187.2	105.3	371.8
187.2	105.4	372.4
187.6	105.6	372.5
188.3	105.6	373.9
188.5	105.7	373.9
188.5	105.8	375.4
189	106	379.6
189	106.1	380
189.2	106.2	381.8
189.3	106.4	381.9
189.4	106.6	382.1
189.8	106.7	386
190.1	107.2	386.1
190.5	107.3	388.5
191	107.3	390.2
191.2	107.4	390.3
191.3	107.4	390.5
191.3	107.5	390.9
191.5	107.5	391.1
191.6	107.6	391.2
191.6	107.7	391.6
191.6	107.8	392.3
191.7	107.8	394.6
192.2	107.8	396.2
192.6	107.9	396.5
192.8	108.2	397.4
192.8	108.8	398.5
192.9	109.2	399.1
193.3	109.3	401.1
193.7	109.4	401.2
193.8	109.4	401.5
193.8	109.4	402.3
193.9	109.6	402.6
194.3	109.7	403.5
194.4	109.7	404.8
195	109.9	404.8
195.1	110	405.7
195.2	110	407.3
195.2	110	407.5
195.4	110.4	407.6
195.7	110.5	408.2
196.9	110.6	411.1
197.2	110.7	411.3
197.5	110.7	411.6
197.6	110.8	411.8
197.6	110.8	412.1
198.1	111.2	412.2
198.2	111.7	413.9
198.4	111.8	414
198.7	111.9	414.2
199.4	112	415.8
199.8	112.2	415.8
199.8	112.3	417.8
200	112.4	417.9
200	112.6	418.3
200.3	112.8	418.8
200.3	112.9	419.3
200.5	113	419.6
200.7	113.3	420.1
201.1	113.6	420.8
201.5	113.7	421
201.6	113.9	421
202	114.4	422.4
202.1	114.4	423.4
202.2	114.4	425.3
202.5	114.5	426.7
203.3	114.6	426.8
203.5	114.7	428.7
203.7	114.9	428.7
203.8	114.9	430.3
203.9	115	430.8
204.2	115.2	433.3
204.2	115.2	433.5
204.3	115.4	434.3
204.4	115.4	434.3
205	115.6	434.5
205	115.6	435
205.2	115.7	435.4
205.6	115.9	435.6
205.7	116.1	437.1
205.7	116.2	437.5
206.1	116.2	437.7
206.7	116.2	437.9
206.7	116.4	438.6
207	116.6	439.2
207.3	116.6	439.5
207.4	116.8	439.9
207.7	116.9	441.3
207.7	117	441.3
208.1	117	441.6
208.4	117.1	441.9
209	117.1	442.5
209.7	117.1	444.3
209.8	117.3	444.4
210.8	117.3	445.7
211.2	117.4	446.1
211.4	117.7	446.7
211.9	118	446.9
212.2	118.3	447.6
212.4	118.6	447.9
212.6	118.9	447.9
213	118.9	447.9
213.2	118.9	448.1
213.3	119	448.8
213.4	119.2	448.8
213.6	119.3	450
213.8	119.7	452.2
214.2	120	453.2
214.6	120	453.8
214.7	120.2	455.1
214.7	120.4	456
215	120.7	456.1
215.1	120.9	456.2
215.8	121.2	457
216.4	121.4	457.5
217.4	121.7	458.2
217.7	121.9	462.3
218.2	121.9	463
218.9	122	463.5
219.3	122	464.4
219.4	122.3	466.9
220.5	122.4	466.9
221.2	122.5	468.7
221.7	122.8	470.2
222.1	122.8	470.3
222.4	123	471.5
222.4	123	473
222.7	123.1	473
222.9	123.2	473.2
223.2	123.4	476.6
223.3	123.5	477.3
223.3	123.5	477.4
223.8	123.6	478.9
223.9	123.7	486.7
224.2	123.8	486.7
224.3	123.9	489
224.6	124	489.4
224.8	124	489.6
225.2	124.1	489.9
225.3	124.1	490.7
225.4	124.3	491.9
225.4	124.3	492
225.5	124.5	493.3
225.7	124.6	493.4
225.8	124.7	494.3
225.9	125.1	494.6
226.1	125.2	494.8
226.5	125.2	495.7
226.5	125.3	495.8
226.7	125.4	495.9
227.3	125.7	497.4
227.4	125.9	498.3
228.4	126	498.6
229	126	499
229.2	126.2	499.9
229.4	126.3	501.1
230	126.6	502.3
230.3	127	502.6
230.5	127	502.7
230.8	127.2	503.8
231	127.3	504.6
231.2	127.7	505.6
231.5	127.8	508.2
231.8	127.8	508.2
231.9	127.9	508.4
231.9	128.1	510
232.4	128.3	510.2
232.9	128.6	512.6
233.2	128.6	514.1
233.8	128.6	514.4
234.1	128.8	515.7
234.4	128.9	516.7
234.9	129.2	519.4
235	129.3	519.8
235	129.4	519.9
237.2	129.4	520.4
237.4	129.7	522.9
237.5	129.8	523.3
237.9	129.8	524
239.2	130	524.1
239.3	130	525.3
240.3	130.2	525.5
240.3	130.9	527.5
240.5	130.9	531.6
241.1	131	532.2
241.3	131.1	532.7
241.7	131.5	533.8
241.7	131.6	533.8
241.8	131.6	534.8
242.6	131.6	537.1
243.2	132.2	538
243.8	132.3	540
243.9	132.8	540.2
244.4	132.9	541.5
244.6	133	542.3
244.8	133.1	542.7
245.6	133.2	542.8
245.6	133.3	543.1
245.9	133.3	545.7
246.4	133.4	546.7
247	133.6	546.9
247.1	133.7	549.2
247.1	133.9	549.4
247.5	134	549.7
247.8	134.1	549.9
248.1	134.1	550.2
248.3	134.1	550.6
248.3	134.2	550.7
249.2	134.2	551.2
249.4	134.2	551.4
250	134.3	552.1
250.2	134.3	552.3
250.4	134.4	552.4
250.8	134.4	553.8
250.9	134.5	555.3
251	134.6	555.7
251	134.7	556.8
251.3	134.9	557.7
251.3	134.9	560.9
251.5	134.9	564.9
251.9	135.1	565.1
252.1	135.1	565.8
252.4	135.3	567.8
252.5	135.3	567.9
252.9	135.5	568.7
253.2	135.6	571.3
253.3	135.8	572.6
253.3	136	572.9
253.6	136.1	574.7
253.8	136.1	574.9
253.9	136.4	575.5
254.4	136.6	580.2
254.5	136.7	581
254.5	136.9	581.1
254.9	137.1	581.3
255.2	137.2	582.1
255.7	137.3	583
256.8	137.5	583
257.1	137.8	583.8
257.2	138.4	584.1
257.3	138.6	585.4
257.5	138.9	585.9
257.6	139.1	587.2
258.2	139.1	589.6
258.3	139.3	590.3
258.7	139.5	591
259	139.5	592.3
260.5	139.8	593.5
260.7	140.1	595.7
260.7	140.1	596.1
260.8	140.4	597.5
261.3	140.5	598
261.4	140.7	598.6
261.7	140.7	601.4
261.9	140.7	601.7
262.1	140.8	605.7
262.9	141	605.7
262.9	141.1	607.4
263.1	141.2	608
264.2	141.3	608.2
264.4	141.5	608.9
264.5	141.5	609.3
264.6	141.7	609.3
265	141.9	609.4
265	142.1	609.5
265	142.5	611.3
265.2	142.9	611.4
265.3	143.1	612.5
265.4	143.2	612.9
265.8	143.4	615.1
265.8	143.5	615.1
266.8	143.5	615.3
266.8	143.7	615.8
267	144.2	616.4
267.3	144.4	619.5
267.4	144.7	621.9
267.7	145	622
268	145	623.9
268.6	145.2	624.5
269	145.3	625.4
270.1	145.5	628
271.2	145.6	631.9
271.5	145.7	635.3
271.5	145.7	635.8
272.2	145.7	636.1
273.3	145.9	640
273.4	145.9	640.3
274.4	145.9	640.5
274.6	146	642.7
274.9	146.2	643.8
275.2	146.2	644.7
275.8	146.2	644.9
276.1	146.3	646.3
276.3	146.4	646.4
276.4	146.5	646.5
276.7	146.8	646.5
276.7	147	648
277.6	147	648.2
278	147.1	648.3
278.4	147.1	649.7
279.4	147.4	650.2
279.7	147.4	650.5
279.7	147.5	650.7
280.9	147.6	650.9
281	147.6	652
281.7	147.7	652.5
282.4	148.6	653.4
282.4	148.8	655.1
282.9	148.8	655.8
283.2	149	656.3
283.2	149.3	658.3
283.6	149.3	658.6
284.1	149.4	661.4
284.1	149.7	663.4
284.1	149.7	663.7
284.5	149.7	664.3
285.3	149.9	665.2
285.3	149.9	665.7
286	149.9	667.3
287.1	150	669.7
287.2	150	670.3
287.6	150.1	670.5
287.6	150.2	671
287.8	150.2	673.8
287.8	150.4	673.8
288	150.5	675.9
288.2	150.6	676.6
288.4	150.8	677
288.5	151.2	677.6
288.6	151.3	678.7
288.7	151.4	678.9
289	151.6	679.3
289.5	151.6	680
290	151.6	681
290.5	152.3	682.1
290.7	152.7	683.2
291.4	152.8	683.2
291.6	153	683.8
291.7	153.4	683.9
291.8	153.4	684
291.9	153.6	684.6
292.2	153.6	686.1
292.5	153.6	687.2
292.7	153.7	688
293.3	153.7	688.7
293.6	153.8	689.1
293.9	153.9	689.8
294.5	154.1	692.3
295	154.1	693
295	154.2	693.2
295.1	154.4	693.8
295.1	154.8	696.8
296	155	698.2
296.1	155.1	700.5
296.1	155.3	701.6
297.1	155.3	702.5
297.1	155.6	702.8
297.1	155.9	705
297.1	156	706.3
297.3	156	707.5
298.4	156.3	707.7
298.5	156.4	708
299.1	156.5	709.2
299.2	156.6	710.7
299.7	156.6	711
300.6	156.6	712.9
300.7	156.7	713
300.8	156.8	713.3
300.8	157.1	714.2
301.7	157.4	714.4
301.8	157.6	715.4
302	157.7	721.3
302.7	157.8	722.1
302.7	158	722.7
302.9	158.1	723.5
303	158.2	724.1
303.3	158.4	724.3
303.7	158.6	724.7
303.8	158.7	724.7
303.8	158.7	726.9
303.9	158.8	727
304	158.8	734.3
304.2	159.1	734.6
304.2	159.2	735.8
304.6	159.3	737
305	159.6	738.4
305	159.9	739.1
305.6	159.9	741
305.7	160.3	741.1
305.8	160.5	741.5
306.2	160.6	742.2
306.2	160.8	746.5
306.5	160.8	747.3
306.6	160.9	747.6
306.7	161.5	749.2
306.9	161.5	751.4
307.1	161.6	751.6
307.3	161.6	754.5
307.5	161.9	756.5
308.3	161.9	756.9
308.7	161.9	757.1
309	161.9	757.6
310.7	162	759.4
310.7	162.1	760.2
310.8	162.1	761.5
311	162.4	762
311.7	162.7	763.9
311.8	162.7	764.1
312.3	162.9	767.2
312.8	163.3	770.4
313	163.5	772.4
313	163.5	775.1
313.2	163.6	777.6
313.2	163.8	779.1
313.9	164.3	780.7
314.3	164.3	781
314.3	164.3	781.3
314.9	164.5	783.3
315.2	164.5	784.3
315.5	164.7	784.9
315.9	164.8	785.2
316	164.8	789.1
316	164.8	791
316.1	164.9	792.6
316.4	165	794.5
316.5	165.1	795.8
316.8	165.2	797.1
317.2	165.2	798.5
317.5	165.2	798.6
317.7	165.5	807.9
319	165.8	808.5
319	165.9	809.4
319.1	166.1	809.8
319.2	166.1	811.2
319.6	166.7	814.5
319.9	166.8	815
320.3	167	816.6
320.5	167.2	818.2
320.8	167.2	818.3
321.3	167.3	818.9
321.5	167.6	821.9
321.6	167.6	822.7
321.7	167.8	824.9
321.8	167.8	827.4
322.8	167.8	828.9
323	167.9	829
323.4	168	829.8
323.4	168.1	831.5
323.5	168.3	832.9
323.6	168.5	834
323.6	168.5	834.8
324.1	168.8	837.1
325.5	169	837.6
326.4	169.1	837.6
326.7	169.1	838
327	169.2	840.6
327.5	169.7	840.9
327.6	170.3	841.6
329	170.9	841.7
329	170.9	842
329.6	171	843.2
330.3	171.4	843.7
330.6	171.4	845.7
330.7	171.5	847.5
331.2	171.7	848.2
332.2	172	849.4
333.1	172	849.7
333.2	172.1	850.6
333.5	172.1	851.4
333.6	172.1	852.9
333.8	172.3	854.5
333.9	172.5	854.8
335	172.6	859
335.4	172.8	865.6
335.7	172.8	865.6
336	173.3	869.7
336	173.4	869.8
336.1	173.5	870.7
336.1	173.6	870.9
336.2	173.8	879.6
336.3	174	880.7
337.1	174.1	882.6
337.4	174.2	885.9
337.5	174.5	887.4
338.4	174.8	887.8
338.6	174.9	889.6
339.2	175.1	890.4
339.3	175.2	890.9
339.8	175.6	893.6
340.1	175.6	895.4
341.7	175.9	896.6
342	176	898.7
342.7	176.1	903.7
343	176.2	904.7
343.8	176.3	909.9
344.4	176.4	910.9
344.8	176.4	911.3
345.5	176.6	915.1
345.6	176.6	915.2
345.6	176.7	916.8
346.8	177	921.4
346.8	177	921.8
347.4	177	927.7
347.5	177.1	934.8
348.7	177.2	936
349.2	177.5	937
349.5	178.2	941.9
350.1	178.4	942.1
350.3	178.5	942.5
350.4	179	942.9
350.5	179.3	943.7
351.4	179.3	944
351.4	179.7	946.3
351.6	180	947.4
351.9	180.1	948.4
352.4	180.1	948.4
353	180.2	948.6
353.7	180.4	952.2
353.8	180.4	954.4
353.9	180.6	957.1
353.9	180.9	958.6
354.1	181.1	967.5
354.2	181.2	970.7
354.3	181.4	971.7
354.7	181.9	975.2
354.9	181.9	977.6
355	181.9	983.7
355.4	182.1	985.1
356.4	182.2	988
357.6	182.5	995.4
357.7	182.9	995.6
357.8	183	1002.4
359.1	183.1	1004.6
361.8	183.2	1006.2
361.9	183.4	1007.8
362.2	183.7	1008.8
362.5	183.9	1009.6
362.7	184.2	1011.3
362.7	184.4	1012.9
363.4	184.4	1014.3
363.4	184.4	1018.5
364.4	184.6	1019.5
365.3	184.6	1024.6
366.2	184.7	1025.5
366.4	185	1028
366.5	185.2	1030.6
366.5	185.5	1032.2
367.1	185.6	1036
367.3	185.6	1037
368.6	185.8	1037.8
369.4	185.9	1043.8
369.7	186.1	1044.3
370	186.2	1047.2
371.1	186.4	1049.3
371.5	186.5	1049.5
371.7	186.9	1058.6
371.9	187	1068.3
372.4	187	1070
372.5	187.1	1070.5
372.8	187.2	1071.4
373.5	187.6	1073.2
374.1	187.6	1073.2
374.2	187.8	1074.9
375	187.9	1077.9
375.1	188.1	1079.5
375.7	189.2	1083
375.7	189.4	1084.6
376	189.5	1086.7
379.4	189.7	1088
379.4	190.4	1088.6
379.6	190.4	1089
379.8	190.9	1095.7
380.3	191	1099.2
380.4	191.1	1102
380.6	191.2	1102.2
381	191.3	1102.9
381	191.8	1112.6
381.1	192	1114.2
381.5	192	1118.1
381.7	192.4	1123.2
382.4	192.5	1129.9
382.7	192.5	1133.3
384.3	192.6	1137.1
384.3	192.7	1144.8
384.4	193.1	1146
384.6	193.3	1147.7
385.2	193.3	1147.9
386.9	193.7	1155.8
386.9	194	1156
388.3	194	1157.4
388.5	194.2	1157.9
389.3	194.2	1160.5
389.8	194.4	1161.8
389.9	194.4	1163.6
390.1	194.6	1164.2
390.3	194.7	1166
390.6	194.8	1173.9
390.6	194.9	1176.2
391.2	195.3	1183.9
392.1	195.4	1185.1
392.5	195.5	1186.1
393.2	195.6	1186.5
393.9	195.7	1189.6
394.1	195.9	1196.4
394.1	196.1	1197.2
394.2	196.3	1198.6
395.2	196.3	1198.6
397.3	196.5	1200.6
397.7	196.8	1203.2
398	197	1210.7
398.1	197.1	1210.8
398.9	197.4	1211.9
399.4	197.5	1214.6
400.4	197.5	1215.5
401.9	197.7	1216.6
402.1	197.8	1234.3
402.3	197.9	1235.3
403.4	198	1235.4
404	198.1	1242.7
405.1	198.2	1252.1
406.2	198.8	1265.2
406.9	198.8	1266.7
407.1	198.9	1268.5
408.2	199	1270.3
409.8	199.2	1282.9
409.9	199.2	1284
410.2	199.3	1287
410.7	199.4	1287.4
410.8	199.5	1287.7
411	199.5	1291.7
411.4	200	1293.2
411.4	200.8	1294
411.5	200.8	1294.6
411.8	201	1294.8
411.9	201	1295.9
412.4	201.5	1296.1
413.4	201.6	1297.1
413.5	201.8	1299.3
413.7	201.9	1300.9
413.9	202.4	1302.3
413.9	202.4	1306.6
414.2	202.5	1310.6
415.4	202.5	1310.8
415.6	202.8	1313.4
415.8	202.8	1320.1
416.1	202.8	1333.6
416.1	203.3	1335.7
416.6	203.8	1340.7
417.1	203.9	1343.4
417.1	204.4	1346.3
417.4	204.4	1348.5
417.7	204.5	1353.2
418.8	204.9	1356.6
418.8	204.9	1358.4
419.2	205	1364.1
419.4	205	1372.9
419.7	205.6	1376.2
420.2	205.6	1378.9
420.3	205.9	1378.9
420.7	206.3	1379.1
421.1	206.6	1381
421.9	206.9	1383.9
422.9	207	1385.1
423.1	207.2	1386.1
424.2	207.3	1386.2
424.6	207.5	1388.1
424.6	207.9	1390.5
425.1	207.9	1392.6
426.3	208.1	1395.6
427	208.1	1398
427.1	208.6	1402.9
427.7	208.7	1405.2
429.5	209.2	1411.4
429.9	209.2	1415
430.8	209.7	1417.8
431.2	209.8	1418.9
432.5	210.3	1419.9
433	210.4	1427.6
433.1	210.4	1429.7
433.4	211.1	1432
433.7	211.5	1443
435.1	211.9	1445.6
436	212.1	1446.1
436.9	212.1	1448.8
437.8	212.5	1449.5
439.1	212.5	1463.2
440.2	212.8	1464.3
440.4	213	1471.5
440.6	213	1472.3
441.4	213.2	1477.2
441.5	213.4	1480.3
442.2	213.8	1488.8
443.1	214.1	1489.6
444.2	214.2	1490.2
444.5	214.2	1495.3
444.7	214.3	1496.2
444.9	214.6	1497
444.9	214.7	1498.6
445.8	214.7	1499.7
446	215	1505.1
446.9	215	1507.6
450.5	215.1	1510.3
450.8	215.3	1514.6
450.8	215.4	1523.1
451	215.6	1530.1
451.2	215.9	1530.4
452.4	216	1533.1
453.1	216.2	1541.6
453.2	216.2	1562.6
453.6	216.6	1564
454.2	216.7	1566.6
454.2	216.9	1571.7
454.6	217.1	1572.5
455.4	217.1	1584.9
455.8	217.3	1586
457.2	217.5	1594.1
457.3	217.7	1595.6
457.7	217.9	1606.8
457.8	218.5	1608.8
458	218.8	1609.7
459.6	218.8	1614.7
460.5	218.9	1615.9
462	218.9	1616.2
462.3	219.1	1630.2
462.6	219.1	1631.2
462.6	219.2	1641.6
462.8	219.3	1643.9
462.9	219.4	1650.3
463.3	219.5	1656.5
464.5	219.8	1657.4
464.6	219.9	1683.3
464.7	220.1	1693.5
464.8	220.2	1694.8
465	221.1	1703.4
465.5	221.4	1706.8
466.2	221.5	1713.2
466.6	222	1715.1
466.7	222.2	1717.5
468.2	222.3	1717.9
469.2	222.3	1720.8
469.5	222.3	1729.3
470.1	222.5	1731.9
470.2	222.5	1732.7
471.1	222.8	1740.5
471.1	222.9	1743.1
471.4	223	1750.3
472.2	223	1753.4
473.3	223.2	1753.5
473.5	223.2	1765.2
473.6	223.5	1767.2
474	223.5	1771.3
474.1	223.7	1817.5
474.3	223.7	1818.5
476	223.8	1820.7
476.4	224	1824.5
477.4	224.1	1832.3
477.5	224.4	1835.8
480.1	224.8	1841.2
481.1	224.8	1851.5
481.3	224.9	1873.2
482.2	225.4	1875.8
483.8	225.6	1879.5
486.2	226	1887
486.6	226.3	1895.8
488.1	226.4	1918.5
489.6	226.6	1926.1
490.6	226.7	1929.8
491	226.8	1936.8
491.4	226.8	1949.8
492.8	226.9	1971.1
493.6	227	2014.5
493.8	227.2	2028.8
494.2	227.7	2031.8
494.8	228.1	2057.3
496.1	228.6	2060.4
496.5	228.8	2064.2
496.6	229.4	2065.2
496.9	229.4	2074.2
497.1	229.4	2079.5
498.5	229.5	2085.5
498.6	229.7	2108.5
499.9	230.2	2111.8
500.1	230.6	2115.7
500.1	230.6	2116.5
503.1	230.6	2119.1
503.2	230.6	2133.5
503.3	230.7	2141.7
504	230.8	2146.6
505.9	231.1	2183.7
506.2	231.2	2190.6
506.9	231.4	2212.6
506.9	232.6	2221.6
507.2	232.7	2222.8
507.3	232.9	2231
507.5	233	2254.6
507.7	233.1	2266.8
513.8	233.2	2269.6
514	233.2	2271.7
514.2	233.3	2313.4
514.8	233.3	2315.5
515.1	233.4	2339.8
515.2	233.7	2365.5
515.7	233.9	2388.2
515.9	233.9	2437.3
516.3	234.1	2500.2
517	234.1	2529.9
517.1	234.1	2532.2
521.4	234.2	2547.3
521.5	234.2	2581.3
521.6	234.9	2605
522.7	235.1	2668.3
523.6	235.3	2690.3
523.7	235.3	2693.9
523.8	235.4	2703.1
523.9	235.6	2707.5
524.1	236	2716.7
525.4	236.2	2730
526.8	236.4	2735.4
527.7	236.5	2742.4
528	236.7	2755.5
528.1	237.3	2763.6
529	237.5	2785.8
529.6	238	2853.7
529.8	238.6	2863.3
529.9	238.7	2931.5
529.9	238.7	2936.9
530.8	239	2972.6
531.2	239	3015.1
531.6	239.1	3060.8
531.6	239.2	3087
532.3	239.3	3091.7
533.3	239.4	3114.2
533.6	239.5	3121.3
533.7	239.5	3150.7
534.3	239.7	3163.1
536.5	240	3208.2
536.9	240.1	3216.4
537	240.1	3262.2
537.2	240.2	3306.5
537.2	240.3	3490.8
537.4	240.5	3546.5
537.7	240.8	3573.2
538	240.8	3816
538.7	240.8	3912.6
539	241	4071.3
539.3	241.1	4077.6
539.6	241.6	4094.6
543	241.6	4161.6
544.3	241.7	4370.4
544.6	241.8	4715.6
545.5	242	4790.9
545.5	242.1	4808.5
548.8	242.6	4956.2
548.8	242.7	4980.7
548.8	242.7	4989.1
549	242.7	4999.8
549.3	242.8	5641.5
549.4	242.9	5663.1
549.4	242.9
549.9	243.1
550.5	243.2
551.3	243.2
551.5	243.4
551.6	243.7
551.9	243.9
552	244.3
553.4	244.5
554.3	245.2
554.4	245.3
554.5	245.3
554.5	245.6
554.7	246
555.2	246.4
557.2	247
558.6	247
559	247.1
559.7	247.4
560.1	247.6
560.8	247.9
561.1	247.9
561.3	248.1
562.6	248.2
562.9	248.5
562.9	249
565.3	249.1
565.4	250.2
565.6	250.8
566	250.9
567.1	251
568	251.1
568.3	251.2
568.5	251.4
569.6	252.1
569.6	252.6
570.1	252.7
571.1	253.5
571.3	253.6
571.5	254
571.9	254
572.4	254.7
572.7	254.7
572.9	255.1
572.9	255.1
573.5	255.1
574.1	255.1
574.4	255.1
574.7	255.2
575.3	255.2
575.4	255.4
575.5	256.1
575.9	256.3
577	257.1
577.9	257.4
579	257.4
579.8	257.5
581	257.6
581	257.8
582.1	257.8
582.4	257.8
582.6	257.9
582.9	258
584.3	258.1
584.5	258.2
586.2	258.8
586.2	258.9
587.1	258.9
587.1	258.9
587.2	259
588.9	259.3
589.9	259.4
590.7	260.3
591	260.9
591.4	260.9
591.5	261.2
593.2	261.2
594.6	261.2
594.6	261.5
596.1	261.6
596.2	262.1
596.3	262.2
597.2	262.5
597.2	262.5
597.9	262.6
598.1	262.9
598.8	263
598.9	263.1
599.2	263.2
601	263.3
601.1	263.4
601.1	263.7
601.7	263.8
602	264.3
602.1	264.7
603.2	264.7
603.8	264.9
603.9	265
604	265.2
605.7	265.3
606.4	265.6
606.8	265.6
606.9	265.9
607.5	266.4
608.1	266.6
608.9	266.9
609	266.9
610.4	267.2
612.8	267.7
612.9	268.3
613.7	268.3
613.8	269
614.1	269
616.5	269.4
616.8	269.6
618.6	269.6
619.4	271
619.7	271.4
621.1	271.4
621.2	271.6
621.8	271.7
622.5	271.9
622.7	272.4
622.7	272.5
624	274.1
624	274.3
624	274.7
624.2	274.7
625.6	275.1
626.3	275.2
626.5	275.3
627.3	275.4
627.5	275.6
628	275.6
628.6	275.7
630.4	275.8
633.6	277.1
634.2	277.3
634.4	277.7
634.7	277.8
634.7	278
635.6	278.3
637.6	278.4
640	278.5
640.8	278.7
642.3	278.9
642.5	278.9
645.1	279.1
647.3	279.9
647.8	280.2
648.5	280.3
648.7	280.4
648.7	280.7
650.2	281.3
650.2	282.5
650.4	282.5
650.5	282.5
650.8	282.7
652	282.7
652.8	283.1
653.1	283.1
653.7	283.3
654.4	283.3
655.2	283.4
655.5	283.4
656.2	283.8
658	284
658	284.5
658.6	284.5
660.8	284.6
661.2	285.3
662.5	285.5
664.8	285.5
664.9	285.9
665.7	286
665.7	286.2
667.5	286.5
668.6	286.5
668.8	286.8
669.2	287.2
670.3	287.7
671.6	288
671.7	288.2
672.8	288.9
673.7	289.1
673.7	289.2
674	289.4
674.5	289.5
675	289.8
675.4	290
676.1	290.2
676.2	290.7
676.2	291.8
676.6	291.9
677.7	292.4
677.9	293.2
679.4	293.3
681	293.5
681.3	293.5
681.3	293.6
681.8	294.2
682.3	294.4
683.8	294.8
686.5	295
686.9	295.2
688.3	295.4
689.3	295.4
690.7	295.5
691.1	296.4
691.8	297.2
695.2	297.3
695.9	297.3
696.6	297.4
696.7	297.8
696.8	298.1
697.1	298.1
697.5	298.1
699.2	298.4
700.9	299.6
701.2	300.2
701.3	300.2
703.7	300.3
704	300.6
704.2	300.9
706	301.5
708.4	301.6
709.6	302.7
709.7	302.7
709.9	302.8
710.3	303
711.2	303.3
712	303.4
712.4	303.7
712.4	303.7
714.3	303.8
714.8	304.4
715.1	304.6
715.3	305
716.7	305.2
717.1	305.3
719.2	305.4
720.5	305.5
720.6	306.4
720.8	306.5
721.7	307.2
722.5	307.3
723.1	307.7
723.4	308.7
723.8	309.1
724	309.4
724.9	309.4
724.9	309.4
726.4	309.9
726.6	310.4
726.7	310.4
727.4	310.5
727.8	310.7
728.4	311.3
729.1	311.3
730.4	311.4
732	311.7
732.2	311.8
732.4	311.9
732.4	312.1
733.8	312.2
733.9	312.3
735.6	313
736.7	313.2
737.9	313.4
737.9	313.6
738	314.9
739	315
739.3	315.1
740.2	315.3
744.3	315.7
745.8	316.1
746.4	316.3
746.9	316.4
747.4	316.7
748.1	317.1
748.2	317.6
751.1	317.6
751.9	318
756.5	318
759.5	318.4
759.9	318.8
760.1	319
760.9	319.3
761.1	319.6
761.3	320.7
761.7	321.7
763.3	322.2
765.1	322.7
766.2	323
767	323.5
767.1	323.7
767.2	324.2
767.4	324.3
768.7	324.6
769.3	325.4
770.4	326
771.3	326.1
772.9	326.4
773.3	326.5
774.5	327
774.5	327
775.9	327.1
776.7	327.1
777.3	327.5
781	328.6
781.1	329.7
781.4	330.3
782	330.5
782.4	330.6
784.2	330.9
[truncated: 1,166 more rows]
