# Supplementary material for: Huntingtin recruits KIF1A to transport synaptic vesicle precursors along the mouse axon to support synaptic transmission and motor skill learning
Source: eLife. 2023 Jul 11;12:e81011. doi: 10.7554/eLife.81011 (PMC10365837; doi:10.7554/eLife.81011)
Supplement: Figure 3—source data 1. [file elife-81011-fig3-data1.xlsx]

## Sheet: PPR (1st and 2nd response)
EPSC 2 compare to EPSC1
Wild-type
interval(ms)	25	50	100	250	500
	167.989	152.005	135.039	107.311	104.327
	136.492	108.664	96.7045	82.6754	83.0514
	82.9521	78.0768	54.6972	49.7804	57.4374
	108.392	108.688	150.424	88.0985	81.6483
	142.672	114.441	123.165	94.0653	92.5321
	109.665	106.26	79.7787	77.4787	75.3043
	96.3227	94.8183	78.5262	58.2647	75.3172
	102.025	94.5966	87.5588	77.7646	77.986
	195.741	134.103	145.712	107.954	94.6824
	152.06	124.63	142.757	69.23	84.0832
	167.054	128.69	104.661	113.416	113.059
	129.744	115.06	77.844	63.6333	69.6275
	144.607	117.923	123.78	94.382
HTT-SD
interval(ms)	25	50	100	250	500
	102.211	65.3569	62.3499	56.2261	74.823
	132.294	125.993	91.4073	91.2937	79.9185
	101.604	96.3648	96.7106		84.7585
	87.0816	66.8699	61.27	57.4783	78.0904
	128.155	97.4024	106.527	101.557	75.2782
	94.8583	103.276	93.7191	110.98	93.4027
	114.1	127.278	118.3	99.6741	90.5651
	63.9916	75.9311	67.6386	78.025	72.866
	79.3239	88.1865	83.3391
	53.0953	57.6473	65.4692	74.7713	85.5511
	109.462	109.409	91.8579	81.9725	81.8007
	140.153	124.101	98.6189	82.7553	63.4438
HTT-SA
interval(ms)	25	50	100	250	500
	100.767	116.748
	140.088	115.713	115.917	79.1995	83.8362
	151.229	185.694	147.979	95.4442	103.708
	141.617		129.627
	113.267	91.6431	70.1788	61.306	68.0756
	197.016	143.766	127.959	84.1932	89.9139
	244.35	206.604	162.107	118.384	89.933
	118.807	123.878	116.179	96.3633	94.8383
	139.467	133.992	109.743	92.1671	77.9134
	143.001	131.41	120.048	100.668	75.6519
	138.654	122.435	111.915	85.6295	81.4172
	111.784	128.151	124.634	86.336	90.1529
	137.415	139.854	140.367	111.531	110.633
