# Supplementary material for: Huntingtin recruits KIF1A to transport synaptic vesicle precursors along the mouse axon to support synaptic transmission and motor skill learning
Source: eLife. 2023 Jul 11;12:e81011. doi: 10.7554/eLife.81011 (PMC10365837; doi:10.7554/eLife.81011)
Supplement: Figure 4—figure supplement 1—source data 1. [file elife-81011-fig4-figsupp1-data1.xlsx]

## Sheet: Figure S4-Source data 1 - zones
	zone 1 - first 40 nm from the synaptic cleft			zone 2 - 40-80 nm from the synaptic cleft			zone 3 - 80-120 nm from the synaptic cleft
	Wild-type	HTT-SD		Wild-type	HTT-SD		Wild-type	HTT-SD
	0.00758938	0.0102822		0.0090228	0.0130981		0.0218567	0.0191087
	0.035861	0.022192		0.0486355	0.0267819		0.0114196	0.0374599
	0.3237	0.0281252		0.0224817	0.0396212		0.0520487	0.0493623
	0.00801697	0.006174		0.0104456	0.0101666		0.0227066	0.0096594
	0.0149315	0.0122334		0.0100509	0.0163331		0.0158758	0.0221729
	0.0218567	0.0405262		0.0109135	0.0445124		0.0139745	0.0457962
	0.0520487	0.0131533		0.0226228	0.0136817		0.0146567	0.0171459
	0.154261	0.0198928		0.0140435	0.0268488		0.0285177	0.0285825
	0.00952359	0.0121305		0.0107607	0.0168477		0.0181167	0.0186514
	0.0146567	0.00630344		0.020888	0.0131841		0.0125867	0.0208085
	0.014314	0.0145613		0.0388519	0.0184021		0.0316944	0.0215681
	0.0285177	0.0119512		0.0145687	0.0154811		0.0406238	0.0164902
	0.00654959	0.0126928		0.0125708	0.0211766		0.0208509	0.0217676
	0.119579	0.0122907		0.0173284	0.0120053		0.0161793	0.0138525
	0.00917134	0.00870556		0.0254037	0.0175077		0.0205899	0.0196764
	0.0140435	0.00887532		0.0111056	0.00765835		0.0330514	0.00928593
	0.0181167	0.00652413		0.0157018	0.0145496		0.0120774	0.0108658
	0.0156796	0.0122992		0.0251257	0.0148965		0.0174716	0.0219978
	0.117623	0.00983765		0.0250504	0.0165425		0.0285888	0.0220639
	0.00914482	0.0114817		0.0299405	0.0252838		0.0341209	0.0280827
	0.0145687	0.0169687		0.022122	0.0103289		0.0329931	0.0158801
	0.19707	0.0070366		0.0126228	0.0300095		0.0282132	0.0367862
	0.0156796	0.0207724		0.018679	0.0259459		0.0130292	0.0349867
	0.0285888	0.0170483		0.0229973	0.00958301		0.0244467	0.0148
	0.341288	0.00569548		0.0109676	0.0223299		0.0282281	0.0268785
	0.0126228	0.0178981		0.026261	0.0182196		0.0107554	0.0144042
	0.0130292	0.00957134		0.012835	0.0217337		0.0317315	0.016122
	0.0135172	0.0596859		0.0157994	0.0136127		0.014487	0.00652625
	0.0223692	0.00957134		0.0337761	0.00663766		0.0184668	0.0171522
	0.0133538	0.0182196		0.0163225	0.0115215		0.0380074	0.0224244
	0.018679	0.00669707		0.0233124	0.0151236		0.0182589	0.0178705
	0.0244467	0		0.0112944	0.0160361		0.0282398	0.0154536
	0.0144212	0.150174		0.0213114	0.0155819		0.0151904	0.0212329
	0.0963394	0.0163331		0.0118833	0.0168265		0.0298482	0.0130514
	0.00886895	0.0217337		0.0118154	0.0103575		0.0138026	0.023827
	0.0163225	0.0126833		0.0164106	0.0229167		0.0147809	0.0267268
	0.0182589	0.351944		0.024974	0.0229167		0.013966	0.0214673
	0.0213114	0.00669707		0.00936657	0.0244392		0.0264594	0.0159459
	0.0298482	0.0115215		0.00971458	0.0124594		0.0127066	0.0260307
	0.0176647	0.0171522		0.0209793	0.0262154		0.0127353	0.0270917
	0.0233124	0.0168265		0.0229899	0.0184891		0.0205305	0.0310344
	0.0282398	0.00569761		0.0108785	0.0222026		0.0262822	0.0106843
	0.00936657	0.0103575		0.0191395	0.00789177		0.0151236	0.0212594
	0.0264594	0.0130514		0.014383	0.0166833		0.0239692	0.0180551
	0.0755331	0.0212965		0.032297	0.0159735		0.0149899	0.018522
	0.00971458	0.0244392		0.0192509	0.0126387		0.0434185	0.0169379
	0.0092297	0.0260307		0.00926683	0.0145708		0.0214896	0.00761591
	0.0792445	0.0270917		0.0164445	0.00893368		0.0112552	0.039514
	0.0123915	0.0310344		0.0167013	0.0381559		0.0270907	0.0224933
	0.00920742	0.0166833		0.012696	0.0235257		0.0188902	0.024436
	0.0134812	0.0212594		0.0223989	0.0186578		0.0165644	0.0238016
	0.0089358	0.0100806		0.0159321	0.0169666		0.0313549	0.00804667
	0.0109973	0.0159735		0.0110122	0.0169252		0.0177315	0.0167342
	0.0273358	0.13487		0.0404848	0.00672678		0.0122292	0.0168244
	0.00700583	0.0110493		0.0130642	0.0121485		0.0425379	0.00590238
	0.0141517	0.0145708		0.018278	0.018227		0.0161559	0.0426153
	0.00957134	0.0119735		0.0165793	0.0060053		0.0224647	0.0184382
	0.00497506	0.0193994		0.0080541	0.0397771		0.023549	0.0267883
	0.0130037	0.00458037		0.0146843	0.0165167		0.0102133	0.0283363
	0.0130875	0.037183		0.0169453	0.0252138		0.0174228	0.0125772
	0.01974	0.0150069		0.0299427	0.0311692		0.0204382	0.0246525
	0.00922651	0.0225337		0.0129761	0.0127851		0.0351798	0.028905
	0.0201358	0.0302005		0.028052	0.023357		0.038053	0.0178939
	0.0177029	0.0124562		0.020488	0.0228021		0.0295628	0.0319225
	0.027583	0.0253082		0.0294175	0.0173602		0.0400318	0.0345336
	0.0119862	0.0166674		0.0164965	0.0274185		0.0169708	0.0385931
	0.00997983	0.0160233		0.0174122	0.0311204		0.0207522	0.0324191
	0.00707055	0.0220711		0.0078175	0.0304806		0.0105602	0.0271703
	0.0267034	0.027584		0.0347236	0.0239066		0.0470822	0.0149825
	0.00817824	0.0236127		0.0115586	0.0219289		0.0157284	0.0417909
	0.0101634	0.0157793		0.0193867	0.0197485		0.0249538	0.0221071
	0.00909601	0.0133358		0.0160212	0.0306164		0.0237156	0.0263618
	0.00840742	0.0123989		0.0145995	0.0195363		0.0212647	0.017392
	0.0173506	0.0288159		0.0282504	0.0256965		0.0323819	0.0348498
	0.0151713	0.0148817		0.0220509	0.0197602		0.0269835	0.0359947
	0.0129252	0.0203416		0.0218536	0.0283108		0.0236689	0.0298249
	0.0130334	0.015914		0.0188	0.0255512		0.0139034	0.0120923
	0.00677028	0.0242175		0.00975383	0.0201061		0.0238875	0.0132689
	0.0176488	0.0193687		0.0221008	0.0118483		0.0157613	0.0226037
	0.010244	0.0119172		0.0171321	0.0160658		0.0196689	0.0357326
	0.00703235	0.011461		0.0145804	0.0278949		0.0144148	0.0487416
	0.00882545	0.0135597		0.0127363	0.0322663		0.0176435	0.0109835
	0.00660583	0.0206461		0.0128371	0.0412053		0.0136021	0.0253623
	0.00961378	0.0210504		0.014192	0.0123809		0.0210546	0.0265177
	0.0125835	0.0344435		0.0178949	0.0183862		0.0238822	0.0111236
	0.0107204	0.0145358		0.016539	0.0223289		0.0305718	0.0423119
	0.0214981	0.0112891		0.0280986	0.0129146		0.023723	0.036053
	0.0155109	0.0140838		0.0217252	0.0342811		0.0412923	0.0225082
	0.0282047	0.00976551		0.0347363	0.0303193		0.0273273	0.0272392
	0.0135151	0.0252838		0.0206472	0.0208223		0.0140891	0.0157061
	0.00910344	0.0231002		0.0140689	0.0222589		0.0138939	0.015496
	0.0114217	0.0142355		0.0123225	0.0119268		0.0270652	0.0269634
	0.0180742	0.0154684		0.0235363	0.014453		0.019687	0.0198154
	0.00910662	0.00756179		0.013722	0.0244042		0.0211788	0.0218451
	0.00972519	0.00882651		0.0158631	0.0148318		0.0332477	0.0149369
	0.0179788	0.0184106		0.0251469	0.0179968		0.0155427	0.0215543
	0.00810609	0.011079		0.0119915	0.0173475		0.0156201	0.0288286
	0.00963076	0.0131682		0.0158207	0.0176955		0.0278992	0.0281241
	0.010504	0.0132032		0.0176583	0.0264668		0.0171077	0.0299108
	0.0078476	0.0137018		0.013088	0.0211533		0.0396137	0.0156414
	0.0168424	0.0180859		0.0251257	0.0261294		0.0236488	0.0323586
	0.0148976	0.0151682		0.0193719	0.0134408		0.026018	0.0234334
	0.00994588	0.0176244		0.0157994	0.0221464		0.0268456	0.0245644
	0.0175098	0.00911829		0.0204944	0.014783		0.0219809	0.0273008
	0.0179193	0.0159034		0.0218472	0.0180445		0.037862	0.0199788
	0.0194843	0.008835		0.0290599	0.0207628		0.0199766	0.02381
	0.0116541	0.0128955		0.0153538	0.0169772		0.0150026	0.032053
	0.0115172	0.015844		0.0141952	0.0183565		0.0230154	0.00722121
	0.0131374	0.0106419		0.0175926	0.0300774		0.0145655	0.0403819
	0.00947903	0.0129029		0.0114854	0.00641803		0.014835	0.0121867
	0.00646683	0.0245432		0.0122758	0.0332159		0.0195575	0.0213199
	0.00958513	0.0053602		0.0166419	0.00992572		0.0238069	0.0316244
	0.00889336	0.0265453		0.0148562	0.0174737		0.0353443	0.0176276
	0.0119713	0.00796922		0.0232445	0.0266451		0.0283894	0.0208467
	0.0146822	0.0119894		0.0224	0.0172636		0.0205888	0.0298334
	0.0144859	0.0204965		0.0208594	0.0160552		0.0409082	0.0205103
	0.0239236	0.0122812		0.0285931	0.0201878		0.0334886	0.0262217
	0.0192509	0.0117008		0.0268138	0.0166122		0.0147437	0.0126345
	0.00929442	0.0119491		0.0119289	0.0173655		0.0198748	0.019617
	0.0135183	0.0115384		0.0158185	0.0103894		0.0241347	0.027879
	0.0133411	0.0121708		0.0183809	0.0150875		0.0279703	0.0265612
	0.0116605	0.00627585		0.020401	0.0193528		0.0198376	0.0253209
	0.00793739	0.00898248		0.0140212	0.0193082		0.0315013	0.0413305
	0.0176817	0.014261		0.0257114	0.0221612		0.0306355	0.0258451
	0.0169273	0.0114292		0.0261071	0.0267172		0.0289453	0.0247851
	0.0168286	0.0170674		0.0206673	0.02134		0.0164053	0.0150398
	0.00799999	0.0195533		0.0118111	0.0173029		0.0373867	0.0201708
	0.0261177	0.0140223		0.0337145	0.0151077		0.0311108	0.0281135
	0.0180658	0.0102069		0.0233485	0.0177644		0.021444	0.0250132
	0.0129475	0.0137008		0.0192053	0.0261358		0.039045	0.0312127
	0.0166886	0.0151862		0.0272424	0.0187204		0.0338779	0.0118101
	0.0230249	0.0226949		0.0285018	0.0264063		0.0337718	0.0216265
	0.0225443	0.0122769		0.0293718	0.010226		0.0167819	0.0199766
	0.0192445	0.0203087		0.0274652	0.0218196		0.0118875	0.0219353
	0.00877559	0.0101125		0.0107183	0.0186833		0.0306578	0.0213135
	0.0185506	0.0222801		0.0261761	0.0178886		0.0232668	0.0195448
	0.0152445	0.0127766		0.0207066	0.0180467		0.0283257	0.0211225
	0.0196297	0.0162005		0.0275331	0.0191024		0.0100499	0.0229368
	0.00596498	0.0131713		0.00895277	0.0127002		0.0231713	0.0404997
	0.0144265	0.0175448		0.0186705	0.016		0.0295904	0.020017
	0.0223512	0.00720211		0.0266111	0.0386748		0.0212106	0.0201326
	0.016713	0.0116233		0.0186536	0.0136361		0.0176827	0.0230971
	0.28013	0.0333453		0.0097411	0.0156201		0.0413888	0.032766
	0.0213581	0.00827055		0.0292403	0.0211777		0.0270493	0.0254992
	0.0209761	0.0153432		0.0242175	0.0233782		0.0271405	0.0229453
	0.0148902	0.0165167		0.0213209	0.0219066		0.0265517	0.0195459
	0.013775	0.0155087		0.0194896	0.0143056		0.0206101	0.0276222
	0.0102525	0.0189485		0.0143819	0.0154769			0.0230111
		0.00940158			0.0170854			0.041758
		0.0100042			0.0161018			0.0357835
		0.013617			0.02861			0.0425474
		0.0147353			0.0384838			0.0348275
		0.0208414			0.0357061
		0.0246345			0.0252679
		0.0238684
		0.0175597
