# Supplementary material for: Huntingtin recruits KIF1A to transport synaptic vesicle precursors along the mouse axon to support synaptic transmission and motor skill learning
Source: eLife. 2023 Jul 11;12:e81011. doi: 10.7554/eLife.81011 (PMC10365837; doi:10.7554/eLife.81011)
Supplement: Figure 4—figure supplement 1—source data 2. [file elife-81011-fig4-figsupp1-data2.xlsx]

## Sheet: Figure S4-Source data 2 -syn SA
	Wild-type	HTT-SA
	WT	HTT-SA
	13.1789	15.6891
	8.15836	11.2962
	16.9443	11.2962
	13.8065	20.0821
	13.1789	16.3167
	6.90323	10.0411
	18.1994	16.3167
	19.4546	10.6686
	11.9238	10.6686
	10.6686	11.9238
	13.1789	12.5513
	16.9443	13.8065
	21.3373	20.0821
	18.1994	13.1789
	15.0616	12.5513
	9.41349	14.434
	16.3167	23.22
	13.8065	11.9238
	16.3167	20.0821
	18.1994	20.7097
	15.0616	17.5719
	17.5719	16.9443
	15.6891	16.9443
	19.4546	15.0616
	11.9238	20.7097
	16.3167	13.8065
	12.5513	9.41349
	11.9238	15.6891
	16.9443	15.0616
	25.7302	17.5719
	22.5924	13.1789
	16.3167	14.434
	15.6892	14.434
	19.4546	16.3167
	15.0616	13.1789
	14.434	9.41349
	10.0411	18.827
	13.8065	17.5719
	13.1789	16.9443
	18.1994	20.0821
	15.0616	20.0821
	13.8065	17.5719
	19.4546	14.434
	20.0821	19.4546
	20.7097	16.3167
	17.5719	17.5719
	21.9648	15.6891
	14.434	14.434
	19.4546	13.8065
	15.0616	15.6891
	10.6686	13.1789
	22.5924	11.2962
	16.9443	10.0411
	15.0616	14.434
	20.0821	20.7097
	20.0821	13.1789
	19.4546	25.7302
	21.9648	30.1232
	21.3372	19.4546
	16.3167	18.827
	21.3372	22.5924
	10.6686	17.5719
	15.0616	16.3167
	20.7097	16.9443
	3.13783	19.4546
	19.4546	19.4546
	13.8065	19.4546
	9.41349	27.6129
	17.5719	26.3578
	11.9238	25.7302
	20.7097	23.8475
	21.3372	21.9648
		25.7302
		19.4546
		23.8475
		23.22
		28.2405
