# Supplementary material for: Huntingtin recruits KIF1A to transport synaptic vesicle precursors along the mouse axon to support synaptic transmission and motor skill learning
Source: eLife. 2023 Jul 11;12:e81011. doi: 10.7554/eLife.81011 (PMC10365837; doi:10.7554/eLife.81011)
Supplement: Figure 4—figure supplement 1—source data 3. [file elife-81011-fig4-figsupp1-data3.xlsx]

## Sheet: Figure S3-Source data3 -ves SA
	Wild-type	HTT-SA
	21	18
	23	10
	13	2
	12	3
	7	13
	10	4
	10	4
	7	3
	7	2
	9	58
	12	5
	8	5
	16	55
	43	19
	12	6
	13	3
	21	31
	7	5
	13	18
	50	5
	13	4
	6	9
	15	9
	14	6
	13	13
	4	27
	25	6
	12	4
	11	3
	66	3
	27	10
	26	21
	16	3
	24	4
	6	10
	17	12
	56	7
	15	51
	28	22
	36	13
	3	8
	96	4
	7	4
	21	7
	9	6
	7	12
	19	6
	8	28
	7	6
	30	6
	21	8
	18	11
	51	4
	10	3
	21	9
	31	17
	12	18
	38	16
	5	4
	4	3
	8	44
	30	3
	8	14
	4	11
	10	10
	6	3
	11	5
	32	9
	18	6
	5	25
	5	21
	11	3
	12	5
	13	6
	4	18
	20	15
	11	6
	10	28
	20	10
	9	3
	14	4
	12	64
	26	10
	13	24
	32	6
	25	56
	27	4
	17	13
	4	26
	9	7
	6	21
	28	7
	8	18
	13	9
	7	25
	8	5
	3	20
	3	25
	27	7
	11	8
	25	12
	14	7
	20	50
	23	10
	3	18
	22	14
	15	15
	8	15
	8	8
	21	19
	11	27
	20	14
	37	35
	11	6
	6	5
	9	5
	24	8
	17	35
	8	31
	13	18
	18	4
	7	10
	39	3
	24	63
	7	18
	71	48
	7	6
	9	7
	5	28
	53	3
	13	15
	16	15
	23	8
	29	8
	63	6
	9	41
	71	11
	30	25
	18	39
	3	14
	11	12
	18	13
	7	16
	15
	36
	13
	16
	53
	53
	10
	32
	18
	35
	33
	4
	13
	17
	39
	13
