# Supplementary material for: Huntingtin recruits KIF1A to transport synaptic vesicle precursors along the mouse axon to support synaptic transmission and motor skill learning
Source: eLife. 2023 Jul 11;12:e81011. doi: 10.7554/eLife.81011 (PMC10365837; doi:10.7554/eLife.81011)
Supplement: Figure 4—source data 1. [file elife-81011-fig4-data1.xlsx]

## Sheet: Figure 4-Number synapses
	Wild-type	HTT-SD
	24.4751	13.3203
	25.7302	14.322
	23.22	13.0297
	25.7302	20.3778
	15.0616	14.5547
	23.8475	16.7305
	31.3783	29.0818
	26.3578	28.2405
	30.1232	19.2605
	30.1379	21.9648
	29.4956	29.3629
	27.6129	22.5924
	21.3373	20.8229
	29.4956	21.47
	25.1027	17.9108
	16.3167	25.7302
	24.4751	24.4751
	17.5719	26.9853
	18.827	25.7302
	25.1027	20.7097
	17.5719	18.827
	26.9853	24.6457
	28.868	23.6678
	14.434	22.5924
	13.8065	12.7269
	20.0821	23.8767
	20.7097	6.90323
	18.96	10.0411
	18.1994	11.9238
	22.5924	19.4546
	20.0821	18.827
	20.0821	13.1789
	19.4546	18.1994
	25.1027	21.9648
	15.0616	21.3373
	18.827	17.5719
	16.3167	13.1789
	9.41349	13.8065
	12.5513	13.8065
	21.3373	15.0616
	18.1994	6.90323
	20.0821	25.7302
	18.8454	24.4751
	17.5719	16.3167
	26.9853	15.0616
	16.3167	6.90323
	23.8475	16.3167
	25.7302	16.3167
	23.8475	8.78593
	10.0411	16.9443
	8.78593	14.434
	11.9238	21.9648
	12.5513	21.3373
	14.0283	17.5719
	12.5513	27.6129
	13.1789	20.0821
	6.90323	16.3167
	16.3167	24.4751
	10.6686	20.7097
	11.9238	17.5719
	6.27566	26.3578
	12.5513	28.868
	10.0411	16.3167
	10.6686	18.827
	8.15836	20.0821
	14.434	25.1027
	13.8065	14.434
	9.41349	16.3167
	11.9238	26.9853
	16.3167	9.41349
	13.8065	11.9238
	11.9238	26.9853
	13.1789	19.4546
	17.5719	15.0616
