# Supplementary material for: Huntingtin recruits KIF1A to transport synaptic vesicle precursors along the mouse axon to support synaptic transmission and motor skill learning
Source: eLife. 2023 Jul 11;12:e81011. doi: 10.7554/eLife.81011 (PMC10365837; doi:10.7554/eLife.81011)
Supplement: Figure 4—source data 2. [file elife-81011-fig4-data2.xlsx]

## Sheet: Figure 4-Number synap. vesicles
	Wild-type	HTT-SD
	21	6
	23	28
	13	46
	12	4
	7	27
	10	39
	10	9
	7	19
	7	7
	9	16
	12	8
	8	18
	16	8
	43	6
	12	11
	13	13
	21	8
	7	28
	13	30
	13	4
	6	17
	15	18
	14	37
	13	32
	4	20
	25	2
	12	17
	11	37
	27	13
	26	28
	16	33
	24	14
	6	36
	17	24
	15	6
	28	16
	36	5
	3	37
	7	42
	21	34
	9	24
	7	18
	19	5
	8	33
	7	32
	30	18
	21	30
	18	10
	10	8
	21	10
	31	20
	12	13
	38	16
	5	17
	4	12
	8	8
	30	4
	8	15
	4	9
	10	9
	6	20
	11	35
	32	10
	18	13
	5	17
	5	9
	11	5
	12	30
	13	50
	4	14
	20	51
	11	56
	10	8
	20	42
	9	21
	14	22
	12	47
	26	10
	13	24
	32	10
	25	39
	27	15
	17	12
	4	8
	9	22
	6	43
	28	39
	8	20
	13	59
	7	33
	8	26
	3	30
	3	27
	27	24
	11	14
	25	7
	14	19
	20	18
	23	8
	3	6
	22	8
	15	41
	8	61
	8	20
	21	33
	11	46
	20	15
	37	25
	11	27
	6	7
	9	39
	24	28
	17	31
	8	10
	13	9
	18	13
	7	46
	39	14
	24	47
	7	22
	7	45
	9	26
	5	17
	13	8
	16	10
	23	9
	29	16
	9	27
	30	25
	18	8
	3	25
	11	27
	18	20
	7	12
	15	48
	36	24
	13	21
	16	27
	10	26
	32	25
	18	12
	35	10
	33	12
	4	6
	13	5
	17	23
	39	15
	13	41
	8	26
	4	10
	10	51
	38	33
	12	32
	4	58
	13	8
	23	34
	33	30
	9	27
	4	54
	11	25
	8	52
	20	33
	29	24
	11	39
	13	42
	8	45
	17	18
	15	25
	7	15
	19	56
	37	19
	19
	8
	10
	20
	24
	34
	10
	3
	19
	9
	11
	18
	26
	4
	12
	32
	26
	12
	6
	5
	20
	6
	9
	16
	8
	6
	9
	21
	4
	3
	9
	17
	12
	12
	17
	17
	6
	8
	19
	15
	28
	11
	5
	11
	4
	4
	9
	41
	30
	5
	14
	6
	6
	14
	6
	5
	32
	31
	39
	18
	15
	16
	17
	18
	15
	21
	27
	10
	12
	25
	27
	9
	12
	8
	17
	14
	9
	6
	3
	15
	23
	8
