# Supplementary material for: Huntingtin recruits KIF1A to transport synaptic vesicle precursors along the mouse axon to support synaptic transmission and motor skill learning
Source: eLife. 2023 Jul 11;12:e81011. doi: 10.7554/eLife.81011 (PMC10365837; doi:10.7554/eLife.81011)
Supplement: Figure 4—source data 3. [file elife-81011-fig4-data3.xlsx]

## Sheet: Figure 4-Source data 3 - Size
	WT	HTT-SD
	0.4077	0.1434
	0.4817	0.2924
	0.1463	0.6373
	0.4961	0.0577
	0.2264	0.1772
	0.2327	0.5302
	0.1133	0.1264
	0.1621	0.1548
	0.3126	0.0959
	0.3095	0.155
	0.3685	0.0927
	0.139	0.2107
	0.1769	0.1008
	0.2442	0.0758
	0.1716	0.1107
	0.2787	0.0662
	0.1595	0.3301
	0.1501	0.1542
	0.2343	0.048
	0.1698	0.1565
	0.1137	0.2011
	0.3775	0.3003
	0.4507	0.1759
	0.2925	0.0984
	0.4705	0.2071
	0.2553	0.2633
	0.2102	0.1281
	0.2496	0.1238
	0.4	0.106
	0.1512	0.0647
	0.3266	0.1295
	0.1539	0.1356
	0.1644	0.0271
	0.1999	0.0899
	0.2386	0.0506
	0.1231	0.2381
	0.1557	0.1144
	0.2945	0.1012
	0.3761	0.0523
	0.1429	0.1146
	0.1313	0.1205
	0.0955	0.1865
	0.1962	0.232
	0.1581	0.1037
	0.078	0.0601
	0.1557	0.0817
	0.4438	0.1789
	0.1247	0.1415
	0.094	0.2774
	0.0951	0.1515
	0.3376	0.1361
	0.1241	0.1528
	0.2169	0.1135
	0.0961	0.0039
	0.1167	0.105
	0.3811	0.1386
	0.1861	0.366
	0.1544	0.3073
	0.2368	0.1629
	0.214	0.2174
	0.4277	0.2618
	0.1701	0.0967
	0.1149	0.3815
	0.2511	0.0925
	0.1326	0.087
	0.2477	0.4734
	0.1654	0.1523
	0.0856	0.2962
	0.0785	0.2512
	0.165	0.0875
	0.5953	0.218
	0.2267	0.2735
	0.5645	0.1857
	0.3346	0.2945
	0.4382	0.2481
	0.1222	0.3879
	0.2686	0.1856
	0.2912	0.2625
	0.4722	0.1661
	0.0929	0.4245
	0.2981	0.2426
	0.2213	0.2567
	0.1507	0.1017
	0.2804	0.1371
	0.3837	0.3655
	0.1874	0.5962
	0.2069	0.0987
	0.2012	0.0903
	0.245	0.1333
	0.1048	0.1523
	0.2259	0.6692
	0.3363	0.2685
	0.2673	0.4635
	0.1931	0.4511
	0.3903	0.1878
	0.178	0.3417
	0.2409	0.1703
	0.2008	0.4527
	0.3781	0.2774
	0.3318	0.2115
	0.0873	0.7093
	0.1832	0.2821
	0.3637	0.2137
	0.15	0.3371
	0.1763	0.3625
	0.2936	0.309
	0.1092	0.4982
	0.3932	0.352
	0.543	0.357
	0.3523	0.3505
	0.2632	0.7133
	0.2383	0.2103
	0.1724	0.2023
	0.1649	0.3392
	0.1777	0.2472
	0.4482	0.3895
	0.1562	0.1209
	0.2783	0.4337
	0.312	0.4489
	0.1514	0.1113
	0.0885	0.5201
	0.1602	0.1756
	0.4684	0.3237
	0.3089	0.4606
	0.5315	0.1794
	0.0814	0.2058
	0.1483	0.0998
	0.5285	0.6225
	0.121	0.3435
	0.1411	0.1334
	0.3526	0.1457
	0.315	0.507
	0.0873	0.2941
	0.5787	0.2373
	0.496	0.1242
	0.5562	0.2529
	0.3567	0.2023
	0.6808	0.5383
	0.3121	0.2698
	0.4265	0.2541
	0.4129	0.1963
	0.2268	0.203
	0.4645	0.4034
	0.0453	0.1895
	0.1271	0.26
	0.2839	0.1437
	0.526	0.2178
	0.4502	0.4373
	0.1674	0.2795
	0.4781	0.2401
	0.2225	0.1072
	0.1517	0.1143
	0.2801	0.2211
	0.2886	0.1489
	0.1693	0.1199
	0.3951	0.1988
	0.2875	0.25
	0.3055	0.4301
		0.3422
		0.3232
		0.2518
