# Supplementary material for: Huntingtin recruits KIF1A to transport synaptic vesicle precursors along the mouse axon to support synaptic transmission and motor skill learning
Source: eLife. 2023 Jul 11;12:e81011. doi: 10.7554/eLife.81011 (PMC10365837; doi:10.7554/eLife.81011)
Supplement: Figure 4—source data 4. [file elife-81011-fig4-data4.xlsx]

## Sheet: Figure 4-Source data 4 - densit
	Wild-type	HTT-SD
	19.6236	41.8468
	110.024	95.7586
	27.3421	72.1827
	20.1574	69.3289
	167.88	152.385
	51.5784	73.5554
	35.3007	71.2301
	80.2186	122.722
	73.5742	72.9571
	171.262	103.196
	89.564	86.3106
	64.7614	85.4437
	22.6055	79.3886
	45.0389	145.067
	116.532	117.486
	104.048	120.808
	81.509	84.8208
	53.2957	194.525
	72.5589	83.2506
	88.3567	108.596
	61.5393	89.5153
	50.3271	123.198
	159.753	113.678
	126.497	20.3248
	112.646	82.0847
	74.4107	140.535
	47.5775	101.455
	80.1297	226.204
	85.0091	311.175
	66.1437	216.55
	58.177	278.022
	58.4896	176.968
	66.9256	221.713
	90.0469	178.04
	108.984	98.7346
	32.5023	155.419
	77.0794	297.264
	108.668	237.159
	69.1241	343.909
	83.9738	287.896
	45.6974	265.493
	52.3658	96.5013
	101.945	129.295
	37.9577	96.4038
	115.404	133.007
	102.735	122.422
	164.492	111.794
	64.1796	91.8473
	63.7989	57.6758
	94.6329	112.186
	62.1959	88.1831
	32.222	52.3521
	13.8329	35.2502
	93.6363	3889.49
	145.62	85.7235
	31.4845	64.9399
	64.4978	54.6512
	110.108	113.883
	71.7874	61.3931
	70.0856	78.214
	163.66	34.3774
	64.6858	51.7323
	130.527	20.9702
	151.32	108.159
	22.6244	103.429
	109.018	103.507
	278.061	105.071
	186.823	91.1569
	63.661	99.5275
	72.7201	91.4306
	231.835	114.657
	44.1056	98.7272
	127.558	107.698
	47.8158	162.992
	168.863	96.7358
	139.139	90.228
	141.483	113.151
	116.772	285.691
	173.653	162.527
	161.505	136.619
	90.5816	107.169
	153.624	97.4049
	112.774	117.961
	128.378	72.9592
	99.0469	32.8334
	106.725	310.307
	140.138	60.8196
	139.153	55.3637
	244.879	172.549
	114.467	98.4939
	146.073	61.2704
	83.2648	96.8502
	179.578	21.5753
	160.499	113.061
	184.48	175.717
	129.249	93.6449
	107.914	46.362
	74.6977	46.9897
	87.2679	75.1125
	141.645	108.141
	126.053	127.644
	76.4383	177.633
	123.727	191.428
	86.6821	116.978
	119.122	154.266
	98.7743	91.0261
	82.4537	77.6776
	101.724	78.287
	79.1869	252.87
	31.2271	117.659
	197.539	128.401
	58.749	110.752
	63.8126	118.887
	90.9891	74.1555
	106.893	165.086
	120.475	76.8656
	96.0292	128.377
	100.594	115.788
	35.253	117.58
	33.0162	124.748
	79.0812	71.8698
	43.6918	80.7568
	19.2144	119.622
	132.745	67.9703
	56.4414	102.047
	86.0462	55.7548
	94.3883	116.64
	194.878	100.218
	49.5949	62.6485
	63.7672	43.6672
	133.299	89.9376
	44.4389	102.981
	80.1437	43.3958
	55.2921	146.232
	62.499	164.379
	70.1128	161.005
	50.4677	102.802
	22.0337	148.275
	51.2596	50.1552
	39.8632	88.9624
	43.5931	27.5441
	66.1506	96.7953
	45.2062	88.6638
	78.6598	19.8296
	42.2618	42.2074
	47.5306	157.702
	59.9719	139.181
	53.779	151.499
	158.969	105.18
	53.9211	53.6701
	52.7203	104.139
	60.6861	251.913
	48.5068	96.2548
	59.051	176.415
	15.1871	67.1431
	31.303	75.0758
	49.1041	65.3942
		184.021
		32.5539
		137.336
		80.4562
		67.5255
