# Supplementary material for: Huntingtin recruits KIF1A to transport synaptic vesicle precursors along the mouse axon to support synaptic transmission and motor skill learning
Source: eLife. 2023 Jul 11;12:e81011. doi: 10.7554/eLife.81011 (PMC10365837; doi:10.7554/eLife.81011)
Supplement: Figure 4—source data 5. [file elife-81011-fig4-data5.xlsx]

## Sheet: Figure 4-Source data 5 - zones
	zone 1 - first 40 nm from the synaptic cleft			zone 2 - 40-80 nm from the synaptic cleft			zone 3 - 80-120 nm from the synaptic cleft
	Wild-type	HTT-SD		Wild-type	HTT-SD		Wild-type	HTT-SD
	249.471	291.766		200.917	152.694		45.7525	313.993
	131.763	315.429		221.661	261.37		87.5686	213.562
	223.084	213.332		143.928	227.151		76.851	202.584
	24.7142	161.97		266.884	196.723		264.24	103.526
	124.735	408.717		382.936	183.676		125.978	270.6
	66.9723	148.052		99.4934	202.191		0	152.851
	137.257	304.106		183.259	365.452		136.456	58.3231
	172.915	251.347		265.219	186.228		175.329	174.932
	12.9651	412.185		71.2074	178.066		55.1977	160.846
	210.005	317.287		185.861	75.8491		317.795	192.229
	272.912	206.026		143.623	163.025		31.5513	139.094
	558.892	251.021		154.432	129.189		123.08	242.569
	140.264	315.139		274.562	141.666		479.596	275.639
	610.725	244.087		318.198	333.186		123.615	288.756
	16.7254	689.215		346.253	228.471		194.27	203.29
	436.141	563.36		275.551	522.306		181.535	323.069
	356.037	459.831		90.045	274.922		82.799	368.129
	220.791	243.919		254.747	268.519		171.707	227.295
	127.555	101.65		198.999	302.252		244.851	271.938
	25.5052	348.38		279.437	237.306		263.768	213.654
	874.813	589.321		300.596	484.079		181.856	62.972
	480.483	568.457		135.612	233.259		106.333	244.657
	15.223	240.704		79.2218	269.793		153.502	200.076
	191.332	293.285		214.144	521.757		122.716	202.703
	104.936	1053.47		260.9	582.178		283.406	520.863
	5.86016	893.949		273.532	384.202		278.929	416.544
	475.331	731.35		114.238	414.104		126.058	372.162
	307.004	201.053		311.648	293.843		276.11	612.909
	369.898	522.393		126.587	602.622		108.302	349.809
	223.522	109.772		177.64	1301.92		131.553	445.943
	149.77	895.914		61.265	462.853		109.536	167.874
	214.144	19.9769		171.582	623.595		106.233	452.97
	163.622	306.126		177.079	385.061		263.324	282.581
	346.712	276.069		140.77	416.01		167.514	229.86
	10.38	551.908		84.1519	289.644		217.35	167.877
	338.259	5.68272		253.907	261.818		135.31	112.247
	122.53	1194.55		182.809	130.909		143.205	139.747
	164.304	173.589		200.208	163.671		188.969	250.849
	46.9233	174.904		106.763	80.2607		236.097	192.081
	134.011	118.86		205.876	76.2912		157.044	221.47
	169.83	1228.59		238.33	162.258		243.54	193.334
	257.373	289.644		304.482	270.238		342.437	280.785
	106.233	459.719		367.698	0		264.488	188.152
	427.051	46.956		104.496	179.821		0	55.3859
	113.381	81.8356		139.053	187.812		200.135	53.9899
	66.1962	0		185.776	237.366		184.253	177.117
	308.814	110.735		103.891	205.891		139.602	131.304
	216.692	96.6668		215.823	111.936		88.8482	101.23
	25.2384	0		182.431	78.6248		147.652	222.288
	322.802	188.152		419.129	170.027		423.501	122.769
	434.432	297.601		315.06	53.5969		120.741	126.042
	296.711	250.415		178.58	176.818		350.823	248.55
	223.819	22.2437		251.066	295.418		169.19	239.031
	272.793	181.007		272.425	148.659		245.315	178.313
	109.746	205.891		74.1018	0		47.0169	169.423
	142.738	0		153.09	109.727		0	211.192
	282.651	154.644		273.553	166.52		178.057	271.177
	313.436	0		180.949	251.401		169.858	37.3297
	201.003	53.7881		372.481	242.179		293.736	247.033
	76.9012	199.908		136.2	118.983		57.3961	159.018
	229.226	133.134		177.04	128.332		97.8561	243.383
	101.317	165.56		300.574	234.648		312.679	69.1922
	216.767	240.844		385.323	214.069		105.117	55.885
	248.314	39.5129		213.889	43.8556		236.784	187.955
	56.4879	0		146.427	57.6031		224.821	144.786
	108.763	62.409		203.96	328.245		176.774	155.468
	250.288	45.3082		363.713	192.8		240.938	123.384
	100.202	0		229.724	262.462		378.781	147.22
	424.295	127.05		383.755	125.488		254.874	200.234
	411.932	126.748		345.587	182.408		317.897	263.215
	489.103	74.9862		519.094	101.273		160.296	135.703
	196.785	80.6522		206.327	228.636		168.665	151.735
	549.692	104.109		312.086	51.1867		282.158	114.995
	356.828	0		205.487	77.8316		308.814	86.0836
	288.174	245.801		106.193	151.82		296.477	111.128
	131.828	0		272.098	70.6443		295.746	167.645
	77.3683	41.2925		137.277	156.549		71.9247	165.395
	230.178	0		265.958	99.4724		293.04	150.728
	0	83.9121		307.571	84.4006		253.787	221.203
	113.322	87.2525		90.4946	124.488		254.208	111.943
	195.236	0		233.48	143.395		208.119	225.68
	284.4	242.176		137.171	185.953		56.6782	182.091
	226.617	237.525		157.031	169.881		220.554	157.714
	151.381	116.132		77.8991	323.079		189.982	150.842
	104.017	275.183		70.4621	108.777		209.361	179.798
	158.938	265.743		391.172	313.495		228.969	189.072
	93.28	142.007		362.78	77.4319		337.225	305.106
	279.094	102.401		142.356	262.535		145.306	177.713
	128.942	276.857		92.0591	230.876		219.561	293.694
	106.365	216.448		259.095	96.0511		283.907	191.009
	73.9913	70.2468		145.298	269.556		287.897	322.664
	219.697	129.296		213.236	251.535		110.843	296.699
	262.657	264.488		405.761	207.569		203.18	252.33
	55.3273	0		84.9751	286.836		236.086	274.662
	109.81	54.3166		218.627	202.268		120.309	200.846
	0	270.782		189.118	166.696		64.3389	231.972
	222.485	379.704		238.598	172.936		128.04	138.751
	246.728	151.479		166.785	113.023		179.217	142.227
	207.668	145.966		316.042	113.35		233.813	100.298
	190.404	0		113.261	283.644		100.975	127.866
	127.428	197.783		229.217	114.813		211.427	247.23
	59.3739	56.7396		278.599	223.2		76.8698	298.719
	268.5	219.339		206.485	90.3082		0	244.256
	201.088	62.8795		126.587	135.29		227.47	146.516
	228.444	113.186		195.175	443.347		211.294	150.16
	167.417	77.5466		45.7725	144.489		150.175	125.997
	102.647	189.346		206.47	58.9026		133.31	187.19
	0	93.9682		195.391	163.43		304.145	276.962
	173.653	310.008		211.339	299.228		68.6554	321.926
	76.1187	122.233		170.527	155.811		67.4082	164.113
	210.992	186.56		174.134	301.061		51.1312	187.618
	309.27	113.014		244.382	302.245		126.014	158.106
	104.328	125.483		240.357	286.144		311.225	283.647
	112.443	166.814		201.936	262.713		105.673	143.908
	167.066	390.31		215.104	173.776		145.71	268.156
	204.329	325.702		178.572	249.141		122.225	48.7559
	138.065	512.786		47.94	49.5349		298.61	190.682
	125.399	167.377		104.921	240.787		67.8254	158.297
	259.728	260		111.883	172.756		100.63	305.858
	0	164.328		83.83	192.504		41.4341	143.477
	295.896	159.341		126.434	265.12		107.257	150.595
	299.825	0		163.213	206.689		151.228	197.465
	85.7599	70.1214		98.0342	258.957		158.724	96.7809
	125.986	174.991		213.962	135.371		130.567	116.076
	113.111	175.774		233.36	112.287		172.739	121.04
	236.305	306.854		191.519	328.022		182.868	132.981
	59.4226	285.261		145.157	288.969		80.2425	247.883
	500.001	587.839		169.332	132.383		96.4294	213.421
	114.864	291.954		118.643	112.585		233.165	239.873
	276.767	131.699		299.805	191.309		51.2229	288.344
	77.2352	176.251		156.207	160.253		147.589	84.6735
	299.606	407.269		110.122	227.218		148.052	46.2396
	130.294	196.96		210.513	391.16		178.764	250.292
	266.143	98.888		136.185	229.152		252.366	91.1774
	207.851	89.7663		145.639	267.619		130.473	140.756
	341.858	391.339		0	111.803		128.939	255.822
	107.813	123.453		114.608	110.824		176.518	189.371
	131.194	151.845		193.175	261.748		298.512	174.392
	152.83	227.988		145.28	157.477		215.784	172.841
	167.645	0		111.697	312.5		135.179	149.873
	277.267	0		214.241	103.427		141.439	248.353
	178.962	179.935		112.735	366.675		56.5523	346.365
	239.335	362.733		53.6091	192.06		144.967	61.0389
	3.56977	325.877		410.631	283.317		110.909	156.868
	140.462	302.724		136.798	171.099		0	130.746
	143.02	322.399		165.17	273.89		37.6624	153.485
	201.475	316.647		375.218	349.515		97.04	253.419
	290.38	212.73		153.928	64.6124			217.286
	97.5371	199.915		139.063	58.5295			95.7899
		293.751			248.419			195.621
		203.593			69.9055			117.516
		287.889			259.85			200.99
		243.561			224.052
		251.378			197.88
		56.9487
