# Supplementary material for: Huntingtin recruits KIF1A to transport synaptic vesicle precursors along the mouse axon to support synaptic transmission and motor skill learning
Source: eLife. 2023 Jul 11;12:e81011. doi: 10.7554/eLife.81011 (PMC10365837; doi:10.7554/eLife.81011)
Supplement: Figure 5—source data 1. [file elife-81011-fig5-data1.xlsx]

## Sheet: Figure 5c-Percentage coloc
	Wild-type	HTT-SD
	0	25
	19.0476	92.3077
	14.8148	19.0476
	19.0476	0
	13.3333	20.5128
	0	66.6667
	41.0256	22.2222
	25	0
	66.6667	14.8148
	44.4444	47.0588
	53.3333	29.6296
	53.3333	85.7143
	14.0351	34.4086
	57.1429	0
	0	19.0476
	44.4444	26.6667
	33.3333	42.4242
	10.2564	112.821
	36.3636	0
	55.5556	51.2821
	22.2222	33.3333
	100	0
	66.6667	61.5385
	35.5556	60.6061
	36.3636	36.3636
	0	26.6667
	0	38.0952
	0	112.821
	26.6667	0
	0	14.8148
	0	36.3636
	36.3636	66.6667
	44.4444	0
	0	47.619
	0	0
	0	0
	36.3636	0
	44.4444	66.6667
	0	50
	19.0476	66.6667
	22.2222	66.6667
	29.6296	14.8148
	38.0952	29.6296
	19.0476	84.8485
	28.5714	52.1739
	0	35.0877
	0	33.3333
	0	38.0952
	42.1053	60
	0	80
	0	53.3333
	20.202	109.091
	66.6667	84.8485
	66.6667	30.303
	66.6667	0
	15.6863	0
	0	0
	28.5714	77.7778
	77.7778	10.2564
	26.6667	16.6667
	62.7451	9.1954
