# Supplementary material for: Huntingtin recruits KIF1A to transport synaptic vesicle precursors along the mouse axon to support synaptic transmission and motor skill learning
Source: eLife. 2023 Jul 11;12:e81011. doi: 10.7554/eLife.81011 (PMC10365837; doi:10.7554/eLife.81011)
Supplement: Figure 5—source data 3. [file elife-81011-fig5-data3.xlsx]

## Sheet: Figure 5e-KIF1A level vesicles
	Wild-type	HTT-SD
	0.644939	1.04736
	0.689402	1.22043
	0.488282	1.79638
	0.638502	0.807699
	0.686665	1.03377
	0.547001	0.504709
	-2.391	-1.624
		-1.607
	-1.185	-0.267
		-0.793
	-0.522
		-3.581
	-1.21	-1.547
	-1.071
		-1.788
	-0.985	-1.017
		-0.565
	-0.893
	-0.228	-0.195
	-0.393
	-0.319	-0.914
	-3.247
	-0.794
	-0.427	-0.167
	-5.05	-4.547
	-2.187
	-0.139
	-0.863
	-3.342
	-1.583
	-2.679
	-4.342	-1.702
		-1.79
		-1.067
		-0.937
	-3.304
	-3.301	-1.769
	-1.662
		-1.183
		-2.364
	-2.314
		-1.774
	-1.715	-1.731
	-1.692
	-1.652
	-4.114	-0.805
		-2.602
	-3.367
		-2.219
		-0.773
	-0.425	-0.786
		-0.983
		-1.351
		-2.537
		-2.804
		-2.592
	-0.206	-0.618
		-3.088
		-2.438
	-0.736	-3.483
	-0.566
	-0.382
		-5.252
	-3.765
	-3.135
	-1.946
	-2.519
	-0.495
	-0.472	-0.477
		-0.581
		-0.278
	-0.141	-0.585
	-2.362
	-1.84	-2.45
	-1.013
	-1.918
	-0.254
	-0.861	-1.48
	-0.76	-0.607
	-0.8
		-2.169
		-0.277
	-0.549
	-1.234
	-0.536
	-0.549
	-1.859	-1.913
	-3.157	-1.267
		-1.816
	-0.251	-2.87
	-2.411	-1.089
	-0.119	-1.421
		-3.355
		-4.593
	-2.362	-2.191
	-1.953
	-1.639
		-0.565
	-1.394	-2.486
	-4.52	-3.08
		-0.321
	-0.548
	-3.044
		-6.43
	-1.444	-3.062
	-1.005	-3.656
	-2.222	-1.227
	-1.092
	-1.756
	-1.192
	-1.444	-0.595
		-0.899
	-2.649
		-1.837
	-0.441	-2.403
	-2.322	-1.03
		-1.96
	-2.064
		-3.965
	-1.681	-0.626
	-0.511	-0.544
	-1.116
	-1.858
		-0.9
		-0.141
	-1.339	-2.635
	-2.41	-3.634
	-0.736
		-0.351
		-0.714
	-1.841	-0.705
	-1.626
	-4.531	-0.878
		-0.151
	-2.163
	-4.566
	-4.291	-0.329
		-2.24
		-1.726
	-1.693	-1.617
	-0.919	-1.715
	-1.631
	-1.726	-0.17
	-2.418	-0.897
		-1.541
		-1.412
	-2.128	-3.228
		-1.271
		-1.83
	-1.658	-3.395
		-0.466
	-1.207	-0.855
	-1.119	-1.69
	-2.264
	-1.039
	-0.404	-0.496
		-0.829
		-1.017
	-1.269	-1.62
		-1.198
	-0.273	-1.405
	-1.11
	-1.481	-0.521
		-1.422
	-0.873
		-0.719
	-0.141	-1.135
		-2.156
	-0.923
		-2.438
	-1.149	-2.965
		-1.229
		-0.149
	-2.818
	-1.59
		-1.262
	-0.904	-2.591
	-5.271
	-1.858	-3.157
	-0.323
		-2.087
	-1.42	-0.977
	-1.479	-1.688
	-1.721
		-2.674
	-1.618	-1.693
		-0.555
	-0.77	-1.037
	-1.085	-1.381
	-0.551	-0.933
	-1.74	-1.925
		-1.379
		-1.602
	-2.706	-1.072
	-2.941	-1.843
	-2.362
	-1.846	-1.793
	-0.683	-0.858
	-0.835
		-0.24
	-3.131	-1.006
		-0.958
		-0.576
		-1.218
	-3.147
		-4.227
	-1.138	-0.824
	-1	-1.011
	-1.028	-2.117
	-3.2	-0.251
	-1.77	-0.181
	-3.011	-1.05
	-0.267
	-1.253	-0.638
	-1.383
	-1.672	-1.671
	-2.87	-4.353
	-3.167	-0.804
	-0.94
	-0.739	-0.134
		-0.659
		-3.432
	-1.565	-1.785
		-2.286
	-1.922	-0.178
	-0.456	-0.892
	-0.435
		-1.549
		-1.435
	-3.136	-2.758
	-2.109	-0.228
	-2.523
	-2.959	-3.833
	-2.676	-0.946
	-0.578	-3.734
	-1.791	-3.538
	-1.048	-3.111
	-4.36	-3.855
	-2.738	-3.15
	-0.638
	-3.367	-0.585
	-3.424
	-4.205	-1.405
	-3.467	-0.945
	-3.424	-1.867
	-0.105	-0.904
	-0.191
		-0.626
		-0.578
	-2.317
		-1.548
	-0.69	-2.477
	-0.251	-2.38
		-3.241
	-3.209	-0.699
	-3.054	-0.988
	-0.909	-2.735
	-2.117
	-3.647
	-3.343	-1.481
	-1.254	-1.088
		-0.552
	-2.228
	-1.646	-1.907
	-2.231	-0.558
	-1.128	-0.551
	-1.564
	-0.534	-0.171
		-0.468
	-2.085
	-0.623	-3.461
	-0.811	-4.225
	-1.681	-1.909
		-2.992
	-3.097
	-0.953	-0.663
		-1.486
	-0.613	-2.635
	-1.858	-0.851
	-1.837
		-0.952
	-0.243	-1.131
	-5.166	-3.405
		-3.411
		-0.324
	-2.169
	-0.232	-1.955
	-0.422	-0.535
	-0.939	-2.109
	-1.643
	-0.667	-2.54
		-1.21
	-4.115
	-3.852	-0.264
	-4.048	-2.509
	-0.17	-0.801
	-0.893	-1.008
	-1.361
	-2.215
	-2.019	-1.187
	-3.643	-1.145
		-1.897
	-1.303
	-1.059	-1.192
		-2.294
	-2.75
	-0.623
	-1.202	-1.051
		-4.418
		-1.915
		-2.624
		-4.187
		-1.568
	-2.345
	-4.374	-0.967
	-1.742
	-0.708	-1.702
		-0.369
	-3.68
	-4.461	-0.731
	-0.292	-2.229
	-2.719
	-2.379	-1.577
		-0.984
		-0.107
	-4.145	-1.1
	-3.948	-0.381
	-3.784	-2.799
	-1.91	-0.207
		-2.679
	-2.991
	-2.327
	-3.441
	-3.423
	-1.046
	-0.694
	-2.93
	-3.792
	-0.481
	-0.223
	-0.705
	-1.894
	-4.671
	-2.476
	-1.569	-1.475
	-2.11	-2.043
	-0.491	-3.638
		-1.442
		-2.122
	-2.914
		-4.087
		-3.596
		-3.172
	-3.229	-1.689
		-4.661
	-0.268	-1.283
	-2.565
	-2.309
	-1.778
	-0.751
	-1.354	-3.161
	-1.454	-0.354
	-1.742
	-2.005
	-1.502
	-0.535
	-1.188
	-0.431	-2.415
		-1.048
		-0.91
		-2.732
		-1.096
		-3.858
		-0.527
		-1.506
		-2.23
		-4.879
		-1.707
		-1.188
		-0.323
		-4.241
		-2.572
		-0.921
		-2.993
		-0.167
		-1.396
		-2.351
		-2.667
		-1.971
		-1.362
		-0.428
		-1.251
		-1.204
		-0.208
		-1.611
		-1.804
		-3.518
		-0.324
		-0.876
		-2.04
		-2.604
		-0.276
		-1.845
		-1.076
		-1.52
		-1.375
		-0.503
		-2.862
		-2.979
		-1.516
		-0.975
		-2.83
		-3.35
		-4.12
		-3.936
		-2.794
		-0.872
		-0.736
		-1.338
		-2.628
		-1.283
		-0.942
		-2.951
		-1.658
		-0.771
		-2.223
		-1.401
		-1.008
		-3.884
		-1.327
		-2.326
		-1.866
		-2.679
		-1.913
		-1.674
		-1.814
		-1.159
		-1.069
		-1.661
		-1.308
		-0.956
		-4.293
		-0.848
		-3.712
		-1.039
		-1.117
		-1.138
		-1.916
		-0.78
		-5.333
		-1.6
		-1.91
		-0.602
		-0.493
		-0.62
		-0.676
		-0.873
		-1.483
		-1.566
		-0.114
		-2.339
		-1.604
		-0.949
		-1.741
		-1.872
		-2.164
		-1.746
		-0.919
		-1.497
		-2.239
		-1.852
		-1.255
		-2.5
		-3.366
		-2.191
		-0.109
		-4.663
		-2.049
		-1.196
		-1.676
		-2.107
		-1.169
		-2.561
		-1.018
		-2.759
		-2.041
		-2.925
		-1.478
		-1.509
		-2.006
		-2.823
		-0.127
		-2.323
		-1.248
		-1.681
		-0.787
		-2.804
		-3.236
		-3.184
		-2.561
		-0.825
		-2.466
		-0.168
		-4.632
		-0.963
		-2.389
		-0.794
		-0.772
		-1.75
		-1.125
		-0.942
		-1.796
		-2.622
		-2.75
		-2.185
		-0.112
		-0.505
		-2.058
		-0.977
		-0.943
		-0.364
		-1.068
		-1.935
		-2.362
		-1.708
		-1.96
		-1.769
		-2.221
		-1.276
		-2.698
		-2.158
		-2.317
		-1.575
		-0.303
		-1.704
		-2.179
		-1.351
		-4.385
		-2.114
		-0.471
		-3.82
		-1.478
		-1.262
		-1.928
		-3.416
		-0.476
		-1.899
		-0.644
		-1.934
		-0.429
		-1.9
		-3.345
		-1.234
		-0.502
		-2.036
		-2.609
		-0.944
		-5.42
		-1.109
		-1.288
		-2.859
	-3.653	-2.942
	-1.584
	-3.855	-2.706
	-0.961	-1.343
	-2.978	-0.476
	-2.873	-0.684
	-1.758
		-2.261
		-0.291
	-0.741	-2.126
	-2.354	-0.983
	-0.654
		-1.684
	-0.958	-1.242
	-2.452
	-1.165
	-3.456
	-1.584
		-3.634
		-1.238
	-4.459
	-2.277	-2.027
		-1.272
		-1.671
		-1.137
		-3.137
		-0.603
	-1.071
	-1.193
	-2.966
	-2.614
	-3.735	-0.599
		-0.548
		-2.746
	-2.829	-0.864
	-2.339	-1.714
	-1.056	-1.417
	-1.485	-0.898
	-3.617	-2.195
	-2.94
	-2.955	-1.946
	-2.52	-3.573
	-0.517	-2.116
		-3.22
		-0.191
	-1.647
	-5.126	-1.474
	-0.823	-1.291
		-2.263
		-1.66
	-1.482
		-1.039
		-0.518
		-2.211
	-1.915
	-0.608	-2.903
	-3.023	-1.85
	-0.98
	-4.356
	-2.802
	-4.24
	-0.198	-0.384
	-0.226
	-4.225	-2.652
	-1.233
	-1.611	-2.98
		-2.116
	-0.13	-2.204
	-3.615	-1.227
	-1.423	-0.831
	-0.216	-2.586
	-1.54	-2.18
		-0.837
	-2.206	-2.119
		-0.64
		-2.121
	-3.618	-2.417
	-0.976	-2.17
	-2.364	-2.354
		-1.908
		-2.163
		-1.673
		-1.041
		-1.668
		-1.775
		-2.58
		-1.245
	-0.161
		-0.938
	-1.932	-0.293
	-1.865	-0.235
	-0.765	-0.236
	-0.236
	-1.568	-1.742
		-1.111
	-1.165
	-0.949
	-1.692
		-2.401
	-3.656
	-2.524
		-1.486
	-1.215
	-2.115
	-0.738
	-0.931	-2.715
	-2.151	-0.715
	-0.959	-1.538
		-1.666
	-1.108
	-1.564	-0.437
	-1.983	-0.766
	-1.847	-1.393
		-1.402
	-2.886
		-0.223
	-2.836
	-3.273
	-1.319
	-1.838	-2.101
	-2.52
		-2.641
	-1.835	-5.427
		-0.167
		-6.258
		-0.856
		-1.014
	-3.855	-1.269
	-3.834
	-3.698
	-1.094
	-2.154
	-0.993
		-2.571
		-3.32
	-1.725	-0.486
		-0.727
	-0.743
	-1.11
	-3.774
		-0.264
	-3.274	-1.33
	-1.293	-2.059
		-0.252
	-2.967	-0.315
		-1.834
		-1.613
	-1.895	-1.544
	-1.993	-2.783
	-2.97	-1.263
	-1.267
	-2.886	-1.159
	-1.017
		-1.423
	-0.65
	-0.157
	-3.057
	-2.095	-1.434
	-3.506
	-0.234	-0.311
	-0.33
	-0.382	-0.212
		-0.324
		-1.968
	-3.681	-1.921
	-2.934
		-3.928
		-2.973
	-1.808	-2.399
	-1.142
	-1.336	-0.206
	-4.321
		-0.892
		-1.567
	-3.774
	-1.514
	-2.84
	-1.686
		-0.472
		-0.617
	-2.445	-3.041
	-0.998	-2.298
		-0.479
	-4.226	-1.699
		-3.296
	-2.93	-4.913
	-1.212
		-5.153
	-0.63	-2.055
		-1.093
	-2.56
	-2.066
	-2.576
	-3.959
	-2.668
		-4.395
		-3.392
	-1.603
		-0.57
	-0.238	-2.501
		-2.236
	-5.558	-0.63
	-1.543	-2.78
	-2.668	-2.754
		-0.821
	-1.973
	-3.798
		-0.945
		-1.027
	-5.089
	-2.367
		-2.34
	-1.602	-2.416
	-1.049
		-1.571
		-0.287
	-0.287
		-0.268
		-2.938
		-5.453
		-5.643
		-2.665
		-1.672
	-1.755	-1.529
	-1.278
	-4.991
	-1.178
	-0.446	-1.603
	-0.993
	-0.51
	-0.558	-1.228
	-0.935	-2.057
		-2.661
	-0.144
		-1.567
		-3.424
		-2.004
		-3.637
	-4.261
	-3.917
	-0.569
	-4.858
		-5.854
	-2.354	-1.318
		-2.902
	-4.036	-0.727
	-2.209
		-2.968
		-5.439
	-5.246
		-0.827
		-2.874
	-6.147	-3.69
	-3.669
	-2.817	-1.742
	-0.517
	-0.795
	-1.292	-2.21
	-1.645	-0.437
	-1.117	-1.251
		-2.627
	-1.009
		-3.595
		-0.167
	-1.431	-0.345
	-1.604	-0.927
	-0.636	-1.339
	-1.469
	-2.436
	-0.446
		-2.388
		-3.184
	-0.556	-1.57
	-2.006
	-1.416	-1.934
	-0.446	-2.69
	-2.953
	-1.712
	-0.594	-1.654
		-3.581
	-2.558	-3.248
		-1.716
		-2.498
		-1.024
		-0.64
	-3.058	-2.669
	-0.515
	-1.398
	-1.43	-2.669
	-0.198	-5.784
	-0.93	-0.849
	-2.209	-1.521
	-2.403	-1.454
	-1.45
	-1.798
	-2.518
	-3.081
	-1.887	-0.963
	-2.584	-1.654
	-1.578	-1.803
	-0.878	-2.042
	-2.288
	-2.284	-3.017
	-1.629
	-2.637	-2.852
		-3.214
	-0.457	-3.15
		-2.39
		-0.422
	-0.114
	-2.86	-0.563
	-0.698
	-2.13	-3.375
	-1.575
	-1.631	-1.731
		-2.771
	-1.106
	-1.276	-2.478
	-4.224	-1.605
	-1.318	-3.411
		-3.745
	-1.558
	-2.71	-0.437
	-1.777
	-1.61	-1.07
	-3.654	-1.293
	-1.381	-1.59
		-1.097
	-4.589	-3.223
	-5.204	-2.866
	-0.198
		-1.763
		-1.439
		-2.785
	-0.79
	-1.708	-1.33
	-2.352
		-1.644
	-2.406
	-1.542
		-5.108
		-2.711
	-2.411
	-1.053
	-2.549
	-2.64
	-2.488	-0.757
	-0.504	-0.472
		-4.331
		-5.208
		-1.604
		-1.787
	-2.123
	-2.068	-2.897
		-0.431
		-2.091
	-1.59	-2.118
	-2.831	-2.302
	-4.062
		-2.533
		-0.514
	-3.178	-1.401
	-0.113
		-1.57
		-2.505
	-1.576
	-1.479
	-3.679
		-0.615
		-0.22
	-0.574	-0.688
	-0.464
	-0.129	-1.194
	-1.234
	-0.492	-2.406
	-0.502
	-2.677
	-0.453
		-0.829
		-0.623
		-0.539
	-0.796	-0.838
		-1.061
		-2.542
	-0.152	-0.265
	-4.586	-0.968
	-1.782
		-0.503
	-5.397	-0.383
	-5.71	-0.259
	-3.939	-1.734
	-6.014
	-4.738	-1.197
		-1.176
	-2.135	-2.79
	-5.011	-0.65
		-1.138
		-0.525
	-4.811
		-0.608
	-1.893	-2.049
		-1.481
		-2.085
	-0.977
	-0.702	-0.67
	-1.108	-1.2
	-2.343	-0.121
	-0.538
	-0.687
	-2.704	-1.844
	-2.809	-0.686
	-4.144	-1.962
		-0.611
	-0.94
		-1.783
	-2.13
	-2.232
		-1.298
	-3.642	-1.569
		-1.093
	-2.276	-0.955
	-0.115	-3.626
		-0.945
		-2.218
		-2.914
		-0.691
		-2.625
	-1.798
	-0.824
	-1.338
	-1.64
	-0.733
	-1.643
	-1.264
	-2.342
	-1.495
	-0.786
		-3.058
		-2.18
	-1.888	-3.44
	-1.546	-2.729
		-3.711
	-2.817	-3.495
		-1.657
	-1.567	-2.745
		-2.574
		-5.065
		-4.515
	-2.125
	-3.479
	-2.98
	-0.867
	-1.643
	-2.599	-1.551
	-1.148	-1.584
	-0.401	-1.856
	-3.635
	-2.886
	-1.577	-1.516
	-1.643	-6.752
	-1.719	-2.057
		-1.478
		-0.753
		-2.307
		-5.559
	-2.499	-3.871
	-2.134
	-3.075	-2.32
	-3.028	-0.502
		-0.899
		-2.814
	-0.208	-2.137
	-2.287
	-0.942	-1.898
	-1.187
	-0.923
	-0.232	-3.084
	-1.876	-2.534
	-1.313	-2.482
		-2.222
	-1.852
		-2.699
	-1.876	-1.721
		-0.401
	-1.489
	-4.02
		-1.115
	-1.036
	-1.145
	-1.854
		-1.287
		-2.368
	-0.689	-0.728
	-1.622	-2.887
	-2.122	-1.46
		-1.975
		-1.179
	-3.808
		-0.991
	-0.841
	-0.493
	-0.937
	-3.694
	-2.958	-2.402
	-0.309	-0.137
	-1.626	-1.798
	-3.394	-2.023
	-3.45	-2.229
		-2.566
		-2.183
	-4.011
	-2.986
	-1.754	-2.114
		-0.237
	-2.963
		-4.597
	-4.011
	-2.267	-2.462
	-3.566	-1.02
	-2.05	-2.399
		-1.857
		-0.328
		-3.854
	-3.225
		-0.529
	-1.668
	-3.21	-0.669
	-1.826
		-2.087
	-5.408
	-6.135
	-4.334
	-5.906
	-4.109
	-0.276
	-0.67
	-3.735	-1.448
		-1.293
	-3.233	-1.027
		-1.237
	-1.653	-2.414
	-2.233	-3.233
	-3.775	-0.851
	-2.551	-2.321
	-1.732
	-1.393
	-0.412
	-2.014
	-1.897
	-0.983	-1.614
	-1	-1.194
	-0.268	-1.514
	-1.648	-0.402
	-2.136	-1.822
	-0.892
	-1.69
	-1.07
	-0.26
	-1.463	-1.752
	-2.031	-3.284
	-2.787
		-0.427
	-3.078	-2.518
		-0.962
	-0.963
	-1.523
	-1.676
		-2.711
	-1.043	-2.108
	-2.689	-1.775
	-2.081
		-1.489
		-1.893
		-0.99
		-1.482
	-2.907	-1.723
	-5.97
	-2.021	-1.947
	-0.711	-0.185
	-0.644
	-0.501
	-2.301
	-0.767	-1.582
	-0.86
		-1.339
	-1.686
	-1.367
	-2.048
	-0.501	-1.832
	-2.708	-2.678
	-2.496
		-3.019
		-0.152
		-1.645
	-1.778	-1.246
		-0.638
	-2.459	-1.841
	-2.348
	-3.747	-4.08
	-0.335
	-1.777
		-1.952
	-4.925	-0.88
	-4.253
		-2.325
	-2.063
	-0.84
	-1.171	-1.819
	-2.677
	-1.46
	-1.004	-1.93
	-0.833	-2.944
	-2.77	-2.218
		-2.848
	-1.029	-1.959
		-2.141
	-0.389	-3.469
		-2.026
		-3.455
		-3.542
		-2.956
	-1.257	-3.254
	-1.799
	-1.645	-1.718
	-2.43	-1.115
	-2.52	-1.5
		-0.65
	-2.674	-3.398
		-3.251
	-0.588	-1.834
		-0.994
		-5.215
		-0.248
	-2.853
	-1.337
		-1.858
	-3.371	-0.837
	-0.198	-2.295
	-1.7	-1.238
	-2.739	-2.117
	-0.624	-0.618
	-2.102
	-2.052
	-3.8
	-2.719
	-3.21
		-0.699
	-3.638
		-0.957
	-2.297	-2.841
	-2.421
	-0.991	-0.586
		-0.484
		-1.042
	-2.277
		-1.892
		-2.333
	-0.669	-0.973
		-3.737
		-0.424
	-1.902	-1.939
		-2.118
		-0.349
		-3.739
	-1.88	-3.655
	-0.868
	-0.834	-0.242
	-2.047	-0.975
	-0.592
	-0.847
	-1.941	-2.643
	-1.147
	-1.438	-1.881
		-2.136
		-0.894
		-3.609
	-0.295
	-2.476	-1.89
	-1.095	-3.016
	-2.183	-1.128
	-1.577
	-1.566
	-2.006	-1.656
	-1.616
		-1.111
	-1.202
	-1.248
		-1.803
		-2.204
		-1.221
		-1.251
		-1.119
		-2.498
		-1.81
		-0.963
		-2.337
		-0.511
		-1.271
		-1.283
		-1.723
		-1.102
		-1.226
		-0.451
		-0.878
		-0.321
		-2.733
		-1.222
		-1.295
		-1.729
		-2.247
		-3.147
		-1.97
		-3.263
		-3.041
		-4.157
		-0.891
		-2.976
		-1.258
		-1.375
		-1.346
		-1.71
		-0.998
		-3.589
		-0.237
		-0.573
		-3.12
		-3.505
		-1.231
		-4.619
		-2.507
		-1.337
		-2.343
		-1.468
	-2.03	-1.346
	-2.576
	-1.409
	-1.079
	-0.282
	-0.591
	-1.937
	-1.02
	-0.745	-3.709
	-1.941	-3.14
		-2.694
		-1.533
		-0.191
	-2.943	-2.902
	-2.486
		-1.731
	-1.474	-2.239
	-2.632	-2.552
	-2.394	-3.872
	-0.602	-3.21
		-3.14
		-2.26
	-1.177	-0.115
	-1.141	-4.263
	-0.536	-0.38
	-1.673	-2.957
	-1.474	-2.649
	-0.735	-4.013
	-2.831
		-1.216
	-5.107
		-4.28
	-4.59
		-2.27
	-6.252	-3.253
	-3.248	-3.167
	-2.824
	-2.081	-0.638
	-0.759
	-1.146
	-4.331	-0.955
		-0.704
		-0.376
		-0.141
		-0.892
	-1.802
	-2.685	-3
		-3.477
	-3.781	-0.178
	-2.13	-3.643
		-1.264
		-1.444
	-1.144
	-1.109	-0.574
		-1.457
	-2.199
		-1.339
		-0.462
	-2.344
	-1.155
	-1.229	-3.385
		-1.94
	-1.476	-2.153
	-1.448
	-0.602	-2.418
	-4.319
		-3.791
		-2.28
	-2.271	-1.663
	-2.591	-2.393
		-4.107
	-2.5
	-2.144
	-2.68
	-1.16
	-3.643
		-1.116
	-0.596	-2.264
	-1.15	-1.339
		-0.885
		-2.038
		-2.425
		-3.943
	-1.22
	-3.529
		-0.436
	-1.15	-2.527
	-0.988
	-1.893	-1.621
	-1.489
	-1.039	-1.148
	-2.722	-2.765
	-1.608	-1.468
		-1.532
	-3.411	-0.648
	-0.922	-1.996
	-1.553
	-2.233
	-1.171	-1.225
	-2.365	-2.215
	-0.569	-2.209
		-1.186
		-2.232
	-3.106
		-1.492
	-0.518
	-3.81
	-1.059
	-0.379
		-2.654
		-0.42
		-2.63
		-2.461
	-1.242	-1.152
	-2.359
	-0.807	-1.499
		-2.574
	-1.106
	-0.405
	-1.989
	-1.196
		-0.547
	-2.252	-0.412
	-3.767
	-2.251	-2.23
		-3.901
		-2.358
	-0.305
		-0.338
	-0.678	-2.068
		-2.095
	-1.055	-2.459
	-1.634
		-2.355
	-0.421
	-2.228
	-1.211
	-1.534	-0.365
	-1.092
		-0.35
		-2.551
	-1.973	-0.545
		-2.249
	-3.037	-1.39
		-2.19
	-0.263
	-2.301
		-2.081
	-0.286	-1.513
		-1.464
		-1.756
		-1.029
		-0.834
		-1.872
		-0.365
	-1.996
	-1.439	-1.217
		-1.363
	-3.234
	-0.846	-1.588
	-2.853	-2.035
	-0.143	-0.287
	-1.053	-0.422
	-0.838
	-0.11
		-0.736
	-2.423
	-3.154
	-0.508
	-2.43
		-0.864
	-1.613	-1.658
		-1.319
	-0.86	-1.421
		-1.664
		-3.319
	-3.193
	-1.04
		-3.375
	-3.322	-2.635
	-3.198
	-1.675	-1.049
		-1.639
	-5.394
	-3.211
	-2.285
	-3.998	-0.179
		-0.387
		-2.679
		-1.339
		-1.078
		-0.335
	-4.508	-2.67
	-2.193
	-1.813
		-2.897
		-2.053
		-2.111
	-0.314
		-2.698
		-2.143
		-1.247
	-2.993
	-1.436
	-1.851
	-2.072
		-1.744
		-1.599
	-2.933
		-2.498
		-2.11
		-0.446
		-0.963
	-0.783	-3.393
		-2.926
	-0.121
	-0.801
	-1.125
	-6.205	-1.982
		-1.541
	-4.316	-1.33
		-1.826
		-0.346
		-2.443
		-0.895
		-0.417
		-2.757
	-0.697
	-1.204
	-0.535
		-0.594
	-1.263	-0.299
	-2.212	-5.118
	-4.059
	-1.491	-0.356
	-4.62	-0.228
	-2.69
	-3.211	-4.092
	-3.425	-0.446
		-0.706
	-0.618
		-1.009
	-0.944
	-0.166
	-0.82	-2.473
	-2.143	-1.699
	-0.845	-2.162
		-0.953
		-2.135
		-1.122
		-0.643
		-1.585
	-0.93
		-1.046
		-2.15
	-0.843	-0.882
	-0.606
	-0.719
	-0.668
		-0.781
	-1.95
	-1.553	-1.612
	-1.785	-0.135
	-1.182
	-2.098
	-0.495
	-1.636
	-1.636	-2.75
		-2.863
		-5.652
	-2.003	-1.737
	-3.338
	-1.814	-1.311
		-0.647
	-2.057
	-1.089
	-2.999
	-0.971
	-0.385	-1.444
		-2.24
		-0.239
		-1.479
	-2.123	-1.32
	-1.591	-1.399
	-1.206	-0.478
	-1.075
	-2.332
	-2.518
	-3.37
	-0.993
	-0.474
	-2.785
	-0.223
		-3.375
	-1.751	-0.979
	-0.534	-1.517
		-1.91
		-1.885
		-0.67
		-1.851
		-0.916
		-0.33
		-2.055
	-3.336
	-2.224	-1.586
	-2.052	-0.756
	-1.831
		-2.349
		-0.236
	-2.214	-2.874
		-0.191
	-1.216	-0.446
		-1.806
		-2.282
		-1.957
		-1.212
		-0.774
		-0.665
		-0.727
		-2.053
		-1.451
	-1.023	-2.608
	-3.416	-2.678
	-4.094	-0.778
	-2.614
	-4.257	-0.298
	-1.554	-1.92
	-2.722
	-3.148	-3.519
	-0.223
	-0.635
	-2.439	-1.369
	-3.501	-3.076
	-3.465
	-0.995	-1.339
	-1.807	-0.195
	-1.639
		-2.024
	-0.298	-3.072
	-2.876	-2.224
	-4.802
	-4.366
		-1.64
		-1.872
	-2.134	-3.732
	-1.364	-3.916
	-5.534
		-1.497
		-2.16
	-0.88	-2.366
	-0.153
		-2.766
	-0.502
		-0.478
	-3.214	-2.435
	-1.128	-0.591
	-2.498	-3.329
		-4.342
		-3.76
	-0.818	-3.373
	-0.972	-2.051
	-2.556	-2.161
		-4.682
		-2.675
	-1.754	-1.829
		-3.705
	-1.515
		-4.013
	-1.249
	-0.128
		-1.027
		-0.986
	-0.708	-3.905
	-2.262
	-1.542
	-1.287
	-1.345
	-1.708	-1.903
		-2.176
		-0.303
	-0.923	-1.4
	-2.559
		-1.67
	-2.095	-0.62
	-0.15
	-0.183	-2.153
	-2.158
	-0.964	-1.034
	-2.756	-0.458
	-2.439	-1.436
	-2.337
	-0.813
	-0.568
	-0.164	-3.891
		-0.937
	-1.484	-1.762
		-0.727
		-0.407
		-1.907
	-2.252	-1.426
	-1.711	-0.927
	-1.259
	-0.713
	-3.594
	-1.961
	-0.258	-2.666
	-1.255
		-2.216
	-0.981	-2.433
		-2.251
		-0.785
	-3.97
		-0.62
	-3.834
	-0.92
	-0.467
	-1.635
	-4.299
	-0.405
	-2.397
	-3.128	-2.603
		-3.15
	-2.742
		-1.541
	-1.808
	-2.804	-2.26
		-1.662
		-1.701
	-1.975
	-4.246
	-1.058
	-3.585	-1.655
	-3.513
	-3.152
	-1.144
	-3.511
	-0.367
	-0.446
		-1.699
	-5.653	-0.198
		-0.799
		-1.278
	-4.588	-0.835
	-2.676
		-2.185
		-1.828
	-5.112	-0.742
	-1.846	-2.673
		-2.467
		-0.291
	-3.082
		-1.746
	-1.526	-3.492
		-2.825
	-1.115	-1.994
	-0.715	-3.415
		-0.862
		-2.455
		-4.716
	-4.588
	-4.442
		-0.186
	-1.119	-0.179
	-0.516	-1.673
		-0.912
	-2.032	-1.673
	-3.429
	-5.282	-4.31
	-3.859	-3.195
	-1.84
		-1.004
		-1.175
		-1.937
		-1.827
		-0.669
		-2.177
		-3.472
		-3.115
		-4.198
		-4.017
		-2.484
		-1.473
		-3.515
		-0.103
		-1.163
		-0.669
		-3.06
		-4.849
		-2.932
		-1.085
		-0.103
		-4.448
		-0.824
		-2.326
		-0.167
		-0.856
		-3.13
		-3.07
		-1.653
		-1.994
		-2.223
		-2.602
		-6.307
		-1.281
		-2.631
		-3.771
		-1.434
		-0.382
		-3.345
		-3.59
		-0.916
		-0.371
		-3.393
		-2.049
		-1.338
		-0.122
		-2.192
		-1.021
		-2.861
		-2.568
		-0.331
		-1.451
		-2.573
		-1.011
		-1.926
		-3.843
		-3.114
		-0.109
		-3.86
		-2.16
		-1.241
		-0.191
		-0.893
		-0.701
		-0.476
		-2.755
		-0.67
		-2.48
		-0.714
		-3.683
		-1.878
		-0.967
		-2.531
		-2.608
		-1.41
		-2.317
		-0.892
		-1.116
		-1.221
		-0.856
		-1.864
		-1.65
		-2.677
		-2.029
		-1.549
		-5.354
		-1.188
		-4.406
		-1.752
		-2.966
		-2.897
		-4.36
		-1.968
		-2.294
		-2.451
		-2.875
		-2.998
		-3.553
		-0.802
		-3.12
		-3.961
		-3.646
		-1.645
		-1.106
		-0.804
		-1.205
		-1.63
		-1.987
		-3.872
		-2.967
		-1.551
		-2.335
		-2.452
		-1.927
		-0.979
		-0.788
		-0.893
		-0.257
		-1.296
		-1.961
		-1.338
		-0.94
		-2.713
		-1.712
		-0.608
		-4.516
		-0.446
		-3.17
		-1.338
		-3.196
		-0.601
		-1.037
		-1.758
		-2.527
		-3.386
		-4.323
		-3.407
		-2.195
		-1.751
		-1.553
		-1.744
		-0.828
		-1.42
		-0.149
		-0.545
		-2.256
		-2.451
		-0.817
		-1.682
		-1.504
		-2.595
		-1.528
		-1.599
		-4.37
		-1.768
		-1.655
		-1.173
		-1.083
		-2.512
		-3.147
		-2.807
		-0.613
		-2.822
		-2.481
		-4.61
		-2.844
		-2.877
		-2.992
		-2.204
		-1.902
		-1.087
		-0.892
		-4.015
		-1.525
		-1.625
		-0.429
		-0.646
		-0.352
		-0.556
		-0.459
		-1.673
		-1.294
		-0.613
		-3.028
		-2.151
		-0.397
		-0.925
		-0.826
		-2.43
		-2.148
		-0.243
		-1.586
		-2.554
		-2.164
		-3.357
		-3.014
		-0.492
		-0.223
		-2.254
		-2.765
		-0.787
		-0.282
		-1.32
		-0.839
		-0.446
		-0.187
		-1.634
		-1.023
		-0.65
		-3.044
		-1.242
		-1.843
		-4.269
		-2.916
		-1.338
		-3.662
		-2.798
		-2.07
		-5.575
		-1.338
		-3.467
		-4.655
		-2.23
		-4.205
		-2.817
		-2.31
		-0.903
		-1.819
		-3.154
		-1.75
		-1.225
		-0.103
		-3.718
		-2.273
		-2.943
[truncated: 85 more rows]

## Sheet: Figure 5e-VAMP2 level vesic
	Wild-type	HTT-SD
	0.258492	1.92309
	1.40794	1.60567
	0.663922	1.76842
	-2.391	-1.624
		-1.607
	-1.185	-0.267
		-0.793
	-0.522
		-3.581
	-1.21	-1.547
	-1.071
		-1.788
	-0.985	-1.017
		-0.565
	-0.893
	-0.228	-0.195
	-0.393
	-0.319	-0.914
	-3.247
	-0.794
	-0.427	-0.167
	-5.05	-4.547
	-2.187
	-0.139
	-0.863
	-3.342
	-1.583
	-2.679
	-4.342	-1.702
		-1.79
		-1.067
		-0.937
	-3.304
	-3.301	-1.769
	-1.662
		-1.183
		-2.364
	-2.314
		-1.774
	-1.715	-1.731
	-1.692
	-1.652
	-4.114	-0.805
		-2.602
	-3.367
		-2.219
		-0.773
	-0.425	-0.786
		-0.983
		-1.351
		-2.537
		-2.804
		-2.592
	-0.206	-0.618
		-3.088
		-2.438
	-0.736	-3.483
	-0.566
	-0.382
		-5.252
	-3.765
	-3.135
	-1.946
	-2.519
	-0.495
	-0.472	-0.477
		-0.581
		-0.278
	-0.141	-0.585
	-2.362
	-1.84	-2.45
	-1.013
	-1.918
	-0.254
	-0.861	-1.48
	-0.76	-0.607
	-0.8
		-2.169
		-0.277
	-0.549
	-1.234
	-0.536
	-0.549
	-1.859	-1.913
	-3.157	-1.267
		-1.816
	-0.251	-2.87
	-2.411	-1.089
	-0.119	-1.421
		-3.355
		-4.593
	-2.362	-2.191
	-1.953
	-1.639
		-0.565
	-1.394	-2.486
	-4.52	-3.08
		-0.321
	-0.548
	-3.044
		-6.43
	-1.444	-3.062
	-1.005	-3.656
	-2.222	-1.227
	-1.092
	-1.756
	-1.192
	-1.444	-0.595
		-0.899
	-2.649
		-1.837
	-0.441	-2.403
	-2.322	-1.03
		-1.96
	-2.064
		-3.965
	-1.681	-0.626
	-0.511	-0.544
	-1.116
	-1.858
		-0.9
		-0.141
	-1.339	-2.635
	-2.41	-3.634
	-0.736
		-0.351
		-0.714
	-1.841	-0.705
	-1.626
	-4.531	-0.878
		-0.151
	-2.163
	-4.566
	-4.291	-0.329
		-2.24
		-1.726
	-1.693	-1.617
	-0.919	-1.715
	-1.631
	-1.726	-0.17
	-2.418	-0.897
		-1.541
		-1.412
	-2.128	-3.228
		-1.271
		-1.83
	-1.658	-3.395
		-0.466
	-1.207	-0.855
	-1.119	-1.69
	-2.264
	-1.039
	-0.404	-0.496
		-0.829
		-1.017
	-1.269	-1.62
		-1.198
	-0.273	-1.405
	-1.11
	-1.481	-0.521
		-1.422
	-0.873
		-0.719
	-0.141	-1.135
		-2.156
	-0.923
		-2.438
	-1.149	-2.965
		-1.229
		-0.149
	-2.818
	-1.59
		-1.262
	-0.904	-2.591
	-5.271
	-1.858	-3.157
	-0.323
		-2.087
	-1.42	-0.977
	-1.479	-1.688
	-1.721
		-2.674
	-1.618	-1.693
		-0.555
	-0.77	-1.037
	-1.085	-1.381
	-0.551	-0.933
	-1.74	-1.925
		-1.379
		-1.602
	-2.706	-1.072
	-2.941	-1.843
	-2.362
	-1.846	-1.793
	-0.683	-0.858
	-0.835
		-0.24
	-3.131	-1.006
		-0.958
		-0.576
		-1.218
	-3.147
		-4.227
	-1.138	-0.824
	-1	-1.011
	-1.028	-2.117
	-3.2	-0.251
	-1.77	-0.181
	-3.011	-1.05
	-0.267
	-1.253	-0.638
	-1.383
	-1.672	-1.671
	-2.87	-4.353
	-3.167	-0.804
	-0.94
	-0.739	-0.134
		-0.659
		-3.432
	-1.565	-1.785
		-2.286
	-1.922	-0.178
	-0.456	-0.892
	-0.435
		-1.549
		-1.435
	-3.136	-2.758
	-2.109	-0.228
	-2.523
	-2.959	-3.833
	-2.676	-0.946
	-0.578	-3.734
	-1.791	-3.538
	-1.048	-3.111
	-4.36	-3.855
	-2.738	-3.15
	-0.638
	-3.367	-0.585
	-3.424
	-4.205	-1.405
	-3.467	-0.945
	-3.424	-1.867
	-0.105	-0.904
	-0.191
		-0.626
		-0.578
	-2.317
		-1.548
	-0.69	-2.477
	-0.251	-2.38
		-3.241
	-3.209	-0.699
	-3.054	-0.988
	-0.909	-2.735
	-2.117
	-3.647
	-3.343	-1.481
	-1.254	-1.088
		-0.552
	-2.228
	-1.646	-1.907
	-2.231	-0.558
	-1.128	-0.551
	-1.564
	-0.534	-0.171
		-0.468
	-2.085
	-0.623	-3.461
	-0.811	-4.225
	-1.681	-1.909
		-2.992
	-3.097
	-0.953	-0.663
		-1.486
	-0.613	-2.635
	-1.858	-0.851
	-1.837
		-0.952
	-0.243	-1.131
	-5.166	-3.405
		-3.411
		-0.324
	-2.169
	-0.232	-1.955
	-0.422	-0.535
	-0.939	-2.109
	-1.643
	-0.667	-2.54
		-1.21
	-4.115
	-3.852	-0.264
	-4.048	-2.509
	-0.17	-0.801
	-0.893	-1.008
	-1.361
	-2.215
	-2.019	-1.187
	-3.643	-1.145
		-1.897
	-1.303
	-1.059	-1.192
		-2.294
	-2.75
	-0.623
	-1.202	-1.051
		-4.418
		-1.915
		-2.624
		-4.187
		-1.568
	-2.345
	-4.374	-0.967
	-1.742
	-0.708	-1.702
		-0.369
	-3.68
	-4.461	-0.731
	-0.292	-2.229
	-2.719
	-2.379	-1.577
		-0.984
		-0.107
	-4.145	-1.1
	-3.948	-0.381
	-3.784	-2.799
	-1.91	-0.207
		-2.679
	-2.991
	-2.327
	-3.441
	-3.423
	-1.046
	-0.694
	-2.93
	-3.792
	-0.481
	-0.223
	-0.705
	-1.894
	-4.671
	-2.476
	-1.569	-1.475
	-2.11	-2.043
	-0.491	-3.638
		-1.442
		-2.122
	-2.914
		-4.087
		-3.596
		-3.172
	-3.229	-1.689
		-4.661
	-0.268	-1.283
	-2.565
	-2.309
	-1.778
	-0.751
	-1.354	-3.161
	-1.454	-0.354
	-1.742
	-2.005
	-1.502
	-0.535
	-1.188
	-0.431	-2.415
		-1.048
		-0.91
		-2.732
		-1.096
		-3.858
		-0.527
		-1.506
		-2.23
		-4.879
		-1.707
		-1.188
		-0.323
		-4.241
		-2.572
		-0.921
		-2.993
		-0.167
		-1.396
		-2.351
		-2.667
		-1.971
		-1.362
		-0.428
		-1.251
		-1.204
		-0.208
		-1.611
		-1.804
		-3.518
		-0.324
		-0.876
		-2.04
		-2.604
		-0.276
		-1.845
		-1.076
		-1.52
		-1.375
		-0.503
		-2.862
		-2.979
		-1.516
		-0.975
		-2.83
		-3.35
		-4.12
		-3.936
		-2.794
		-0.872
		-0.736
		-1.338
		-2.628
		-1.283
		-0.942
		-2.951
		-1.658
		-0.771
		-2.223
		-1.401
		-1.008
		-3.884
		-1.327
		-2.326
		-1.866
		-2.679
		-1.913
		-1.674
		-1.814
		-1.159
		-1.069
		-1.661
		-1.308
		-0.956
		-4.293
		-0.848
		-3.712
		-1.039
		-1.117
		-1.138
		-1.916
		-0.78
		-5.333
		-1.6
		-1.91
		-0.602
		-0.493
		-0.62
		-0.676
		-0.873
		-1.483
		-1.566
		-0.114
		-2.339
		-1.604
		-0.949
		-1.741
		-1.872
		-2.164
		-1.746
		-0.919
		-1.497
		-2.239
		-1.852
		-1.255
		-2.5
		-3.366
		-2.191
		-0.109
		-4.663
		-2.049
		-1.196
		-1.676
		-2.107
		-1.169
		-2.561
		-1.018
		-2.759
		-2.041
		-2.925
		-1.478
		-1.509
		-2.006
		-2.823
		-0.127
		-2.323
		-1.248
		-1.681
		-0.787
		-2.804
		-3.236
		-3.184
		-2.561
		-0.825
		-2.466
		-0.168
		-4.632
		-0.963
		-2.389
		-0.794
		-0.772
		-1.75
		-1.125
		-0.942
		-1.796
		-2.622
		-2.75
		-2.185
		-0.112
		-0.505
		-2.058
		-0.977
		-0.943
		-0.364
		-1.068
		-1.935
		-2.362
		-1.708
		-1.96
		-1.769
		-2.221
		-1.276
		-2.698
		-2.158
		-2.317
		-1.575
		-0.303
		-1.704
		-2.179
		-1.351
		-4.385
		-2.114
		-0.471
		-3.82
		-1.478
		-1.262
		-1.928
		-3.416
		-0.476
		-1.899
		-0.644
		-1.934
		-0.429
		-1.9
		-3.345
		-1.234
		-0.502
		-2.036
		-2.609
		-0.944
		-5.42
		-1.109
		-1.288
		-2.859
	-3.653	-2.942
	-1.584
	-3.855	-2.706
	-0.961	-1.343
	-2.978	-0.476
	-2.873	-0.684
	-1.758
		-2.261
		-0.291
	-0.741	-2.126
	-2.354	-0.983
	-0.654
		-1.684
	-0.958	-1.242
	-2.452
	-1.165
	-3.456
	-1.584
		-3.634
		-1.238
	-4.459
	-2.277	-2.027
		-1.272
		-1.671
		-1.137
		-3.137
		-0.603
	-1.071
	-1.193
	-2.966
	-2.614
	-3.735	-0.599
		-0.548
		-2.746
	-2.829	-0.864
	-2.339	-1.714
	-1.056	-1.417
	-1.485	-0.898
	-3.617	-2.195
	-2.94
	-2.955	-1.946
	-2.52	-3.573
	-0.517	-2.116
		-3.22
		-0.191
	-1.647
	-5.126	-1.474
	-0.823	-1.291
		-2.263
		-1.66
	-1.482
		-1.039
		-0.518
		-2.211
	-1.915
	-0.608	-2.903
	-3.023	-1.85
	-0.98
	-4.356
	-2.802
	-4.24
	-0.198	-0.384
	-0.226
	-4.225	-2.652
	-1.233
	-1.611	-2.98
		-2.116
	-0.13	-2.204
	-3.615	-1.227
	-1.423	-0.831
	-0.216	-2.586
	-1.54	-2.18
		-0.837
	-2.206	-2.119
		-0.64
		-2.121
	-3.618	-2.417
	-0.976	-2.17
	-2.364	-2.354
		-1.908
		-2.163
		-1.673
		-1.041
		-1.668
		-1.775
		-2.58
		-1.245
	-0.161
		-0.938
	-1.932	-0.293
	-1.865	-0.235
	-0.765	-0.236
	-0.236
	-1.568	-1.742
		-1.111
	-1.165
	-0.949
	-1.692
		-2.401
	-3.656
	-2.524
		-1.486
	-1.215
	-2.115
	-0.738
	-0.931	-2.715
	-2.151	-0.715
	-0.959	-1.538
		-1.666
	-1.108
	-1.564	-0.437
	-1.983	-0.766
	-1.847	-1.393
		-1.402
	-2.886
		-0.223
	-2.836
	-3.273
	-1.319
	-1.838	-2.101
	-2.52
		-2.641
	-1.835	-5.427
		-0.167
		-6.258
		-0.856
		-1.014
	-3.855	-1.269
	-3.834
	-3.698
	-1.094
	-2.154
	-0.993
		-2.571
		-3.32
	-1.725	-0.486
		-0.727
	-0.743
	-1.11
	-3.774
		-0.264
	-3.274	-1.33
	-1.293	-2.059
		-0.252
	-2.967	-0.315
		-1.834
		-1.613
	-1.895	-1.544
	-1.993	-2.783
	-2.97	-1.263
	-1.267
	-2.886	-1.159
	-1.017
		-1.423
	-0.65
	-0.157
	-3.057
	-2.095	-1.434
	-3.506
	-0.234	-0.311
	-0.33
	-0.382	-0.212
		-0.324
		-1.968
	-3.681	-1.921
	-2.934
		-3.928
		-2.973
	-1.808	-2.399
	-1.142
	-1.336	-0.206
	-4.321
		-0.892
		-1.567
	-3.774
	-1.514
	-2.84
	-1.686
		-0.472
		-0.617
	-2.445	-3.041
	-0.998	-2.298
		-0.479
	-4.226	-1.699
		-3.296
	-2.93	-4.913
	-1.212
		-5.153
	-0.63	-2.055
		-1.093
	-2.56
	-2.066
	-2.576
	-3.959
	-2.668
		-4.395
		-3.392
	-1.603
		-0.57
	-0.238	-2.501
		-2.236
	-5.558	-0.63
	-1.543	-2.78
	-2.668	-2.754
		-0.821
	-1.973
	-3.798
		-0.945
		-1.027
	-5.089
	-2.367
		-2.34
	-1.602	-2.416
	-1.049
		-1.571
		-0.287
	-0.287
		-0.268
		-2.938
		-5.453
		-5.643
		-2.665
		-1.672
	-1.755	-1.529
	-1.278
	-4.991
	-1.178
	-0.446	-1.603
	-0.993
	-0.51
	-0.558	-1.228
	-0.935	-2.057
		-2.661
	-0.144
		-1.567
		-3.424
		-2.004
		-3.637
	-4.261
	-3.917
	-0.569
	-4.858
		-5.854
	-2.354	-1.318
		-2.902
	-4.036	-0.727
	-2.209
		-2.968
		-5.439
	-5.246
		-0.827
		-2.874
	-6.147	-3.69
	-3.669
	-2.817	-1.742
	-0.517
	-0.795
	-1.292	-2.21
	-1.645	-0.437
	-1.117	-1.251
		-2.627
	-1.009
		-3.595
		-0.167
	-1.431	-0.345
	-1.604	-0.927
	-0.636	-1.339
	-1.469
	-2.436
	-0.446
		-2.388
		-3.184
	-0.556	-1.57
	-2.006
	-1.416	-1.934
	-0.446	-2.69
	-2.953
	-1.712
	-0.594	-1.654
		-3.581
	-2.558	-3.248
		-1.716
		-2.498
		-1.024
		-0.64
	-3.058	-2.669
	-0.515
	-1.398
	-1.43	-2.669
	-0.198	-5.784
	-0.93	-0.849
	-2.209	-1.521
	-2.403	-1.454
	-1.45
	-1.798
	-2.518
	-3.081
	-1.887	-0.963
	-2.584	-1.654
	-1.578	-1.803
	-0.878	-2.042
	-2.288
	-2.284	-3.017
	-1.629
	-2.637	-2.852
		-3.214
	-0.457	-3.15
		-2.39
		-0.422
	-0.114
	-2.86	-0.563
	-0.698
	-2.13	-3.375
	-1.575
	-1.631	-1.731
		-2.771
	-1.106
	-1.276	-2.478
	-4.224	-1.605
	-1.318	-3.411
		-3.745
	-1.558
	-2.71	-0.437
	-1.777
	-1.61	-1.07
	-3.654	-1.293
	-1.381	-1.59
		-1.097
	-4.589	-3.223
	-5.204	-2.866
	-0.198
		-1.763
		-1.439
		-2.785
	-0.79
	-1.708	-1.33
	-2.352
		-1.644
	-2.406
	-1.542
		-5.108
		-2.711
	-2.411
	-1.053
	-2.549
	-2.64
	-2.488	-0.757
	-0.504	-0.472
		-4.331
		-5.208
		-1.604
		-1.787
	-2.123
	-2.068	-2.897
		-0.431
		-2.091
	-1.59	-2.118
	-2.831	-2.302
	-4.062
		-2.533
		-0.514
	-3.178	-1.401
	-0.113
		-1.57
		-2.505
	-1.576
	-1.479
	-3.679
		-0.615
		-0.22
	-0.574	-0.688
	-0.464
	-0.129	-1.194
	-1.234
	-0.492	-2.406
	-0.502
	-2.677
	-0.453
		-0.829
		-0.623
		-0.539
	-0.796	-0.838
		-1.061
		-2.542
	-0.152	-0.265
	-4.586	-0.968
	-1.782
		-0.503
	-5.397	-0.383
	-5.71	-0.259
	-3.939	-1.734
	-6.014
	-4.738	-1.197
		-1.176
	-2.135	-2.79
	-5.011	-0.65
		-1.138
		-0.525
	-4.811
		-0.608
	-1.893	-2.049
		-1.481
		-2.085
	-0.977
	-0.702	-0.67
	-1.108	-1.2
	-2.343	-0.121
	-0.538
	-0.687
	-2.704	-1.844
	-2.809	-0.686
	-4.144	-1.962
		-0.611
	-0.94
		-1.783
	-2.13
	-2.232
		-1.298
	-3.642	-1.569
		-1.093
	-2.276	-0.955
	-0.115	-3.626
		-0.945
		-2.218
		-2.914
		-0.691
		-2.625
	-1.798
	-0.824
	-1.338
	-1.64
	-0.733
	-1.643
	-1.264
	-2.342
	-1.495
	-0.786
		-3.058
		-2.18
	-1.888	-3.44
	-1.546	-2.729
		-3.711
	-2.817	-3.495
		-1.657
	-1.567	-2.745
		-2.574
		-5.065
		-4.515
	-2.125
	-3.479
	-2.98
	-0.867
	-1.643
	-2.599	-1.551
	-1.148	-1.584
	-0.401	-1.856
	-3.635
	-2.886
	-1.577	-1.516
	-1.643	-6.752
	-1.719	-2.057
		-1.478
		-0.753
		-2.307
		-5.559
	-2.499	-3.871
	-2.134
	-3.075	-2.32
	-3.028	-0.502
		-0.899
		-2.814
	-0.208	-2.137
	-2.287
	-0.942	-1.898
	-1.187
	-0.923
	-0.232	-3.084
	-1.876	-2.534
	-1.313	-2.482
		-2.222
	-1.852
		-2.699
	-1.876	-1.721
		-0.401
	-1.489
	-4.02
		-1.115
	-1.036
	-1.145
	-1.854
		-1.287
		-2.368
	-0.689	-0.728
	-1.622	-2.887
	-2.122	-1.46
		-1.975
		-1.179
	-3.808
		-0.991
	-0.841
	-0.493
	-0.937
	-3.694
	-2.958	-2.402
	-0.309	-0.137
	-1.626	-1.798
	-3.394	-2.023
	-3.45	-2.229
		-2.566
		-2.183
	-4.011
	-2.986
	-1.754	-2.114
		-0.237
	-2.963
		-4.597
	-4.011
	-2.267	-2.462
	-3.566	-1.02
	-2.05	-2.399
		-1.857
		-0.328
		-3.854
	-3.225
		-0.529
	-1.668
	-3.21	-0.669
	-1.826
		-2.087
	-5.408
	-6.135
	-4.334
	-5.906
	-4.109
	-0.276
	-0.67
	-3.735	-1.448
		-1.293
	-3.233	-1.027
		-1.237
	-1.653	-2.414
	-2.233	-3.233
	-3.775	-0.851
	-2.551	-2.321
	-1.732
	-1.393
	-0.412
	-2.014
	-1.897
	-0.983	-1.614
	-1	-1.194
	-0.268	-1.514
	-1.648	-0.402
	-2.136	-1.822
	-0.892
	-1.69
	-1.07
	-0.26
	-1.463	-1.752
	-2.031	-3.284
	-2.787
		-0.427
	-3.078	-2.518
		-0.962
	-0.963
	-1.523
	-1.676
		-2.711
	-1.043	-2.108
	-2.689	-1.775
	-2.081
		-1.489
		-1.893
		-0.99
		-1.482
	-2.907	-1.723
	-5.97
	-2.021	-1.947
	-0.711	-0.185
	-0.644
	-0.501
	-2.301
	-0.767	-1.582
	-0.86
		-1.339
	-1.686
	-1.367
	-2.048
	-0.501	-1.832
	-2.708	-2.678
	-2.496
		-3.019
		-0.152
		-1.645
	-1.778	-1.246
		-0.638
	-2.459	-1.841
	-2.348
	-3.747	-4.08
	-0.335
	-1.777
		-1.952
	-4.925	-0.88
	-4.253
		-2.325
	-2.063
	-0.84
	-1.171	-1.819
	-2.677
	-1.46
	-1.004	-1.93
	-0.833	-2.944
	-2.77	-2.218
		-2.848
	-1.029	-1.959
		-2.141
	-0.389	-3.469
		-2.026
		-3.455
		-3.542
		-2.956
	-1.257	-3.254
	-1.799
	-1.645	-1.718
	-2.43	-1.115
	-2.52	-1.5
		-0.65
	-2.674	-3.398
		-3.251
	-0.588	-1.834
		-0.994
		-5.215
		-0.248
	-2.853
	-1.337
		-1.858
	-3.371	-0.837
	-0.198	-2.295
	-1.7	-1.238
	-2.739	-2.117
	-0.624	-0.618
	-2.102
	-2.052
	-3.8
	-2.719
	-3.21
		-0.699
	-3.638
		-0.957
	-2.297	-2.841
	-2.421
	-0.991	-0.586
		-0.484
		-1.042
	-2.277
		-1.892
		-2.333
	-0.669	-0.973
		-3.737
		-0.424
	-1.902	-1.939
		-2.118
		-0.349
		-3.739
	-1.88	-3.655
	-0.868
	-0.834	-0.242
	-2.047	-0.975
	-0.592
	-0.847
	-1.941	-2.643
	-1.147
	-1.438	-1.881
		-2.136
		-0.894
		-3.609
	-0.295
	-2.476	-1.89
	-1.095	-3.016
	-2.183	-1.128
	-1.577
	-1.566
	-2.006	-1.656
	-1.616
		-1.111
	-1.202
	-1.248
		-1.803
		-2.204
		-1.221
		-1.251
		-1.119
		-2.498
		-1.81
		-0.963
		-2.337
		-0.511
		-1.271
		-1.283
		-1.723
		-1.102
		-1.226
		-0.451
		-0.878
		-0.321
		-2.733
		-1.222
		-1.295
		-1.729
		-2.247
		-3.147
		-1.97
		-3.263
		-3.041
		-4.157
		-0.891
		-2.976
		-1.258
		-1.375
		-1.346
		-1.71
		-0.998
		-3.589
		-0.237
		-0.573
		-3.12
		-3.505
		-1.231
		-4.619
		-2.507
		-1.337
		-2.343
		-1.468
	-2.03	-1.346
	-2.576
	-1.409
	-1.079
	-0.282
	-0.591
	-1.937
	-1.02
	-0.745	-3.709
	-1.941	-3.14
		-2.694
		-1.533
		-0.191
	-2.943	-2.902
	-2.486
		-1.731
	-1.474	-2.239
	-2.632	-2.552
	-2.394	-3.872
	-0.602	-3.21
		-3.14
		-2.26
	-1.177	-0.115
	-1.141	-4.263
	-0.536	-0.38
	-1.673	-2.957
	-1.474	-2.649
	-0.735	-4.013
	-2.831
		-1.216
	-5.107
		-4.28
	-4.59
		-2.27
	-6.252	-3.253
	-3.248	-3.167
	-2.824
	-2.081	-0.638
	-0.759
	-1.146
	-4.331	-0.955
		-0.704
		-0.376
		-0.141
		-0.892
	-1.802
	-2.685	-3
		-3.477
	-3.781	-0.178
	-2.13	-3.643
		-1.264
		-1.444
	-1.144
	-1.109	-0.574
		-1.457
	-2.199
		-1.339
		-0.462
	-2.344
	-1.155
	-1.229	-3.385
		-1.94
	-1.476	-2.153
	-1.448
	-0.602	-2.418
	-4.319
		-3.791
		-2.28
	-2.271	-1.663
	-2.591	-2.393
		-4.107
	-2.5
	-2.144
	-2.68
	-1.16
	-3.643
		-1.116
	-0.596	-2.264
	-1.15	-1.339
		-0.885
		-2.038
		-2.425
		-3.943
	-1.22
	-3.529
		-0.436
	-1.15	-2.527
	-0.988
	-1.893	-1.621
	-1.489
	-1.039	-1.148
	-2.722	-2.765
	-1.608	-1.468
		-1.532
	-3.411	-0.648
	-0.922	-1.996
	-1.553
	-2.233
	-1.171	-1.225
	-2.365	-2.215
	-0.569	-2.209
		-1.186
		-2.232
	-3.106
		-1.492
	-0.518
	-3.81
	-1.059
	-0.379
		-2.654
		-0.42
		-2.63
		-2.461
	-1.242	-1.152
	-2.359
	-0.807	-1.499
		-2.574
	-1.106
	-0.405
	-1.989
	-1.196
		-0.547
	-2.252	-0.412
	-3.767
	-2.251	-2.23
		-3.901
		-2.358
	-0.305
		-0.338
	-0.678	-2.068
		-2.095
	-1.055	-2.459
	-1.634
		-2.355
	-0.421
	-2.228
	-1.211
	-1.534	-0.365
	-1.092
		-0.35
		-2.551
	-1.973	-0.545
		-2.249
	-3.037	-1.39
		-2.19
	-0.263
	-2.301
		-2.081
	-0.286	-1.513
		-1.464
		-1.756
		-1.029
		-0.834
		-1.872
		-0.365
	-1.996
	-1.439	-1.217
		-1.363
	-3.234
	-0.846	-1.588
	-2.853	-2.035
	-0.143	-0.287
	-1.053	-0.422
	-0.838
	-0.11
		-0.736
	-2.423
	-3.154
	-0.508
	-2.43
		-0.864
	-1.613	-1.658
		-1.319
	-0.86	-1.421
		-1.664
		-3.319
	-3.193
	-1.04
		-3.375
	-3.322	-2.635
	-3.198
	-1.675	-1.049
		-1.639
	-5.394
	-3.211
	-2.285
	-3.998	-0.179
		-0.387
		-2.679
		-1.339
		-1.078
		-0.335
	-4.508	-2.67
	-2.193
	-1.813
		-2.897
		-2.053
		-2.111
	-0.314
		-2.698
		-2.143
		-1.247
	-2.993
	-1.436
	-1.851
	-2.072
		-1.744
		-1.599
	-2.933
		-2.498
		-2.11
		-0.446
		-0.963
	-0.783	-3.393
		-2.926
	-0.121
	-0.801
	-1.125
	-6.205	-1.982
		-1.541
	-4.316	-1.33
		-1.826
		-0.346
		-2.443
		-0.895
		-0.417
		-2.757
	-0.697
	-1.204
	-0.535
		-0.594
	-1.263	-0.299
	-2.212	-5.118
	-4.059
	-1.491	-0.356
	-4.62	-0.228
	-2.69
	-3.211	-4.092
	-3.425	-0.446
		-0.706
	-0.618
		-1.009
	-0.944
	-0.166
	-0.82	-2.473
	-2.143	-1.699
	-0.845	-2.162
		-0.953
		-2.135
		-1.122
		-0.643
		-1.585
	-0.93
		-1.046
		-2.15
	-0.843	-0.882
	-0.606
	-0.719
	-0.668
		-0.781
	-1.95
	-1.553	-1.612
	-1.785	-0.135
	-1.182
	-2.098
	-0.495
	-1.636
	-1.636	-2.75
		-2.863
		-5.652
	-2.003	-1.737
	-3.338
	-1.814	-1.311
		-0.647
	-2.057
	-1.089
	-2.999
	-0.971
	-0.385	-1.444
		-2.24
		-0.239
		-1.479
	-2.123	-1.32
	-1.591	-1.399
	-1.206	-0.478
	-1.075
	-2.332
	-2.518
	-3.37
	-0.993
	-0.474
	-2.785
	-0.223
		-3.375
	-1.751	-0.979
	-0.534	-1.517
		-1.91
		-1.885
		-0.67
		-1.851
		-0.916
		-0.33
		-2.055
	-3.336
	-2.224	-1.586
	-2.052	-0.756
	-1.831
		-2.349
		-0.236
	-2.214	-2.874
		-0.191
	-1.216	-0.446
		-1.806
		-2.282
		-1.957
		-1.212
		-0.774
		-0.665
		-0.727
		-2.053
		-1.451
	-1.023	-2.608
	-3.416	-2.678
	-4.094	-0.778
	-2.614
	-4.257	-0.298
	-1.554	-1.92
	-2.722
	-3.148	-3.519
	-0.223
	-0.635
	-2.439	-1.369
	-3.501	-3.076
	-3.465
	-0.995	-1.339
	-1.807	-0.195
	-1.639
		-2.024
	-0.298	-3.072
	-2.876	-2.224
	-4.802
	-4.366
		-1.64
		-1.872
	-2.134	-3.732
	-1.364	-3.916
	-5.534
		-1.497
		-2.16
	-0.88	-2.366
	-0.153
		-2.766
	-0.502
		-0.478
	-3.214	-2.435
	-1.128	-0.591
	-2.498	-3.329
		-4.342
		-3.76
	-0.818	-3.373
	-0.972	-2.051
	-2.556	-2.161
		-4.682
		-2.675
	-1.754	-1.829
		-3.705
	-1.515
		-4.013
	-1.249
	-0.128
		-1.027
		-0.986
	-0.708	-3.905
	-2.262
	-1.542
	-1.287
	-1.345
	-1.708	-1.903
		-2.176
		-0.303
	-0.923	-1.4
	-2.559
		-1.67
	-2.095	-0.62
	-0.15
	-0.183	-2.153
	-2.158
	-0.964	-1.034
	-2.756	-0.458
	-2.439	-1.436
	-2.337
	-0.813
	-0.568
	-0.164	-3.891
		-0.937
	-1.484	-1.762
		-0.727
		-0.407
		-1.907
	-2.252	-1.426
	-1.711	-0.927
	-1.259
	-0.713
	-3.594
	-1.961
	-0.258	-2.666
	-1.255
		-2.216
	-0.981	-2.433
		-2.251
		-0.785
	-3.97
		-0.62
	-3.834
	-0.92
	-0.467
	-1.635
	-4.299
	-0.405
	-2.397
	-3.128	-2.603
		-3.15
	-2.742
		-1.541
	-1.808
	-2.804	-2.26
		-1.662
		-1.701
	-1.975
	-4.246
	-1.058
	-3.585	-1.655
	-3.513
	-3.152
	-1.144
	-3.511
	-0.367
	-0.446
		-1.699
	-5.653	-0.198
		-0.799
		-1.278
	-4.588	-0.835
	-2.676
		-2.185
		-1.828
	-5.112	-0.742
	-1.846	-2.673
		-2.467
		-0.291
	-3.082
		-1.746
	-1.526	-3.492
		-2.825
	-1.115	-1.994
	-0.715	-3.415
		-0.862
		-2.455
		-4.716
	-4.588
	-4.442
		-0.186
	-1.119	-0.179
	-0.516	-1.673
		-0.912
	-2.032	-1.673
	-3.429
	-5.282	-4.31
	-3.859	-3.195
	-1.84
		-1.004
		-1.175
		-1.937
		-1.827
		-0.669
		-2.177
		-3.472
		-3.115
		-4.198
		-4.017
		-2.484
		-1.473
		-3.515
		-0.103
		-1.163
		-0.669
		-3.06
		-4.849
		-2.932
		-1.085
		-0.103
		-4.448
		-0.824
		-2.326
		-0.167
		-0.856
		-3.13
		-3.07
		-1.653
		-1.994
		-2.223
		-2.602
		-6.307
		-1.281
		-2.631
		-3.771
		-1.434
		-0.382
		-3.345
		-3.59
		-0.916
		-0.371
		-3.393
		-2.049
		-1.338
		-0.122
		-2.192
		-1.021
		-2.861
		-2.568
		-0.331
		-1.451
		-2.573
		-1.011
		-1.926
		-3.843
		-3.114
		-0.109
		-3.86
		-2.16
		-1.241
		-0.191
		-0.893
		-0.701
		-0.476
		-2.755
		-0.67
		-2.48
		-0.714
		-3.683
		-1.878
		-0.967
		-2.531
		-2.608
		-1.41
		-2.317
		-0.892
		-1.116
		-1.221
		-0.856
		-1.864
		-1.65
		-2.677
		-2.029
		-1.549
		-5.354
		-1.188
		-4.406
		-1.752
		-2.966
		-2.897
		-4.36
		-1.968
		-2.294
		-2.451
		-2.875
		-2.998
		-3.553
		-0.802
		-3.12
		-3.961
		-3.646
		-1.645
		-1.106
		-0.804
		-1.205
		-1.63
		-1.987
		-3.872
		-2.967
		-1.551
		-2.335
		-2.452
		-1.927
		-0.979
		-0.788
		-0.893
		-0.257
		-1.296
		-1.961
		-1.338
		-0.94
		-2.713
		-1.712
		-0.608
		-4.516
		-0.446
		-3.17
		-1.338
		-3.196
		-0.601
		-1.037
		-1.758
		-2.527
		-3.386
		-4.323
		-3.407
		-2.195
		-1.751
		-1.553
		-1.744
		-0.828
		-1.42
		-0.149
		-0.545
		-2.256
		-2.451
		-0.817
		-1.682
		-1.504
		-2.595
		-1.528
		-1.599
		-4.37
		-1.768
		-1.655
		-1.173
		-1.083
		-2.512
		-3.147
		-2.807
		-0.613
		-2.822
		-2.481
		-4.61
		-2.844
		-2.877
		-2.992
		-2.204
		-1.902
		-1.087
		-0.892
		-4.015
		-1.525
		-1.625
		-0.429
		-0.646
		-0.352
		-0.556
		-0.459
		-1.673
		-1.294
		-0.613
		-3.028
		-2.151
		-0.397
		-0.925
		-0.826
		-2.43
		-2.148
		-0.243
		-1.586
		-2.554
		-2.164
		-3.357
		-3.014
		-0.492
		-0.223
		-2.254
		-2.765
		-0.787
		-0.282
		-1.32
		-0.839
		-0.446
		-0.187
		-1.634
		-1.023
		-0.65
		-3.044
		-1.242
		-1.843
		-4.269
		-2.916
		-1.338
		-3.662
		-2.798
		-2.07
		-5.575
		-1.338
		-3.467
		-4.655
		-2.23
		-4.205
		-2.817
		-2.31
		-0.903
		-1.819
		-3.154
		-1.75
		-1.225
		-0.103
		-3.718
		-2.273
		-2.943
		-4.385
		-2.146
		-1.773
[truncated: 82 more rows]
