# Supplementary material for: Huntingtin recruits KIF1A to transport synaptic vesicle precursors along the mouse axon to support synaptic transmission and motor skill learning
Source: eLife. 2023 Jul 11;12:e81011. doi: 10.7554/eLife.81011 (PMC10365837; doi:10.7554/eLife.81011)
Supplement: Figure 6—figure supplement 1—source data 2. [file elife-81011-fig6-figsupp1-data2.xlsx]

## Sheet: Figure S6b-Numb antero vesicle
	Wild-type/sh-Scr	Wild-type/sh-KIF1A	HTT-SD/sh-Scr	HTT-SD/sh-KIF1A
	9.8	8.02	5.87	5.57
	15.84	5.41	9.35	8.83
	14.79	8.41	0.93	9.4
	6.91	4.84	5.59	4.8
	14.08	1.67	8.08	3.01
	16.97	2.35	5.17	10.08
	6.89	1.86	8.03	0
	6.51	2.79	8.74	5.94
	11.69	12.59	12.45	0
	7.28	6.66	7.87	12.39
	4.31	8.84	7.95	10
	3.74	2.27	16.69	4.29
	1.25	2.02	11.55	11.43
	11.04	11.9	10.98	4.28
	5.09	6.17	20.16	7.31
	0	11.09	8.98	5.75
	0	1.59	19.57	8.95
	3.86	8.22	7.44	0
	3.79	0	2.18	7.89
	2.83	2.04	7.9	0.98
	1.56	9.85	10.08	8.19
	0	7.63	11.69	1.32
	6.41	1.13	2.89	4.52
	0	2.28	5.9	5.96
	3.44	0.48	2.62	5.67
	1.24	3.05	4.72	7.03
	0	1.46	13.48	0
	0	3.41	11.97	5.13
	2.57	1.12	9.71	14.56
	1.62	3.58	6.79	9.08
	4.83	2.52	3.83	10.51
	6.32	0	0	14.48
	15.87	0	12.77	13.55
	10.89	1.54	6.06	10.33
	3.57	0.99	7.42	1.95
	6.8	3.32	0	3.38
	4.53	5.64	10.08	3.66
	5.68	9.45	3.65	13.66
	1.39	0	7.44	5.82
	9.49	1.66	4.99	8.41
	4.62	2.44	6.49	8.72
	10.7	0.89	10.59	7.02
	7.37	6.72	5.24	14.71
	6.49	1.82	6.31	15.59
	4.29	2.08	6.1	11.58
	4.37	12.01	5.64	3.27
	9.9	1.46	5.31	5.07
	1.21	2.46	3.7	8.37
	5.73	13	4.79	8.06
	7.78	4.11	3.77	2.34
	10.96	7.61	8.3	4.38
	7.71	8.83	7.46	2.58
	3.61	5.81	2.88	2.82
	12.17	0	6.64	8.98
	7.09	0	9.7	3.94
	3.43	0	3.2	4.77
	4.96	12.65	0	9.2
	0.85	6.53	5.8	3.08
	7.75	1.54	9.06	0
	2.8		10.92	6.2
	2.13		9.42	20.79
	3.46		11.26	14.37
	9.39		8.37	4.55
	7.89		10.25	5.69
	10.78		8.23	14.17
	5.52		4.71	5.76
	6.38		15.8	6.61
	7.28		9	7.92
	0		3.58	0.94
	8.42		10.52	6.39
	10.85		7.22	2.94
	7.47		7.81	4.2
	5.82		5.04	8.92
	3.46		10.78	15.65
	8.13		6.89	6.36
	2.53		8.21	2.8
			7.53	3.36
			5.05	8.85
			9.79	2.03
			4.64	1.77
			9.92	4.91
			8.34	17.66
			8.93	3.72
			7.86	7.05
			3.7	4.8
			6.49	1.02
			13.69
			3.46
			12.4
			9.99
			9.05
			6.93
			4.9
			5.82
			3.78
			11.03
			14.01
			5.4
			15.09
			10.1
			5.19
			7.57
			5.12
			1.85
			11.1
			11.38
			12.39
			7.42
			12.09
			8.42
