# Supplementary material for: Huntingtin recruits KIF1A to transport synaptic vesicle precursors along the mouse axon to support synaptic transmission and motor skill learning
Source: eLife. 2023 Jul 11;12:e81011. doi: 10.7554/eLife.81011 (PMC10365837; doi:10.7554/eLife.81011)
Supplement: Figure 6—figure supplement 1—source data 4. [file elife-81011-fig6-figsupp1-data4.xlsx]

## Sheet: Figure S3c-Linear flow rate
	Wild-type/sh-Scr	Wild-type/sh-KIF1A	HTT-SD/sh-Scr	HTT-SD/sh-KIF1A
	30.56	17.17	53.2	16.2
	42.83	15.46	42.01	18.49
	42.84	19.21	7.54	16.2
	29.16	9.87	22.41	16.25
	46.41	16.71	28.37	12.05
	30.13	30.26	35.94	18.98
	23.31	5.32	51.4	5.26
	56.49	26.59	31.91	26.18
	14.71	25.18	58.08	6.52
	6.94	9.51	37.26	28.67
	7.43	12.63	33.8	25.29
	7.65	23.74	60.23	13.66
	22.23	23.09	45.39	25.7
	8.2	34	55.49	11.88
	2.42	17.61	34.79	19.37
	1.52	33.64	36.48	26.54
	10.58	18.19	29.79	20.04
	8.25	16.96	39.64	1.27
	6.15	4.1	40.09	24.27
	2.52	2.98	20.27	4.07
	1.34	21.4	22.25	25.39
	24.83	15.59	22.48	7.74
	7.15	5.61	31.46	15.66
	8.13	21.54	60.56	16.2
	6.19	3.7	42.13	18.34
	2.42	6.97	31.24	22.29
	1.64	6.82	28.02	4.98
	6.31	10.42	17.19	16.39
	2.61	3.55	19.97	39.58
	7.77	12.3	55.33	34.76
	21.03	6.22	19.52	28.96
	36.82	2.43	22.54	32.2
	25.28	8.45	3.78	40.08
	23.85	4.21	27.63	38.99
	18.82	3.14	11.76	11.75
	13.55	16.52	33.44	11.37
	17.01	12.89	24	16.04
	11.6	17.36	27.09	35.41
	24.74	2.36	27.65	17.22
	28.31	4.55	11.31	19.74
	30.23	5.59	24.32	23.13
	26.02	4.41	16.72	18.62
	22.9	11.34	27.15	30.42
	20.03	3.35	15.4	28.95
	14.56	6.61	13.49	12.66
	22.97	21.1	19.47	14.99
	3.62	5.95	20.55	22.21
	14.57	6.72	29.75	23.85
	26.77	26.21	24.02	27.01
	33.15	14.47	20.27	9.38
	27.7	24.22	18	5.53
	12.11	22.82	31.22	18.72
	27.17	10.9	16.85	24.36
	19.34	0.65	1.75	14.07
	16.69	2.25	14.24	11.2
	15.95	9.98	29.18	31.73
	11.64	19.45	35.15	16.66
	33.85	15.46	24.33	3.43
	18.91	10.45	33.23	15.83
	6.98		41.19	47.37
	9.94		27.18	37.23
	26.99		24.99	15.7
	28.96		21.18	25.9
	26.71		54.88	35.94
	20.25		31.26	17.52
	32.08		33.16	13.23
	19.2		31.94	22.57
	8.74		17.71	14.38
	32.27		26.13	14.2
	28.32		20.09	16.7
	20.36		46.35	15.16
	27.17		28.34	23.4
	13.27		31.39	31.32
	20.94		23.36	18.12
	15.31		30.28	11.16
			21.88	11.47
			17.26	26.22
			33.22	6.92
			28.46	12.05
			27.69	21.39
			21.14	53.98
			9.18	10.59
			32.18	16.67
			30.35	15.86
			10.74	5.23
			29.82
			26.87
			21.34
			25.78
			17.22
			18.04
			11.72
			34.22
			42.12
			25.13
			39.8
			34.45
			18.85
			17.84
			17.46
			14.91
			32.31
			28.26
			51.57
			30.35
			36.12
			30.6
