# Supplementary material for: Huntingtin recruits KIF1A to transport synaptic vesicle precursors along the mouse axon to support synaptic transmission and motor skill learning
Source: eLife. 2023 Jul 11;12:e81011. doi: 10.7554/eLife.81011 (PMC10365837; doi:10.7554/eLife.81011)
Supplement: Figure 6—figure supplement 2—source data 1. [file elife-81011-fig6-figsupp2-data1.xlsx]

## Sheet: Figure S7b-Anterograde velocity
	Wild-type/sh-Scr	Wild-type/sh-KIF1A	HTT-SD/sh-Scr	HTT-SD/sh-KIF1A
	4.179	0.639	3.062	3.204
	0.791	1.084	0.369	1.482
	0.341	0.566	0.356	1.132
	0.471	1.812	2.028	4.087
	1.904	3.558	0.416	3.658
	0.204	1.107	1.802	2.385
	0.287	0.876	1.197	0.861
	0.463	0.64	0.883	2.57
	1.026	0.946	1.011	2.794
	1.953	3.367	1.752	2.559
	1.213	0.408	0.945	0.752
	0.806	1.336	0.512	0.428
	0.268	0.589	0.57	0.52
	0.979	4.239	0.283	0.891
	0.608	2.904	1.448	0.693
	0.295	0.411	1.171	0.431
	2.08	2.527	0.634	0.232
	1.316	1.236	4.952	2.546
	2.723	0.776	4.675	0.243
	0.506	1.001	3.132	3.532
	1.894	3.154	1.198	3.583
	0.891	3.603	2.964	3.415
	2.366	4.315	6.053	3.17
	0.891	2.123	5.293	2.231
	0.682	2.052	2.033	1.422
	2.6	2.349	4.769	0.928
	4.417	2.135	4.921	3.248
	3.032	1.898	3.478	5.704
	4.055	1.035	4.38	5.28
	4.436	0.502	1.703	0.652
	4.017	0.386	0.764	3.445
	2.87	0.535	2.675	4.578
	2.217	0.212	3.4	1.746
	3.244	1.842	4.122	1.49
	3.276	0.908	2.189	0.892
	2.861	3.401	1.649	3.194
	3.138	3.735	0.838	4.294
	2.997	3.602	1.812	0.924
	2.48	1.27	3.568	4.438
	2.889	1.471	0.427	4.084
	2.528	0.13	3.606	1.519
	2.467	0.859	1.263	1.128
	2.42	0.922	2.988	0.936
	3.017	0.926	4.162	4.647
	3.184	0.931	0.669	1.165
	3.622	0.297	4.013	2.301
	3.249	1.863	2.229	1.313
	3.57	0.606	5.481	4.682
	3.583	0.179	1.007	0.706
	3.656	1.721	0.835	4.312
	1.267	0.669	2.008	3.719
	0.848	3.943	1.846	4.738
	0.1	4.168	5.451	3.967
	1.1	4.084	0.374	4.998
	0.987	1.526	3.603	1.636
	1.523	0.716	2.77	0.161
	0.124	1.969	0.765	1.071
	0.315	1.66	2.466	0.959
	1.49	1.21	5.074	3.197
	0.924	0.923	5.411	1.144
	2.819	3.441	0.112	1.978
	1.419	0.511	0.964	3.219
	1.116	1.17	0.434	0.307
	0.824	1.03	1.53	3.599
	2.24	1.095	2.529	0.937
	0.678	0.297	2.195	4.635
	3.09	0.943	3.864	1.364
	5.283	1.896	1.205	0.535
	0.296	0.606	5.802	1.012
	0.444	0.531	0.521	0.951
	0.222	1.204	0.956	1.427
	0.51	3.042	4.831	0.357
	3.724	0.47	3.335	0.587
	3.05	1.284	1.271	1.074
	0.946	1.473	3.288	0.73
	3.96	1.121	3.41	3.027
	3.451	2.295	5.238	1.215
	3.251	2.264	5.179	4.507
	2.91	1.398	1.288	0.471
	0.468	1.529	1.541	1.103
	0.619	1.197	4.571	0.235
	0.736	0.721	5.494	0.578
	0.341	0.264	5.894	1.128
	1.975	1.684	4.794	1.768
	1.158	1.051	4.002	1.024
	2.004	0.23	3.048	1.514
	2.226	1.092	3.745	1.539
	0.111	1.199	0.257	0.731
	1.41	0.975	1.853	0.787
	0.671	0.618	0.568	1.282
	0.779	1.525	0.388	0.502
	2.206	0.191	6.003	0.785
	2.955	1.827	3.096	0.765
	0.682	1.767	4.7	1.115
	4.654	1.881	2.167	0.985
	3.116	0.748	0.365	1.141
	0.643	0.234	2.261	0.521
	2.139	3.784	1.071	0.846
	3.067	0.352	1.071	1.615
	3.097	0.122	0.505	0.864
	1.915	1.337	0.945	0.466
	0.533	2.197	0.315	0.697
	0.21	0.325	0.435	2.98
	0.297	1.204	0.94	2.524
	0.335	0.686	0.892	3.054
	1.004	2.463	0.691	0.435
	3.055	1.807	2.463	3.387
	0.976	0.679	1.064	1.339
	4.756	0.83	1.113	4.21
	0.563	1.337	3.2	1.138
	2.655	0.549	1.273	1.339
	2.005	0.892	0.457	1.006
	0.535	1.727	0.989	2.677
	0.706	2.728	0.335	0.765
	1.902	0.211	1.397	0.892
	0.267	0.302	4.641	2.582
	0.223	1.179	1.407	0.52
	1.337	0.121	0.292	5.577
	0.499	0.131	2.563	0.72
	0.365	1.731	4.094	4.458
	0.791	1.683	0.309	3.553
	2.525	0.708	1.339	2.502
	4.325	1.548	1.273	3.599
	3.208	0.583	0.412	4.037
	0.446	2.756	0.765	3.141
	2.228	1.988	2.767	0.529
	0.313	1.071	2.515	4.26
	0.223	0.669	2.997	0.669
	0.509	2.421	1.99	0.43
	0.729	0.972	1.607	0.173
	0.649	2.931	1.562	3.772
	2.527	1.027	0.971	3.046
	2.403	0.436	0.191	1.123
	0.866	4.804	3.064	4.602
	1.762	1.235	0.586	3.425
	0.934	0.617	1.292	3.541
	0.873	0.219	1.496	0.621
	1.871	0.585	1.626	3.114
	1.962	0.401	2.142	3.185
	0.3	0.416	2.462	4.183
	1.486	0.583	1.694	0.779
	0.542	0.141	0.736	0.714
	2.053	0.355	1.148	1.539
	0.833	1.192	1.317	2.762
	3.571	0.742	0.662	0.297
	0.278	4.333	1.086	4.357
	1.797	3.415	0.159	3.701
	1.228	3.463	3.137	0.977
	0.67	3.454	4.891	3.557
	4.419	2.748	0.787	0.306
	4.158	4.14	4.885	5.289
	3.475	5.309	0.243	5.138
	4.498	0.877	1.058	0.487
	0.86	0.291	4.944	2.932
	1.98	0.127	5.216	3.115
	2.221	1.212	3.567	3.213
	3.542	0.486	2.257	2.869
	1.94	1.783	4.315	2.062
	0.46	0.669	1.329	0.402
	2.567	0.223	3.148	2.975
	4.148	0.141	4.366	2.727
	1.525	0.778	2.859	3.148
	2.168	1.169	0.174	5.456
	2.631	3.802	0.171	1.88
	3.651	0.523	1.872	0.395
	0.689	3.287	0.615	0.504
	0.223	3.506	1.07	0.127
	1.176	1.446	2.675	2.14
	0.221	0.26	5.119	2.032
	2.26	0.75	3.544	0.428
	0.154	0.501	2.407	1.296
	3.443	0.396	0.194	0.466
	0.146	0.474	1.146	1.859
	0.752	0.646	4.393	2.31
	0.18	0.514	4.559	2.684
	0.334	1.397	5.094	3.883
	0.409	2.047	2.995	2.567
	1.49	1.054	1.856	4.737
	1.279	0.697	3.152	3.933
	1.249	1.335	0.287	3.459
	1.266	2.298	1.38	3.644
	0.892	0.662	1.747	1.785
	0.837	0.594	3.18	0.582
	0.926	0.549	0.476	0.536
	0.811	0.483	3.345	2.754
	0.774	0.708	5.619	0.446
	2.368	1.055	0.669	1.547
	0.257	0.391	1.734	0.669
	0.536	1.917	2.485	3.223
	2.494	1.532	4.807	0.837
	0.764	0.869	3.051	4.264
	1.605	2.774	3.938	0.496
	0.689	1.269	2.517	0.3
	0.368	1.974	2.502	0.226
	0.613	0.414	2.555	1.081
	0.501	0.418	2.05	0.818
	1.427	1.704	0.893	1.562
	0.668	0.827	0.57	1.934
	1.67	1.245	0.134	0.109
	1.551	0.747	0.517	0.718
	3.202	0.816	0.837	4.134
	0.502	0.82	2.347	5.131
	1.183	0.773	1.169	1.249
	0.802	2.304	0.614	1.783
	1.743	1.471	0.115	5.258
	2.559	1.907	0.946	4.464
	1.499	1.391	0.487	0.123
	0.9	0.791	0.72	1.099
	3.686	2.272	0.789	2.415
	0.347	4.835	1.005	3.009
	1.347	4.334	0.361	3.826
	1.129	1.519	0.949	3.095
	1.213	0.223	2.653	3.864
	3.51	0.335	1.018	4.092
	1.479	3.299	5.121	3.741
	1.814	5.353	4.608	4.088
	0.616	2.302	2.756	4.071
	1.112	1.155	0.486	5.188
	0.751	1.224	1.076	3.762
	0.204	0.199	1.932	2.936
	2.931	0.116	0.268	2.36
	0.384	0.365	2.453	4.598
	0.107	3.611	0.197	4.887
	2.448	2.388	0.817	4.96
	0.267	0.127	4.504	4.4
	0.238	1.672	4.495	4.174
	0.723	3.584	2.395	4.193
	2.17	3.58	1.48	4.214
	0.25	4.021	0.298	4.586
	1.635	2.106	0.536	0.768
	1.354	0.523	1.127	3.045
	2.827	0.635	1.467	1.624
	1.584	5.021	2.996	0.437
	2.229	0.991	2.552	2.173
	1.123	2.115	2.749	4.726
	0.167	3.351	1.305	0.669
	0.641	0.402	4.027	2.488
	0.352	0.391	3.796	3.826
	2.396	0.488	0.742	2.774
	1.466	0.694	0.171	0.762
	0.223	0.536	0.495	4.808
	1.663	4.84	1.318	5.181
	2.179	1.742	0.1	5.371
	0.151	1.199	2.623	2.882
	0.477	0.148	1.962	3.23
	2.415	2.111	4.255	2.408
	0.61	3.963	2.695	5.074
	2.093	1.675	5.4	1.05
	1.113	1.162	0.968	2.453
	1.75	5.057	0.527	4.466
	0.553	3.753	1.899	1.159
	2.384	1.34	3.602	5.295
	0.281	3.581	4.603	1.932
	0.259	0.573	2.604	1.338
	1.226	4.544	4.632	2.619
	2.632	0.191	4.828	0.38
	2.163	0.872	1.726	0.343
	1.505	0.835	0.554	3.336
	1.507	3.544	0.837	5.817
	1.154	0.314	1.752	2.564
	1.246	0.483	1.078	1.491
	1.512	0.604	0.179	1.512
	0.703	1.627	1.429	1.059
	0.788	2.205	0.893	4.394
	1.209	1.156	2.295	0.223
	0.715	1.336	0.994	0.944
	1.419	3.207	1.116	0.845
	0.668	0.821	1.761	1.409
	0.425	1.18	0.67	2.281
	0.756	1.674	2.868	0.155
	0.243	0.624	3.368	0.736
	0.668	0.129	3.313	0.562
	0.55	0.181	2.046	3.597
	1.234	0.323	0.865	1.047
	0.891	0.307	5.728	1.023
	1.517	1.504	0.683	0.617
	0.576	2.018	4.576	1.646
	1.013	0.203	1.25	0.61
	1.478	1.337	4.979	0.498
	0.481	3.14	0.167	0.416
	1.693	3.323	5.34	0.926
	1.169	2.417	0.893	1.834
	1.594	2.864	3.801	4.132
	1.967	1.182	1.116	0.764
	0.35	3.455	3.181	3.944
	2.042	1.066	0.893	4.354
	0.983	0.326	1.538	2.466
	1.952	3.488	1.591	0.674
	2.906	0.633	0.313	2.786
	0.809	0.89	3.417	4.992
	1.484	1.018	6.45	3.808
	3.526	0.167	1.863	4.892
	0.841	2.56	0.787	3.262
	1.176	0.564	1.052	5.193
	1.898	0.827	0.967	4.529
	1.455	1.335	1.005	2.945
	1.265	1.091	1.339	4.811
	0.616	0.739	1.488	2.15
	1.864	0.511	4.407	3.875
	1.195	1.222	3.815	4.716
	0.682	0.753	0.482	0.713
	1.773	0.872	1.502	3.701
	2.354	0.657	1.704	0.802
	0.697	0.754	1.764	3.044
	1.234	0.333	2.639	3.037
	0.557	1.182	0.346	1.002
	1.456	1.496	0.669	3.564
	0.589	0.538	2.018	4.485
	1.031	1.653	0.986	3.486
	1.529	2.107	3.465	4.749
	2.97	0.223	0.743	4.013
	3.287	1.394	1.212	2.905
	0.236	0.454	0.956	4.682
	4.896	1.659	1.573	4.993
	1.282	5.499	0.461	1.846
	1.668	4.237	0.956	1.895
	4.883	2.353	0.551	4.324
	3.942	4.096	0.683	0.846
	4.893	5.297	0.243	0.502
	2.621	4.541	0.452	1.132
	1.638	0.798	0.756	3.462
	1.675	5.395	3.11	0.163
	2.197	0.572	3.122	4.016
	2.243	0.411	0.908	1.3
	0.38	0.176	1.823	3.743
	0.842	0.431	1.784	2.714
	0.167	1.537	1.386	0.191
	2.492	0.149	2.675	1.221
	1.067	1.637	0.952	0.122
	1.664	0.84	4.013	0.106
	0.325	0.823	1.923	1.652
	4.064	2.526	2.053	0.576
	2.357	1.164	3.155	2.76
	3.676	0.968	5.268	0.335
	1.34	0.635	2.963	3.075
	3.14	0.852	1.929	2.901
	0.419	0.703	0.804	3.055
	0.412	1.115	0.536	2.528
	0.298	1.926	4.526	3.967
	1.723	1.191	1.833	3.817
	3.969	0.637	0.807	1.59
	1.924	3.022	1.467	3.147
	2.554	1.186	0.433	2.678
	2.217	0.525	0.309	0.663
	2.57	1.07	0.304	3.506
	1.159	4.644	0.528	2.038
	3.769	1.862	0.446	3.078
	2.355	2.319	0.335	1.015
	2.5	2.323	4.362	2.752
	3.774	1.872	1.129	4.105
	2.168	1.509	0.589	2.619
	1.996	1.031	1.187	1.533
	1.907	0.82	1.839	2.442
	4.893	0.267	0.191	0.219
	0.504	0.291	0.926	0.558
	0.325	2.088	0.944	2.762
	0.988	0.433	1.266	1.488
	3.671	2.241	2.226	1.13
	1.19	1.448	0.557	1.161
	3.636	0.528	1.288	2.662
	4.083	1.217	3.637	1.213
	1.777	4.747	4.294	3.479
	2.027	3.861	4.263	0.652
	0.223	3.103	2.513	2.038
	0.356	2.159	3.745	3.263
	4.761	0.403	2.818	3.132
	0.447	3.007	4.013	3.471
	2.846	0.582	0.892	1.942
	1.072	0.952	3.043	2.971
	0.995	1.301	1.807	2.285
	1.127	0.897	0.56	2.574
	1.537	1.528	1.277	3.117
	1.054	0.829	2.904	0.753
	0.894	0.695	3.648	1.222
	4.147	1.944	1.248	2.826
	2.073	2.038	0.121	3.125
	1.861	0.585	1.082	2.311
	2.707	0.685	0.85	1.732
	2.514	2.762	1.371	2.024
	2.393	1.448	1.891	2.589
	3.009	0.925	0.103	2.548
	4.07	0.588	1.703	1.374
	1.761	2.005	0.148	2.036
	0.887	0.146	0.115	1.339
	3.764	0.592	0.303	0.243
	3.582	0.107	1.232	0.228
	4.512	0.115	4.375	0.824
	2.27	0.375	3.148	0.17
	2.989	0.756	0.607	1.321
	0.574	1.596	3.866	1.116
	1.004	0.142	4.726	2.206
	0.995	0.514	3.125	0.693
	2.886	0.827	2.058	0.238
	2.656	3.822	0.785	1.475
	2.152	3.521	0.127	0.884
	1.108	0.16	0.272	0.782
	3.346	0.869	3.765	3.436
	3.123	0.517	3.055	1.38
	0.937	3.58	0.286	0.807
	1.638	1.069	0.713	0.198
	2.588	0.401	1.582	0.957
	1.4	1.836	0.763	1.531
	1.224	0.339	3.491	1.249
	2.698	0.979	3.755	0.576
	0.744	1.973	0.215	1.25
	0.694	0.927	4.016	0.268
	1.086	1.403	4.544	0.383
	3.625	0.5	2.626	0.644
	0.112	1.446	0.765	1.359
	2.394	0.281	3.57	0.73
	3.306	1.248	0.382	2.842
	0.751	0.397	4.102	0.709
	0.446	1.281	2.387	2.176
	2.707	0.114	2.367	1.071
	2.595	0.517	4.288	2.933
	0.765	2.001	0.892	0.294
	1.214	0.281	2.295	2.601
	1.022	1.941	1.401	2.074
	1.337	1.456	1.139	0.429
	2.898	1.665	0.946	2.212
	3.462	2.977	3.48	2.249
	0.817	0.392	2.786	0.589
	2.472	0.757	3.519	0.548
	1.711	1.245	0.223	0.143
	0.317	0.379	0.55	0.657
	2.603	1.157	1.61	1.775
	3.19	3.016	1.397	1.4
	4.672	0.389	3.27	1.437
	0.787	1.548	3.818	1.921
	0.447	1.174	3.162	5.361
	1.117	0.359	3.098	0.223
	3.181	2.177	0.463	0.178
	1.838	1.07	0.31	1.09
	0.348	0.669	0.565	0.169
	0.734	3.744	1.336	0.486
	0.832	1.894	4.543	3.802
	0.151	1.07	4.093	0.459
	1.653	0.587	4.577	0.243
	0.238	0.535	2.616	5.212
	0.559	5.198	2.271	6.242
	0.334	5.089	2.728	3.145
	0.883	2.557	4.698	0.181
	0.462	1.455	3.486	0.935
	0.534	4.16	0.594	0.285
	0.953	4.228	0.683	5.157
	2.643	1.136	2.077	4.126
	1.601	0.516	0.535	4.864
	4.419	1.547	0.522	2.381
	3.693	0.812	3.052	1.918
	5.029	1.887	5.212	0.443
	3.812	1.126	3.373	0.561
	0.881	1.949	3.156	4.537
	1.62	0.387	4.051	2.473
	2.916	0.115	4.366	0.484
	3.909	0.504	1.994	0.362
	4.163	2.482	2.227	6.027
	1.758	0.552	4.037	0.226
	0.312	0.418	3.38	0.893
	0.223	3.973	0.501	3.269
	2.753	3.848	0.187	1.078
	1.587	2.533	0.301	2.264
	0.98	0.937	3.395	0.477
	2.768	2.58	0.141	0.721
	3.718	1.188	2.5	0.361
	1.791	1.84	0.404	0.408
	3.723	0.195	5.353	5.358
	3.517	1.222	1.208	1.525
	5.063	0.445	0.73	1.072
	4.507	0.943	0.946	0.395
	4.613	1.463	2.091	2.164
	4.329	1.124	3.091	3.895
	2.264	1.434	0.267	0.99
	3.029	1.517	5.296	0.646
	0.579	0.114	0.595	0.191
	1.211	0.669	0.372	4.042
	2.492	0.655	3.597	2.509
	1.893	0.167	2.677	0.191
	0.667	2.503	1.217	2.139
	1.524	3.915	3.017	0.811
	1.172	1.948	1.004	3.536
	0.978	1.742	2.141	2.711
	1.067	0.959	1.548	3.03
	0.503	1.748	1.838	2.725
	0.908	3.834	1.338	3.189
	2.206	4.283	0.892	1.438
	0.357	0.242	1.338	2.944
	1.058	1.433	0.106	2.676
	2.617	0.579	0.51	1.914
	2.568	1.471	1.337	1.449
	3.132	0.365	0.743	0.823
	1.022	3.436	1.972	0.944
	0.396	0.223	1.002	1.604
	0.493	0.194	3.94	0.487
	2.263	2.049	2.621	3.396
	4.074	2.466	4.45	1.529
	0.126	4.67	2.762	1.795
	1.609	0.725	3.309	0.223
	0.151	0.161	2.108	0.412
	2.83	3.521	4.845	3.389
	2.65	3.953	5.096	1.147
	0.335	0.783	4.641	2.956
	3.666	1.343	0.134	0.554
	2.944	2.029	0.152	1.339
	3.597	0.467	0.893	1.562
	3.156	2.002	4.478	1.249
	4.046	0.458	4.41	1.112
	2.807	1.78	0.814	0.863
	4.168	0.277	0.721	2.388
	0.944	0.784	3.03	3.385
	3.479	0.748	0.67	2.871
	0.199	1.322	0.447	4.147
	1.801	0.445	4.912	4.074
	0.442	2.136	1.695	2.678
	0.711	2.479	0.156	2.211
	1.966	0.158	2.903	0.921
	1.731	2.818	1.072	0.446
	0.939	1.165	4.735	0.968
	0.664	0.913	0.14	1.428
	1.378	3.071	0.385	0.378
	0.633	0.297	1.337	2.271
	0.748	2.895	1.337	0.335
	0.537	0.58	0.393	3.509
	1.302	1.503	2.634	2.589
	4.012	1.655	1.278	1.789
	5.522	0.727	4.482	1.679
	1.204	0.301	0.717	0.206
	2.904	4.752	3.031	0.974
	4.89	3.802	3.811	0.383
	2.378	1.784	3.634	0.558
	2.452	0.944	5.375	1.892
	2.514	3.044	0.446	0.775
	1.831	3.983	0.446	0.643
	4.792	0.339	0.279	3.109
	4.73	5.352	2.842	3.105
	3.622	0.845	1.07	3.138
	0.764	2.676	0.93	0.309
	3.625	1.003	0.848	1.133
	2.088	0.339	3.745	0.785
	0.461	1.147	4.949	0.465
	1.475	0.613	4.273	2.249
	1.733	2.286	2.468	0.738
	2.34	2.968	4.552	1.004
	1.051	5.152	2.27	2.142
	0.563	2.863	1.335	1.095
	2.619	0.734	4.006	4.344
	2.764	2.865	0.134	4.201
	4.937	0.446	1.068	0.122
	2.903	0.136	2.671	0.891
	4.869	0.658	0.144	0.813
	4.793	1.078	0.25	0.608
	0.916	0.294	1.795	1.534
	3.423	0.223	4.2	1.401
	0.445	1.115	3.568	0.802
	0.275	0.612	0.669	3.704
	1.732	2.416	5.107	1.718
	1.782	3.663	1.268	0.799
	3.047	2.763	4.07	2.677
	5.249	1.685	4.166	1.25
	4.125	0.822	2.216	1.926
	3.952	1.799	1.039	0.438
	5.329	1.336	3.122	3.569
	1.652	3.312	1.338	0.916
	1.991	3.007	5.555	0.633
	4.444	1.814	5.652	0.223
	3.97	4.87	0.292	0.283
	4.29	4.415	0.955	0.122
	5.054	4.217	5.414	1.657
	4.947	0.234	5.237	2.467
	4.532	1.005	4.072	3.629
	4.228	4.587	5.364	0.546
	2.286	2.996	4.999	2.604
	3.072	3.508	4.777	4.501
	0.835	3.168	1.534	0.769
	0.373	4.117	3.635	1.867
	0.135	3.839	0.822	0.157
	0.53	0.244	0.534	3.29
	5.002	0.405	4.436	1.47
	1.259	0.206	3.254	0.3
	0.554	0.853	0.795	2.355
	0.88	4.443	2.466	1.363
	1.338	0.814	3.875	4.488
	0.243	0.825	3.132	5.048
	1.142	0.322	2.623	5.152
	1.463	0.596	2.265	5.008
	0.568	4.214	1.338	1.094
	2.297	2.148	1.338	0.803
	1.921	3.766	0.446	3.207
	3.63	0.658	2.198	0.446
	0.89	1.215	0.973	5.116
	1.297	0.314	1.132	5.042
	4.353	4.989	1.016	5.03
	1.017	3.087	2.098	0.782
	3.774	4.141	0.335	1.202
	2.032	3.953	1.308	4.318
	4.044	3.595	0.253	4.013
	4.529	4.719	0.755	3.601
	2.765	3.105	0.175	2.335
	0.118	3.905	0.569	0.865
	3.578	0.638	1.841	0.17
	1.313	4.837	1.874	1.64
	1.706	0.558	0.551	1.879
	3.406	2.343	1.971	4.642
	3.46	0.833	0.803	5.099
	2.551	4.505	3.739	3.947
	0.514	2.744	4.354	0.938
	0.359	1.339	5.407	4.581
	1.131	1.422	3.022	4.962
	2.263	0.698	0.333	5.431
	3.709	1.114	4.253	2.318
	2.643	0.706	5.006	5.426
	0.501	0.243	3.618	4.728
	0.673	1.969	4.03	6.268
	2.213	3.954	3.842	6.083
	3.602	2.774	4.329	3.741
	2.417	1.528	0.268	3.931
	2.757	1.71	1.076	5.764
	1.488	0.719	1.499	4.796
	0.437	3.979	0.606	5.353
		0.478	5.57	1.081
		0.82	0.223	4.158
		1.235	3.682	1.566
		4.274	3.953	4.104
		1.733	0.615	4.771
		1.291	0.996	0.281
		0.868	3.634	5.687
		1.39	1.116	4.907
		2.93	0.388	0.66
		2.411	1.407	4.437
		0.868	0.574	1.673
		0.335	0.268	2.841
		2.146	1.658	4.416
		3.651	0.64	3.517
		3.081	1.421	2.837
		1.289	1.081	4.104
		3.393	0.229	5.596
		0.804	0.432	3.623
		4.121	4.391	1.946
		3.789	1.089	3.643
		4.142	3.642	3.994
		1.443	2.764	5.902
		0.504	1.232	2.787
		2.55	2.779	0.544
		2.215	2.029	3.443
		1.767	1.337	1.26
		3.024	0.178	4.563
		0.664	2.178	2.871
		0.57	4.394	0.67
		0.51	5.078	0.536
		0.893	4.339	1.196
		3.118	0.745	1.007
		4.237	4.215	0.721
		3.533	3.93	0.446
		3.67	0.455	0.282
		2.514	3.602	0.412
		4.648	5.823	0.793
		0.468	0.501	0.566
		2.93	0.752	1.65
		3.352	0.829	1.68
		0.447	3.578	1.836
		2.095	0.157	0.605
		0.935	4.339	1.711
		3.093	1.162	0.893
		2.795	0.767	0.956
		1.179	0.38	0.803
		2.451	0.268	1.133
		0.408	1.133	0.739
		0.464	0.935	0.57
		1.666	4.155	0.415
		2.236	3.722	0.253
		0.805	0.564	1.73
		3.354	0.833	0.932
		2.161	0.383	0.83
		0.475	1.081	1.47
		1.389	1.224	1.62
		0.712	0.714	3.016
		1.461	0.561	3.887
		1.461	4.909	2.324
		0.946	4.515	2.083
		1.95	3.417	0.535
		3.71	1.156	0.843
		1.752	0.875	2.676
		2.595	0.365	0.144
		2.965	0.761	0.892
		1.988	2.353	1.874
		1.518	4.045	3.726
		1.196	1.934	1.873
		1.097	3.018	1.78
		2.724	4.402	0.865
		0.635	5.286	0.211
		1.049	1.115	1.338
		1.303	2.358	1.32
		0.511	0.898	1.048
		0.212	0.588	0.708
		3.164	3.969	1.684
		5.348	4.681	0.376
		0.446	5.114	0.382
		4.035	4.625	0.276
		1.508	4.437	3.298
		3.867	5.843	0.111
		1.203	0.607	1.892
		0.741	2.455	0.219
		3.64	4.59	0.594
		2.35	5.743	1.051
		2.004	4.53	0.864
		4.738	3.292	2.951
		0.463	4.849	2.937
		1.203	5.048	1.744
		0.742	1.462	0.324
		1.018	0.811	0.58
		2.595	1.291	1.649
		2.316	0.407	0.527
		1.222	1.506	1.626
		2.316	0.558	0.563
		3.289	1.159	1.674
		0.382	1.419	1.553
		4.623	0.956	4.463
		2.7	1.461	0.446
		3.834	0.932	2.678
		0.584	2.165	3.174
		0.698	1.624	1.423
		2.411	1.645	1.913
		1.202	1.496	1.649
		2.344	3.32	2.4
		2.679	1.623	3.321
		0.921	0.669	0.785
		0.344	1.647	5.138
		4.376	4.44	3.841
		3.123	3.192	3.801
		0.804	4.147	0.134
		5.01	0.669	2.995
		4.09	0.274	0.199
		3.683	4.311	1.003
		2.997	2.408	3.588
		2.597	0.178	2.339
		0.67	4.433	4.201
		4.939	1.756	2.005
		3.822	4.749	0.411
		5.53	3.413	4.679
		3.951	1.187	0.131
		3.179	4.049	5.456
		4.699	2.928	1.278
		1.586	0.636	0.493
		5.091	4.28365	1.602
		3.771	1.61522	0.177
		0.797	2.24501	4.006
		0.784	3.65221	0.624
		1.659	2.83591	2.954
		3.092	3.59199	0.572
		0.766	3.74801	3.038
		2.025	2.41286	3.834
		0.79	1.46124	4.416
		0.536	1.20019	0.716
		4.019	1.8265	0.515
		3.802	2.05205	2.582
		4.382	2.344	0.524
		1.042	1.15488	3.651
		0.261	0.569768	0.212
		1.34	0.157798	5.355
		0.191	0.144021	1.049
		0.156	0.691417	0.727
		2.097	0.336749	4.634
		1.795	0.659424	0.462
		0.446	2.18114	0.577
		0.772	0.341791	0.691
		2.45	3.00687	0.539
		3.179	4.78515	2.532
		1.551	2.64359	5.467
		0.462	2.7495	3.674
		0.191	4.14601	2.327
		1.718	0.186543	5.601
		1.182	1.39885	3.927
		2.759	3.23893	2.535
		0.703	1.09359	5.279
		0.515	3.18558	0.495
		0.466	3.20091	0.755
		1.733	2.53383	0.592
		0.175	0.909091	1.566
		0.949	2.26374	3.92
		0.829	0.468934	0.803
		3.389	1.79156	1.372
		4.436	0.426965	2.099
		5.146	3.10632	0.273
		4.253	0.634361	0.285
		1.135	0.637538	3.473
		0.15	0.735593	0.47
		0.446	3.78436	3.627
		0.809	3.6743	1.338
		1.007	4.02273	4.574
		2.951	2.93552	5.272
		2.571	4.34574	4.673
		2.964	5.46225	0.82
		0.904	3.17064	0.307
		3.341	3.1811	4.686
		3.892	1.2235	4.452
		0.222	1.64537	0.282
		3.363	3.917	3.621
		3.745	2.88093	0.217
		2.807	0.613333	4.853
		0.553	4.81191	3.701
		2.754	1.13665	2.556
		1.569	0.9295	4.877
		0.164	3.40829	1.853
		1.793	0.462947	0.762
		2.113	3.25157	0.353
		1.484	0.567518	0.778
		2.679	0.367557	0.852
		1.447	0.380273	3.873
		1.053	4.0521	3.104
		3.137	3.72795	3.415
		0.536	3.14879	1.245
		2.296	2.36517	0.327
		2.72	0.137749	0.573
		0.574	2.23409	0.445
		0.845	4.54454	3.377
		0.63	1.73966	2.847
		0.949	3.31613	0.853
		4.362	3.39584	5.001
		3.872	3.25184	4.055
		3.944	4.05638	0.781
		1.325	2.14702	0.83
		2.482	2.41079	1.389
		0.823	2.92288	2.207
		2.495	1.96831	3.076
		0.891	3.5724	2.675
		0.267	3.11404	3.478
		3.193	3.0029	0.136
		1.564	1.32302	0.141
		1.609	2.29525	4.754
		0.192	1.14118	6.162
		3.102	2.86134	1.086
		0.708	2.8505	4.874
		0.245	3.44803	0.714
		0.549	2.96797	4.558
		1.973	1.24334	4.913
		0.585	1.95961	5.455
		2.746	3.29631	2.915
		0.875	3.83579	2.6
		2.011	2.38851	1.187
		1.665	4.61329	0.98
		3.383	1.55526	1.71
		2.497	1.29036	2.282
		1.43	0.345377	3.149
		1.705	0.307079	2.861
		0.397	0.567637	3.344
		1.92	4.20314	4.986
		4.176	2.54574	3.505
		2.426	3.4452	0.78
		5.642	4.07293	2.721
		0.583	4.73391	1.292
		3.608	4.85775	3.848
		1.47	4.277	0.518
		0.417	4.97123	0.487
		0.742	3.60626	2.454
		0.911	2.75488	0.693
		1.336	3.9161	1.088
		0.597	3.60019	3.322
		3.296	3.18335	0.167
		3.166	2.03585	3.865
		3.481	2.27386	0.551
		4.614	3.18041	0.34
		5.028	4.24311	0.112
		3.826	4.57683	0.178
		5.431	3.26521	2.677
		5.296	5.17942	3.69
		4.712	4.53194	1.678
		5.664	2.84231	2.605
		4.877	2.41177	0.669
		0.889	1.44997	2.799
		2.231	1.46198	0.653
		0.629	0.96289	1.024
		2.567	1.3292	2.017
		1.83	1.63122	1.052
		0.925	2.8048	0.386
		1.41	2.77702	3.1
		4.821	0.146964	0.608
		3.718	0.312729	1.409
		0.486	2.61573	0.268
		5.454	1.02859	1.711
		3.636	1.38331	0.951
		4.975	1.38747	0.472
		2.361	3.09244	0.183
		2.699	0.52965	2.028
		2.077	0.568208	3.059
		5.609	1.1358	2.008
		0.88	0.963794	3.235
		0.85	2.84392	1.255
		1.688	1.72237	2.384
		2.676	2.96926	2.404
		0.208	1.91476	4.034
		4.57	0.259247	4.81
		4.869	2.67278	1.25
		5.059	1.89731	4.019
		4.01	3.40797	1.247
		3.44	2.23901	0.982
		0.194	3.43316	0.335
		4.386	3.99867	4.308
		3.641	2.88367	2.333
		3.038	3.22845	0.53
		1.756	0.9997	1.223
		3.853	0.540496	0.625
		0.621	0.631831	4.138
			0.415045	2.87
			2.30585	0.268
			1.42081	1.417
			2.06117	4.058
			2.87965	0.536
			2.71643	4.375
			1.14264	4.206
			0.487065	3.661
			0.19819	3.186
			0.323542	0.112
			0.93267	4.253
			2.89692	4.253
			3.66844	1.201
			1.10208	0.536
			1.95662	3.126
			0.260746	2.208
			0.454453	1.34
			1.53833	0.635
			0.56839	1.496
			1.47621	1.121
			0.758681	2.567
			0.377714	5.173
			3.0511	4.381
			1.96745	3.478
			0.414056	0.872
			1.28271	4.548
			1.66221	0.178
			3.86046	0.833
			3.9351	2.591
			3.41051	2.081
			3.59125	1.21
			4.21031	1.314
			2.83109	0.669
			4.73053	4.886
			3.77095	2.548
			3.31072	4.21
			3.86711	2.41
			4.14237	0.256
			3.45984	1.707
			4.81478	0.352
			3.91066	1.301
			2.46741	0.45
			3.52857	1.339
			3.2613	2.104
			0.66383	1.444
			0.335047	2.1
			0.607233	1.562
			3.99022	1.223
			3.78416	5.413
			0.462507	3.902
			1.24438	3.118
			2.09529	2.274
			2.57806	2.106
			1.0079	1.658
			1.0751	1.287
			3.10314	1.039
			2.3664	3.521
			2.12141	4.994
			3.2167	0.273
			3.08917	4.073
			3.10891	0.349
			3.02373	0.439
			2.76575	1.352
			1.85989	0.486
			2.58161	0.969
			3.1824	3.728
			3.86431	0.157
			2.97492	4.087
			2.31144	3.181
			3.89761	0.208
			1.02014	1.022
			1.5028	0.67
			2.18657	1.802
			3.16457	0.727
			3.02278	3.653
			3.73033	5.762
			2.76575	0.365
			0.756849	1.815
			1.49534	5.216
			5.08109	4.28
			4.40416	5.329
			4.00508	0.21
			3.24254	0.892
			3.80754	0.867
			0.796662	0.334
			1.36466	1.246
			2.30564	3.674
			3.672	0.338
			0.898692	0.731
			1.12851	2.808
			2.30536	0.134
			1.57187	1.756
			4.00462	0.738
			2.39559	0.715
			1.61477	2.161
			0.294372	1.338
			3.47032	3.815
			2.58835	1.887
			2.91217	1.333
			3.52781	1.204
			3.39693	5.084
			4.54591	2.264
			3.16083	2.87
			4.18066	0.903
			2.60911	0.563
			4.32931	4.268
			3.11744	5.908
			2.81462	0.573
			0.502128	0.196
			3.43352	2.181
			0.776869	2.821
			0.567593	1.498
			2.81409	0.356
			3.38097	4.567
			2.78245	1.337
			3.86796	0.535
			1.74904	0.178
			0.555977	3.541
			1.54631	0.329
			4.39534	3.521
			3.70289	0.55
			3.29374	1.645
			4.60709	5.652
			1.29575	3.138
			0.197591	2.523
			1.7173	2.716
			1.89841	3.411
			0.676666	1.3
			0.758696	1.495
			3.22562	1.076
			0.955158	0.575
			0.622008	2.125
			2.55215	0.457
			0.277526	0.814
			3.01799	5.44
			1.67917	5.029
			0.716416	2.406
			1.09911	0.223
			0.522661	0.383
			3.92264	1.751
			0.935028	0.287
			1.04067	1.27
			3.70741	1.907
			2.548	1.27
			0.28466	1.244
			0.890916	0.753
			3.54632	1.171
			0.350404	1.148
			1.58858	1.447
			2.99886	1.836
			0.499901	2.466
			3.29875	2.582
			0.581977	0.701
			1.80662	1.626
			0.945943	0.515
			1.42355	5.26
			4.32984	4.226
			0.236723	1.573
			2.94256	2.075
			1.4201	0.487
			1.47823	2.52
			2.48906	2.42
			3.69168	2.592
			3.92427	0.959
			3.2263	1.164
			2.27376	0.347
			0.324801	0.714
			1.66502	1.07
			2.65267	3.684
			2.66183	0.487
			1.14371	0.191
			3.25404	1.487
			4.19209	0.735
			2.56601	2.677
			1.00561	1.136
			0.603702	0.964
			0.40353	1.323
			2.12932	0.455
			0.640368	1.397
			2.64934	0.303
			3.68648	5.355
			1.90233	3.618
			4.42999	0.892
			3.20607	2.312
			4.22659	0.688
			3.15006	0.624
			3.34337	0.255
			4.42184	2.289
			3.26523	1.339
			0.731052	3.862
			1.77105	4.351
			3.85758	0.613
			1.97619	1.339
			2.56913	1.855
			2.31581	3.481
			3.68326	4.602
			0.984858	1.211
			1.1322	1.309
			1.16418	3.288
			2.09124	3.556
			1.85944	0.32
			0.609655	2.614
			0.427224	0.304
			3.8737	2.648
			4.19027	2.908
			1.00028	0.203
			3.18543	2.246
			0.95517	4.551
			0.601169	3.501
			1.56992	0.293
			3.50924	2.662
			1.57148	4.273
			4.05389	4.004
			2.77474	0.247
			4.54538	2.569
			0.147714	4.891
			1.50419	1.856
			0.521611	1.133
			1.13893	3.941
			0.903806	2.107
			3.20391	0.312
			3.50042	2.322
			2.80423	1.662
			1.68402	2.511
			4.17132	1.233
			3.73972	3.061
			2.27117	1.197
			1.9255	2.8
			0.361373	1.302
			1.76145	1.205
			0.519721	2.008
			2.83371	1.209
			4.67374	0.18
			3.73039	0.157
			4.25269	6.358
			1.1388	0.486
			1.20495	3.681
			0.438388	3.197
			3.88939	0.375
			1.29687	4.604
			0.390103	0.483
			0.729536	0.353
			3.96081	0.142
			3.41062	0.106
			4.1857	1.384
			3.80425	1.237
			4.36566	1.285
			4.2415	0.847
			4.68975	0.731
			2.85337	1.539
			4.89365	3.448
			3.04119	1.106
			4.70995	2.618
			3.74238	0.656
			4.26326	0.267
			0.382803	1.978
			0.359939	2.841
			0.521387	0.561
			1.37449	2.674
			2.64103	0.176
			2.64209	2.473
			1.45743	4.473
			2.69682	4.91
			1.14777	3.069
			1.11298	5.151
			2.46669	5.75
			3.47092	0.742
			0.628673	0.909
			1.07139	1.045
			0.614469	1.138
			2.30032	0.675
			1.55812	3.499
			2.58989	3.434
			2.47087	3.959
			1.9569	3.146
			2.13742	1.833
			1.90098	4.229
			2.59327	4.301
			1.45882	4.687
			0.627056	2.035
			2.57515	5.158
			0.569925	3.862
			4.10895	3.801
			2.51296	0.312
			4.09586	0.843
			2.44511	0.492
			0.590477	1.913
			1.69202	4.104
			2.08417	0.67
			0.781584	0.45
			0.495575	0.118
			2.38925	0.957
			0.914221	1.64
			1.39109	0.95
			0.427762	3.435
			1.49476	3.075
			0.98375	0.602
			0.868888	2.983
			4.16867	1.71
			0.40783	1.142
			1.13656	3.157
			2.75013	0.17
			3.20046	0.343
			3.32437	2.812
			3.53134	9.374
			0.261199	1.316
			0.396058	1.339
			1.13683	2.56197
			2.79408	2.9978
			3.06952	4.13611
			3.1038	3.65677
			1.98874	5.12819
			1.25782	1.22246
			3.59155	1.59688
			0.566725	2.77616
			2.95901	1.94897
			0.337171	2.62407
			2.51653	4.08113
			2.64565	3.17417
			0.385747	2.99604
			0.681305	1.77383
			0.566878	1.963
			2.30665	2.97162
			1.21626	3.65521
			4.01574	0.173539
			0.329097	1.42633
			4.54588	0.928672
			3.2345	0.144169
			3.50522	2.9849
			0.439372	2.98752
			3.40941	3.05175
			1.59519	0.591598
			0.237302	2.90362
			0.713407	0.1967
			0.24608	0.743394
			0.195121	0.559443
			0.493707	0.383594
			2.52038	3.02608
			0.701932	0.188818
			3.4515	4.32233
			3.88595	2.16389
			1.73394	5.19979
			2.47496	3.44455
			2.21249	4.18447
			2.62149	1.69268
			3.38232	0.870077
			4.41216	4.4109
			0.777332	0.627155
			4.62172	1.93178
			3.653	0.729024
			1.21777	2.10011
			3.44605	1.13051
			0.865961	1.80326
			1.78701	2.45069
			4.64927	0.243843
			0.579957	0.428029
			2.40942	2.06361
			3.78815	2.43383
			2.34127	1.0222
			0.543527	0.569537
			2.17355	2.05006
			2.49718	1.12125
			3.27531	4.4477
			1.77172	3.84989
			0.559825	3.71528
			1.81198	0.87164
			3.35538	4.18771
			1.20935	2.88533
			0.37028	0.497159
			1.57001	3.03117
			3.02918	1.15343
			4.21693	1.37551
			4.22275	0.448555
			3.95042	0.882431
			3.57577	1.87112
			2.69459	0.904271
			3.13459	2.97877
			2.06824	2.9545
			2.29091	4.69276
			1.84568	0.687416
			2.51112	3.88064
			3.53496	3.38999
			0.282726	2.3846
			2.32934	1.73069
			0.351773	1.55376
			1.49256	3.51626
			2.27596	2.66845
			3.18302	1.44893
			1.19908	1.37899
			1.12974	3.84833
			0.673635	3.05875
			0.924336	2.67658
			3.1863	1.53729
			3.75877	0.541087
			3.98287	1.82682
			2.00122	1.4449
			0.679443	3.67461
			3.41123	0.678672
			0.757035	3.53466
			0.325484	3.32007
			0.491602	2.63551
			0.354623	0.775422
			2.16819	1.46125
			1.92908	0.354918
			0.4386	3.02662
			0.940503	2.29438
			3.08421	1.53952
			2.64218	0.966801
			3.34777	1.04974
			0.380307	1.918
			1.86093	2.32633
			2.44559	0.83521
			1.0466	1.80697
			2.857	2.63456
			1.83798	2.42269
			0.795647	3.65185
			3.80098	4.58415
			3.30517	2.03044
			3.7692	4.06083
			3.62547	3.12076
			3.61769	4.25251
			4.07542	1.65231
			3.05361	4.90037
			0.22823	5.09266
			2.04991	0.852352
			0.466211	0.13348
			2.17288	0.36448
			1.23726	1.39421
			2.3508	3.22756
			0.161577	4.03956
			0.710364	1.03647
			0.167999	3.70397
			1.29782	3.29973
			0.356583	3.46661
			2.00173	1.02433
			0.764245	3.12965
			1.4954	3.87033
			0.24987	3.53575
			0.37882	1.86455
			2.27394	0.93241
			3.34406	5.40595
			3.82146	3.57677
			1.30713	3.30549
			2.27393	2.88895
			1.06315	2.06955
			3.28616	1.46717
			4.47389	2.38059
			2.86834	0.152453
			3.24331	3.74111
			1.31285	3.14683
			3.97872	0.864147
			3.23992	2.79725
			3.68418	0.586678
			3.2006	0.535542
			0.463824	1.50355
			1.3322	0.872372
			1.93267	1.28882
			0.726275	1.34504
			0.593966	0.656632
			0.47231	4.43782
			1.17054	4.10859
			1.10326	2.95611
			1.14098	3.40481
			0.133635	1.98075
			0.628328	4.10876
			2.27363	3.15828
			1.66878	1.0243
			3.21564	2.00182
			2.12789	0.852743
			2.58573	0.975022
			0.846058	1.07888
			5.20875	0.612952
			2.14961	0.23354
			0.933105	0.650434
			0.287102	5.03999
			0.258899	3.15226
			2.01912	2.93388
			1.01498	3.03995
			0.568182	4.56399
			0.703184	2.33287
			1.15396	0.743503
			0.454714	1.55473
			2.23313	5.6305
			3.98329	5.213
			3.21819	4.69463
			3.45103	3.69864
			3.91595	1.95445
			3.97127	3.96731
			2.47169	2.95707
			4.47525	2.64108
			3.29795	4.12539
			3.00127	2.49994
			2.9835	1.49346
			3.53317	3.41409
			3.12669	4.11708
			1.96314	0.992033
			0.932271	2.682
			0.389085	0.995847
			0.3315	2.38709
			0.789286	0.453717
			2.2416	4.00979
			0.66813	1.6013
			0.576202	2.29304
			0.427685	1.59759
			4.65985	4.28128
			3.55509	3.34302
			1.75739	2.67009
			0.759564	0.649119
			1.53486	0.344144
			0.636251	3.88748
			0.185391	2.90373
			0.439758	4.42447
			2.45091	0.950134
			3.93827	1.13796
			3.73837	1.34572
			0.884108	1.3424
			0.934581	3.88537
			0.911678	0.230637
			3.14981	5.07818
			3.32484	3.23936
			3.86854	1.43595
			2.54026	3.7926
			3.73922	1.79929
			4.29471	3.29527
			4.27006	2.39079
			3.8864	3.7284
			3.86523	0.282118
			3.54129	3.11216
			2.30069	0.366081
			3.18316	3.45386
			1.7453	0.436918
			2.27363	0.571366
			2.74733	0.806499
			2.66712	1.24918
			1.62103	0.405785
			0.723057	0.486571
			1.75436	1.8728
			0.31098	1.49692
			0.227865	3.5252
			0.815159	3.66074
			0.404749	4.66718
			0.889699	4.37606
			3.75257	4.32807
			2.86938	3.97629
			3.40974	4.11816
			3.19615	4.08448
			3.87239	3.65463
			1.93524	2.99703
			2.88517	3.7156
			3.672	2.87044
			3.42838	4.28225
			1.41225	2.10328
			2.34888	0.938041
			0.252822	2.93502
			0.60684	0.566157
			0.133674	0.337005
			0.816625	0.455489
			0.932141	0.997244
			1.47266	4.39713
			0.706944	3.43966
			0.302614	2.72461
			3.55432	2.96526
			4.19368	4.19175
			2.55251	0.637417
			3.21043	1.32305
			3.82353	3.84879
			3.64839	4.02582
			3.53398	2.73401
			2.71165	3.97322
			2.99482	3.18403
			3.57479	3.96465
			4.748	0.855392
			4.60991	3.98005
			4.13743	1.84795
			2.06204	2.14515
			1.86048	1.15241
			0.418654	0.930556
			0.716712	4.3212
			0.633951	2.32058
			0.365028	1.5062
			4.54783	3.95649
			3.09136	5.3669
			4.548	2.47056
			2.17186	2.91441
			1.86272	3.81225
			0.661507	0.532912
			0.557063	2.6401
			0.170438	2.57373
			0.378607	2.58558
			0.95732	3.0225
			1.37499	4.53352
			3.29493	2.88058
			4.51309	1.04194
			3.34057	3.02219
			1.43963	2.63986
			3.36779	3.72221
			3.53724	4.95612
			4.57694	0.646626
			1.64333	0.481749
			1.88151	3.7739
			3.04568	3.06285
			4.446	1.71267
			2.02445	3.48599
			3.76211	3.59965
			3.52008	0.721979
			3.57259	4.19751
			3.11883	1.90984
			3.939	0.204402
			3.50655	2.65479
			1.76489	2.14919
			3.83577	2.81596
			3.30922	1.33396
			4.1681	3.38809
			3.21725	0.137946
			0.142276	2.60587
			3.79097	2.19722
			3.54855	4.3615
			1.67609	2.76343
			1.5157	1.41637
			1.26387	0.980722
			1.109	2.32851
			3.9874	1.79425
			0.67854	1.13734
			1.58617	1.40335
			0.803374	0.995459
			0.632286	0.745778
			3.18924	4.91942
			2.64782	4.74585
			1.75926	5.0276
			3.24179	4.27823
			0.339804	3.34302
			2.0006	3.86703
			1.02604	3.36758
			2.42944	2.66521
			3.31599	5.12411
			3.12657	2.62151
			2.95406	0.725292
			2.96008	1.35597
			0.840909	0.556789
			3.48421	1.58989
			4.48933	0.431254
			3.76814	1.40247
			3.00029	0.605188
			1.56325	0.833745
			1.17207	5.99374
			3.09017	4.29167
			3.36527	3.7691
			3.37833	4.12914
			0.96149	2.457
			0.963782	3.28018
			1.774	1.77148
			2.69512	4.52725
			3.86024	3.28924
			2.58301	1.14144
			2.32793	0.313194
			3.68981	0.144444
			0.625926	0.992179
			1.22155	0.905858
			0.571895	0.893007
			1.28132	1.79266
			3.33148	2.55724
			0.759945	1.92209
			3.57263	3.56913
			3.63247	2.54227
			3.78136	4.21788
			1.55263	3.62914
			1.36131	3.4645
			1.56558	2.97518
			1.17241	3.11764
			2.58485	3.48045
			4.74472	3.42701
			4.67825	2.71477
			2.60784	5.41298
			2.17021	3.78517
			4.23697	3.93083
			3.71697	3.90523
			3.55697	3.37605
			3.84903	1.18517
			3.06433	0.936247
			3.34714	1.38636
			3.32904	3.28922
			1.28398	1.1587
			2.65818	4.70131
			0.663976	2.80165
			0.405772	2.63473
			1.12669	2.06604
			3.75754	2.68307
			2.27338	4.17426
			1.86505	2.66723
			1.52639	3.69988
			0.581624	0.484308
			0.879906	0.394793
			0.938631	0.462913
			1.83438	0.243611
			2.22023	1.5305
			0.694544	4.49955
			2.40006	1.0676
			3.70536	0.988684
			2.70582	1.99724
			1.06791	0.978093
			1.92796	0.310227
			1.42409	1.07463
			2.11392	1.07484
			2.74124	0.975774
			0.530036	0.661496
			1.25078	0.717482
			0.411691	3.59029
			3.50896	3.67213
			3.1455	3.29558
			0.331651	3.16041
			1.59322	1.52341
			2.43397	4.03824
			1.31387	0.907584
			4.0419	0.47219
			1.13524	2.64418
			0.591217	3.8532
			3.98622	3.68832
			0.822645	2.97832
			0.285428	3.70485
			4.06343	2.79302
			2.49902	3.60863
			0.476899	4.00218
			4.1718	0.352648
			3.14352	3.07229
			3.09441	2.4635
			2.04869	3.74967
			2.1434	3.03763
			2.21949	1.61965
			1.84289	1.44451
			3.60235	0.93199
			0.655508	0.603506
			0.943155	0.401343
			2.50263	0.935089
			2.11659	0.827789
			4.05572	2.81761
			2.33156	3.45696
			4.69719	1.68572
			2.40163	1.81961
			4.2471	1.05238
			3.16898	2.33926
			0.189229	1.35465
			0.691509	1.93231
			2.66943	4.03929
			3.97948	3.72831
			1.64574	2.77485
			4.64012	1.05696
			4.0093	0.608872
			4.86769	3.56016
			0.599858	2.86575
			2.3521	3.17601
			1.8161	1.30556
			0.827064	0.327594
			0.780403	4.57636
			1.52588	3.88212
			2.81782	4.54484
			4.80486	4.77471
			0.939306	3.78733
			4.19009	4.26839
			3.35627	2.35603
			0.396058	0.618625
			0.193742	3.76206
			0.142031	3.94758
			2.3631	3.31773
			3.64991	3.52813
			4.58113	3.47967
			4.65459	4.39328
			3.12644	3.52098
			1.63115	4.32343
			1.6369	2.05029
			0.428485	4.37737
			0.649071	1.21252
			0.195337	0.499945
			3.81891	1.22728
			1.41694	0.669742
			0.54944	2.27242
			3.66925	0.618711
			0.918806	0.565824
			1.34618	0.37934
			0.612159	1.89849
			0.822353	0.952984
			1.80229	1.94663
			1.02943	2.37565
			0.782919	0.158533
			2.21279	0.889706
			2.45369	1.08387
			0.956848	2.03967
			0.86196	3.7914
			2.53718	4.47745
			2.84267	2.17985
			1.0223	2.31978
			0.253025	3.80946
			0.158559	4.05738
			0.509633	0.916885
			1.56778	1.72589
			2.66971	0.231026
			2.5879	3.40391
			1.02418	2.97174
			3.28779	1.17775
			1.69988	3.45679
			3.30157	3.56609
			2.7805	0.409999
			2.51104	3.67284
			3.40943	3.11477
			0.327621	1.57125
			3.97488	3.15575
			0.976286	1.0475
			2.19171	1.62825
			0.568291	1.92428
			2.02111	3.60185
			1.25722	0.970284
			2.6741	1.11316
			2.28159	2.38184
			2.1754	3.28491
			0.980399	0.376989
			5.23085	1.66899
			2.95657	2.53429
			2.93025	2.18537
			5.18686	2.25051
			4.147	0.881651
			1.74565	3.0964
			3.78715	2.81803
			2.6481	2.62507
			0.227114	1.42814
			0.606293	3.86255
			2.46956	1.61567
			2.93495	0.31454
			3.41495	2.91908
			3.53405	0.329192
			3.99798	1.53012
			0.730853	2.1158
			4.74255	1.7616
			2.028	0.490953
			1.53363	3.24746
			0.138699	1.25065
			2.84392	2.59139
			1.72237	3.54867
			2.96926	3.10272
			1.91476	1.85863
			0.259247	1.846
			2.67278	3.53484
			1.89731	2.19946
			3.40797	0.554459
			2.23901	3.39482
			3.43316	5.17378
			3.99867	0.575101
			2.88367	0.947674
			3.22845	1.54714
			0.9997	1.02657
			0.540496	5.36778
			0.631831	5.15688
			0.415045	1.40477
			2.30585	0.36387
			1.42081	0.812793
			2.06117	1.08984
			2.87965	0.782989
			2.71643	3.56724
			1.14264	0.463057
			0.487065	3.29163
			0.19819	0.956686
			0.323542	2.00972
			0.93267	3.73308
			2.89692	2.03222
			3.66844	3.61804
			1.10208	0.712534
			1.95662	3.43596
			0.260746	3.19088
			0.454453	0.616795
			1.53833	3.3246
			0.56839	4.58766
			1.47621	0.173274
			0.758681	0.379456
			0.377714	1.05559
			3.0511	0.203357
			1.96745	1.03938
			0.414056	2.6065
			1.28271	0.948851
			1.66221	0.284356
			3.86046	0.276739
			3.9351	5.05279
			3.41051	4.98702
			3.59125	0.571378
			4.21031	2.40596
			2.83109	2.62801
			4.73053	3.5757
			3.77095	2.82325
			3.31072	3.06016
			3.86711	2.84429
			4.14237	2.87656
			3.45984	3.45535
			4.81478	3.72332
			3.91066	0.424917
			2.46741	1.71442
			3.52857	2.75542
			3.2613	4.63308
			0.66383	3.62238
			0.335047	0.806218
			0.607233	0.892312
			3.99022	1.60284
			3.78416	1.69376
			0.462507	3.7369
			1.24438	4.09517
			2.09529	4.35246
			2.57806	0.670909
			1.0079	3.46682
			1.0751	1.75183
			3.10314	4.0885
			2.3664	3.68113
			2.12141	2.94736
			3.2167	2.15094
			3.08917	1.78864
			3.10891	4.7175
			3.02373	1.70898
			2.76575	0.709219
			1.85989	0.229539
			2.58161	2.58011
			3.1824	0.971408
			3.86431	0.142001
			2.97492	6.02138
			2.31144	3.98964
			3.89761	5.41001
			1.02014	0.661211
			1.5028	1.33093
			2.18657	0.942644
			3.16457	0.485026
			3.02278	0.44114
			3.73033	1.0988
			2.76575	1.13646
			0.756849	0.965641
			1.49534	0.251829
			5.08109	0.566556
			4.40416	0.397407
			4.00508	3.33131
			3.24254	2.09706
			3.80754	1.34077
			0.796662	4.61705
			1.36466	3.26958
			2.30564	4.86576
			3.672	3.51861
			0.898692	4.09756
			1.12851	1.1339
			2.30536	1.02992
			1.57187	4.53748
			4.00462	3.85316
			2.39559	1.94138
			1.61477	4.34823
			0.294372	2.4781
			3.47032	4.37543
			2.58835	3.14511
			2.91217	2.77729
			3.52781	1.39818
			3.39693	1.97957
			4.54591	1.46324
			3.16083	0.456648
			4.18066	1.37907
			2.60911	0.369344
			4.32931	0.958311
			3.11744	2.05815
			2.81462	2.72939
			0.502128	0.698997
			3.43352	4.68777
			0.776869	0.216419
			0.567593	3.81805
			2.81409	3.95772
			3.38097	3.49305
			2.78245	1.23335
			3.86796	1.286
			1.74904	3.04825
			0.555977	1.19182
			1.54631	2.57862
			4.39534	0.876448
			3.70289	1.95021
			3.29374	4.85398
			4.60709	5.05628
			1.29575	1.45613
			0.197591	0.679104
			1.7173	4.86518
			1.89841	3.741
			0.676666	4.6655
			0.758696	3.92329
			3.22562	3.95751
			0.955158	1.70014
			0.622008	4.93567
			2.55215	3.07956
			0.277526	0.826951
			3.01799	5.11005
			1.67917	4.62382
			0.716416	2.85177
			1.09911	0.604985
			0.522661	4.16397
			3.92264	1.63974
			0.935028	3.85323
			1.04067	1.80447
			3.70741	1.51808
			2.548	0.487065
			0.28466	3.88023
			0.890916	3.56261
			3.54632	4.33885
			0.350404	2.09323
			1.58858	2.13574
			2.99886	3.846
			0.499901	3.64011
			3.29875	1.09669
			0.581977	1.13918
			1.80662	3.16211
			0.945943	1.61666
			1.42355	3.56257
			4.32984	2.70594
			0.236723	4.51064
			2.94256	0.699241
			1.4201	2.39063
			1.47823	2.56412
			2.48906	0.897486
			3.69168	1.43294
			3.92427	4.42622
			3.2263	4.65641
			2.27376	3.97185
			0.324801	3.70593
			1.66502	0.194844
			2.65267	3.9949
			2.66183	2.34112
			1.14371	4.55102
			3.25404	0.871825
			4.19209	0.154538
			2.56601	1.69542
			1.00561	4.24995
			0.603702	3.50261
			0.40353	3.38488
			2.12932	1.71416
			0.640368	4.02341
			2.64934	0.680277
			3.68648	0.887302
			1.90233	0.138006
			4.42999	0.14714
			3.20607	0.409024
			4.22659	0.135678
			3.15006	0.175235
			3.34337	3.58971
			4.42184	3.59357
			3.26523	3.93227
			0.731052	1.01179
			1.77105	3.37406
			3.85758	0.429652
			1.97619	1.75472
			2.56913	4.15285
			2.31581	0.885083
			3.68326	4.30817
			0.984858	4.10748
			1.1322	1.57047
			1.16418	4.83702
			2.09124	3.28501
			1.85944	2.98756
			0.609655	3.23834
			0.427224	3.74644
			3.8737	3.652
			4.19027	2.55496
			1.00028	1.85388
			3.18543	4.49253
			0.95517	3.49869
			0.601169	4.48596
			1.56992	4.48342
			3.50924	2.88695
			1.57148	2.6109
			4.05389	0.901119
			2.77474	1.88048
			4.54538	2.51067
			0.147714	3.4957
			1.50419	3.80218
			0.521611	0.52031
			1.13893	1.31208
			0.903806	0.53191
			3.20391	3.26895
			3.50042	4.11519
			2.80423	4.24753
			1.68402	2.52423
			4.17132	3.24764
			3.73972	1.76129
			2.27117	3.81952
			1.9255	2.89011
			0.361373	4.5509
			1.76145	1.84925
			0.519721	2.12015
			2.83371	2.04588
			4.67374	4.62568
			3.73039	2.07168
			4.25269	2.56079
			1.1388	3.46442
			1.20495	3.46249
			0.438388	1.83575
			3.88939	1.07933
			1.29687	0.174329
			0.390103	4.11156
			0.729536	3.28866
			3.96081	3.50029
			3.41062	4.92221
			4.1857	3.83333
			3.80425	4.58514
			4.36566	4.7146
			4.2415	4.96068
[truncated: 471 more rows]
