# Supplementary material for: Huntingtin recruits KIF1A to transport synaptic vesicle precursors along the mouse axon to support synaptic transmission and motor skill learning
Source: eLife. 2023 Jul 11;12:e81011. doi: 10.7554/eLife.81011 (PMC10365837; doi:10.7554/eLife.81011)
Supplement: Figure 6—figure supplement 2—source data 2. [file elife-81011-fig6-figsupp2-data2.xlsx]

## Sheet: Figure S7b-Retrograde velocity
	Wild-type/sh-Scr	Wild-type/sh-KIF1A	HTT-SD/sh-Scr	HTT-SD/sh-KIF1A
	-0.535	-0.267	-0.472	-0.894
	-1.918	-0.924	-0.451	-0.732
	-1.69	-1.158	-1.004	-0.773
	-1.124	-0.446	-0.446	-1.627
	-0.528	-0.268	-0.803	-0.535
	-0.439	-0.558	-1.627	-1.198
	-1.338	-1.113	-1.472	-0.608
	-0.515	-0.602	-0.535	-1.4
	-0.709	-1.026	-0.331	-0.695
	-1.664	-1.824	-0.803	-0.635
	-0.852	-2.335	-1.576	-1.217
	-0.892	-1.146	-1.537	-0.123
	-0.486	-0.127	-0.326	-0.281
	-0.52	-0.182	-2.091	-0.407
	-0.386	-2.004	-1.602	-3.801
	-2.892	-0.754	-2.556	-0.4
	-2.305	-1.279	-0.92	-0.613
	-1.231	-0.991	-3.901	-2.263
	-1.901	-0.891	-1.663	-2.783
	-2.406	-0.286	-1.378	-0.462
	-0.72	-1.188	-2.147	-1.244
	-1.175	-0.506	-1.225	-1.93
	-1.642	-0.803	-2.219	-0.251
	-2.552	-1.681	-1.716	-0.599
	-1.289	-0.852	-3.176	-1.873
	-1.485	-0.268	-0.745	-0.466
	-0.801	-0.596	-0.413	-2.533
	-0.961	-0.334	-0.228	-2.676
	-1.379	-0.411	-0.647	-1.361
	-3.167	-0.646	-3.783	-0.956
	-0.808	-0.899	-3.745	-2.265
	-1.658	-0.509	-0.586	-0.401
	-1.237	-0.297	-0.828	-0.187
	-2.226	-0.668	-1.339	-1.065
	-0.258	-0.574	-1.339	-2.941
	-0.445	-2.175	-0.913	-1.963
	-0.341	-0.189	-1.741	-0.167
	-1.117	-0.535	-0.71	-0.125
	-0.51	-3.094	-2.897	-0.803
	-3.801	-2.921	-1.616	-1.244
	-1.681	-3.674	-0.278	-3.954
	-1.915	-0.703	-2.089	-0.191
	-0.749	-0.74	-2.692	-2.555
	-0.544	-0.882	-1.654	-0.131
	-0.888	-0.167	-1.366	-0.525
	-0.687	-0.668	-2.789	-1.204
	-1.288	-2.754	-2.028	-1.477
	-1.622	-1.752	-3.639	-1.171
	-1.028	-0.951	-0.687	-2.239
	-1.373	-3.777	-0.669	-0.949
	-0.961	-2.268	-0.836	-0.453
	-0.609	-2.286	-0.994	-0.946
	-1.155	-3.683	-1.653	-0.804
	-2.062	-0.667	-2.676	-0.852
	-2.094	-2.269	-0.879	-0.196
	-2.16	-0.728	-1.824	-0.294
	-1.069	-0.272	-0.335	-0.701
	-2.556	-1.713	-2.835	-2.176
	-1.336	-1.079	-0.558	-3.181
	-0.668	-2.456	-1.264	-1.116
	-0.668	-0.782	-1.393	-2.323
	-1.113	-0.857	-0.268	-2.543
	-1.737	-1.338	-1.188	-2.831
	-1.29	-1.722	-0.125	-0.63
	-0.579	-1.032	-2.799	-0.335
	-1.236	-0.574	-2.627	-3.268
	-0.65	-1.364	-0.94	-1.338
	-1.252	-2.385	-1.227	-0.877
	-1.66	-0.688	-2.574	-0.535
	-1.539	-1.807	-0.991	-0.544
	-0.505	-1.242	-1.654	-0.472
	-0.149	-1.836	-0.692	-1.013
	-0.371	-3.557	-1.864	-1.243
	-0.406	-2.417	-1.203	-0.792
	-1.218	-2.142	-1.339	-0.724
	-0.569	-0.926	-0.551	-4.097
	-1.085	-1.237	-0.708	-1.535
	-0.269	-0.195	-1.817	-1.692
	-1.895	-0.475	-0.48	-0.191
	-1.023	-0.535	-0.748	-0.789
	-0.988	-0.178	-0.614	-0.803
	-1.628	-0.634	-2.278	-1.082
	-0.892	-3.248	-1.571	-2.193
	-0.362	-1.337	-0.669	-0.334
	-0.423	-0.848	-0.179	-2.642
	-0.304	-1.362	-2.083	-2.289
	-0.585	-0.281	-2.317	-0.503
	-0.191	-1.118	-0.159	-0.459
	-1.871	-1.15	-2.961	-0.527
	-1.086	-0.573	-0.179	-0.182
	-2.474	-0.802	-2.008	-1.201
	-0.729	-1.253	-3.746	-1.949
	-1.458	-3.495	-3.248	-3.124
	-2.39	-0.567	-1.731	-0.927
	-0.215	-1.227	-2.41	-1.953
	-1.305	-0.415	-2.329	-2.181
	-1.782	-0.618	-2.02	-2.725
	-0.197	-1.295	-0.358	-1.385
	-0.149	-1.448	-1.319	-1.1
	-1.4	-1.837	-0.245	-0.892
	-1.21	-2.13	-2.269	-0.58
	-1.069	-0.693	-3.075	-0.739
	-1.054	-2.736	-2.678	-0.51
	-1.805	-0.881	-0.259	-1.422
	-1.409	-0.181	-0.699	-0.167
	-0.464	-0.182	-0.423	-3.135
	-1.094	-1.002	-3.246	-1.992
	-0.936	-0.237	-0.339	-2.503
	-1.809	-0.859	-2.003	-2.281
	-0.209	-1.461	-0.935	-0.786
	-2.403	-0.314	-1.448	-2.226
	-0.381	-0.551	-1.091	-1.125
	-0.744	-2.429	-1.056	-0.927
	-2.67	-2.214	-0.802	-0.243
	-1.797	-2.394	-1.146	-0.501
	-1.843	-2.004	-1.208	-1.62
	-0.419	-0.434	-0.592	-0.134
	-1.043	-2.889	-0.838	-0.134
	-1.178	-0.823	-0.42	-0.208
	-1.027	-0.669	-1.009	-0.153
	-1.399	-2.204	-0.892	-0.618
	-2.78	-0.752	-2.541	-0.754
	-2.612	-0.317	-2.093	-0.753
	-1.096	-0.478	-1.206	-2.018
	-2.725	-0.494	-0.973	-0.438
	-2.701	-2.211	-0.592	-0.865
	-0.223	-0.909	-0.944	-1.142
	-1.19	-2.091	-1.25	-0.282
	-0.412	-0.205	-0.956	-0.691
	-0.365	-1.803	-1.421	-1.863
	-1.902	-0.668	-3.024	-0.727
	-0.463	-1.242	-3.348	-1.813
	-3.297	-0.668	-0.871	-0.852
	-2.163	-0.835	-0.7	-0.614
	-1.087	-1.669	-2.09	-0.679
	-1.133	-0.811	-0.206	-0.446
	-0.908	-1.072	-0.511	-0.929
	-0.172	-2.255	-0.648	-2.231
	-0.966	-0.573	-0.206	-0.335
	-1.539	-0.577	-0.474	-1.485
	-0.763	-0.472	-0.165	-1.913
	-0.664	-0.401	-1.143	-2.675
	-1.396	-0.598	-0.543	-0.47
	-0.335	-0.416	-0.315	-1.213
	-0.584	-0.49	-0.436	-0.334
	-1.905	-0.891	-1.141	-3.143
	-0.752	-0.475	-0.618	-2.407
	-0.725	-1.767	-0.167	-1.064
	-0.807	-2.408	-3.181	-2.45
	-0.883	-2.972	-0.489	-1.765
	-0.944	-3.771	-1.172	-1.009
	-1.086	-0.891	-2.977	-2.064
	-0.134	-3.717	-1.361	-0.831
	-0.77	-0.35	-1.235	-0.418
	-1.161	-0.647	-1.923	-0.226
	-1.227	-1.462	-1.222	-1.898
	-0.372	-1.069	-1.418	-1.107
	-2.355	-0.709	-0.58	-1.77
	-0.107	-0.2	-0.714	-1.582
	-0.29	-2.53	-1.28	-1.023
	-1.089	-0.206	-1.338	-0.375
	-2.123	-0.377	-0.479	-0.73
	-0.415	-0.669	-0.446	-0.503
	-0.591	-2.197	-3.443	-2.097
	-0.179	-3.777	-3.124	-1.68
	-0.743	-0.446	-0.248	-1.897
	-1.088	-0.334	-1.843	-1.889
	-0.191	-1.889	-2.946	-0.86
	-1.514	-2.469	-2.995	-1.184
	-1.309	-0.1	-3.18	-1.034
	-1.781	-2.408	-0.43	-2.038
	-0.107	-0.892	-0.893	-3.034
	-2.127	-3.5	-2.142	-1.01
	-1.715	-1.325	-0.925	-1.753
	-0.31	-0.979	-1.298	-1.037
	-1.918	-1.932	-0.452	-1.72
	-3.315	-0.836	-0.721	-1.989
	-0.309	-0.606	-3.281	-0.468
	-0.644	-0.345	-0.445	-1.338
	-3.706	-0.955	-0.184	-0.524
	-4.011	-0.764	-0.334	-3.902
	-3.324	-1.951	-1.88	-2.071
	-0.501	-0.502	-3.505	-0.243
	-2.181	-0.339	-0.146	-0.669
	-2.078	-0.957	-3.389	-0.401
	-1.707	-0.103	-2.208	-0.731
	-0.535	-0.804	-1.245	-1.023
	-0.529	-0.244	-0.314	-2.242
	-1.525	-1.359	-0.298	-0.281
	-3.744	-1.757	-1.551	-1.72
	-0.334	-1.955	-0.285	-0.669
	-1.014	-1.675	-2.097	-0.157
	-0.89	-0.261	-0.769	-3.269
	-2.126	-0.867	-1.232	-0.551
	-0.442	-0.887	-1.039	-1.031
	-0.267	-0.503	-2.834	-1.158
	-0.234	-1.856	-0.524	-1.737
	-2.113	-1.742	-2.009	-1.414
	-0.513	-0.327	-2.126	-2.482
	-0.277	-3.51	-2.158	-0.884
	-0.727	-2.681	-2.26	-0.66
	-0.347	-1.987	-0.765	-2.809
	-0.285	-0.72	-0.28	-1.204
	-0.212	-1.039	-2.017	-0.352
	-2.541	-0.249	-2.381	-3.321
	-3.665	-2.319	-1.906	-2.361
	-2.046	-0.327	-1.597	-1.405
	-0.201	-0.802	-1.404	-0.688
	-0.471	-2.713	-0.735	-2.007
	-2.025	-1.743	-0.874	-1.09
	-0.501	-0.191	-1.514	-0.975
	-0.801	-0.654	-0.711	-1.958
	-0.223	-1.503	-2.119	-0.134
	-1.691	-3.796	-0.105	-1.147
	-0.458	-0.706	-0.974	-0.633
	-2.443	-3.266	-1.359	-0.63
	-0.324	-1.56	-1.916	-0.167
	-0.992	-1.591	-2.348	-1.453
	-0.841	-1.353	-0.67	-2.572
	-1.335	-1.062	-3.782	-0.446
	-1.821	-0.214	-3.183	-2.068
	-0.111	-0.205	-1.311	-0.123
	-3.464	-0.191	-0.925	-0.893
	-0.159	-0.768	-0.461	-1.412
	-0.501	-0.853	-1.108	-0.167
	-1.06	-0.712	-2.885	-0.489
	-3.111	-2.161	-0.86	-1.339
	-0.187	-0.77	-0.32	-0.957
	-0.349	-0.844	-0.91	-0.402
	-0.349	-2.859	-2.241	-1.79
	-1.016	-0.385	-0.919	-2.743
	-2.703	-0.512	-2.458	-1.6
	-1.517	-0.435	-1.021	-0.414
	-0.355	-0.479	-0.288	-1.883
	-2.907	-0.661	-1.025	-0.512
	-1.104	-2.015	-0.286	-0.741
	-0.627	-0.907	-0.449	-2.089
	-2.718	-0.297	-0.822	-1.929
	-1.094	-0.852	-1.023	-0.128
	-0.119	-1.032	-3.073	-0.281
	-0.477	-0.374	-0.206	-2.288
	-3.563	-0.668	-1.159	-2.848
	-3.451	-0.267	-0.166	-2.926
	-0.601	-1.151	-1.498	-1.714
	-1.579	-0.445	-2.707	-1.977
	-0.436	-0.742	-0.227	-0.227
	-1.062	-0.581	-0.268	-1.812
	-0.445	-0.141	-3.372	-2.522
	-3.88	-2.71	-0.228	-1.507
	-0.463	-0.892	-3.058	-1.362
	-3.05	-0.764	-0.915	-0.17
	-1.72	-0.501	-0.446	-0.268
	-1.095	-0.572	-0.526	-0.891
	-0.837	-2.01	-2.373	-0.869
	-2.051	-0.232	-1.416	-2.53
	-0.659	-0.353	-3.027	-0.164
	-1.296	-0.434	-1.389	-0.687
	-2.242	-0.42	-0.112	-0.154
	-2.169	-0.201	-2.507	-0.953
	-2.254	-0.756	-0.691	-0.812
	-1.234	-0.591	-2.419	-0.418
	-0.94	-0.447	-0.781	-1.454
	-2.195	-1.876	-0.969	-0.557
	-1.922	-2.886	-1.925	-0.366
	-2.474	-0.604	-0.253	-0.212
	-3.082	-1.016	-0.731	-0.534
	-0.659	-0.781	-0.585	-1.435
	-1.025	-1.601	-1.323	-1.607
	-1.072	-2.246	-0.104	-1.059
	-0.12	-0.143	-3.087	-1.917
	-1.131	-3.602	-0.275	-0.711
	-1.258	-2.473	-3.658	-2.745
	-0.332	-3.475	-1.723	-1.958
	-2.564	-3.256	-1.09	-0.491
	-3.565	-3.267	-2.891	-0.893
	-2.592	-0.415	-2.997	-1.868
	-1.079	-1.337	-1.147	-0.379
	-1.36	-0.339	-0.208	-1.315
	-0.607	-1.403	-3.139	-1.142
	-0.494	-0.509	-0.51	-0.943
	-1.581	-1.337	-1.269	-0.441
	-1.608	-2.201	-1.536	-1.875
	-3.07	-0.872	-0.474	-2.116
	-0.413	-1.253	-1.094	-2.411
	-0.709	-1.239	-2.057	-0.325
	-1.539	-1.178	-0.292	-0.558
	-1.184	-1.671	-1.127	-3.022
	-0.945	-0.832	-0.752	-1.998
	-0.498	-0.453	-0.283	-1.531
	-0.166	-1.375	-0.121	-1.838
	-1.269	-3.533	-0.834	-1.218
	-0.408	-3.365	-1.064	-0.859
	-0.415	-3.647	-0.241	-1.416
	-0.482	-3.137	-1.595	-1.882
	-1.708	-0.764	-2.46	-2.009
	-0.751	-0.702	-2.338	-0.625
	-1.022	-1.337	-1.336	-0.137
	-1.017	-0.54	-0.223	-3.039
	-1.006	-0.549	-0.445	-0.792
	-1.571	-1.337	-3.458	-0.457
	-1.036	-1.269	-1.628	-3.746
	-1.437	-0.183	-0.445	-0.223
	-1.596	-0.515	-1.916	-1.434
	-0.138	-0.459	-0.649	-2.764
	-1.724	-0.446	-0.238	-0.141
	-1.998	-2.409	-0.191	-1.293
	-1.998	-2.441	-0.937	-0.63
	-0.679	-3.74	-1.217	-2.645
	-0.987	-1.213	-1.115	-0.349
	-0.706	-0.844	-1.133	-0.706
	-1.041	-2.482	-0.571	-2.935
	-1.091	-0.199	-1.133	-1.898
	-0.432	-0.121	-1.711	-2.646
	-2.148	-1.078	-0.744	-1.929
	-0.866	-1.114	-2.967	-1.28
	-2.181	-0.58	-0.92	-0.514
	-1.16	-1.334	-1.837	-1.171
	-1.136	-3.474	-0.978	-0.277
	-0.248	-0.292	-0.101	-1.648
	-0.605	-0.545	-0.326	-1.886
	-0.386	-0.314	-0.859	-1.39
	-0.884	-1.833	-2.221	-1.095
	-1.711	-1.81	-0.624	-2.479
	-0.894	-1.767	-2.572	-1.372
	-1.272	-1.525	-1.581	-1.882
	-2.209	-0.163	-1.915	-0.227
	-1.587	-0.191	-3.314	-0.561
	-1.41	-0.867	-3.588	-1.524
	-1.069	-0.972	-0.334	-1.862
	-1.728	-1.929	-0.822	-1.848
	-0.389	-0.501	-0.148	-1.013
	-0.646	-0.468	-4.252	-0.916
	-1.414	-0.129	-2.386	-0.517
	-3.947	-0.551	-0.776	-0.179
	-0.856	-1.913	-0.401	-0.339
	-0.582	-0.955	-0.52	-0.642
	-3.226	-0.776	-0.31	-2.127
	-0.228	-0.243	-1.927	-2.168
	-0.464	-1.051	-0.25	-2.597
	-1.191	-0.362	-0.675	-0.943
	-1.513	-2.507	-0.688	-0.762
	-0.583	-0.345	-0.468	-2.678
	-0.725	-0.705	-0.362	-0.317
	-0.446	-0.533	-2.332	-2.005
	-3.423	-0.121	-4.171	-2.28
	-0.191	-3.096	-2.065	-0.429
	-0.545	-2.356	-2.417	-2.665
	-3.65	-1.375	-4.009	-0.176
	-1.417	-0.406	-1.114	-0.896
	-0.765	-0.118	-1.893	-0.446
	-1.055	-3.021	-1.701	-1.073
	-0.524	-0.676	-3.081	-1.461
	-0.39	-0.253	-0.26	-1.323
	-1.115	-0.538	-0.792	-0.995
	-0.283	-0.257	-0.793	-3.564
	-0.172	-0.766	-2.547	-1.078
	-1.077	-3.578	-0.476	-0.777
	-0.689	-3.066	-3.076	-0.558
	-1.181	-2.636	-3.433	-1.432
	-0.521	-1.782	-2.355	-0.212
	-0.109	-0.334	-0.669	-0.531
	-1.535	-2.338	-1.012	-0.634
	-1.132	-0.492	-0.524	-0.116
	-2.254	-0.72	-2.856	-2.677
	-0.713	-0.678	-0.96	-0.402
	-1.446	-0.874	-2.605	-0.263
	-0.838	-1.368	-1.314	-0.525
	-0.494	-2.98	-0.122	-0.464
	-0.934	-1.204	-0.412	-0.3
	-0.308	-0.979	-0.967	-3.158
	-1.216	-3.618	-2.169	-1.335
	-1.311	-0.149	-0.544	-0.259
	-1.001	-0.669	-0.418	-1.338
	-0.915	-0.404	-1.587	-0.282
	-0.526	-1.673	-0.574	-2.051
	-0.63	-2.126	-2.43	-0.257
	-0.373	-0.949	-1.029	-0.985
	-0.42	-0.88	-0.977	-1.216
	-0.994	-0.324	-1.053	-1.088
	-1.75	-3.221	-2.074	-2.118
	-1.15	-0.305	-0.893	-3.439
	-1.021	-1.07	-0.419	-4.013
	-1.814	-2.704	-0.564	-1.851
	-0.377	-1.07	-0.66	-4.175
	-1.045	-0.404	-2.212	-2.315
	-2.64	-0.471	-2.228	-3.68
	-1.431	-0.836	-2.697	-3.493
	-2.367	-2.177	-0.943	-0.535
	-0.785	-0.871	-2.995	-1.051
	-1.947	-0.891	-0.693	-1.058
	-2.005	-0.512	-0.868	-0.657
	-1.042	-0.79	-1.148	-1.929
	-1.776	-0.21	-1.038	-3.479
	-2.43	-1.343	-0.922	-2.755
	-2.827	-2.965	-2.233	-2.509
	-1.114	-1.772	-1.644	-3.643
	-0.588	-0.964	-0.382	-0.836
	-0.326	-0.953	-0.502	-0.852
	-0.711	-1.293	-1.07	-2.415
	-1.492	-0.924	-0.551	-3.622
	-0.334	-2.776	-0.426	-0.397
	-1.365	-0.839	-0.181	-2.757
	-0.499	-0.667	-0.947	-2.435
	-2.685	-0.501	-0.191	-2.946
	-1.018	-0.485	-0.134	-1.562
	-1.067	-2.117	-1.339	-0.551
	-0.356	-0.648	-2.475	-2.875
	-1.026	-0.816	-1.628	-3.3
	-0.447	-1.144	-0.301	-0.185
	-1.552	-1.869	-0.422	-2.065
	-1.726	-0.981	-0.101	-2.215
	-1.091	-3.177	-1.749	-1.972
	-0.234	-0.859	-0.86	-0.122
	-1.039	-0.782	-0.291	-2.732
	-0.669	-2.468	-0.545	-0.625
	-1.952	-0.891	-1.915	-0.502
	-0.279	-3.744	-0.78	-0.99
	-0.764	-1.519	-0.509	-1.23
	-0.375	-0.315	-0.186	-0.23
	-0.256	-2.167	-0.646	-2.678
	-0.834	-0.893	-0.381	-0.536
	-0.638	-1.948	-1.4	-1.278
	-0.865	-0.563	-0.421	-1.939
	-1.537	-3.044	-0.829	-0.185
	-2.026	-0.428	-1.145	-0.51
	-3.167	-0.429	-0.351	-1.991
	-3.7	-1.955	-0.522	-1.722
	-1.781	-2.007	-2.018	-0.109
	-2.934	-1.338	-0.647	-0.3
	-2.384	-1.178	-2.195	-1.92
	-3.118	-1.03	-1.697	-0.841
	-0.613	-1.16	-0.929	-2.607
	-1.368	-0.446	-1.002	-0.434
	-1.48	-0.972	-0.458	-2.693
	-0.971	-0.813	-0.972	-4.233
	-1.163	-0.621	-2.394	-2.35
	-1.055	-0.125	-0.379	-3.24
	-1.075	-1.365	-0.487	-1.85
	-0.783	-0.751	-2.101	-1.046
	-1.338	-0.941	-0.455	-1.064
	-1.135	-2.72	-3.172	-2.156
	-0.182	-0.573	-0.466	-1.721
	-0.461	-2.32	-1.095	-1.831
	-1.034	-2.236	-1.803	-2.25
	-0.993	-0.898	-1.721	-0.111
	-1.336	-1.753	-1.937	-2.469
	-1.336	-0.835	-1.71	-0.111
	-2.117	-0.52	-1.017	-1.338
	-1.438	-1.377	-1.725	-0.143
	-0.983	-1.309	-0.191	-0.253
	-1.788	-2.673	-2.459	-0.213
	-1.8	-2.63	-0.829	-2.673
	-2.392	-2.265	-0.711	-0.223
	-0.229	-0.178	-0.297	-4.238
	-1.416	-0.389	-1.19	-3.425
	-0.382	-0.59	-0.46	-0.578
	-0.612	-0.396	-0.87	-0.668
	-0.945	-0.699	-0.122	-3.389
	-2.757	-2.022	-0.122	-2.385
	-1.719	-1.13	-0.478	-1.448
	-3.007	-0.645	-1.276	-2.671
	-2.578	-0.762	-0.219	-1.002
	-1.118	-1.142	-2.151	-1.027
	-0.176	-1.03	-0.46	-1.336
	-1.368	-0.477	-1.263	-1.205
	-1.402	-2.255	-1.116	-0.837
	-0.223	-1.253	-0.335	-0.62
	-1.07	-1.468	-0.149	-1.851
	-2.676	-0.158	-1.818	-2.428
	-2.706	-2.121	-1.406	-0.63
	-2.699	-0.477	-0.579	-4.272
	-1.014	-0.697	-0.233	-3.44
	-1.986	-2.287	-0.837	-0.913
	-2.676	-2.375	-0.837	-0.462
	-1.205	-1.422	-2.068	-0.497
	-3.18	-1.172	-2.628	-0.67
	-2.766	-1.567	-1.431	-1.741
	-2.276	-2.261	-0.818	-0.897
	-1.152	-1.517	-0.307	-3.096
	-0.791	-1.246	-0.478	-0.215
	-1.024	-3.295	-0.312	-2.7
	-0.214	-0.788	-0.735	-1.659
	-0.573	-1.007	-0.653	-0.102
	-1.485	-3.41	-1.785	-1.243
	-2.317	-1.171	-0.26	-0.792
	-2.05	-1.182	-1.51	-0.355
	-0.904	-0.55	-1.736	-2.01
	-2	-0.223	-1.227	-0.114
	-0.95	-0.492	-2.282	-0.644
	-2.146	-0.669	-1.225	-3.163
	-2.155	-0.446	-0.388	-0.103
	-3.612	-1.362	-0.487	-0.54
	-1.822	-0.16	-2.933	-3.124
	-2.811	-0.876	-1.295	-2.243
	-0.894	-0.926	-0.524	-0.43
	-2.189	-1.609	-1.596	-0.372
	-0.825	-1.956	-3.594	-1.013
	-1.096	-0.946	-1.073	-0.861
	-1.955	-1.699	-0.936	-2.626
	-1.457	-1.135	-2.054	-0.767
	-1.181	-0.838	-1.358	-0.365
	-3.142	-1.407	-1.25	-0.313
	-0.187	-1.234	-2.022	-1.545
	-0.151	-1.58	-0.685	-1.075
	-1.139	-1.421	-3.376	-1.003
	-0.864	-1.315	-3.156	-0.886
	-0.419	-0.131	-2.297	-1.323
	-1.8	-0.282	-0.534	-0.627
	-0.67	-1.325	-0.791	-2.174
	-0.311	-0.303	-0.314	-0.772
	-0.818	-0.503	-1.688	-1.486
	-1.357	-0.579	-1.657	-3.746
	-0.941	-0.298	-1.168	-2.47
	-0.905	-1.183	-1.657	-1.382
	-0.543	-2.027	-4.033	-1.714
	-1.315	-0.432	-0.114	-2.851
	-1.915	-0.978	-0.223	-0.126
	-1.293	-1.448	-1.846	-3.493
	-1.098	-1.475	-0.329	-0.924
	-0.587	-2.423	-0.717	-2.251
	-1.507	-0.447	-1.217	-1.441
	-0.604	-1.253	-1.621	-1.274
	-1.057	-0.237	-0.743	-0.851
	-0.803	-0.501	-1.721	-2.158
	-1.77	-1.2	-0.162	-1.004
	-2.16	-1.904	-1.618	-0.298
		-1.341	-1.927	-0.433
		-1.535	-0.141	-0.824
		-0.86	-0.71	-0.315
		-1.081	-0.175	-1.339
		-1.002	-0.335	-3.191
		-1.006	-1.099	-0.191
		-0.783	-0.894	-0.562
		-0.17	-0.971	-1.593
		-2.265	-0.574	-0.333
		-0.949	-0.186	-0.478
		-1.338	-0.574	-0.661
		-2.356	-2.097	-0.532
		-2.985	-1.874	-0.724
		-3.345	-1.141	-3.665
		-0.973	-0.469	-2.767
		-2.88	-2.284	-0.427
		-2.322	-0.837	-0.35
		-0.482	-1.217	-1.114
		-2.133	-1.171	-2.114
		-2.023	-2.053	-0.414
		-0.543	-0.764	-0.511
		-0.835	-1.999	-1.248
		-1.192	-0.216	-0.875
		-1.877	-0.401	-4.013
		-0.111	-2.526	-0.174
		-0.621	-2.756	-0.315
		-1.5	-1.337	-0.287
		-0.862	-0.583	-0.22
		-0.128	-1.337	-1.536
		-0.251	-2.324	-0.708
		-1.705	-0.617	-0.751
		-1.413	-0.783	-1.603
		-0.547	-1.696	-1.67
		-1.261	-3.121	-0.907
		-0.285	-0.163	-0.273
		-1.465	-1.464	-0.574
		-1.464	-0.927	-0.714
		-1.337	-0.956	-3.761
		-1.094	-1.473	-0.176
		-0.604	-0.244	-2.569
		-3.46	-0.68	-0.259
		-0.107	-1.296	-2.103
		-2.422	-1.08	-0.93
		-0.831	-0.943	-3.295
		-0.668	-2.864	-2.966
		-0.778	-0.822	-0.975
		-2.338	-2.168	-1.243
		-2.004	-0.857	-1.171
		-2.217	-1.551	-0.617
		-1.767	-1.217	-1.004
		-1.504	-1.071	-1.113
		-0.804	-0.696	-1.984
		-0.883	-1.707	-1.433
		-0.67	-0.226	-1.168
		-1.376	-1.244	-0.191
		-0.214	-0.279	-2.008
		-2.054	-0.956	-0.164
		-0.744	-1.115	-0.893
		-1.358	-1.003	-0.554
		-0.494	-1.554	-1.808
		-0.278	-1.359	-0.821
		-1.419	-0.573	-1.012
		-1.133	-3.316	-1.661
		-0.719	-2.905	-0.584
		-0.546	-2.115	-0.765
		-0.759	-0.816	-0.488
		-0.501	-2.238	-0.191
		-2.045	-0.98	-1.009
		-0.237	-1.07	-0.213
		-0.347	-1.27	-0.893
		-1.718	-1.86	-2.173
		-1.395	-2.13	-0.736
		-3.461	-1.56	-1.56
		-0.406	-0.7	-3.294
		-1.854	-1.84	-0.808
		-3.385	-1.38	-2.009
		-2.611	-1.24	-1.999
		-0.446	-1.44	-0.579
		-0.239	-0.4	-1.021
		-0.446	-0.75	-0.447
		-0.804	-2.83	-0.624
		-0.435	-2.69	-3.906
		-2.009	-1.27	-1.612
		-0.761	-0.14	-1.169
		-1.085	-1.74	-1.866
		-0.852	-0.67	-0.309
		-0.762	-1.52	-1.505
		-0.249	-3.48	-1.094
		-0.191	-2.6	-0.462
		-1.451	-1.8	-2.088
		-2.011	-1.07	-1.071
		-0.131	-0.44	-0.67
		-3.357	-2.12	-0.548
		-2.323	-1.56	-0.861
		-1.58	-3.44	-0.937
		-1.671	-2.53	-0.418
		-1.495	-1.42	-3
		-0.891	-1.3	-2.481
		-0.808	-1.62	-1.944
		-0.447	-2.35	-3.49
		-2.227	-2.42	-0.992
		-0.223	-0.61	-0.141
		-0.824	-1.01	-2.172
		-1.038	-1.68	-1.193
		-0.886	-0.37	-1.009
		-1.488	-1.46	-2.963
		-1.94	-0.99	-4.188
		-0.502	-1.04	-0.636
		-0.982	-0.53	-3.412
		-2.327	-3.41	-0.278
		-1.935	-0.33	-1.944
		-0.744	-1.96	-0.328
		-1.871	-2.46	-0.737
		-1.203	-1.69	-3.125
		-0.167	-0.61	-1.738
		-1.248	-1.82	-2.739
		-0.483	-1.08	-3.075
		-1.154	-1.02	-2.473
		-0.245	-0.71	-0.272
		-1.056	-1.76	-0.643
		-0.968	-1.55	-1.431
		-1.881	-0.48	-0.504
		-1.466	-1.32	-2.295
		-0.352	-3.91	-1.883
		-0.57	-2.35	-1.332
		-1.123	-1.42	-1.019
		-1.636	-1.43	-1.84
		-1.82	-0.99	-0.858
		-1.209	-1.73	-0.513
		-0.881	-0.62	-0.345
		-0.829	-0.46	-1.858
		-2.069	-0.21	-0.756
		-1.046	-2.36	-1.529
		-0.771	-0.75	-2.136
		-1.378	-0.43	-1.945
		-0.668	-3.11	-0.767
		-0.429	-2.25	-0.643
		-0.323	-0.95	-1.561
		-1.096	-0.79	-0.127
		-0.32	-1.34	-3.729
		-2.522	-2.2	-2.485
		-0.481	-1.3	-1.703
		-0.798	-1.15	-1.279
		-1.473	-2.51	-1.312
		-0.87	-0.4	-3.223
		-0.991	-1	-1.487
		-0.601	-1.46	-3.662
		-0.369	-2.32	-0.603
		-0.114	-1.81	-3.542
		-3.378	-1.14	-1.537
		-3.249	-1.52	-1.196
		-1.699	-2.3	-0.752
		-3.457	-1.45	-0.134
		-1.278	-0.36	-1.553
		-0.112	-1.28	-2.369
		-1.191	-2.92	-0.248
		-0.336	-0.64	-1.723
		-1.19	-0.43	-0.495
		-0.422	-0.8	-1.086
		-2.699	-0.46	-0.365
		-1.47	-0.83	-2.88
		-1.336	-0.85	-0.668
		-1.593	-0.78	-1.307
		-0.433	-0.75	-2.37
		-1.747	-0.46	-2.692
		-0.699	-0.19	-0.167
		-1.536	-0.41	-0.211
		-1.451	-0.53	-1.419
		-2.004	-0.91	-0.268
		-1.646	-2.6	-3.593
		-0.617	-0.36	-2.625
		-2.779	-0.32	-2.299
		-1.845	-1	-3.291
		-0.912	-0.18	-1.08
		-0.391	-0.78	-1.488
		-0.437	-0.88	-1.33
		-2.072	-1.02	-0.433
		-1.086	-0.78	-0.39
		-0.57	-2.41	-1.446
			-0.7	-2.089
			-0.49	-0.526
			-1.56	-1.205
			-2.9	-0.609
			-0.36	-0.571
			-1.89	-2.184
			-1.96	-1.582
			-0.58	-0.446
			-1.58	-0.824
			-2.09	-3.204
			-1.45	-2.521
			-1.66	-2.911
			-1.34	-3.615
			-0.54	-0.744
			-0.56	-0.714
			-0.88	-0.757
			-0.95	-2.176
			-0.9	-0.255
			-1.75	-0.367
			-1.18	-0.893
			-2.22	-0.798
			-0.61	-2.025
			-0.21	-2.008
			-1.98	-3.974
			-0.93	-0.408
			-0.94	-2.128
			-1.94	-0.608
			-2.43	-0.669
			-0.84	-0.494
			-2.21	-1.552
			-1.27	-0.487
			-0.73	-2.19
			-0.51	-1.124
			-2.16	-0.401
			-0.72	-3.041
			-1.5	-3.592
			-1.08	-2.835
			-0.98	-3.347
			-1.43	-0.499
			-1.07	-0.606
			-0.34	-1.069
			-0.79	-0.149
			-1.39	-1.227
			-1.57	-1.874
			-0.98	-3.164
			-1.14	-0.127
			-1.94	-0.854
			-1.57	-0.226
			-2.41	-0.493
			-4.08	-1.577
			-1.19	-1.473
			-1.24	-0.685
			-1.3	-0.128
			-1.77	-1.727
			-1.38	-0.544
			-0.49	-1.004
			-1.1	-0.251
			-3.04	-1.912
			-0.62	-0.535
			-0.99	-2.39
			-1.4	-2.062
			-1.73	-0.815
			-2.57	-2.343
			-1.61	-0.669
			-0.99	-3.833
			-1.42	-2.876
			-1.68	-2.17
			-0.64	-1.607
			-0.14	-0.349
			-1.99	-1.514
			-0.88	-0.609
			-2.23	-0.373
			-1.88	-0.714
			-1.6	-0.365
			-1.65	-1.902
			-1.67	-2.047
			-0.73	-2.751
			-0.64	-0.583
			-1.43	-0.63
			-0.19	-1.397
			-0.87	-1.53
			-1.42	-1.171
			-1.67	-0.852
			-0.16	-2.033
			-1.77	-0.702
			-1.26	-0.223
			-0.34	-0.354
			-0.13	-0.201
			-0.84	-0.655
			-2.42	-0.284
			-2.03	-0.835
			-1.14	-0.969
			-0.8	-4.155
			-0.52	-0.689
			-1.61	-0.678
			-2	-1.114
			-1.24	-1.114
			-1.46	-0.835
			-1.57	-0.392
			-0.69	-2.487
			-0.76	-2.143
			-1.2	-2.185
			-1.18	-2.292
			-2.8	-2.976
			-0.9	-0.7
			-1.01	-1.635
			-0.48	-0.718
			-0.51	-0.974
			-1.49	-2.563
			-0.3	-1.448
			-1.15	-2.839
			-0.44	-1.645
			-0.87	-1.987
			-2.32	-1.806
			-0.71	-2.606
			-0.42	-1.83
			-0.95	-2.222
			-1.37	-0.91
			-1.02	-2.756
			-2.09	-0.67
			-1.02	-0.446
			-0.9	-1.768
			-2.27	-0.335
			-2.27	-1.454
			-1.68	-0.536
			-0.43	-0.7
			-1.51	-2.08
			-0.89	-1.615
			-0.82	-0.87
			-0.27	-1.58
			-2.86	-3.03
			-0.62	-2.1
			-1.3	-0.47
			-2.46	-0.49
			-0.79	-0.99
			-2.8	-2.98
			-2.66	-1.5
			-0.66	-1.19
			-0.13	-2.07
			-0.93	-1.94
			-1.15	-1.13
			-2.6	-0.59
			-2.51	-0.68
			-2.06	-0.43
			-0.74	-1.11
			-1.4	-1.53
			-0.42	-1.62
			-0.56	-0.19
			-0.57	-0.55
			-1.74	-1.37
			-0.53	-1.37
			-1.2	-0.35
			-0.84	-0.94
			-1.45	-1.08
			-1.88	-1.01
			-1.37	-2.72
			-0.86	-1.74
			-2.35	-0.28
			-0.92	-2.17
			-1.61	-0.31
			-2.18	-2.34
			-2.18	-0.42
			-0.33	-0.9
			-1.03	-0.51
			-0.67	-1.3
			-1.22	-1.57
			-1.62	-1.4
			-1.13	-2.56
			-1.37	-1.89
			-0.42	-1.2
			-0.63	-2.63
			-0.73	-2.59
			-0.43	-1.91
			-1.21	-1.63
			-1.23	-1.69
			-0.94	-1.08
			-1.98	-2.22
			-0.81	-0.59
			-1.9	-0.36
			-1.74	-2.27
			-3.57	-1.25
			-1.21	-1.28
			-0.75	-1.39
			-1.28	-0.79
			-1.08	-0.61
			-0.83	-1.73
			-2.51	-0.9
			-2.14	-0.68
			-1.09	-0.37
			-1.49	-0.15
			-0.76	-1.73
			-0.37	-1.72
			-1.91	-1.36
			-2.53	-0.59
			-1.09	-1.46
			-1.03	-0.9
			-2.17	-0.51
			-1.07	-0.38
			-0.76	-1.02
			-0.61	-1.29
			-0.57	-2.74
			-0.64	-2.86
			-0.77	-2.14
			-0.34	-1.92
			-0.41	-0.25
			-0.53	-1.54
			-1.5	-1
			-1.78	-0.44
			-0.85	-0.57
			-2.75	-0.75
			-0.81	-1.5
			-0.75	-0.69
			-1.13	-0.98
			-0.84	-1.33
			-1.64	-0.38
			-1.2	-1.81
			-0.96	-1.46
			-2.98	-1.58
			-2.33	-0.86
			-2.18	-1.38
			-0.94	-0.47
			-0.82	-0.96
			-0.89	-1.55
			-0.42	-3.68
			-0.83	-1.36
			-0.73	-0.16
			-0.62	-1.6
			-0.13	-1.1
			-0.39	-0.34
			-0.45	-3.79
			-1.28	-3.6
			-1.36	-0.58
			-0.22	-0.8
			-0.76	-1.14
			-1.06	-3.46
			-1.05	-2.08
			-0.73	-1.31
			-2.82	-1.25
			-0.47	-0.76
			-1.28	-0.79
			-1.95	-0.77
			-0.28	-0.66
			-3.04	-0.9
			-1.43	-3.09
			-1.91	-3.81
			-1.59	-1.09
			-2.29	-0.76
			-0.34	-2.5
			-0.38	-0.6
			-1.56	-1.34
			-1.08	-0.56
			-1.29	-1.69
			-1.24	-0.48
			-0.5	-1.24
			-1.31	-1.77
			-1.12	-0.68
			-1.41	-0.75
			-0.9	-3.56
			-2.61	-1.2
			-0.42	-2.22
			-2.1	-0.59
			-0.4	-3.17
			-1.42	-0.63
			-0.32	-2.36
			-1.5	-1.18
			-1.28	-0.15
			-2.3	-0.43
			-0.27	-1.66
			-2.98	-1.33
			-1.63	-1.78
			-1.01	-2.18
			-1.72	-1.77
			-0.21	-2.9
			-0.57	-2.04
			-2.52	-1.03
			-0.2	-2.1
			-3.64	-1.43
			-0.38	-0.35
			-0.87	-0.14
			-1.66	-0.97
			-0.81	-1.32
			-2.59	-0.94
			-0.36	-1.64
			-0.45	-2.33
			-0.74	-1.88
			-0.47	-2.57
			-2.01	-1.94
			-0.78	-3.22
			-0.57	-1.23
			-1.54	-1.13
			-1.94	-2.1
			-0.45	-0.58
			-0.77	-1.71
			-1.66	-1.46
			-2.83	-1.09
			-2.55	-0.75
			-0.19	-1.37
			-1.32	-0.91
			-1.22	-1.51
			-2.02	-0.78
			-1.63	-3.75
			-1.24	-2.41
			-1.34	-0.18
			-0.38	-0.76
			-0.9	-2.41
			-2.31	-0.68
			-0.73	-4.1
			-1.05	-2.5
			-0.25	-2
			-2.13	-2.56
			-1.01	-1.52
			-1.7	-1.64
			-0.35	-1.18
			-0.26	-0.95
			-0.54	-0.58
			-0.68	-1.19
			-1.64	-0.62
			-0.57	-1.47
			-1.25	-0.18
			-0.81	-0.86
			-1.5	-1.73
			-1.7	-0.79
			-2.5	-0.94
			-0.42	-1.34
			-0.44	-0.15
			-0.33	-2.59
			-1.49	-1.87
			-0.82	-0.46
			-3.01	-0.71
			-1.27	-1
			-1.79	-3.59
			-1.19	-0.56
			-1.92	-0.57
			-1.78	-3.37
			-2.03	-0.17
			-2.2	-0.75
			-3.52	-0.14
			-0.54	-0.45
			-1.76	-0.31
			-2.84	-0.9
			-0.64	-1.77
			-0.95	-1.14
			-2.5	-0.21
			-0.17	-0.49
			-1.45	-0.23
			-0.73	-1.28
			-2.46	-1.7
			-0.3	-1.39
			-1.35	-0.35
			-1.81	-1.1
			-2.1	-1.77
			-0.45	-0.83
			-1.1	-0.72
			-0.45	-1.32
			-0.17	-1.46
			-1.12	-1.24
			-0.43	-2.14
			-1.94	-0.47
			-2.71	-1.02
			-1.81	-1.8
			-0.87	-1.09
			-0.81	-1.59
			-1.3	-0.62
			-0.77	-0.78
			-0.5	-0.31
			-1.24	-0.9
			-0.23	-0.96
			-1.16	-0.42
			-1.32	-1.37
			-2.53	-0.64
			-0.46	-1.17
			-2.45	-0.75
			-1.46	-1.42
			-1.57	-0.97
			-0.66	-2.66
			-0.27	-1.08
			-1.84	-1.53
			-2.29	-1.21
			-2.45	-0.87
			-3.25	-0.63
			-2.04	-0.89
			-1.54	-2.35
			-2.42	-0.31
			-0.41	-1.14
			-1.41	-0.34
			-1.33	-0.73
			-1.03	-2.11
			-1.41	-0.38
			-0.75	-0.14
			-0.29	-1.46
			-1.1	-1.05
			-0.98	-2.65
			-2.43	-0.92
			-1.08	-1.45
			-1.49	-1.09
			-0.65	-1.04
			-3.09	-0.78
			-3.44	-0.79
			-0.51	-0.59
			-1.92	-0.83
			-1.36	-0.64
			-2.78	-1.43
			-1.12	-0.74
			-3.1	-0.71
			-0.51	-0.27
			-0.6	-1.76
			-1.48	-1.09
			-0.78	-0.21
			-0.56	-1.15
			-2.36	-0.64
			-2.51	-0.45
			-0.89	-2.24
			-1.02	-1.78
			-0.16	-1.94
			-1.49	-1.11
			-2	-1.15
			-0.44	-0.8
			-4	-1.52
			-1.72	-3.21
			-2.58	-1.75
			-0.67	-0.28
			-0.46	-0.89
			-1.43	-1.99
			-2.05	-2.69
			-0.43	-2.06
			-2.06	-0.72
			-0.62	-0.57
			-2.96	-1.49
			-2.47	-1.4
			-1.64	-1.63
			-0.86	-2.3
			-0.37	-1.62
			-0.87	-1.44
			-1.57	-1.34
			-2.22	-0.96
			-0.34	-2.4
			-0.83	-0.68
			-1.16	-1.58
			-3.23	-0.83
			-1.89	-2.22
			-1	-1.69
			-1.04	-0.31
			-1.16	-2.41
			-1.34	-0.6
			-2.74	-1.38
			-4.25	-1.3
			-1.48	-0.55
			-2.34	-1.07
			-1.64	-2.41
			-1.84	-2.46
			-1.68	-0.52
			-1.67	-3.02
			-0.36	-1.08
			-1.01	-0.14
			-1.52	-0.97
			-1.01	-0.44
			-0.4	-3.85
			-0.27	-0.62
			-1.97	-1.13
			-0.37	-0.51
			-1.02	-1.41
			-1.18	-0.6
			-0.6	-3.46
			-1.73	-3.59
			-0.98	-1.82
			-2.91	-1.07
			-1.24	-0.27
			-0.9	-1.32
			-1.3	-0.86
			-1.63	-0.69
			-1.17	-0.88
			-0.8	-0.28
			-1.5	-1.14
			-0.32	-3.64
			-0.39	-0.51
			-0.17	-3.99
			-1.9	-0.71
			-0.39	-0.61
			-0.78	-0.5
			-1.17	-0.72
			-0.44	-1.75
			-0.13	-0.51
			-1.39	-1.18
			-0.16	-0.72
			-1.74	-1.22
			-2.81	-2.06
			-0.76	-0.96
			-1.9	-2.31
			-0.23	-1.3
			-0.99	-0.63
			-0.27	-2.29
			-0.94	-0.95
			-0.25	-2.91
			-1.78	-0.59
			-1.79	-0.87
			-0.77	-0.95
			-0.13	-1.13
			-1.43	-0.31
			-0.59	-1.24
			-1.22	-0.45
			-2.16	-1.14
			-0.16	-2.96
			-2.07	-0.23
			-1.44	-0.75
			-0.24	-0.64
			-0.83	-0.24
			-0.69	-1.91
			-3.01	-1.07
			-2.44	-0.92
			-1.89	-0.16
			-2.31	-1.95
			-1.45	-2.8
			-0.76	-1.89
			-2.27	-0.21
			-1.15	-2.41
			-1.18	-1.8
			-0.9	-0.53
			-1.09	-0.53
			-1.43	-0.96
			-0.91	-0.75
			-1.95	-0.93
			-0.47	-0.82
			-0.25	-1.14
			-0.96	-0.55
			-2.6	-2.09
			-0.31	-0.89
			-0.34	-0.98
			-0.57	-0.39
			-2.32	-0.86
			-0.38	-0.84
			-0.6	-0.54
			-2.08	-0.2
			-1.69	-0.62
			-1.2	-0.91
			-0.9	-0.33
			-0.89	-0.55
			-1.13	-1.49
			-2.11	-1.26
			-1.01	-1.18
			-0.99	-1.25
			-3.09	-1.17
			-0.94	-2.32
			-1.68	-0.51
			-2.55	-1.22
			-2.53	-0.89
			-0.75	-1.01
			-0.58	-0.23
			-3.04	-1.14
			-0.93	-1.27
			-0.39	-1.45
			-1.48	-0.96
			-1.85	-1.67
			-2.04	-1.64
			-1.92	-2.13
			-1.01	-1.08
			-1.89	-2.06
			-1.47	-0.83
			-1.81	-0.76
			-1.14	-2.69
			-1.52	-0.15
			-2.3	-0.51
			-1.45	-1.29
			-0.36	-1.7
			-1.28	-1.4
			-2.92	-0.46
			-0.64	-1.84
			-0.43	-2.46
			-0.8	-0.63
			-0.46	-1.66
			-0.83	-1.91
			-0.85	-0.57
			-0.78	-3.56
			-0.75	-0.61
			-0.46	-1.64
			-0.19	-3.25
			-0.41	-2.4
			-0.53	-3.38
			-0.91	-1.91
			-2.6	-0.8
			-0.36	-0.98
			-0.32	-2.66
			-1	-0.88
			-0.18	-0.7
			-0.78	-0.46
			-0.88	-1.27
			-1.02	-0.87
			-0.78	-2.26
			-2.41	-0.84
			-0.7	-1.76
			-0.49	-1.09
			-1.56	-1.04
			-2.9	-1.2
			-0.36	-0.61
			-1.89	-0.65
			-1.96	-0.82
			-0.58	-1.31
			-1.58	-0.26
			-2.09	-1.1
			-1.45	-0.7
			-1.66	-1.56
			-1.34	-0.24
			-0.54	-0.82
			-0.56	-2.61
			-0.88	-1.1
			-0.95	-0.87
			-0.9	-1.8
			-1.75	-0.93
			-1.18	-0.95
			-2.22	-0.53
			-0.61	-2.12
			-0.21	-0.67
			-1.98	-0.88
			-0.93	-1.19
			-0.94	-1.96
			-1.94	-0.5
			-2.43	-0.32
			-0.84	-0.54
			-2.21	-1.19
			-1.27	-0.56
			-0.73	-1.67
			-0.51	-1.47
			-2.16	-2.42
			-0.72	-1.46
			-1.5	-0.47
			-1.08	-1.15
			-0.98	-1.37
			-1.43	-0.78
			-1.07	-1.12
			-0.34	-0.85
			-0.79	-0.53
			-1.39	-0.68
			-1.57	-1.01
			-0.98	-2.22
			-1.14	-0.8
			-1.94	-1.02
			-1.57	-0.68
			-2.41	-0.57
			-4.08	-1.69
			-1.19	-1.4
			-1.24	-3.68
			-1.3	-1.23
			-1.77	-1.77
			-1.38	-1.46
			-0.49	-0.66
			-1.1	-2.15
			-3.04	-1.98
			-0.62	-0.64
			-0.99	-0.65
			-1.4	-0.17
			-1.73	-1.46
			-2.57	-2.1
			-1.61	-2.62
			-0.99	-0.94
			-1.42	-0.66
			-1.68	-1.49
			-0.64	-1.84
			-0.14	-3.19
			-1.99
			-0.88
			-2.23
			-1.88
			-1.6
			-1.65
			-1.67
			-0.73
			-0.64
			-1.43
			-0.19
			-0.87
			-1.42
			-1.67
			-0.16
			-1.77
			-1.26
			-0.34
			-0.13
			-0.84
			-2.42
			-2.03
			-1.14
			-0.8
			-0.52
			-1.61
			-2
			-1.24
			-1.46
			-1.57
			-0.69
			-0.76
			-1.2
			-1.18
			-2.8
			-0.9
			-1.01
			-0.48
			-0.51
			-1.49
			-0.3
			-1.15
			-0.44
			-0.87
			-2.32
			-0.71
			-0.42
			-0.95
			-1.37
			-1.02
			-2.09
			-1.02
			-0.9
			-2.27
			-2.27
			-1.68
			-0.43
			-1.51
			-0.89
			-0.82
			-0.27
			-2.86
			-0.62
			-1.3
			-2.46
			-0.79
			-2.8
			-2.66
			-0.66
			-0.13
			-0.93
			-1.15
			-2.6
			-2.51
			-2.06
			-0.74
			-1.4
			-0.42
			-0.56
			-0.57
			-1.74
			-0.53
			-1.2
			-0.84
			-1.45
			-1.88
			-1.37
			-0.86
			-2.35
			-0.92
			-1.61
			-2.18
			-2.18
			-0.33
			-1.03
			-0.67
			-1.22
			-1.62
			-1.13
			-1.37
			-0.42
			-0.63
			-0.73
			-0.43
			-1.21
			-1.23
			-0.94
			-1.98
			-0.81
			-1.9
			-1.74
			-3.57
			-1.21
			-0.75
			-1.28
			-1.08
			-0.83
			-2.51
			-2.14
			-1.09
			-1.49
			-0.76
			-0.37
			-1.91
			-2.53
			-1.09
			-1.03
			-2.17
			-1.07
			-0.76
			-0.61
			-0.57
			-0.64
			-0.77
			-0.34
			-0.41
			-0.53
			-1.5
			-1.78
			-0.85
			-2.75
			-0.81
			-0.75
			-1.13
			-0.84
			-1.64
			-1.2
			-0.96
			-2.98
			-2.33
			-2.18
			-0.94
			-0.82
			-0.89
			-0.42
			-0.83
			-0.73
			-0.62
			-0.13
			-0.39
			-0.45
			-1.28
			-1.36
			-0.22
			-0.76
			-1.06
			-1.05
			-0.73
			-2.82
			-0.47
			-1.28
			-1.95
			-0.28
			-3.04
			-1.43
			-1.91
			-1.59
			-2.29
			-0.34
			-0.38
			-1.56
			-1.08
			-1.29
			-1.24
			-0.5
			-1.31
			-1.12
			-1.41
			-0.9
			-2.61
			-0.42
			-2.1
			-0.4
			-1.42
			-0.32
			-1.5
			-1.28
			-2.3
			-0.27
			-2.98
			-1.63
			-1.01
			-1.72
			-0.21
			-0.57
			-2.52
			-0.2
			-3.64
			-0.38
			-0.87
			-1.66
			-0.81
			-2.59
			-0.36
			-0.45
			-0.74
			-0.47
			-2.01
			-0.78
			-0.57
			-1.54
			-1.94
			-0.45
			-0.77
			-1.66
			-2.83
			-2.55
			-0.19
			-1.32
			-1.22
			-2.02
			-1.63
			-1.24
			-1.34
			-0.38
			-0.9
			-2.31
			-0.73
			-1.05
			-0.25
			-2.13
			-1.01
			-1.7
			-0.35
			-0.26
			-0.54
			-0.68
			-1.64
			-0.57
			-1.25
			-0.81
			-1.5
			-1.7
			-2.5
			-0.42
			-0.44
			-0.33
			-1.49
			-0.82
			-3.01
			-1.27
			-1.79
			-1.19
			-1.92
			-1.78
			-2.03
			-2.2
			-3.52
			-0.54
			-1.76
			-2.84
			-0.64
			-0.95
			-2.5
			-0.17
			-1.45
			-0.73
			-2.46
			-0.3
			-1.35
			-1.81
			-2.1
			-0.45
			-1.1
			-0.45
			-0.17
			-1.12
			-0.43
			-1.94
			-2.71
			-1.81
			-0.87
			-0.81
			-1.3
			-0.77
			-0.5
			-1.24
			-0.23
			-1.16
			-1.32
			-2.53
			-0.46
			-2.45
			-1.46
			-1.57
			-0.66
			-0.27
			-1.84
			-2.29
			-2.45
			-3.25
			-2.04
			-1.54
			-2.42
			-0.41
			-1.41
			-1.33
			-1.03
			-1.41
			-0.75
			-0.29
			-1.1
			-0.98
			-2.43
			-1.08
			-1.49
			-0.65
			-3.09
			-3.44
			-0.51
			-1.92
			-1.36
			-2.78
			-1.12
			-3.1
			-0.51
			-0.6
			-1.48
			-0.78
			-0.56
			-2.36
			-2.51
			-0.89
			-1.02
			-0.16
			-1.49
			-2
			-0.44
			-4
			-1.72
			-2.58
			-0.67
			-0.46
			-1.43
			-2.05
			-0.43
			-2.06
			-0.62
			-2.96
			-2.47
			-1.64
			-0.86
			-0.37
			-0.87
			-1.57
			-2.22
			-0.34
			-0.83
			-1.16
			-3.23
			-1.89
			-1
			-1.04
			-1.16
			-1.34
			-2.74
			-4.25
			-1.48
			-2.34
			-1.64
			-1.84
			-1.68
			-1.67
			-0.36
			-1.01
			-1.52
			-1.01
			-0.4
			-0.27
			-1.97
			-0.37
			-1.02
			-1.18
			-0.6
			-1.73
			-0.98
			-2.91
			-1.24
			-0.9
			-1.3
			-1.63
			-1.17
			-0.8
			-1.5
			-0.32
			-0.39
			-0.17
			-1.9
			-0.39
			-0.78
			-1.17
			-0.44
			-0.13
			-1.39
			-0.16
			-1.74
			-2.81
			-0.76
			-1.9
			-0.23
			-0.99
			-0.27
			-0.94
			-0.25
			-1.78
			-1.79
			-0.77
			-0.13
			-1.43
			-0.59
			-1.22
			-2.16
			-0.16
			-2.07
			-1.44
			-0.24
			-0.83
			-0.69
			-3.01
			-2.44
			-1.89
			-2.31
			-1.45
			-0.76
			-2.27
			-1.15
			-1.18
			-0.9
			-1.09
			-1.43
			-0.91
			-1.95
			-0.47
			-0.25
			-0.96
			-2.6
			-0.31
			-0.34
			-0.57
			-2.32
			-0.38
			-0.6
