# Supplementary material for: Huntingtin recruits KIF1A to transport synaptic vesicle precursors along the mouse axon to support synaptic transmission and motor skill learning
Source: eLife. 2023 Jul 11;12:e81011. doi: 10.7554/eLife.81011 (PMC10365837; doi:10.7554/eLife.81011)
Supplement: Figure 6—figure supplement 2—source data 3. [file elife-81011-fig6-figsupp2-data3.xlsx]

## Sheet: Figure S7b-Linear Flow
	Wild-type/sh-Scr	Wild-type/sh-KIF1A	HTT-SD/sh-Scr	HTT-SD/sh-KIF1A
	11.65	3.02	8.93	9.08
	9.33	6.81	12.35	22.2
	26.17	4.05	9.82	16.7
	32.35	3.75	21.01	4.78
	24.26	1.21	13.15	31.55
	2.27	14.38	11.73	40.15
	5.13	21.58	19.08	15.38
	32.56	29.55	18.14	14.78
	11.89	4.5	32.35	33.72
	15.66	5.57	17.45	32.16
	16.86	15.79	19.34	28.64
	4.44	5.92	18.55	25.35
	9.38	10.46	36.96	11.43
	45.21	2.61	21.74	27.28
	21.95	3.47	16.07	30.23
	34.48	4.83	23.64	51.99
	23.05	7.42	24.91	32.81
	33.68	13.05	21.26	34.03
	12.57	23.55	43.61	60.16
	14.07	20.83	25.58	48.6
	7.43	15.31	25.21	10.15
	5.15	6.18	26.58	70.85
	8.26	22.09	15.02	28.93
	11.33	17.43	22.85	26.51
	10.99	18.98	11.57	32.23
	6.38	36.99	5.58	21.36
	12.49	23.02	14.61	24.81
	11.43	23.89	15.26	12.79
	36.04	10.38	14.17	33.24
	13.43	9.75	18.55	24.12
	18.48	17.6	10.89	28.01
	8.29	27.35	23.45	38.06
	5.61	13.24	19.41	21.4
	14.08	12.59	16.87	37.92
	7.98	49.08	23.5	50.01
	20.83	30.56	44.7	50.09
	5.71	24.11	23.37	42.14
	28.07	29.58	55.23	31.26
	21.76	13.13	9	11.89
	11.96	3.19	6.82	29.09
	12.53	12.46	17.35	28.09
	19.4	17.66	10.83	38.55
	16.1	27.55	26.37	16.64
	22.63	7.89	10.43	24.22
	19.82	5.68	18.85	16.95
	4.86	19.01	17.06	46.34
	13.57	12.95	28.99	21.89
	45.07	7.9	31.38	21.47
	51.45	11.46	17.39	27.9
	6.69	47.63	22.12	18.53
	13.52	17.76	7.67	38.92
	20.15	12.6	19.6	9.54
	21.71	18.75	16.56	38.56
	33.3	16.02	34.6	31.53
	20.19	17.63	16.38	22.92
	14.93	22.72	49.97	12.56
	8.34	14.62	5.98	53.44
	28.29	31.14	18.56	10.92
	19.43	37.3	14.87	54.22
	33.33	10	42.85	21.32
	17.96	32.62	20.12	24.79
	21.81	20.32	14.29	13.17
	15.81	21.61	27.84	14.68
	33	15.45	18.24	29.77
	16.15	24.65	25.96	19.3
	19.13	41.4	41.88	15.67
	28.17	19.54	36.63	29.02
	20.2	7.78	52.68	17.31
	24.71	22.11	26.16	24.73
	53.91	17.81	36.77	12.97
	22.36	23.22	52.91	47.95
	7.05	9.47	54.81	62.32
	20.17	19.37	60.86	67.63
	21.48	19.01	12.78	33.82
	12.31	13.17	42.85	26.53
		14.51	17.58	64.57
		22.65	31.07	29.59
		8.66	14.23	32.39
		10.46	26.81	29.36
		27.5	30.19	36.17
		41.43	57.93	37.79
		25.64	20.12	43.1
		15.79	14.83	18.12
		16.91	10.79	19.79
		23.53	8.85	24.74
		39.71	14.57	28.52
		26.94	22.74	24.26
		26.46	47.64	54.66
		29.14	23.99	17.67
		13.51	27.33	14.75
		22.2	18.5	34.16
		10.05	45.35	20.78
		23.57	59.08	53.76
		23.9	56.06	64.88
		27.57	30	24.25
		19.97	53.7	34.89
		9.06	46.29	41
		29	37.77	39.61
		16.55	15.58	15.06
		23.53	43.05	35.72
		17.76	15.34	69.01
		27.38	27.24	21.4
			8.56	24.33
			9.95	12.48
			6.5	11.8
			24.84	25.97
			6.18	45.61
			11.43	65.15
			13.52	13.48
			12.72	24.94
			12.35	13.29
			44.47	13.94
			14.84	11.03
			16.66	19.18
			1.8	19.56
			8.39	26.4
			5.61	14.55
			12.9	19.43
			13.02	12.35
			5.94	15.9
			16.38	17.09
			6.57	14.68
				20.07
				2.9
				49.69
				17.68
				11.1
				23.18
				33.81
				19.89
				14.82
				42.74
				17.4
				26.73
				7.63
				63.1
				21.46
				15.45
				22.43
				35.48
				16.27
				6.73
				9.63
				25.03
				2.48
				22.03
				4.18
				47.41
				14
				6.28
				14.81
				7.43
				17.77
				11.25
				17.39
				9.4
				17.77
				9.48
