# Supplementary material for: Huntingtin recruits KIF1A to transport synaptic vesicle precursors along the mouse axon to support synaptic transmission and motor skill learning
Source: eLife. 2023 Jul 11;12:e81011. doi: 10.7554/eLife.81011 (PMC10365837; doi:10.7554/eLife.81011)
Supplement: Figure 6—figure supplement 2—source data 4. [file elife-81011-fig6-figsupp2-data4.xlsx]

## Sheet: Figure S7b-Net Flux
	Wild-type/sh-Scr	Wild-type/sh-KIF1A	HTT-SD/sh-Scr	HTT-SD/sh-KIF1A
	-0.613522	-0.373638	8.93	3.59
	4.52178	6.81059	5.01	19.32
	9.04814	-0.500782	2.2	8.11
	12.9269	0.819249	10.06	-0.77
	-1.77038	1.21439	4.3	19.24
	-2.26543	0.279855	4.76	11.11
	-0.104826	18.3786	9.05	4.41
	15.7746	24.59	5.93	5.44
	4.36456	2.91426	14.67	4.39
	4.93349	2.86674	3.91	9.8
	-3.70241	7.31998	6.87	12.29
	-4.4411	3.04745	8.32	4.6
	0.360481	7.56947	9.47	4.72
	3.84304	2.6063	11.27	9.78
	6.26988	-0.42912	9.57	9.56
	19.4869	1.05663	10.31	19.64
	5.84809	5.73551	1.48	10.38
	7.77109	-6.3336	-8.67	17.3
	8.41038	12.1177	33.18	38.43
	-9.01923	4.55544	5.72	22.2
	4.35366	-0.602373	11.9	2.49
	5.1528	-1.9528	0.66	20.39
	4.19076	7.74549	3.36	4.81
	-11.3344	1.92092	10.51	4.54
	5.57903	1.82789	9.87	1.97
	0.0651893	-5.46005	-2.43	19.92
	0.127698	3.72742	5.19	1.67
	0.788618	-5.0694	-2.68	8.68
	-11.1853	0.202626	5.03	-1.73
	7.86457	-1.76605	13.08	5.09
	3.87698	-2.59856	7.91	16.48
	1.7388	17.1568	-2.78	12.11
	5.61197	4.64309	6.34	19.28
	-0.795199	1.38783	7.57	24.28
	-1.06028	12.4492	7.51	14.37
	-0.883843	18.0836	1.11	5.87
	5.70503	3.14224	23.37	15.18
	14.2514	9.22539	23.09	0.47
	-1.62329	2.12663	-0.47	3.09
	9.19524	0.0623438	-2.12	8.06
	12.5313	7.63269	6.16	21.82
	-5.68384	11.4431	2.42	6.13
	-5.96676	16.8721	10.22	13.71
	4.81997	4.06004	-3.95	8.67
	1.52	1.24135	15.25	8.42
	2.58	13.7595	7.37	11.41
	-7.36	6.08322	8.94	6.79
	23.93	0.154288	22.13	5.07
	-5.22	-6.7301	3.89	3.37
	1.61	-8.6306	4.95	27.43
	2.63	7.12503	-1.48	7.56
	3.07	-6.82737	4.39	15.45
	11.52	-3.97817	-6.85	11.87
	12.77	4.65691	15.53	7.56
	7.9	9.0701	3.67	4.87
	10.96	0.443521	19.48	15.33
	4.43	3.19661	1.34	0.63
	1.88	10.9172	1.1	12.02
	6.05	17.973	5.28	14.28
	6.49	-3.1584	20.52	4.5
	9.54	3.59545	5.76	-0.94
	2.2	-4.3113	2.14	9.17
	4.92	-1.24228	8.23	2.14
	2.82	2.86757	11.18	3.51
	3.88	11.5836	4.07	-1.72
	4.59	-10.138	18.76	5.27
	12.74	0.381391	20.09	12.9
	14.83	-2.45663	28.9	16.36
	9.15	13.34	1.75	0.75
	7.84	4.54	7.51	33.8
	2.96	-1.99	4.35	25.5
	-3.58	2.41	25.87	6.49
	9	2.43	41.65	-15.66
	5.16	8.22	3.37	22.38
	5.69	6.39	25.96	-1.53
		7.15	17.58	13.77
		8.34	16.77	18.94
		2.21	5.42	23.27
		4.53	10.89	22.38
		10.55	10.59	5.98
		10.55	29.99	-0.94
		19.66	36.71	7.15
		1.29	5.66	21.87
		7.63	-0.34	19.09
		1.36	4.11	-2.68
		25.81	-4.05	9.9
		19.43	2.85	5.06
		17.72	17.22	1.86
		15.2	21.88	16.87
		0.07	32.21	10.78
		5.66	9.89	24.73
		7.92	16.43	26.76
		7.67	10.4	6.95
		10.63	20.17	14.39
		10.14	24.41	18.25
		2.95	20.04	28.77
		4.91	13.89	3.02
		20.91	17.31	23.42
		-3.74	21.57	23.91
		12.89	18.57	6.13
		7.95	24.95	13.29
		7.68	6.8	5.74
		13.98	22.03	-6.35
			8.62	11.95
			18.02	30.19
			3.74	35.57
			9.95	2.02
			0.79	5.77
			22.08	5.48
			-2.49	9.1
			5.68	8.32
			13.52	4.61
			4.2	14.07
			8.3	11.83
			4.72	7.94
			14.84	10.19
			5.23	4.23
			1.8	12.43
			6.24	8.23
			1.46	12.46
			8.67	14.81
			8.76	-2.9
			1.54	37.49
			4.25	7.92
			4.88	5.63
				9.74
				29.91
				11.38
				12.18
				29.47
				9.49
				10.92
				7.63
				25.78
				16.19
				8.84
				10.37
				22.66
				13.61
				6.73
				6.92
				6.82
				2.48
				11.18
				4.18
				25.45
				10.94
				0.06
				6.85
				6.1
				10.78
				3.85
				0.18
				1.97
				15.09
				1.45
