# Supplementary material for: Huntingtin recruits KIF1A to transport synaptic vesicle precursors along the mouse axon to support synaptic transmission and motor skill learning
Source: eLife. 2023 Jul 11;12:e81011. doi: 10.7554/eLife.81011 (PMC10365837; doi:10.7554/eLife.81011)
Supplement: Figure 6—source data 1. [file elife-81011-fig6-data1.xlsx]

## Sheet: Figure 6b-Anterograde velocity
	Wild-type/sh-Scr	Wild-type/sh-KIF1A	HTT-SD/sh-Scr	HTT-SD/sh-KIF1A
	2.28159	1.86665	2.85488	3.42469
	3.16601	0.872507	0.966315	0.29148
	3.22849	0.114443	2.88774	0.702314
	4.29327	2.27247	1.84821	1.27712
	2.92401	2.27827	0.231289	2.64103
	2.99526	2.31182	0.128061	0.224351
	3.58389	1.59915	0.244564	3.55953
	2.8275	1.25108	1.14675	0.342926
	0.17149	1.26045	0.980744	0.369199
	0.215778	0.345803	4.32026	1.62393
	2.50815	0.806764	2.86548	0.706652
	1.32315	1.32631	0.656016	1.11925
	0.686859	0.974495	0.40686	3.4181
	1.66267	0.237632	2.9887	3.19073
	3.45475	1.42863	0.939721	3.45568
	4.06864	0.351179	0.674162	3.31771
	2.34178	0.165494	0.779959	1.25056
	2.43543	1.62701	0.25198	0.283928
	0.62723	2.82638	0.578136	0.630024
	3.04212	3.14009	2.86665	0.512206
	3.99881	3.19023	2.41278	0.519953
	1.15586	1.55132	0.716251	2.2195
	1.43354	3.25881	3.38085	1.16628
	2.36957	1.93766	3.52507	3.01355
	0.402207	3.94124	0.663482	0.813069
	2.41965	0.701449	4.51154	1.87915
	5.24827	2.78852	3.28469	1.18991
	1.75385	3.10337	0.673997	1.25908
	1.69066	3.50655	2.78416	3.22826
	0.464649	1.39716	1.71351	2.10867
	0.666713	1.52815	3.80055	0.935567
	1.19944	0.493111	3.68059	0.759513
	2.56706	0.96412	3.20673	0.935551
	1.45495	1.57316	2.6365	0.407494
	0.850645	0.159458	1.69407	0.426074
	1.31143	0.634963	0.253529	0.231538
	1.71463	1.06246	5.22574	0.263701
	2.68347	0.674851	4.38971	5.77021
	1.87555	0.226614	4.79098	1.98773
	3.32872	0.708166	0.490147	3.38517
	2.02042	0.728424	4.7379	1.19285
	4.77585	0.235359	0.550313	1.41883
	3.87163	0.360223	4.1141	4.69362
	4.53041	1.38177	3.68275	1.37192
	0.610783	0.165073	1.02068	1.45657
	0.280318	2.45201	3.42846	2.44106
	1.29594	1.9649	0.552995	1.4891
	0.717217	0.171664	1.85133	3.85901
	1.58655	0.302761	4.65468	0.586111
	2.8305	2.74151	3.62354	1.16887
	0.655557	1.65844	0.647403	1.14765
	1.50572	0.440568	5	0.847522
	0.953769	0.500001	2.50395	0.966091
	3.3866	0.215541	1.60821	0.703985
	0.123364	3.754	1.24862	0.379146
	1.09161	0.166579	1.0251	1.02659
	0.977788	0.759512	1.97536	1.70408
	0.693171	0.145537	2.8473	2.15304
	0.593194	1.04667	0.186927	1.10732
	2.60471	0.996334	0.0894649	2.63859
	2.71352	0.927713	1.55879	3.99462
	0.463002	1.79253	1.59091	1.32015
	2.86421	0.475813	4.57025	4.27792
	0.742633	3.69459	4.40523	0.910485
	3.97033	0.711814	0.414077	0.539195
	0.465264	0.269837	3.07456	1.22965
	4.48263	0.452071	1.18715	1.19192
	4.15285	1.16578	0.669038	1.66239
	1.89768	0.569824	0.422143	2.06391
	0.430991	0.168764	3.34503	0.895906
	0.690837	0.797899	1.02858	1.10246
	0.374803	0.817653	0.872227	2.34316
	1.25536	2.70136	0.784195	2.59415
	2.11751	0.332109	2.755	0.12097
	2.03581	0.407285	5.06279	0.225577
	1.89159	1.89499	3.35595	0.780552
	0.606149	1.16092	3.65537	2.33913
	1.71173	0.258911	3.25499	0.921554
	1.17099	0.625254	2.01418	1.72018
	0.576551	3.17261	5.69117	3.94802
	0.613764	4.67308	4.12515	0.186119
	2.50071	2.75265	2.71271	2.84296
	0.229655	2.89719	2.5558	1.86176
	0.507294	1.89956	5.37358	3.71612
	2.15751	4.20755	1.79813	1.83175
	1.63482	3.81312	0.197977	0.664315
	1.64791	0.73358	0.0818993	1.14035
	0.633284	4.07898	2.12319	0.549414
	0.673545	0.205785	4.42457	1.10145
	2.66361	0.433641	3.81577	1.94071
	0.807323	4.73308	0.39998	2.69084
	0.339963	3.55699	4.6408	1.758
	0.43383	2.41432	6.11401	0.195696
	0.440844	0.599161	1.97659	1.73607
	0.545972	5.01627	4.25012	0.304231
	1.70945	1.96072	2.64548	0.240525
	2.30389	0.447063	2.27411	0.273876
	0.697099	0.235557	3.02191	0.968353
	1.9957	0.700122	0.343846	0.756373
	0.146944	0.166567	3.30749	2.77458
	3.34135	1.36382	1.55452	1.37239
	1.66447	1.09132	1.26071	0.13762
	3.27709	0.0885623	3.00231	0.470967
	0.271187	0.257089	0.735254	0.74289
	0.132566	0.801108	1.89335	1.36583
	0.940997	4.65192	1.51822	1.5663
	0.102802	0.268714	3.79351	1.10385
	0.0858974	1.03078	4.3094	3.89719
	2.97265	0.13887	3.76697	0.858333
	0.5953	0.586952	0.672944	3.83574
	0.720241	2.11045	2.80507	2.15358
	0.477304	1.23216	3.54274	2.5121
	3.52328	1.54909	1.03322	1.41619
	3.2689	1.72327	3.59136	1.62804
	0.20554	0.943376	3.29545	3.56227
	1.06423	1.56912	3.15959	2.79256
	3.7451	0.86591	3.07018	2.97855
	0.321553	0.0986477	4.0764	3.04329
	4.37183	1.13174	3.59923	2.2898
	0.617773	1.68023	4.07396	3.22332
	1.26807	1.18003	1.93475	3.12244
	4.00601	0.669862	1.87105	2.51323
	3.01691	1.15205	2.76513	2.38259
	2.59302	1.78872	3.17855	3.53789
	0.253036	1.94419	0.142435	3.71272
	0.745578	0.662168	3.34654	1.85525
	0.535633	3.29363	2.52109	2.89585
	0.45417	1.23519	0.959744	0.433415
	0.374925	1.22236	4.38401	0.387331
	0.119957	1.5589	2.05813	2.74024
	1.03189	1.37236	0.770865	2.81731
	1.21072	1.20497	0.416661	0.624614
	2.27215	0.557532	4.61141	4.76731
	3.7261	1.56401	5.81438	3.29263
	1.47577	1.4193	2.84874	3.65176
	2.01635	1.87714	2.66252	2.49414
	1.22702	1.04306	6.22125	0.345124
	3.22246	1.67506	4.49587	1.90883
	2.84853	1.96218	3.20043	2.69433
	1.92523	1.29548	2.11453	0.577231
	0.44114	1.53549	0.548809	3.15638
	1.5549	1.6389	0.342949	2.38029
	3.47921	1.27599	8.45	1.72562
	2.47167	1.79048	0.167179	2.56357
	0.564588	1.87179	1.47511	3.48383
	2.92256	2.1065	4.37779	4.44231
	0.991019	0.0790467	3.78631	0.883542
	3.08958	0.858869	4.85505	0.865919
	0.393964	0.206899	2.37035	2.76157
	2.77489	1.45789	4.22582	0.850202
	1.20637	1.41941	0.713964	2.75862
	1.47413	0.35364	4.67669	1.08296
	1.55873	1.93196	0.293956	1.51333
	0.134587	0.532187	4.73288	0.529341
	0.178805	1.26753	4.9466	3.74465
	4.26113	0.859981	0.651932	1.38033
	1.8957	0.791073	0.832209	1.84044
	2.05705	0.15981	1.39263	0.155539
	2.97918	0.696671	4.07589	3.22357
	2.95151	0.891832	0.326885	1.89223
	1.56722	3.13746	0.532013	0.318093
	1.98224	0.857744	0.440494	0.439568
	0.0934586	1.87423	3.78002	1.01459
	4.21209	0.552092	4.34316	0.978322
	1.22027	2.18834	4.40838	2.93365
	3.98026	0.761746	3.75147	0.373757
	2.29407	0.264045	3.95868	2.98519
	1.50444	1.8369	3.44196	3.14386
	0.342051	1.67092	3.31969	3.20021
	0.788031	2.87146	0.985984	3.24639
	2.4427	0.570067	3.32794	0.938839
	3.86349	3.33018	2.18742	0.224267
	2.69104	0.428238	4.18308	1.26231
	4.4606	2.99722	1.10209	0.687226
	0.648119	1.3898	0.44719	0.245706
	0.208409	3.38681	1.948	1.03852
	1.39204	1.3359	3.46817	0.68109
	0.446416	1.07082	3.56065	0.660649
	0.539236	1.2665	3.42874	0.549817
	2.58057	3.25339	0.636754	1.02981
	1.91181	1.23742	4.58217	0.556853
	1.10907	1.20232	1.19543	1.40397
	1.75657	0.844374	0.552232	1.02195
	1.82399	0.342051	0.450281	1.98559
	2.93203	0.360217	4.3951	1.91331
	2.96412	0.342113	3.04964	0.167272
	2.31788	2.51284	3.61256	0.104856
	2.78106	3.03406	4.16697	1.58817
	2.55573	2.81882	3.41585	1.02163
	3.00984	1.03135	4.14002	1.03003
	3.0129	2.65945	4.15841	1.2875
	3.78695	0.212982	0.317105	1.30991
	2.9573	2.73051	1.6634	1.92856
	0.686813	0.102039	0.111558	1.32177
	2.9219	0.554962	0.218455	2.90275
	0.546764	0.714967	0.355666	0.128445
	0.446912	2.83431	1.45761	1.60559
	2.829	2.49138	0.0911158	1.1563
	2.65183	3.61254	3.65008	0.949522
	1.98792	2.5804	3.38397	0.470864
	3.31468	1.15558	4.11163	0.306364
	0.666806	0.428892	4.4263	4.48951
	0.656182	2.33105	3.43532	0.125994
	1.23685	0.434927	1.33749	3.4766
	0.428429	0.164667	3.27058	2.4143
	2.18053	2.26457	5.03138	4.25335
	0.428036	0.226358	0.915817	1.20918
	0.0804074	0.200394	0.566542	0.205246
	0.439416	0.313862	2.72394	0.88028
	1.397	1.03077	4.24014	3.01648
	1.10172	1.70775	1.71362	0.670823
	0.293384	0.52706	0.114159	3.62171
	0.286717	1.01809	1.82969	2.22485
	1.39258	0.137905	3.05918	1.61863
	1.04189	1.45873	2.25345	0.650406
	0.374078	2.524	2.96038	0.729344
	0.463785	1.88615	1.51951	3.66631
	0.45883	2.56764	3.08098	3.06319
	3.21548	2.43909	4.45481	2.89571
	2.63489	2.42554	3.6	2.12782
	3.44	0.370257	4.55432	3.23958
	1.72811	0.415851	4.19111	2.95568
	1.18921	0.457988	2.23526	1.62992
	0.108097	0.27908	3.40057	0.4635
	3.46495	2.37868	3.5451	0.694944
	0.818727	3.15822	3.61105	0.512906
	0.211039	2.83345	0.124879	3.85513
	1.10719	3.26276	0.098252	4.11228
	0.164897	2.20788	0.274664	3.57608
	0.562049	0.556075	0.560454	3.36068
	0.862731	2.92245	0.280187	3.02711
	0.761742	1.6397	4.56595	2.89502
	0.256836	0.525659	0.108391	3.38921
	1.32214	2.43275	4.58611	0.967658
	1.42251	3.49315	3.87684	1.14017
	1.56593	0.0792107	2.90009	0.574589
	1.62802	0.147197	4.41865	0.321444
	0.51523	0.562809	3.46451	1.60785
	0.454707	2.35158	0.433481	0.861207
	0.282667	0.281569	0.147897	2.48382
	2.54875	0.20461	4.08255	1.70151
	1.85189	1.03042	4.38116	1.47115
	2.8283	3.1806	4.44049	2.06009
	1.86833	0.325981	0.334745	2.95
	2.98499	0.472673	0.252553	3.48979
	0.41404	0.768656	3.39355	0.0933617
	0.12705	1.0943	3.28568	2.26242
	1.36201	0.128542	0.114836	0.990649
	1.35218	1.36757	0.656554	0.821287
	1.4297	1.36871	4.15052	0.578063
	2.97898	2.30589	3.27606	0.514744
	2.87107	0.946856	0.397378	0.740856
	0.36376	0.158352	4.29844	1.44704
	2.91948	0.590256	0.868372	1.98544
	0.091453	0.584417	1.1659	1.95596
	0.678929	1.24949	3.76874	0.71731
	2.90901	0.733607	1.05535	0.404646
	1.11619	0.0892515	0.849792	3.1265
	2.65801	1.06013	0.157897	1.92339
	2.29601	1.06901	4.15424	2.81589
	2.01565	1.46868	0.229223	0.866345
	3.12433	1.47714	5.14917	0.667506
	1.02878	0.0881042	3.94768	0.728924
	0.758217	0.811223	1.01488	3.14286
	1.30408	0.351141	0.890828	1.93068
	3.92561	0.536098	2.77342	1.24862
	1.51443	2.22157	3.80974	1.15542
	0.747165	2.73408	0.578436	0.902255
	0.691429	2.97397	2.53981	0.514547
	3.6431	0.309114	0.521068	1.52293
	1.70114	2.09732	1.43082	3.68674
	2.44965	3.14458	0.958803	0.467264
	0.512119	1.56165	0.0933617	0.528227
	1.00141	0.755356	0.894163	4.52062
	3.25689	3.03657	0.535741	2.80736
	2.70205	0.800812	1.35524	0.0789295
	1.31983	1.21993	0.174888	4.9161
	0.697216	0.705648	2.94187	3.33515
	1.12965	2.51936	1.08577	0.185625
	1.3111	3.78489	0.615722	1.47219
	0.604987	0.0896434	0.827123	2.76047
	0.126863	1.1444	1.98441	1.02686
	3.07767	1.46775	0.772222	0.426221
	1.78077	0.14835	0.563913	0.570436
	2.12268	0.222937	1.32396	0.442616
	3.46013	2.46731	3.70673	1.52817
	0.118593	1.01217	1.47731	3.50955
	2.2441	2.34063	1.52189	2.05594
	3.57289	2.22254	2.71444	0.44859
	1.33092	1.22274	1.98571	2.19449
	1.25134	1.44992	1.64973	0.306158
	1.83394	4.77885	0.915154	0.197472
	1.70225	1.3989	0.484275	2.22095
	2.42937	2.52429	3.30327	2.21558
	1.76912	0.604244	2.57348	0.270916
	2.8492	0.344739	0.632799	1.1266
	2.11496	2.61122	3.86868	0.477184
	0.182575	0.381413	3.15149	1.81688
	0.102762	2.55474	3.7396	0.57138
	0.865879	0.148534	0.398764	2.97095
	0.147209	1.62105	0.0936315	0.515532
	2.11624	1.71336	0.828551	0.530835
	2.85983	1.34326	0.430859	0.0808209
	0.712009	1.05954	3.30549	2.74858
	2.03337	0.939423	4.22949	0.230442
	0.146831	2.00709	0.470821	0.684897
	1.59577	1.72888	0.83456	1.86648
	1.45727	1.98497	3.29685	0.66075
	0.624695	0.713542	1.62234	2.35719
	3.53932	1.25876	1.63829	3.62401
	1.1087	0.635417	1.48961	0.19141
	1.28462	1.18999	0.646185	3.15077
	1.43976	2.08777	1.85811	2.31911
	1.65991	1.10096	0.378406	2.4149
	1.63424	0.877977	3.4953	3.39151
	1.85217	0.677397	0.852818	2.77122
	3.13822	0.608992	0.860249	1.47526
	2.44112	1.19505	3.28673	2.25951
	0.843007		1.82468	0.636923
	0.683109		2.31923	2.20966
	1.40422		0.732692	1.32707
	0.774176		3.40433	2.2659
	2.6037		3.55626	3.60481
	1.7428		3.5986	1.03586
	1.68258		2.66589	1.68224
	0.675949		3.95021	0.852562
	0.28368		5.53448	3.32163
	0.31932		2.81343	2.7188
	0.324216		2.5934	0.824286
	0.258829		2.80812	2.23929
	3.38315		2.5762	1.22235
	3.33753		3.36275	1.87212
	1.5261		2.40449	0.135166
	0.244336		1.58013	0.446906
	3.0974		0.37438	2.26657
	2.61705		3.09159	0.64937
	1.23292		2.02418	0.513912
	0.451495		3.34911	0.105698
	0.372523		1.08573	0.212969
	3.57152		3.03017	0.381413
	3.21489		2.74797	0.819292
	3.19049		2.80246	1.28179
	1.32477		2.34161	0.678138
	1.07603		2.04505	2.34744
	2.15306		0.649461	2.17593
	1.0651		0.617259	1.15952
	1.49819		3.09083	0.739645
	4.76661		2.66433	2.33485
	3.12538		0.432369	2.67045
	1.02849		2.1875	2.23867
	0.380769		0.164586	0.38551
	0.15289		2.95621	0.395225
	0.680361		3.79003	2.49634
	1.98983		2.63077	0.874199
	1.14898		0.633893	1.07049
	3.01085		2.3149	0.344526
	4.07821		2.6909	2.88904
	0.790865		3.82152	2.26492
	5.52596		0.175899	2.17821
	3.86569		0.280769	0.534462
	2.38179		0.100952	0.134986
	1.55475		0.796886	1.7989
	2.75622		2.78296	1.50166
	2.57031		3.32623	3.24818
	2.57051		2.9914	3.65236
	1.71584		0.120122	0.151429
	0.386522		2.77764	3.48004
	0.244572		0.76206	2.7772
	2.64293		3.52239	3.22216
	0.311214		3.17333	0.796584
	4.63197		2.37683	2.59226
	0.726404		0.710969	1.02878
	3.59357		3.12009	1.55863
	1.82546		0.974305	3.87666
	0.330669		0.339759	2.0505
	1.03486		2.82028	1.62614
	2.52841		2.92342	2.25533
	1.72149		2.13024	0.581029
	1.19247		3.53303	0.358156
	3.48403		0.410154	0.901798
	2.78596		0.423264	0.55837
	1.67018		0.59913	1.70358
	0.118071		1.49558	0.844423
	0.986813		2.11253	2.9234
	0.487476		3.15988	0.598211
	1.14316		0.381327	2.35385
	2.29865		2.73322	4.0257
	2.31488		4.01721	1.91704
	2.38689		2.73216	0.318428
	1.4032		4.74322	1.83077
	2.58946		1.62695	1.06663
	3.01519		1.65394	0.934949
	3.34375		0.889096	0.67334
	5.49145		0.0936166	0.46327
	1.56834		0.201479	2.80026
	2.27577		1.71605	0.798623
	3.01727		1.63291	0.134477
	3.25274		3.22615	2.7492
	2.17798		0.424281	0.542172
	1.99851		0.820716	0.624042
	0.314259		1.76713	0.128445
	0.147116		0.377472	0.37506
	3.15893		0.175635	2.20572
	1.10329		0.649893	0.20864
	3.43601		1.03052	0.246744
	2.22436		2.44165	1.65344
	1.62471		3.18507	0.767066
	0.321519		2.5886	0.191614
	1.02712		2.28049	0.58194
	2.86179		0.617974	0.686066
	2.84261		1.30649	3.14494
	0.513651		2.5457	1.58066
	0.0791986		4.11765	2.89584
	0.106101		1.20537	1.11405
	1.02192		1.29964	2.02493
	1.22574		1.10827	2.215
	0.24605		0.236643	0.89106
	0.207482		1.03042	2.98769
	0.808964		1.22214	4.16231
	1.94388		0.247814	3.93269
	3.48743		0.79466	3.07773
	1.89384		0.234465	2.28497
	0.809243		0.260599	3.67166
	0.195053		4.45564	0.653019
	0.469642		2.39927	2.62739
	3.36517		0.966538	1.01138
	0.353048		1.39793	1.53785
	1.37668		2.27531	3.04056
	3.02238		1.61718	3.1586
	0.677546		0.110228	2.54183
	0.910421		0.343164	4.89062
	0.688327		4.64075	3.29477
	1.67929		0.865856	2.22799
	0.676704		2.1355	3.93864
	0.80698		2.40281	3.30471
	0.238412		3.10551	0.490573
	0.264466		2.39705	2.7456
	0.339516		0.428828	3.31752
	0.800931		2.56461	3.22019
	0.513999		2.66183	1.6164
	0.636488		2.36625	2.31426
	0.718574		3.53902	0.262683
	2.89483		0.190882	3.48068
	2.75037		3.44375	0.571509
	2.17582		0.353691	1.24396
	0.332108		0.813615	2.57009
	1.5046		1.92426	2.73802
	0.156177		2.30634	0.516031
	1.15557		1.27923	0.343829
	2.93269		1.86	1.63133
	2.94332		2.392	1.76648
	3.56663		0.963536	1.22753
	2.63413		2.16959	0.0916402
	1.8182		2.13445	2.63676
	3.56466		0.266074	0.343145
	0.0854831		1.0518	0.873662
	1.6931		2.85707	1.06857
	0.305915		3.30648	0.739214
	4.34017		0.872424	3.17724
	0.578125		3.26397	2.67923
	1.93857		0.984745	3.59369
	3.26738		2.93946	3.72464
	0.128506		1.25321	3.7501
	2.13348		2.63862	0.290488
	3.46981		1.03059	0.928595
	1.89085		1.43124	0.473922
	3.59101		3.64052	0.737819
	0.119328		0.895366	1.53435
	2.30694		1.23985	2.14015
	0.307959		1.10385	1.65251
	0.614138		4.41264	1.71097
	0.0933507		2.21959	1.49863
	2.00062		4.20986	2.39426
	0.685498		3.58623	2.9307
	2.2891		2.91645	0.944302
	2.78128		2.24887	1.87008
	0.631634		0.293119	0.912465
	1.34756		1.02933	3.73077
	4.32127		3.1145	3.39061
	3.63744		0.83892	4.16968
	1.03038		2.61736	3.6834
	4.2378		2.91418	1.49501
	0.278495		0.341817	2.33775
	0.408539		0.0858974	2.01879
	0.475287		5.15118	0.262106
	1.23905		1.03046	0.821195
	1.48339		2.96727	1.75704
	0.488887		0.538185	0.765202
	4.1116		0.0934677	3.90562
	0.281002		1.12042	0.365975
	0.0790062		1.55904	4.63133
	2.09484		2.8629	0.22165
	2.25471		3.17815	1.71453
	0.565673		0.164662	0.45778
	2.37368		3.0492	0.120474
	2.51301		2.2155	1.17322
	2.39178		1.88372	0.770768
	0.227103		0.571298	1.2071
	1.91035		1.02607	1.43727
	1.47208		1.05474	0.395015
	3.37757		1.43152	0.423729
	1.20266		2.22702	0.969947
	0.298898		0.519105	2.3019
	0.620785		2.23727	0.617362
	1.23636		0.925162	2.25987
	1.56891		1.13473	3.73762
	1.13186		2.1107	0.162685
	1.1684		0.234906	3.666
	1.94736		2.58867	0.803728
	5.07508		3.82416	0.832875
	3.47409		3.31945	1.44963
	1.94607		1.83717	0.293186
	2.34081		3.34142	1.03107
	1.02926		2.47964	0.881731
	2.11622		4.56335	3.47381
	0.40337		3.12492	3.63799
	0.351609		0.720865	3.01236
	3.73179		2.66403	0.509639
	3.65171		0.283289	1.16774
	1.80269		3.34323	3.47898
	0.158421		2.33217	0.136815
	1.36208		0.61045	0.137193
	1.84581		0.82561	0.257083
	0.114316		2.73318	3.75293
	2.12324		3.1245	3.58683
	1.26263		1.4938	3.57885
	2.64064		3.09279	0.990939
	0.342504		2.63593	0.447227
	1.9427		2.82046	2.71179
	1.24036		0.263149	0.472335
	2.22774		1.26377	1.05457
	0.166944		0.504955	0.515591
	0.383773		2.06709	2.66327
	0.27662		3.62821	1.18923
	3.41538		0.572549	0.690653
	2.4629		2.42047	0.957291
	1.53637		2.87054	0.798746
	0.147178		1.09769	1.6823
	0.437708		4.71154	0.128767
	0.534251		1.11521	1.03046
	0.127524		0.582525	2.75083
	1.03994		2.92899	0.0948879
	2.68256		0.415633	2.7342
	2.60391		2.83974	5.08128
	2.14993		2.53497	0.428885
	0.258366		0.81791	0.163373
	2.05803		0.0999001	1.80513
	2.33942		0.617652	0.266674
			0.822828	0.682852
			2.46633	1.75294
			1.42823	1.71119
			2.02826	0.647802
			1.55232	1.0871
			2.69941	2.27121
			3.26521	4.10688
			0.213551	1.08698
			0.131054	3.18361
			2.5907	0.117657
			2.71051	0.993577
			2.40128	3.67821
			3.89275	3.27695
			0.452134	0.146882
			2.42149	4.58595
			0.330549	2.05572
			0.52969	3.98037
			1.08004	3.38292
			1.42818	3.0874
			0.219351	3.6702
			1.14565	0.120188
			1.05892	3.98792
			2.13543	2.68232
			2.435	0.735165
			2.18658	3.96718
			2.70897	1.16676
			1.44928	0.241173
			0.130599	1.65268
			0.626845	0.65146
			0.536098	1.13841
			1.57779	2.66718
			0.611674	0.715831
			2.92421	0.811926
			2.94111	0.40507
			0.487329	1.6467
			2.69072	1.02967
			1.34183	1.26657
			0.844741	0.19854
			1.94205	1.96038
			0.517281	0.294139
			0.412308	0.902587
			1.97036	3.36642
			2.6621	0.122412
			2.51789	2.36013
			2.52827	0.281229
			0.340825	1.31014
			3.22488	1.0391
			2.20755	4.08235
			1.38824	0.748837
			0.211457	3.39115
			1.60653	3.04062
			0.619383	0.29409
			3.35101	3.25639
			2.74774	0.291947
			0.608961	4.19206
			0.803735	1.30092
			0.730399	0.162845
			1.0434	3.04387
			1.07787	1.44102
			2.36433	1.83054
			3.51222	0.840809
			3.0056	3.70947
			0.0982473	3.75999
			0.0896733	0.598013
			0.63664	2.0822
			0.175797	1.3187
			0.382916	2.33757
			0.0803396	2.33909
			0.739904	0.600361
			3.38496	1.67397
			3.34698	2.00299
			2.58607	2.47671
			2.99919	0.220392
			2.05966	0.47883
			3.43676	2.34463
			3.65769	1.59865
			4.07255	1.94036
			3.48821	0.342307
			3.73317	2.88058
			2.55564	2.87231
			2.95518
			3.57733
			1.7384
			0.638641
			0.709632
			1.81651
			3.23663
			0.798194
			1.85831
			0.518317
			2.94501
			2.834
			1.21164
			1.28117
			1.422
			2.63846
			2.66371
			0.770576
			1.03308
			1.23774
			2.88221
			4.03371
			1.95414
			2.80978
			0.690576
			5.27308
			2.44597
			2.69036
			2.48382
			4.11296
			3.85601
			2.39809
			3.20815
			3.75172
			1.71298
			3.50618
			1.88961
			3.25609
			3.85589
			4.00663
			0.622464
			4.27255
			1.01848
			0.127688
			0.488227
			0.440282
			4.76987
			4.08363
			0.678396
			1.89328
			1.87238
			1.21687
			2.52175
			1.95489
			1.64677
			2.38195
			3.52312
			1.48686
			0.723229
			1.20591
			2.97905
			2.43842
			2.52721
			2.5534
			0.186622
			0.643994
			4.39453
			3.63705
			0.600921
			0.453832
			1.24435
			2.38195
			1.20414
			1.68134
			0.452561
			2.01639
			2.11747
			1.72847
			1.80132
			3.55115
			3.47912
			0.890715
			4.24471
			4.36117
			2.85187
			3.05855
			3.01618
			0.148398
			0.62525
			1.27648
			0.483333
			3.17794
			2.39336
			1.18916
			1.23864
			1.03831
			0.517621
			0.486005
			2.28868
			0.647336
			3.66995
			2.98219
			2.84079
			2.8372
			2.52394
			3.56882
			2.82182
			1.13689
			0.279476
			0.915124
			4.75473
			2.67448
			2.28104
			3.39855
			1.58308
			1.97582
			1.9029
			0.777233
			3.57279
			0.834239
			3.13081
			3.44284
			2.40173
			2.87602
			0.948033
			1.76456
			0.502683
			0.131674
			0.181311
			1.37152
			4.426
			3.55341
			1.53403
			1.58118
			0.49801
			2.17828
			2.14247
			0.256283
			3.70584
			3.18069
			0.426379
			2.06045
			2.43738
			2.37839
			1.55925
			1.0578
			0.257537
			2.01661
			0.7105
			0.108429
			2.63542
			2.38583
			1.15942
			0.801282
			2.79736
			3.33462
			2.95858
			1.84583
			0.343969
			2.74729
			3.33229
			1.13285
			0.313682
			3.7642
			0.442706
			0.0843488
			2.98008
			1.77529
			3.64703
			1.77809
			0.188815
			2.90105
			0.446256
			3.08815
			0.485469
			3.65542
			0.472871
			0.8746
			0.48789
			1.21854
			0.65207
			2.11738
			1.73648
			0.293662
			1.42266
			1.90027
			0.657683
			2.58811
			2.46962
			1.48372
			0.468189
			1.74986
			3.9943
			0.904664
			2.24675
			0.784731
			1.84745
			2.63077
			0.161425
			3.70101
			3.69829
			3.29412
			0.258925
			2.50919
			1.02582
			2.77596
			0.194863
			1.12493
			3.60312
			2.43095
			0.19652
			3.05962
			0.42273
			1.03244
			2.20087
			2.84448
			1.59481
			0.527857
			2.55558
			3.45405
			0.14652
			2.74372
			3.60592
			1.14989
			1.26086
			0.279551
			1.27344
			3.7395
			3.1879
			2.82374
			3.79808
			0.474172
			0.588736
			1.02516
			3.55696
			1.13214
			1.99149
			1.5151
			1.26568
			0.11455
			0.425585
			2.41716
			2.68277
			3.63229
			1.09337
			2.95757
			3.60048
			0.344197
			0.453861
			3.55385
			0.627824
			1.86695
			2.58222
			4.11326
			3.16052
			2.34231
			0.545146
			3.44218
			3.22714
			0.915116
			3.20218
			0.478371
			0.0855661
			3.43311
			3.97717
			0.87289
			1.57488
			2.49998
			3.68885
			3.15973
			2.49243
			1.67688
			2.50919
			0.801728
			3.04089
			1.23002
			1.66996
			2.7526
			0.378774
			1.04919
			2.97412
			0.550459
			0.317446
			0.0940054
			0.694336
			0.723143
			0.63909
			0.184989
			2.31143
			0.549657
			0.608872
			2.85856
			2.70481
			3.53921
			1.01585
			0.67951
			2.74769
			0.664283
			0.684101
			1.98891
			2.29764
			3.97096
			3.20612
			3.2273
			0.447419
			4.06838
			0.149715
			2.49717
			2.88505
			0.619662
			2.40639
			0.157693
			0.492324
			3.00762
			1.83534
			0.770075
			1.15755
			2.30157
			1.13994
			3.40068
			0.411545
			0.610457
			0.218962
			2.31201
			0.740137
			0.820104
			1.21013
			2.35
			0.322643
			1.13261
			0.342521
			2.21565
			0.294057
			2.15539
			3.44412
			0.0789091
			3.18423
			3.37424
			3.97099
			3.77105
			0.431154
			1.42755
			1.62731
			2.79037
			0.785878
			2.70062
			0.749582
			2.44808
			2.88978
			3.77619
			4.03597
			0.199645
			4.35974
			0.342926
			2.82484
			2.84211
			2.92061
			3.85245
			3.11686
			2.84255
			2.77031
			3.28787
			3.31944
			2.55205
			2.71167
			3.26855
			2.8348
			3.85721
			1.26115
			0.296391
			2.10792
			0.407298
			0.936953
			2.82057
			2.97335
			3.62038
			3.13124
			2.84926
			1.12577
			1.41664
			0.301351
			0.837515
			2.61165
			2.20709
			1.71153
			1.16154
			1.65204
			1.41962
			1.27492
			1.37535
			3.03205
			0.540757
			1.26184
			0.336583
			1.517
			1.24713
			3.04773
			0.514387
			0.433395
			0.924394
			0.688202
			1.78439
			1.50801
			0.65904
			0.837799
			3.49535
			0.171474
			2.05021
			1.51969
			0.426215
			1.35582
			4.22868
			3.84521
			3.01684
			0.334818
			0.836194
			2.21935
			2.29964
			0.711188
			3.467
			3.87489
			3.84849
			2.99956
			0.608384
			0.39886
			0.275349
			1.60783
			1.02245
			0.218415
			3.28615
			3.24332
			2.00036
			0.37604
			0.20226
			2.32676
			1.08053
			1.86695
			1.95271
			3.49397
			2.63
			1.0603
			3.35198
			2.03917
			2.9809
			2.45844
			2.56126
			4.05435
			3.80794
			1.02917
			3.60635
			0.2431
			1.59997
			2.44498
			1.64321
			1.1466
			0.536733
			0.32405
			0.454619
			0.138877
			2.20712
			0.930202
			2.0549
			4.10978
			1.3376
			1.11724
			1.18303
			1.90198
			1.37358
			3.0163
			2.4005
			3.77938
			3.56545
			4.00659
			0.514229
			3.51533
			0.457479
			0.331365
			0.557988
			1.91849
			3.42665
			1.74792
			1.49079
			3.44275
			0.114225
			0.71859
			1.58303
			0.241583
			0.321957
			3.80502
			1.17665
			1.05538
			1.56776
			2.24359
			3.53037
			0.202107
			1.45044
			2.27099
			0.473105
			1.65081
			1.32547
			3.31368
