# Supplementary material for: Huntingtin recruits KIF1A to transport synaptic vesicle precursors along the mouse axon to support synaptic transmission and motor skill learning
Source: eLife. 2023 Jul 11;12:e81011. doi: 10.7554/eLife.81011 (PMC10365837; doi:10.7554/eLife.81011)
Supplement: Figure 6—source data 2. [file elife-81011-fig6-data2.xlsx]

## Sheet: Figure 6b-Retrograde velocity
	Wild-type/sh-Scr	Wild-type/sh-KIF1A	HTT-SD/sh-Scr	HTT-SD/sh-KIF1A
	-1.32728	-1.43327	-3.44698	-0.553731
	-1.71378	-0.521142	-1.57618	-0.32718
	-2.35008	-2.22307	-2.18185	-0.268985
	-1.71222	-1.34413	-0.692178	-0.596711
	-0.864206	-0.656663	-0.869333	-0.148312
	-1.1623	-0.162454	-1.08824	-0.218786
	-2.06076	-0.256629	-0.846644	-0.750247
	-1.98914	-1.02945	-1.34945	-0.960257
	-1.31993	-1.61459	-1.90687	-0.0899576
	-2.09412	-0.118444	-1.25002	-0.573509
	-3.19415	-0.109703	-0.67711	-1.59016
	-3.02244	-0.833246	-3.32195	-0.276046
	-0.817755	-1.40452	-1.42797	-1.02471
	-1.14484	-2.67353	-1.02676	-1.84895
	-2.06079	-1.2	-0.364961	-0.822238
	-2.25666	-0.656705	-1.15093	-1.89881
	-0.191463	-2.18862	-1.01457	-0.384328
	-1.0475	-0.319303	-0.710596	-1.23961
	-1.54359	-0.898766	-0.756115	-0.257856
	-1.81878	-0.552341	-1.65316	-1.4342
	-1.02901	-0.665487	-1.7052	-0.942916
	-0.7527	-1.80981	-0.605539	-0.745765
	-1.04134	-1.475	-0.205702	-0.607439
	-0.565396	-1.77937	-2.33154	-0.858321
	-2.29709	-1.19301	-0.240096	-0.772013
	-0.799673	-0.388535	-1.48877	-1.61801
	-0.774859	-1.57208	-2.24314	-0.40382
	-3.00545	-0.584845	-2.40989	-2.04696
	-2.19947	-1.11351	-0.850723	-0.542021
	-0.788269	-2.67336	-1.84875	-0.2928
	-0.846628	-1.72685	-0.404406	-2.09284
	-1.28132	-0.792261	-0.712905	-0.411945
	-1.73859	-1.5222	-1.46279	-1.44372
	-0.423702	-1.35853	-1.08719	-0.448401
	-0.442653	-0.994362	-1.74233	-1.79844
	-2.68939	-0.579226	-2.2259	-2.03111
	-0.497722	-1.34231	-0.469401	-1.29899
	-0.208447	-1.25535	-0.443468	-0.452796
	-0.478275	-0.497745	-1.91838	-0.843338
	-3.12459	-2.18882	-2.1583	-1.12261
	-1.17624	-0.817998	-2.92039	-1.25289
	-1.4336	-0.326046	-2.24456	-0.558526
	-2.52418	-0.300999	-1.57751	-0.209641
	-0.997318	-1.73609	-2.19334	-0.26419
	-2.91603	-3.1738	-0.548993	-1.86985
	-0.695426	-0.973274	-2.72819	-2.47308
	-2.08563	-1.7604	-3.51176	-2.20862
	-0.449251	-1.53408	-0.499997	-1.48856
	-3.04331	-0.365391	-1.77175	-1.17281
	-1.41871	-0.50006	-1.208	-1.10877
	-0.256538	-0.795192	-0.807817	-0.718077
	-0.449967	-0.190775	-0.857832	-1.46273
	-0.656633	-2.53423	-0.686425	-1.75538
	-0.816202	-0.381004	-1.39917	-0.687724
	-2.06546	-0.188018	-1.41421	-1.69849
	-0.391267	-1.47222	-0.233306	-2.61979
	-2.49076	-1.67233	-1.47328	-0.105612
	-1.80136	-2.10649	-1.99279	-1.28584
	-2.90788	-0.555919	-0.444725	-0.823625
	-1.06725	-1.41504	-0.449759	-0.996635
	-3.17031	-2.86363	-2.76231	-0.745398
	-0.137266	-2.3464	-0.601682	-0.625982
	-2.88212	-1.64391	-1.76761	-0.984244
	-1.0542	-2.19547	-1.09197	-1.04884
	-0.965937	-2.19107	-1.76639	-0.621244
	-1.57674	-1.89748	-0.424153	-0.458634
	-3.74441	-0.951214	-2.62544	-0.289848
	-0.320012	-0.808857	-1.54411	-2.05571
	-0.917297	-0.435678	-3.50935	-1.46841
	-0.547382	-1.66511	-2.27463	-2.28934
	-0.726848	-1.49594	-3.08815	-1.28483
	-0.105926	-1.27096	-3.05137	-0.59399
	-1.41587	-0.727325	-2.53388	-2.63791
	-0.55953	-0.105147	-0.420151	-1.90273
	-0.741059	-0.373171	-0.886006	-0.384783
	-1.57489	-0.482801	-0.920082	-1.20292
	-1.23052	-1.27618	-2.52934	-1.47545
	-0.801711	-2.31019	-0.743462	-3.22613
	-1.60377	-1.23953	-1.59178	-0.789171
	-0.313016	-2.79808	-0.537773	-1.0542
	-0.733615	-2.7816	-0.481202	-0.417382
	-1.02804	-2.36332	-0.440563	-0.411429
	-1.03215	-1.93492	-0.469015	-0.503535
	-3.54426	-2.51431	-0.552007	-0.461169
	-1.28664	-1.96985	-2.24408	-0.715264
	-0.734832	-2.8342	-2.17986	-2.60034
	-0.169681	-0.864973	-1.66667	-1.79537
	-3.31202	-0.683156	-0.728096	-0.515719
	-1.19718	-1.82448	-1.7268	-3.05239
	-0.281985	-2.48718	-0.906172	-1.45309
	-2.79296	-1.69318	-1.63649	-0.771592
	-0.246678	-1.87841	-1.2136	-0.503897
	-0.607247	-1.33084	-1.3125	-0.805241
	-0.686667	-2.13462	-0.796299	-0.663415
	-0.514458	-2.98956	-0.568877	-2.11709
	-2.05597	-0.243068	-3.25978	-1.90666
	-2.27695	-0.596118	-2.1875	-2.39269
	-0.152985	-0.212318	-0.814099	-2.08704
	-1.64338	-1.57385	-2.02037	-0.25673
	-1.81691	-1.07172	-2.82637	-1.01518
	-2.78846	-0.729915	-2.76515	-1.21387
	-0.199565	-0.977636	-0.650272	-0.709728
	-1.08152	-1.353	-2.43953	-0.267937
	-0.383952	-1.29393	-4.4001	-1.21588
	-0.713476	-1.98724	-2.41943	-3.15373
	-0.62621	-3.00488	-0.0954051	-2.47692
	-0.230435	-2.31506	-3.08771	-0.83158
	-1.96289	-2.11201	-3.43077	-2.04463
	-3.7818	-1.48826	-0.753059	-0.128878
	-3.87808	-0.131564	-2.94073	-2.00879
	-3.3557	-2.1008	-2.36825	-0.209762
	-1.60455	-2.05786	-1.65945	-1.08836
	-2.38441	-0.336054	-1.68891	-2.52775
	-3.11026	-0.654914	-1.73516	-0.18772
	-1.60741	-1.18983	-1.0141	-0.729602
	-0.840201	-0.849471	-1.6122	-1.04299
	-1.7756	-0.35504	-1.19569	-2.80354
	-2.22672	-0.833018	-1.3683	-1.22004
	-0.873122	-2.60962	-1.54696	-1.77872
	-2.10262	-1.62983	-2.26882	-1.86196
	-0.692317	-2.30092	-0.531921	-2.06146
	-2.42531	-2.34774	-2.12419	-1.48634
	-2.56728	-1.90733	-0.907538	-0.660749
	-1.50226	-2.25928	-2.55912	-0.532624
	-1.87794	-2.46726	-2.91184	-1.1834
	-0.825166	-0.956933	-2.38178	-1.18879
	-2.74634	-0.206013	-1.85099	-1.54615
	-3.14679	-0.461228	-1.47821	-1.20954
	-0.976229	-0.145955	-2.14553	-0.141414
	-1.86169	-1.33283	-0.884513	-0.807057
	-2.24697	-1.06984	-1.70118	-0.200792
	-2.97187	-0.881662	-1.68534	-0.422259
	-3.04605	-0.725304	-0.76799	-0.740557
	-0.833858	-1.20385	-0.758768	-0.560803
	-3.29558	-0.234255	-1.43753	-1.57686
	-0.7515	-0.575192	-1.19919	-1.28035
	-0.723789	-0.990932	-1.08208	-2.01571
	-1.56984	-0.652494	-1.39655	-3.29385
	-0.348722	-2.67177	-1.23255	-0.749945
	-1.21902	-2.79917	-1.61602	-1.66974
	-0.324216	-2.15664	-2.32866	-1.1894
	-1.47853	-0.878527	-2.41367	-1.26936
	-0.77244	-2.98382	-2.35725	-1.34052
	-1.08435	-2.82336	-0.862517	-0.238087
	-0.940385	-0.470234	-2.06254	-0.0823678
	-0.4794	-2.54338	-3.32736	-0.765749
	-2.01746	-0.709829	-1.23303	-0.55929
	-1.01095	-0.606727	-1.02192	-0.274359
	-2.22853	-0.903026	-0.36762	-0.837251
	-0.897519	-1.14237	-1.79549	-0.876216
	-0.470553	-1.23124	-0.849335	-1.38638
	-0.685493	-1.61914	-1.13433	-0.426411
	-0.663315	-1.00709	-2.59459	-1.1007
	-0.521739	-1.02905	-1.01003	-0.821152
	-1.45411	-0.712473	-0.112857	-0.345591
	-1.87005	-0.814728	-0.417779	-0.703749
	-0.508803	-1.07451	-0.758368	-1.41175
	-3.88547	-0.399421	-0.436655	-0.806009
	-1.64565	-0.220014	-0.21671	-0.806243
	-2.24343	-0.410564	-2.34143	-0.422939
	-0.779521	-1.12009	-1.50851	-0.41452
	-0.677294	-0.374832	-0.262776	-0.51614
	-1.93523	-1.26731	-0.216677	-1.84086
	-0.292633	-0.733371	-2.43603	-1.92673
	-1.9886	-1.11615	-0.840195	-0.772115
	-1.89294	-0.454884	-2.15228	-0.889876
	-1.84749	-0.752773	-1.06316	-1.65385
	-0.4711	-0.925814	-0.334431	-0.544195
	-0.636243	-1.60122	-2.17849	-0.940843
	-0.443319	-1.1641	-1.91485	-0.996641
	-0.385963	-1.4044	-1.86731	-0.854513
	-1.10087	-0.358852	-1.73971	-0.386733
	-1.36601	-0.514707	-0.487146	-0.330064
	-0.437063	-0.975202	-3.72788	-1.46716
	-1.53189	-0.588088	-2.0567	-1.96685
	-1.51384	-0.696937	-1.84722	-0.110266
	-2.08771	-0.864159	-1.52385	-1.03027
	-0.664859	-0.85901	-1.20911	-0.140464
	-0.16951	-0.448757	-1.36109	-0.564763
	-0.799384	-0.645185	-1.97885	-0.701272
	-0.956061	-0.189592	-1.65823	-0.849922
	-1.13119	-0.817507	-3.15524	-2.16024
	-1.99362	-0.549744	-1.29031	-1.03028
	-1.62413	-0.809929	-1.94085	-0.735553
	-0.869847	-1.66742	-0.782955	-1.08794
	-1.14662	-0.544474	-2.21096	-0.284828
	-0.48517	-0.588294	-2.32896	-0.537427
	-2.66642	-1.83431	-0.746149	-0.426216
	-1.35043	-0.829171	-1.37115	-1.18426
	-0.232131	-0.813445	-2.58349	-0.197955
	-0.874655	-1.42795	-1.69843	-1.4276
	-0.618063	-0.823846	-1.75041	-1.34476
	-0.916939	-1.51367	-1.86442	-0.974863
	-1.39554	-0.274104	-0.695928	-0.848798
	-0.732601	-1.1008	-0.665368	-1.11369
	-0.427564	-1.33717	-0.770768	-1.90677
	-0.955769	-1.58638	-1.91453	-1.06916
	-0.501221	-0.970808	-0.524654	-0.584572
	-0.98698	-1.26746	-1.30927	-2.27196
	-1.36409	-0.7578	-1.40389	-0.102848
	-1.35756	-0.462951	-1.74279	-0.207011
	-0.666201	-1.47943	-1.37162	-0.216457
	-0.566065	-1.04817	-1.10969	-2.50803
	-1.52626	-0.588339	-2.59319	-1.02948
	-1.65509	-0.56767	-1.05609	-0.848456
	-1.53228	-0.526644	-1.4916	-0.572265
	-2.44212	-0.0935362	-1.91713	-2.9011
	-1.18031	-0.533524	-1.44574	-1.55769
	-1.78718	-0.194389	-2.09221	-0.133067
	-0.928495	-0.714234	-1.01407	-3.53187
	-0.924097	-1.40299	-0.231561	-0.720245
	-0.68905	-1.16252	-0.511787	-2.88423
	-0.532781	-1.70721	-0.0791846	-0.63326
	-1.56505	-0.343046	-1.73407	-0.550316
	-1.35103	-0.942611	-1.0916	-1.15434
	-1.03529	-0.320122	-2.01662	-1.33628
	-1.30695	-0.769532	-1.18937	-0.630635
	-1.99369	-1.07088	-1.91267	-0.338434
	-0.989235	-0.475557	-0.870562	-0.457814
	-1.23016	-1.60065	-0.590673	-0.312476
	-0.528985	-1.30949	-0.18766	-0.680462
	-0.577058	-1.06306	-0.630364	-2.07858
	-1.71282	-0.95836	-0.850746	-1.01691
	-1.26389	-1.14948	-1.98429	-0.588132
	-0.5692	-1.8035	-0.309963	-0.835337
	-3.65688	-1.4214	-2.6973	-1.2744
	-0.411805	-0.815343	-0.948	-0.815387
	-0.796635	-0.71948	-1.60049	-1.06291
	-0.916241	-0.417002	-0.616691	-0.297386
	-1.14326	-0.312454	-0.188085	-0.244834
	-0.505426	-0.523353	-2.96561	-2.83221
	-1.09479	-0.187951	-0.158284	-2.16103
	-1.18642	-0.644093	-3.18548	-1.92902
	-0.820449	-0.631889	-0.653595	-0.187272
	-0.918877	-0.584801	-2.4944	-0.512502
	-1.07526	-1.13985	-0.280507	-1.70325
	-1.04857	-1.0649	-1.05059	-0.451685
	-1.00099	-0.687119	-1.20075	-1.76684
	-0.609615	-0.397377	-1.04635	-0.827541
	-0.128751	-1.48218	-3.06355	-2.26831
	-0.986119	-0.802146	-1.69489	-0.690472
	-1.45274	-1.01921	-3.29633	-1.80224
	-0.834836	-1.03126	-3.2688	-0.801026
	-2.15932	-0.421235	-3.34308	-1.45654
	-1.34192	-1.00579	-1.89044	-1.72887
	-0.939611	-1.41803	-0.313166	-1.52245
	-2.02993	-0.473167	-3.08585	-1.91003
	-2.6643	-0.541474	-1.86244	-1.37059
	-0.181743	-1.02401	-4.05024	-1.48216
	-1.32552	-1.24427	-0.818714	-1.41212
	-0.351918	-0.55161	-2.17158	-2.13277
	-0.811943	-1.0141	-2.13077	-0.320482
	-1.78165	-0.619807	-2.02704	-1.62167
	-1.39052	-0.536204	-2.88895	-0.110035
	-1.8585	-0.905833	-0.747049	-0.834925
	-0.835768	-0.317837	-0.226643	-2.10248
	-0.553472	-0.499059	-0.305631	-0.548962
	-0.834871	-0.945665	-3.58462	-0.599739
	-0.688588	-1.06751	-0.84606	-0.64155
	-0.875641	-0.275149	-0.735537	-1.23917
	-0.598303	-0.913619	-1.99896	-0.420496
	-0.761488	-1.5878	-2.23784	-0.296632
	-1.07633	-0.512591	-0.833681	-1.07698
	-1.1934	-0.111257	-2.08632	-0.738306
	-0.505834	-0.114951	-1.22674	-0.306127
	-1.11691	-0.467681	-0.885324	-2.05894
	-0.551115	-0.593644	-2.67024	-2.62692
	-0.319744	-0.197983	-1.0491	-1.6434
	-1.1531	-0.45812	-0.356119	-3.17077
	-1.02817	-0.775865	-0.866722	-0.948178
	-0.730263	-0.251653	-0.444797	-0.811441
	-0.227715	-1.42228	-0.59226	-1.45947
	-0.745622	-0.342801	-0.399546	-0.380144
	-1.71305	-1.00019	-0.450771	-0.655535
	-2.56958	-0.462348	-0.430795	-1.23847
	-3.08097	-2.35188	-2.74371	-0.162485
	-2.79734	-1.66861	-1.05936	-0.479488
	-3.17312	-0.229679	-0.344932	-0.228419
	-3.24399	-0.507381	-0.534212	-1.51635
	-1.73568	-1.01256	-0.500961	-2.81752
	-2.44795	-0.14041	-0.800256	-0.782557
	-2.49785	-0.335809	-0.428966	-2.78799
	-2.86351	-0.991097	-0.733645	-1.74127
	-0.412872	-0.256822	-4.68723	-0.292696
	-3.10396	-0.231663	-2.80788	-1.0831
	-1.7075	-0.639965	-2.05579	-2.72791
	-1.12896	-1.73175	-0.364243	-1.95773
	-0.269794	-1.00112	-1.64192	-0.924268
	-2.83115	-0.407853	-1.20888	-0.237314
	-0.295148	-0.516432	-3.0643	-0.721457
	-2.19194	-0.343247	-1.38015	-0.462322
	-0.0858974	-2.17521	-1.40289	-0.120757
	-1.50016	-0.930885	-0.827056	-1.18636
	-2.26726	-0.705763	-1.70834	-2.16366
	-0.854553	-0.568468	-1.14209	-0.323825
	-1.62308	-0.539063	-1.47447	-2.38646
	-0.674279	-0.204847	-0.250709	-0.714286
	-1.02751	-0.522313	-3.33564	-1.26241
	-1.93422	-0.574126	-2.08846	-0.383955
	-1.16154	-0.459059	-0.812689	-1.57124
	-0.314211	-0.341412	-1.37554	-1.30148
	-0.324825	-0.621429	-3.20644	-0.316454
	-2.39162	-1.71586	-0.723502	-0.51535
	-2.90465	-0.797666	-1.72161	-1.52702
	-0.942754	-0.575173	-2.23241	-0.303359
	-0.749301	-0.653663	-1.90566	-0.940054
	-0.662759	-0.935956	-2.13442	-0.730783
	-0.628858	-0.952939	-2.22201	-0.151896
	-0.891038	-1.33146	-0.660603	-1.24658
	-0.407908	-1.26788	-0.568047	-0.575775
	-2.43846	-0.734041	-0.467541	-0.344267
	-0.77987	-0.678917	-0.271852	-0.294103
	-2.05962	-1.60801	-0.850087	-1.72767
	-0.694544	-0.770191	-0.74546	-1.46366
	-2.05966	-1.42419	-0.805017	-0.876912
	-1.29527	-0.370807	-0.242177	-1.47132
	-2.67115	-1.16474	-1.66538	-0.196669
	-1.58649	-1.24262	-0.334534	-1.37327
	-0.514814	-1.64821	-0.62978	-1.2695
	-0.272706	-0.719956	-1.28429	-0.938705
	-0.478488	-1.13984	-0.47623	-1.23593
	-1.59671	-1.35225	-0.952005	-1.14127
	-1.53198	-0.269125	-0.741823	-0.5348
	-1.43006	-0.437808	-0.592391	-0.972594
	-0.518066	-1.11108	-0.394773	-0.17206
	-1.74518	-0.38052	-0.2534	-1.38398
	-0.665672	-1.72812	-0.527225	-1.7501
	-0.567718	-0.784083	-0.379773	-1.54164
	-0.117165	-2.99077	-0.923438	-0.600888
	-0.733883	-0.753624	-0.325895	-0.0885407
	-0.726796	-1.66686	-1.1295	-1.4179
	-1.04692	-1.80809	-1.58612	-0.689353
	-3.81773	-1.85772	-3.88558	-2.62984
	-1.02431	-1.2675	-0.809231	-0.396602
	-0.441764	-1.17863	-0.177639	-0.537042
	-2.99856	-1.42504	-0.751708	-1.17405
	-1.37899	-1.05192	-2.0468	-0.287695
	-0.148205	-0.506628	-1.42494	-1.27824
	-1.00682	-2.26966	-1.62316	-1.71201
	-1.35198	-2.22745	-1.27255	-1.00281
	-1.97051	-1.46293	-2.4948	-1.3528
	-1.9237	-0.640318	-1.0556	-0.998481
	-0.746216	-0.967172	-0.861151	-0.817363
	-1.41592	-1.55933	-2.61251	-0.421349
	-1.08417	-0.995102	-1.10004	-1.19043
	-2.87901	-0.812736	-0.185236	-0.633763
	-1.94798	-0.964305	-1.9991	-0.710085
	-1.96276	-1.49586	-2.9597	-0.285255
	-3.22141	-1.06958	-1.12361	-0.598042
	-0.895121	-0.842622	-4.47862	-0.685256
	-2.57025	-0.595228	-1.48151	-1.42509
	-0.752157	-0.576641	-2.38813	-2.34945
	-0.91092	-0.515127	-1.95495	-0.97476
	-1.56123	-0.68718	-0.710997	-1.4094
	-2.65569	-2.85658	-0.367857	-1.64278
	-2.96161	-1.25465	-0.68109	-2.58874
	-0.249218	-0.770669	-0.47902	-2.96731
	-0.895659	-3.09231	-1.96933	-0.41032
	-1.9891	-0.230143	-1.82301	-2.46169
	-2.56364	-0.440931	-2.40834	-1.55249
	-0.516405	-0.453696	-1.22403	-0.928022
	-1.19123	-0.733583	-0.178167	-1.85397
	-0.340834	-0.412198	-0.685908	-1.97226
	-0.371847	-0.666156	-1.18352	-0.165272
	-0.573791	-0.795495	-2.39612	-2.97493
	-0.966042	-1.30162	-1.74012	-3.39553
	-1.09592	-0.369113	-1.65099	-2.71179
	-1.12728	-0.903942	-0.133311	-0.752004
	-0.756435	-0.821669	-1.08335	-0.559786
	-0.380041	-0.549281	-3.95385	-0.917335
	-0.576283	-0.95215	-2.175	-1.07462
	-1.7036	-0.73435	-0.55552	-0.354481
	-1.03049	-0.339687	-1.6475	-2.15779
	-0.70088	-0.477871	-1.66498	-0.57282
	-1.28493	-0.562044	-2.02809	-0.476329
	-0.961953	-0.98569	-1.87017	-1.27617
	-2.09458	-1.00423	-1.55459	-0.328052
	-1.37096	-1.08892	-1.50598	-0.933634
	-0.54221	-1.08972	-0.830522	-0.701901
	-1.83259	-0.596391	-0.246702	-0.616931
	-0.550711	-1.84052	-1.62061	-0.802457
	-0.976616	-0.528835	-1.33795	-1.71966
	-1.86033	-1.83625	-0.51478	-0.139427
	-0.995415	-1.87395	-1.93767	-1.2518
	-0.92574	-1.10226	-0.84557	-0.298171
	-0.937082	-1.08264	-1.16366	-0.56854
	-0.433556	-0.563817	-2.40192	-0.343498
	-1.13354	-0.602437	-2.05873	-2.19638
	-0.82409	-1.57755	-1.3002	-0.619905
	-0.881684	-0.900256	-1.3406	-2.73428
	-1.92087	-0.556176	-0.736329	-1.57201
	-2.18823	-1.52411	-0.673659	-0.540725
	-3.66442	-0.306349	-1.14334	-1.07696
	-0.629876	-1.34655	-0.837596	-2.81795
	-0.255534	-0.148321	-1.57063	-2.60895
	-0.441511	-0.205539	-1.95471	-0.793582
	-1.77321		-0.64332	-2.42846
	-0.404492		-1.88615	-0.363093
	-1.22362		-1.02833	-0.606549
	-0.150892		-1.70083	-0.284446
	-0.713237		-2.40702	-0.905593
	-1.05077		-1.46194	-0.617945
	-0.171731		-0.424179	-2.06
	-1.00792		-1.51747	-2.49372
	-1.16041		-1.30229	-0.411813
	-0.216162		-0.912205	-0.737321
	-1.60342		-0.601659	-1.69212
	-1.40456		-1.4965	-0.946677
	-0.858974		-1.30541	-1.09603
	-0.678138		-1.76254	-0.578651
	-0.797965		-1.80157	-0.0987421
	-1.06449		-0.335677	-1.93923
	-0.900567		-1.04922	-0.441925
	-1.0956		-0.212899	-2.27004
	-1.02075		-1.28154	-2.06048
	-1.11577		-0.140098	-0.451172
	-0.936717		-1.02764	-1.39422
	-1.07526		-1.9227	-2.43184
	-1.26012		-1.79519	-2.6998
	-1.88545		-2.75155	-1.13341
	-1.02209		-3.91661	-0.451568
	-1.03249		-0.27963	-2.51346
	-1.69157		-1.39547	-2.77194
	-0.0825142		-0.821828	-1.30495
	-0.456935		-0.234156	-0.795749
	-0.765735		-2.0515	-2.30071
	-0.813204		-0.914298	-2.07176
	-0.395899		-1.20418	-1.9574
	-0.48904		-0.839336	-1.09827
	-1.0661		-1.82549	-0.891634
	-1.33291		-2.2304	-0.425632
	-1.33293		-0.71181	-0.812692
	-0.439271		-1.74877	-1.96932
	-0.671542		-1.65686	-1.34702
	-0.828344		-1.08857	-1.67977
	-0.692544		-0.871425	-1.52311
	-1.06708		-0.655145	-1.05192
	-1.41779		-1.23098	-0.994412
	-1.44723		-1.25671	-0.784386
	-2.7013		-2.1321	-2.51713
	-0.284701		-1.28154	-0.598233
	-0.805126		-3.13277	-1.09945
	-1.69684		-1.08159	-1.65473
	-1.89087		-1.14014	-2.5939
	-1.84821		-0.831296	-1.89818
	-1.3001		-0.628748	-0.661595
	-1.01855		-0.881159	-2.64642
	-0.793501		-0.702708	-1.6594
	-2.7031		-1.03047	-0.791998
	-0.155294		-1.55698	-0.953555
	-1.17686		-0.397188	-0.860661
	-0.739923		-0.731892	-0.609876
	-0.792949		-0.419801	-0.682259
	-1.06893		-1.81648	-0.638562
	-0.995955		-1.41909	-1.71224
	-0.737384		-0.528773	-1.04678
	-0.686233		-0.147028	-1.08367
	-0.450622		-0.783445	-2.195
	-2.03299		-1.18569	-2.12419
	-3.7905		-1.08442	-0.729758
	-0.804924		-0.553341	-0.778279
	-0.249781		-1.84582	-0.86136
	-2.60791		-1.64062	-0.68666
	-2.18438		-0.404345	-1.28692
	-1.19564		-1.0107	-0.635204
	-2.18859		-1.10162	-0.358659
	-1.19174		-0.595951	-0.567706
	-2.72955		-0.548962	-0.297202
	-0.303715		-0.712709	-1.85914
	-1.23251		-1.57286	-1.29867
	-2.53997		-1.2861	-2.23309
	-0.516081		-2.31905	-0.565267
	-0.376575		-2.03832	-0.535722
	-1.51668		-0.583915	-0.493925
	-2.41596		-0.754487	-0.691349
	-0.978841		-1.2282	-1.15783
	-0.638108		-1.10221	-0.40281
	-0.599708		-0.769847	-1.10271
	-0.401087		-1.77244	-1.31869
	-1.2627		-1.40782	-1.95734
	-0.558538		-0.914744	-1.79368
	-1.83629		-1.475	-0.814336
	-1.58328		-0.696627	-0.796877
	-0.97359		-1.46745	-1.30028
	-3.76		-0.973279	-1.07187
	-1.00205		-0.373228	-1.62749
	-3.0256		-0.60798	-0.421195
	-1.11673		-0.580136	-2.55659
	-2.21578		-0.497056	-0.723079
	-0.642392		-0.273285	-0.947366
	-1.38654		-2.29549	-1.21098
	-1.23374		-0.797082	-1.88558
	-3.48506		-1.13363	-0.988853
	-0.900053		-0.450224	-0.835029
	-0.635668		-1.39423	-1.13828
	-0.922493		-2.0533	-2.34567
	-1.27733		-1.05371	-1.3274
	-0.270052		-0.943796	-1.53901
	-1.84417		-1.02734	-2.16367
	-1.66415		-1.25566	-0.90818
	-0.745046		-1.25564	-1.1655
	-0.2809		-0.907707	-0.98478
	-0.431649		-1.62362	-0.331131
	-0.544491		-1.91405	-2.07657
	-1.02392		-0.291476	-0.773635
	-0.614926		-0.475148	-0.3338
	-1.03815		-2.16221	-1.64127
	-0.146427		-2.27487	-0.973325
	-1.99413		-0.592832	-1.48933
	-0.833262		-1.63024	-1.3228
	-1.18984		-0.670348	-0.728361
	-0.839694		-1.64714	-0.422582
	-1.78163		-1.30349	-0.652959
	-2.24585		-0.44241	-0.742318
	-1.68523		-1.36058	-0.101674
	-0.794132		-0.814399	-0.867705
	-0.34672		-0.927904	-1.44396
	-0.911322		-0.705667	-1.64048
	-1.30119		-0.444374	-3.5449
	-1.03618		-1.58239	-0.290637
	-1.16979		-1.47946	-1.42847
	-1.57449		-0.660607	-2.37387
	-1.24043		-0.614925	-0.484225
	-2.2268		-1.37727	-0.256843
	-2.02552		-1.2309	-1.02541
	-1.99545		-0.76562	-1.61001
	-1.62316		-0.517851	-2.75717
	-1.33878		-1.86493	-1.62361
	-1.23784		-0.583955	-0.547403
	-0.51455		-1.69476	-0.933258
	-1.24344		-0.136914	-1.77113
	-1.01555		-1.43201	-1.81136
	-1.24822		-1.21504	-0.441187
	-0.96013		-1.53566	-0.142095
	-1.73171		-1.09231	-1.52672
	-0.918261		-3.0112	-0.181286
	-0.4659		-1.23703	-0.456711
	-1.52396		-0.0822772	-0.281349
	-0.12059		-0.55213	-0.281825
	-0.415683		-1.16665	-1.13592
	-0.489858		-0.164187	-1.51739
	-0.308179		-0.108821	-1.01212
	-2.07474		-0.661848	-0.8617
	-0.171289		-0.120965	-0.862101
	-2.20202		-1.49876	-1.09057
	-1.62779		-3.97009	-0.580095
	-2.18606		-3.8792	-0.216454
	-1.82552		-0.603785	-1.35824
	-1.0898		-1.54231	-0.672555
	-1.29544		-1.15522	-0.902159
	-1.1574		-1.10301	-1.81899
	-0.59929		-2.62202	-0.790177
	-0.890492		-0.59812	-1.19623
	-1.26807		-2.41243	-1.33032
	-0.680772		-2.25689	-0.8112
	-2.21746		-0.392407	-1.72011
	-0.947802		-0.299906	-1.85046
	-1.06528		-1.02746	-1.30621
	-1.72241		-0.828191	-0.226466
	-1.59401		-0.942521	-0.0995315
	-1.16271		-1.09245	-0.97719
	-0.301823		-1.17442	-2.30154
	-1.98312		-0.450945	-1.16285
	-2.67669		-0.323408	-3.43045
	-1.87112		-1.06314	-2.15975
	-0.100556		-0.356058	-0.668654
	-0.371929		-1.23308	-0.288415
	-0.368673		-0.476173	-0.729915
	-0.657213		-1.39151	-2.86957
	-1.51958		-1.37005	-0.995266
	-0.452985		-0.151526	-0.6862
	-1.49778		-1.31659	-0.436428
	-0.601754		-0.714827	-0.620252
	-0.408102		-0.467447	-0.426053
	-1.2835		-0.28182	-0.464469
	-1.12879		-0.836779	-0.487551
	-0.591683		-0.842617	-0.117987
	-0.730618		-0.547439	-0.873271
	-0.473351		-0.352523	-0.533361
	-0.434282		-0.289407	-1.14317
	-1.51734		-1.09116	-0.47384
	-0.724648		-0.895329	-1.86015
	-0.549477		-1.12458	-0.621553
			-0.385535	-1.18604
			-0.424993	-0.192758
			-3.37045	-1.60128
			-0.512821	-1.4529
			-1.17028	-0.338022
			-0.298975	-1.41879
			-0.562238	-2.45556
			-1.97184	-2.24325
			-1.2212	-2.6867
			-4.27972	-0.713194
			-1.88561	-0.583357
			-1.40982	-1.43458
			-0.210362	-2.18371
			-1.99391	-2.23243
			-2.17429	-1.87812
			-0.216215	-1.46118
			-0.665462	-1.72725
			-0.5681	-1.47144
			-0.238125	-0.256847
			-2.38245	-1.72895
			-0.190304	-0.53321
			-1.29611	-0.724461
			-1.299	-0.273768
			-1.35804	-0.53904
			-0.698762	-2.5386
			-1.02878	-0.904503
			-1.31119	-1.4207
			-0.663489	-1.02877
			-0.866375	-0.118238
			-3.12954	-0.256933
			-0.702793	-2.20107
			-0.825024	-0.809407
			-1.98297	-1.57076
			-0.0935051	-0.362173
			-0.290262	-0.237782
			-0.510949	-0.843386
			-0.897098	-0.57764
			-1.54121
			-1.30145
			-0.880714
			-1.44397
			-0.681859
			-2.06026
			-0.620242
			-2.05972
			-0.298903
			-1.15411
			-0.696776
			-0.462998
			-0.478471
			-1.81447
			-1.58766
			-1.57261
			-0.183526
			-1.57134
			-1.40201
			-1.19578
			-1.52321
			-1.76663
			-1.73498
			-2.81387
			-2.14565
			-2.99498
			-2.08371
			-0.838195
			-3.7844
			-2.583
			-1.02772
			-1.09465
			-2.33969
			-2.26955
			-1.77356
			-0.186733
			-0.907833
			-2.45769
			-0.769614
			-1.35225
			-2.53313
			-1.70637
			-0.697723
			-0.897293
			-2.81524
			-2.2591
			-1.41685
			-1.79393
			-0.279943
			-0.493713
			-3.27619
			-0.94754
			-1.09702
			-1.61588
			-1.53916
			-1.27722
			-2.29013
			-0.697743
			-0.880359
			-2.49054
			-1.21797
			-1.5182
			-0.926766
			-1.61319
			-0.187457
			-0.979328
			-0.449785
			-1.50311
			-0.703462
			-1.69501
			-1.21182
			-0.797545
			-2.46786
			-1.32805
			-0.0793021
			-0.317325
			-1.21291
			-1.75704
			-2.61238
			-1.7058
			-1.36144
			-2.36692
			-1.11228
			-1.17612
			-0.352617
			-1.51917
			-0.941843
			-1.75457
			-0.611226
			-1.17971
			-0.582342
			-1.2347
			-1.50478
			-2.18449
			-1.52726
			-1.41662
			-2.36827
			-0.425901
			-0.685517
			-1.30502
			-1.01888
			-2.46454
			-2.31299
			-0.732562
			-1.52087
			-1.90648
			-1.91484
			-1.05569
			-1.86123
			-0.752514
			-0.800665
			-1.37254
			-0.695126
			-0.786455
			-0.93113
			-0.398915
			-1.14784
			-0.419889
			-0.34316
			-0.484988
			-0.712327
			-1.65855
			-1.27043
			-2.55
			-2.11115
			-1.36016
			-1.00717
			-0.961829
			-0.0887931
			-0.291896
			-2.4137
			-2.78058
			-2.06032
			-1.12828
			-0.337796
			-1.67714
			-1.32522
			-1.09655
			-0.500988
			-2.01728
			-1.03901
			-0.323851
			-0.288005
			-0.326923
			-1.52302
			-2.73127
			-0.348053
			-2.02067
			-0.160107
			-0.6391
			-0.240096
			-0.513772
			-0.786981
			-1.42042
			-1.06111
			-0.631857
			-0.952153
			-0.942259
			-1.15247
			-0.690509
			-2.14215
			-0.692381
			-2.0565
			-1.77281
			-2.46721
			-1.39688
			-0.296073
			-2.59915
			-0.416999
			-1.79526
			-1.01807
			-1.70939
			-2.3356
			-2.61848
			-1.59623
			-0.973656
			-1.01166
			-2.57064
			-1.82339
			-0.745087
			-0.725716
			-1.36685
			-1.33083
			-1.18315
			-0.241732
			-1.58068
			-0.930976
			-0.950446
			-3.025
			-3.20235
			-0.327916
			-0.824354
			-1.14192
			-2.05868
			-1.71628
			-0.834982
			-1.86951
			-1.40615
			-0.94634
			-2.09087
			-1.30315
			-1.77963
			-1.47775
			-0.360649
			-1.36239
			-2.50474
			-0.523709
			-2.57329
			-1.39928
			-2.6004
			-1.28247
			-3.137
			-0.765561
			-1.67994
			-1.65594
			-2.21887
			-0.889571
			-1.3553
			-2.13718
			-2.64602
			-0.8587
			-1.225
			-0.324829
			-1.19309
			-1.28268
			-1.04925
			-2.1867
			-2.00085
			-0.579327
			-1.74395
			-0.919574
			-3.39953
			-1.11329
			-0.891013
			-0.558764
			-1.67794
			-0.583304
			-2.44603
			-1.09828
			-2.64078
			-0.875385
			-1.26883
			-0.793005
			-0.82803
			-2.18494
			-0.987566
			-1.1187
			-1.27432
			-1.10216
			-1.40338
			-1.41197
			-1.59095
			-1.84435
			-2.35041
			-1.11558
			-1.99977
			-2.54514
			-1.64789
			-1.26791
			-0.191499
			-1.33707
			-0.646687
			-0.638522
			-0.880738
			-0.30117
			-2.4475
			-0.779182
			-1.43479
			-0.93291
			-1.53735
			-2.3755
			-1.78151
			-0.605873
			-1.30108
			-1.59073
			-0.967719
			-1.04407
			-1.40673
			-2.22531
			-2.0968
			-1.96603
			-1.50008
			-0.692826
			-2.24772
			-1.20395
			-1.10389
			-0.450389
			-0.773036
			-0.348208
			-0.222302
			-0.445164
			-2.50198
			-0.858547
			-2.41412
			-2.10251
			-0.650658
			-0.801282
			-2.27361
			-2.62238
			-0.371155
			-3.14494
			-1.83377
			-2.84012
			-3.54858
			-1.95082
			-1.80288
			-2.50836
			-2.56233
			-0.752853
			-0.901668
			-0.990622
			-2.36949
			-1.18671
			-0.141279
			-0.653315
			-1.48542
			-1.42526
			-1.39817
			-1.62662
			-0.171263
			-1.37363
			-1.09765
			-0.492884
			-0.786966
			-0.525602
			-0.956263
			-1.99392
			-1.1359
			-0.600962
			-0.463191
			-1.30386
			-0.297884
			-0.810025
			-2.20853
			-1.65115
			-0.584936
			-2.06372
			-1.73284
			-1.80657
			-2.54135
			-1.82292
			-1.48562
			-0.839777
			-1.45756
			-0.111707
			-1.3917
			-0.197591
			-2.84755
			-0.983718
			-2.77622
			-1.94335
			-1.33738
			-2.28754
			-1.18702
			-1.00067
			-1.11661
			-0.415081
			-0.229244
			-2.02063
			-0.201754
			-1.89661
			-1.61514
			-1.21063
			-0.239058
			-0.856334
			-0.335789
			-0.92604
			-1.35577
			-0.513188
			-0.890171
			-0.819619
			-0.956346
			-0.879272
			-1.61118
			-0.19495
			-0.724941
			-0.802962
			-0.137234
			-0.404131
			-0.872658
			-1.01533
			-1.18644
			-1.38638
			-0.730133
			-1.33462
			-1.19542
			-1.02909
			-1.92477
			-1.84419
			-1.0974
			-2.01695
			-1.38048
			-1.93588
			-1.87404
			-0.812794
			-1.59004
			-0.720192
			-4.0174
			-1.48798
			-2.30586
			-0.234615
			-2.11079
			-0.449868
			-1.30571
			-0.377256
			-0.38654
			-0.913513
			-2.606
			-0.216058
			-1.16817
			-1.18876
			-1.49119
			-1.6821
			-1.38208
			-0.305714
			-0.297798
			-0.575511
			-1.48648
			-0.817493
			-0.60015
			-0.699762
			-0.0820451
			-0.440067
			-0.711538
			-1.35603
			-0.957488
			-2.468
			-0.740385
			-1.55625
			-0.181827
			-1.15867
			-0.404612
			-0.159457
			-0.236723
			-1.14767
			-1.51411
			-1.78292
			-0.444452
			-1.09707
			-2.67128
			-3.17368
			-2.19552
			-0.195896
			-1.52196
			-0.945629
			-0.812059
			-0.343533
			-1.54314
			-0.223152
			-1.30981
			-1.66222
			-1.56754
			-1.90034
			-2.65831
			-0.516501
			-1.05679
			-1.34602
			-2.0773
			-1.16277
			-1.14079
			-0.756397
			-0.877355
			-3.68242
			-0.478605
			-1.72301
			-0.884951
			-0.714671
			-0.662825
			-1.25607
			-0.469722
			-0.206946
			-0.730613
			-0.957132
			-1.38765
			-0.420687
			-1.59546
			-0.948691
			-0.537658
			-0.939163
			-1.15009
			-0.881301
			-2.01073
			-1.29852
			-0.359001
			-0.503382
			-1.4355
			-1.22351
			-0.473337
			-1.01501
			-1.27635
			-2.27162
			-1.85277
			-0.681459
			-1.09933
			-0.749947
			-0.267433
			-1.12229
			-0.266046
			-1.49569
			-2.49201
			-0.298733
			-1.43986
			-0.747851
			-0.415275
			-1.80171
			-2.06154
			-0.599231
			-0.716444
			-1.30206
			-1.25055
			-1.37906
			-1.28506
			-0.541539
			-1.76139
			-1.48966
			-0.855931
			-0.614883
			-1.85543
			-2.79642
			-0.359694
			-1.12264
			-2.71841
			-0.592498
			-0.66177
			-0.633043
			-0.403477
			-1.42823
			-0.433049
			-2.04615
			-2.07587
			-2.22195
			-0.763112
			-1.35243
			-3.60217
			-2.34753
			-0.09338
			-0.112032
			-0.250469
			-0.991645
			-0.146136
			-0.306462
			-0.87283
			-1.16177
			-0.926484
			-0.891452
			-1.58798
			-1.07905
			-1.86282
			-0.772838
			-0.481986
			-1.30518
			-2.21035
			-1.34313
			-0.898574
			-1.47138
			-0.970244
			-0.892369
			-0.702642
			-2.29888
			-3.90337
			-0.596375
			-0.944918
			-0.832636
			-1.10401
			-1.12747
			-0.821382
			-1.21109
			-0.736334
			-3.55566
			-0.51231
			-0.541742
			-0.306976
			-0.708051
			-0.736904
			-1.31824
			-1.27105
			-0.774493
			-0.216166
			-1.35993
			-0.695028
			-1.47394
			-1.27318
			-1.34478
			-1.32657
			-0.749117
			-0.719891
			-1.48905
			-0.376869
			-1.6791
			-1.02935
			-1.13194
			-0.708031
			-1.27191
			-3.01019
			-1.03857
			-1.40563
			-2.14264
			-0.515636
			-1.3166
			-1.67431
			-1.81833
			-0.256538
			-3.03768
			-0.558806
			-0.458131
			-0.911122
			-2.34565
			-2.14559
			-0.184993
			-2.34262
			-0.134536
			-0.664819
			-1.19098
			-2.70385
			-2.29945
			-2.3253
			-0.93256
			-1.01062
			-0.340605
			-0.75603
			-0.820463
			-2.05836
			-1.81138
			-2.20973
			-2.74455
			-2.60731
			-2.43269
			-1.82635
			-2.46799
			-0.995529
			-1.67915
			-2.3834
			-1.21665
			-1.32961
			-1.28649
			-1.39423
			-0.545381
			-3.04646
			-0.690832
			-0.492631
			-1.71435
			-0.219737
			-3.64532
			-0.411113
			-0.342961
			-0.553416
			-3.08891
			-0.75762
			-0.204074
			-1.44144
			-0.9354
			-3.1663
			-0.212203
			-2.41243
			-2.46265
			-0.918132
			-2.21321
			-2.47399
			-3.36559
			-0.291364
			-1.7451
			-1.09314
