# Supplementary material for: Huntingtin recruits KIF1A to transport synaptic vesicle precursors along the mouse axon to support synaptic transmission and motor skill learning
Source: eLife. 2023 Jul 11;12:e81011. doi: 10.7554/eLife.81011 (PMC10365837; doi:10.7554/eLife.81011)
Supplement: Figure 6—source data 3. [file elife-81011-fig6-data3.xlsx]

## Sheet: Figure 6b-Net Flux
	Wild-type/sh-Scr	Wild-type/sh-KIF1A	HTT-SD/sh-Scr	HTT-SD/sh-KIF1A
	4.03254	5.72698	-25.8914	1.04
	13.1156	0.00210073	1.50388	8.86
	20.3236	4.80443	-3.21154	12.91
	9.39055	3.94778	3.58757	-1.39
	-4.76489	-11.9367	9.26096	-2.72
	-14.0258	-23.53	-11.8658	12.24
	25.1082	0	-14.0044	-5.26
	13.5157	-18.61	8.76966	-7.79
	17.1873	10.79	-0.137808	-6.52
	-5.80725	9.51	-0.628415	9.69
	-0.312087	12.63	3.19179	5.68
	-15.2303	-17.26	2.6855	-0.37
	8.73	-17.31	-6.48183	9.69
	6.94	0	5.73211	1.38
	4.61	0	8.60904	3.25
	-3.63	-1.97	-13.6881	-5.18
	13.31	-13.64	21.3188	13.19
	8.2	6.53	-0.146372	-1.27
	-2.42	-4.1	-26.3521	5.01
	-1.52	2.98	6.97499	-0.43
	1.85	7.43	7.28312	5.01
	3.96	6.74	14.3484	-2.85
	2.95	-2.48	-6.83257	1.12
	2.52	-15.22	5.21035	5.93
	-1.34	-2.36	-10.2909	2.71
	-4.18	1.5	-9.4742	3.82
	-7.15	-2.77	2.16793	-4.98
	2.95	-0.95	4.43	2.65
	-2.21	-0.45	6.5	14.48
	-2.42	-2.37	-1.63	-1.03
	-1.64	0.79	-2.31	7.52
	1.95	-2.43	-19.97	18.03
	2.61	-8.45	-5.68	6.92
	7.77	0.07	4.06	-3.15
	-0.19	-0.4	6.32	-4.98
	15.5	-7.3	-3.78	0.35
	10.64	2.77	11.57	-3.35
	-12.09	8.88	2.45	12
	3.6	-2.36	-4.5	2.97
	1.38	0.07	-4.6	9.44
	1.74	1.2	-1.86	7.12
	-7.02	-1.95	13.52	5.73
	6.54	7.32	9.08	20.6
	-13.07	1.71	0.21	-5.66
	5.07	-0.84	7	11.23
	-1.71	12.24	-5.21	-1.33
	-1.51	-1.9	5.25	2.59
	-5.89	0.11	0.91	6.84
	-0.13	9.89	-0.86	4.12
	9.67	-3.05	-5.88	-18.88
	0.37	-3.08	2.54	5.81
	4.31	1.7	5	3.43
	-1.11	5.22	-9.08	-8.92
	3.7	-0.65	7.84	6.79
	-1.77	-2.25	6.5	-0.4
	0.03	-9.98	-4.39	5.36
	13.75	15.67	-1.75	0.2
	4.51	2.68	8.32	-5.97
	-5.16	-6.17	6.07	-3.43
	0.72		7.31	5.7
	-8.77		12.32	24.76
	-7.8		10.57	12.62
	-9.5		-8.62	20.03
	0.19		12.45	0.1
	1.68		12.67	-6.32
	4.57		7.01	12.78
	-2.44		19.25	2.3
	9.54		-2.85	9.49
	-1.71		6.56	4.65
	-10.62		3.73	-11.15
	5.28		-19.26	7.77
	-8.74		8.96	-6.59
	-3.95		10.35	-0.7
	8.16		4.24	7.26
	4.75		-0.48	0
	-7.6		-4.41	22.47
	-1.62		-1.53	3.74
	6.38		-0.81	-1.53
	-6.82		4.7	0.07
			-11.45	4.2
			14.6	0.04
			0.02	-5.97
			3.73	0
			2.62	-4.52
			5.57	6.74
			8.15	2.18
			4.6	7.56
			-8.01	0.65
			20.66	-1.71
			2.16
			16.38
			10.36
			12.37
			0.03
			1.03
			3.63
			2.36
			6.89
			10.08
			-5
			16.43
			3.17
			0.48
			10.35
			1.61
			-8.02
			9.04
			14.16
			-5.42
			-2.72
			8.9
			0.78
