# Supplementary material for: Huntingtin recruits KIF1A to transport synaptic vesicle precursors along the mouse axon to support synaptic transmission and motor skill learning
Source: eLife. 2023 Jul 11;12:e81011. doi: 10.7554/eLife.81011 (PMC10365837; doi:10.7554/eLife.81011)
Supplement: Figure 7—source data 1. [file elife-81011-fig7-data1.xlsx]

## Sheet: Figure 7c-Numb synap veiscles
	Wild-type/sh-Scr	Wild-type/sh-KIF1A	HTT-SD/sh-Scr	HTT-SD/sh-KIF1A
	18	29	11	25
	12	22	18	14
	6	25	53	13
	23	25	15	3
	10	3	34	3
	52	6	28	9
	21	5	15	47
	26	41	70	17
	19	20	65	18
	41	16	26	31
	20	17	7	13
	9	6	20	22
	13	6	60	18
	19	7	6	31
	29	39	3	15
	12	33	12	6
	24	11	45	8
	39	11	7	6
	22	12	6	11
	19	22	10	39
	10	19	38	5
	35	12	23	4
	18	8	28	12
	10	9	70	16
	13	12	14	43
	33	17	10	22
	50	6	10	32
	8	14	32	3
	3	5	3	3
	12	17	34	14
	7	18	17	13
	16	25	40	19
	50	11	35	33
	26	21	15	19
	11	23	15	8
	28	19	13	18
	40	7	18	8
	29	10	32	13
	12	9	15	18
	3	21	6	40
	11	35	11	25
	8	16	18	11
	16	21	17	25
	10	26	24	5
	19	10	17	34
	12	7	30	28
	10	11	33	24
	3	7	9	3
	15	8	11	5
	5	5	28	8
	4	17	11	6
	33	4	18	13
	7	9	11	5
	31	4	15	37
	19	6	14	53
	18	21	22	6
	26	18	22	21
	12	9	35	3
	16	24	21	15
	2	16	38	36
	38	38	27	7
	6	10	16	21
	21	31	7	16
	11	20	42	10
	27	9	72	3
	25	41	43	14
	23	11	9	6
	26	30	56	8
	17	41	12	7
	9	9	20	8
	27	23	22	7
	8	21	15	11
	8	12	20	10
	11	13	16	33
	10	4	3	10
	6	21	10	19
	5	10	35	4
	26	14	41	10
	13	23	33	7
	28	36	15	30
	5	31	10	5
	6	11	17	20
	45	22	12	16
	6	16	22	7
	5	5	34	25
	44	14	7	44
	14	23	54	28
	19	7	25	32
	29	6	44	8
	23	3	63	19
	20	23	36	27
	25	10	5	36
	17	23	48	24
	37	10	46	10
	16	9	43	7
	10	7	31	4
	24	5	24	19
	20	8	15	3
	26	20	10	19
	13	13	14	18
	13	20	20	3
	8	13	30	23
	8	12	31	48
	14	19	19	13
	18	39	6	4
	18	18	72	5
	15	18	9	34
	17	13	24	7
	27	5	10	14
	24	4	23	13
	8	19	12	16
	13	5	16	12
	9	42	33	25
	36	15	50	9
	9	5	10	2
	19	4	58	13
	15	5	39	12
	8	12	23	32
	25	11	32	53
	24	6	6	26
	12	8	37	51
	18	10	22	8
	11	28	71	9
	8	11	14	8
	7	25	8	3
	15	5	10	42
	7	4	4	6
	6	4	23	5
	5	8	44	9
	10	15	13	6
	14	17	25	55
	26	23	21	22
	10	12	48	15
	3	30	12	23
	13	18	32	21
	40	6	41	46
	8	23	9	46
	7	43	30	12
	4	8	10	10
	3	27	65	42
	19	15	19	10
	3	8	23	16
	43	12	17	15
	15	32	6	10
	6	8	14	35
	39	5	36	34
	9	9	10	16
	14	43	41	5
	43	26	9	30
	13	13	19	9
	13	13	69	22
	4	22	69	18
	6	21	11	35
	6	20	14	18
	16	11	9	14
	48	6	44	5
	19	13	16	15
	24	3	6	41
	6	16	7	17
	20	28	55	17
	29	8	3	46
	21	8	15	16
	18	14	59	30
	6	17	48	16
	11	10	13	31
	50	7	15	24
	41	8	12	6
	32	8	6	33
	18	3	22	21
	35	2	10	40
	20	7	9	9
	34	39	25	4
	15	6	8	17
	9	13	27	9
	8	17	22	13
	10	29	30	10
	34	10	4	37
	26	6	36	16
	34	11	63	41
	9	8	13	27
	23	21	17	7
	24	10	61	17
	4	12	19	23
	3	10	20	11
	9	4	39	24
	26	5	25	5
	10	12	58	10
	10	9	8	38
	4	4	24	14
	11	4	27	46
	3	3	42	4
	31	12	17	14
	8	5	32	14
	31	37	5	11
	20	35	13	5
	15	15	6	25
	7	15	32	15
	14	14	5	9
	23	6	6	6
	9	5	38	16
	16	15	53	16
	39	17	44	48
	20	10	45	36
	10	26	58	10
	9	37	16	9
	40	38	17	18
	4	9	12	52
	23	33	56	33
	41	37	24	16
	10	21	40	3
	40	11	19	17
	13	18	36	23
	22	34	6	10
	13	4	3	4
	31	4	12	11
	39	5	29	15
	53	3	50	23
	23	11	40	9
	23	27	4	24
	35	12	45	16
	9	5	60	3
	47	13	37	3
	9	5	23	44
	22	5	32	36
	30	36	17	20
	17	17	18	6
	49	16	29	3
	6	3	60	6
	25	7	21	11
	55	24	15	30
	43	11	6	12
	46	18	58	29
	53	10	23	5
	39	7	25	34
	6	21	17	10
	18	6	14	18
	30	6	5	12
	15	10	10	9
	10	9	21	43
	16	7	29	39
	9	14	3	39
	20	5	17	53
	11	23	19	35
	40	4	15	31
	39	3	11	7
	11	13	13	10
	12	7	11	13
	9	29	18	53
	15	8	10	18
	8	42	4	6
	4	44	11	5
	7	27	21	22
	10	10	40	13
	40	18	12	34
	3	13	40	20
	35	10	12	25
	8	7	28	21
	15	9	5	10
	6	14	5	53
	20	24	48	41
	12	23	28	15
	15	12	5	29
	5	7	28	13
	10	8	19	22
	4	8	8	3
	22	9	51	7
	4	23	4	34
	21	6	10	21
	29	38	8	59
	12	10	3	26
	18	33	7	46
	22	17	23	46
	6	14	3	47
	3	12	22	21
	20	16	5	54
	33	33	58	41
	19	3	21	31
	14	9	34	10
	7	16	52	14
	44	16	19	12
	9	10	4	54
	39	13	38	23
	52	37	59	10
	12	40	6	44
	10	4	36	3
	22	25	5	55
	43	24	22	9
	15	32	14	4
	14	10	35	18
	21	18	13	4
	6	29	51	16
	21	9	16	10
	15	6	24	12
	19	16	9	7
	15	15	3	3
	11	4	8	12
	39	4	8	5
	5	11	62	10
	3	20	34	3
	37	44	11	3
	28	6	47	3
	6	22	11	8
	20	6	70	4
	10	9	32	16
	33	9	65	6
	11	31	37	10
	3	4	45	29
	6	7	38	3
	12	11	9	34
	7	12	8	9
	16	3	46	22
	9	5	20	5
	6	27	65	36
	52	9	15	24
	3	9	67	27
	12	7	31	19
	30	27	12	16
	6	23	37	16
	8	17	48	46
	21	12	55	10
	13	45	16	20
	11	11	28	31
	47	7	10	24
	19	8	38	22
	10		43	33
	39		39	29
	11		10	5
	14		19	15
	12		8	5
	19		24	4
	13		30	19
	41		44	18
	10		29	16
	33		39	8
	17		30	33
	12		54	25
	21		14	4
	49		24
	9		40
	21		13
	25		30
	44		51
	22		21
	10		12
	16		62
	7		65
	18		30
	19		22
	13		9
	15		15
	19		12
	22		27
	16		14
	20		11
	11		13
	12		14
	14		3
	6		12
	10		3
	19		4
			13
			29
			3
			8
			25
			33
			5
			29
			20
			32
			29
			29
			26
			15
			3
			12
			6
			34
			4
			12
			20
			11
			22
			56
			15
			38
			3
			71
			5
			4
			14
			43
			55
			15
			48
			16
			15
			4
			64
			3
			6
			51
			52
			11
			27
			10
			18
			42
			9
			15
			3
			23
			10
			15
			26
			48
			9
