# Supplementary material for: Huntingtin recruits KIF1A to transport synaptic vesicle precursors along the mouse axon to support synaptic transmission and motor skill learning
Source: eLife. 2023 Jul 11;12:e81011. doi: 10.7554/eLife.81011 (PMC10365837; doi:10.7554/eLife.81011)
Supplement: Figure 8—source data 1. [file elife-81011-fig8-data1.xlsx]

## Sheet: Figure 8b-Rotarod 8days
Days of training	Wild-type/sh-Scr												Wild-type/sh-KIF1A											HTT-SD/sh-Scr										HTT-SD/sh-KIF1A
day 1	48.5	61.8	45.4	54	39.5	45.8	46.6	57.1	45.7	71	61.1	37.8	38.9	48.7	38.3	31.3	59.1	28.5	46.6	28.8	49.1	54.6	31.6	44	37.5	30.9	31	29.9	44.3	76.8	45.5	38.7	26.6	98.2	36.1	42	51	73.8	31.3	61.7	44.2	65.2	59.8	57.8	62.8
day 2	83.7	108.4	56.9	72.7	58.9	57.8	64.3	75.6	46.4	122.9	66.8	82.4	38.9	57.9	43.6	54.1	85.4	47.6	45	51.5	69.5	71.2	45.5	91.1	51.6	41.4	60	47.9	76.2	95.2	36.3	42.9	29.9	140.7	70.3	69	64.1	91.6	34.8	101.8	42.8	55.2	117.1	64.3	79.4
day 3	127	121.4	71.3	84.9	81.3	46.1	70.2	71	85.3	171	59.6	131.7	106.2	105	39.2	55.5	103.1	39.2	69.9	65.2	83.1	57.2	68.8	59	53.1	30.4	55.6	47.3	85.4	95	26.5	59.4	28.7	157	44.1	47.3	81.9	84.5	57	155.5	33.5	56	109.8	102.1	42.6
day 4	144.8	121.4	73.6	88.5	116.1	49	59.2	81.8	57.4	236	82.9	119.8	108.7	147.6	60	58.9	64.3	21.1	70.8	99.6	90	70.3	75.2	138.9	68	31.1	40.8	44.6	82.7	85	40.7	46	31.2	138.6	35.1	50	95.33	68.6	65.7	135.3	45.4	48.3	148.5	85.8	81.8
day 5	126.8	104.7	96.3	56.7	121.9	41.4	50	52.7	81.2	276.3	77.4	117.3	106.4	111.2	67.9	68	83	29.5	92.8	85.5	93.1	71.8	69.8	160.3	70.5	28.9	64.2	33.6	38.9	101.9	38.8	46.5	39.2	163.3	30.6	57.1	85.8	67.3	74.3	139.1	46	50	161.3	120	99.9
day 6	138.2	124.8	57.4	56.4	92.2	48.1	47.5	54	70.2	223.6	70	163.5	77.2	134.8	71.1	63.4	79.4	24	91.1	80.5	80.2	85	79.7	113.6	71.7	30.9	56.9	40.8	31.8	88.2	47.4	47.6	33.9	117.9	19.3	66.4	61.5	85.5	88.3	120.6	40.3	47.9	141	105.2	88
day 7	139.9	141.8	87.1	36.7	108.9	38	48.8	44.9	55.7	222.1	82.1	148	89.9	143.5	92.4	45.2	77.4	18.5	101.5	86.7	81.9	77.1	105.6	132.2	63.5	22.7	67.6	29.9	51.6	114.4	55	64.9	47	74.7	13.4	41.9	61.2	106	60.3	128.3	36.3	45.2	120.3	109.5	82.3
day 8	139.7	145.4	122.8	48.1	108.1	30	48	53.5	86.4	223.6	68.6	139.5	86.6	172.9	99.7	74.3	66.3	21.6	98.1	86.1	80.2	75.5	104.1	110.5	61.6	24.2	66	49.4	57.3	88.2	47.4	59.4	37.9	92.2	19.6	31.6	72.6	71.9	60.1	102.7	40.3	47.9	70.7	120.6	75.1
[truncated: 5 more columns]
