# Supplementary material for: Huntingtin recruits KIF1A to transport synaptic vesicle precursors along the mouse axon to support synaptic transmission and motor skill learning
Source: eLife. 2023 Jul 11;12:e81011. doi: 10.7554/eLife.81011 (PMC10365837; doi:10.7554/eLife.81011)
Supplement: Figure 8—source data 2. [file elife-81011-fig8-data2.xlsx]

## Sheet: Figure 8c-Day1
	Wild-type/sh-Scr	Wild-type/sh-KIF1A	HTT-SD/sh-Scr	HTT-SD/sh-KIF1A
	48.5	38.9	44	98.2
	61.8	48.7	37.5	36.1
	45.4	38.3	30.9	42
	54	31.3	31	51
	39.5	59.1	29.9	73.8
	45.8	28.5	44.3	31.3
	46.6	46.6	45.5	61.7
	57.1	28.8	38.7	44.2
	45.7	49.1	26.6	65.2
	71	54.6		59.8
	61.1	31.6		57.8
	37.8			62.8
