# Supplementary material for: Huntingtin recruits KIF1A to transport synaptic vesicle precursors along the mouse axon to support synaptic transmission and motor skill learning
Source: eLife journal article supplement (doi:10.7554/elife.81011), 2023-07-11

**A**

■ Untransfected    ■ sh-Scr    ■ sh-Kif1a

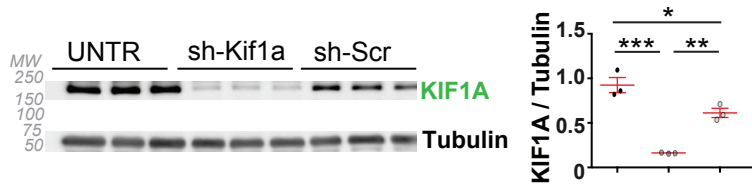

# B

## # vesicles

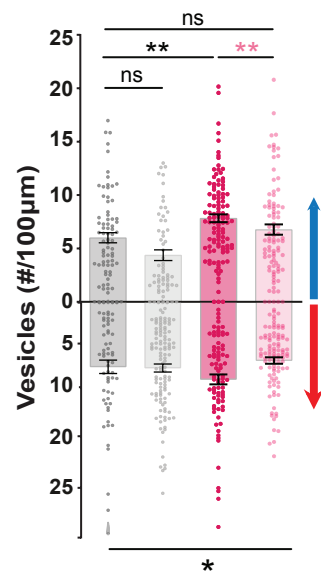

- Wild-type sh-Scr
- Wild-type sh-Kif1a
- HTT-SD sh-Scr
- HTT-SD sh-Kif1a

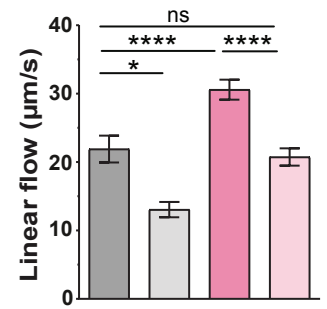

Supplement: supp [file elife-81011-supp-v1.zip]
