# Supplementary material for: Huntingtin recruits KIF1A to transport synaptic vesicle precursors along the mouse axon to support synaptic transmission and motor skill learning
Source: eLife journal article supplement (doi:10.7554/elife.81011), 2023-07-11

Figure 2-figure supplement 1

**A**

**Accelerating rotarod - 1st trial of Day 1**

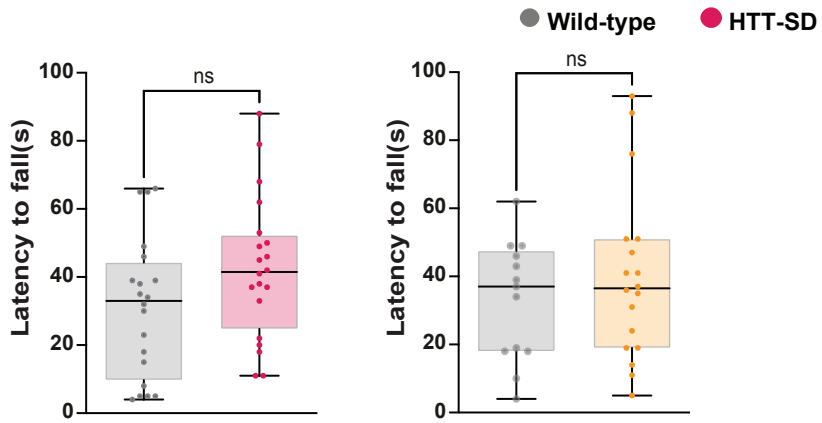

**B**

**Accelerating rotarod during Day 1 (18months)**

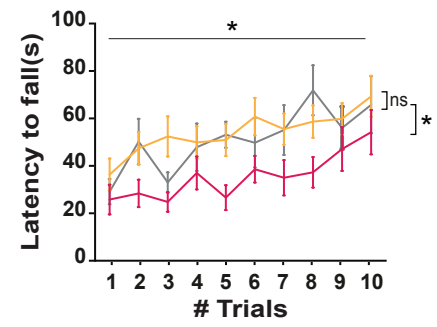

Supplement: supp [file elife-81011-supp-v1.zip]
