# Supplementary material for: Huntingtin recruits KIF1A to transport synaptic vesicle precursors along the mouse axon to support synaptic transmission and motor skill learning
Source: eLife journal article supplement (doi:10.7554/elife.81011), 2023-07-11

Figure 1-figure supplement 1

**A**

## Vamp-2-mCherry axonal transport

● Wild-type    ● HTT-SD    ● HTT-SA

**# vesicles (/100μm)**

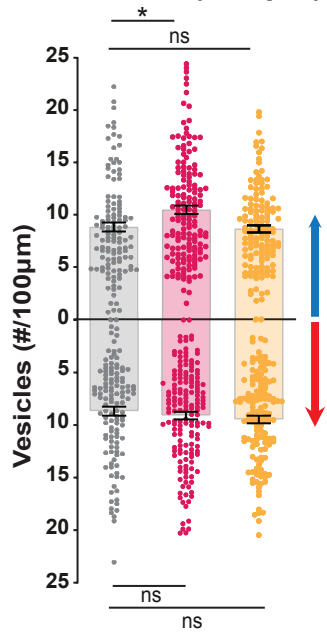

**Linear flow rate ( $\mu\text{m/s}$ )**

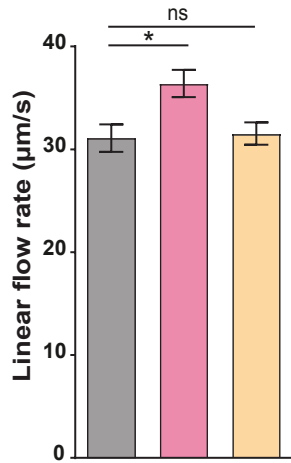

# B

## VGLUT1-pHluorin exocytosis

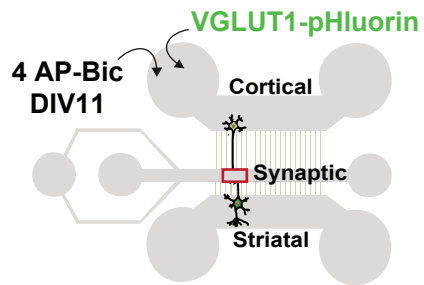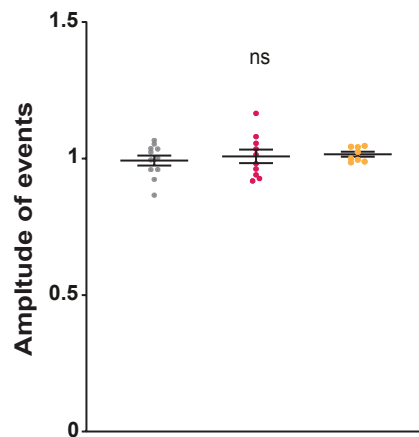

Supplement: supp [file elife-81011-supp-v1.zip]
