# Supplementary material for: Huntingtin recruits KIF1A to transport synaptic vesicle precursors along the mouse axon to support synaptic transmission and motor skill learning
Source: eLife journal article supplement (doi:10.7554/elife.81011), 2023-07-11

Figure 6-figure supplement 2

**A**

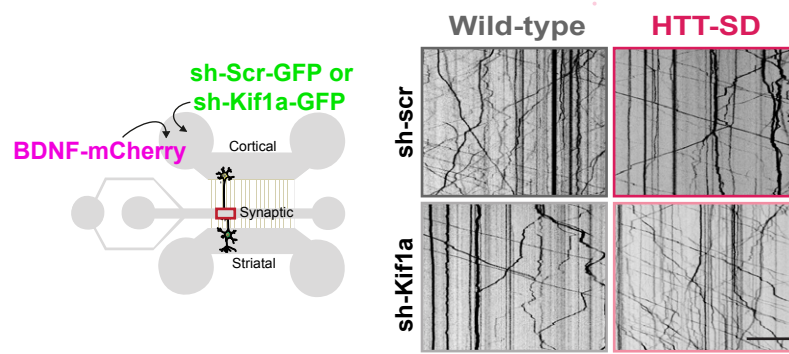

**B**

### BDNF-mCherry transport with KIF1A silencing

■ Wild-type sh-Scr    ■ Wild-type sh-Kif1a    ■ HTT-SD sh-Scr    ■ HTT-SD sh-Kif1a

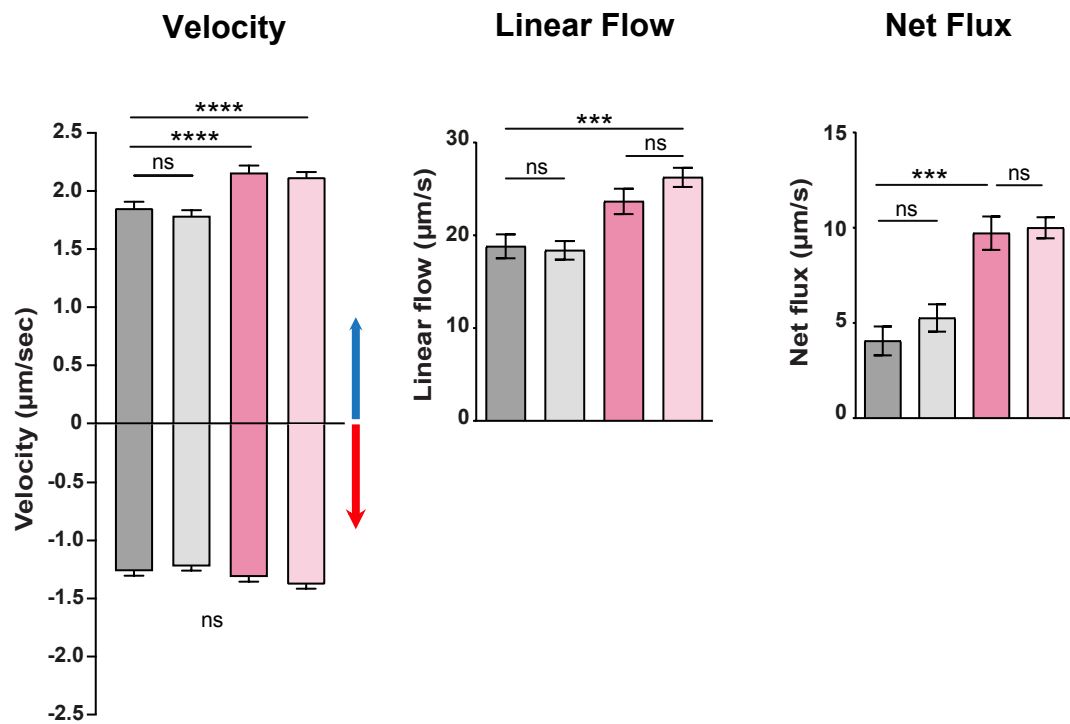

Supplement: supp [file elife-81011-supp-v1.zip]
