# Supplementary material for: Huntingtin recruits KIF1A to transport synaptic vesicle precursors along the mouse axon to support synaptic transmission and motor skill learning
Source: eLife journal article supplement (doi:10.7554/elife.81011), 2023-07-11
Supplement: supp [file elife_poa_e81011_Figure_6_figure_supplement_1_source_data_1.xlsx]

## Sheet: Figure S6a-KIF1A level cx neur
KIF1A/tubulin	untransfected	sh-KIF1A	sh-Scr
	0.820922	0.164885	0.711144
	1.09339	0.171367	0.534932
	0.858839	0.15414	0.590358
