# Supplementary figures and images for: Huntingtin recruits KIF1A to transport synaptic vesicle precursors along the mouse axon to support synaptic transmission and motor skill learning
Source: eLife journal article supplement (doi:10.7554/elife.81011), 2023-07-11

Figure 5-figure supplement 1

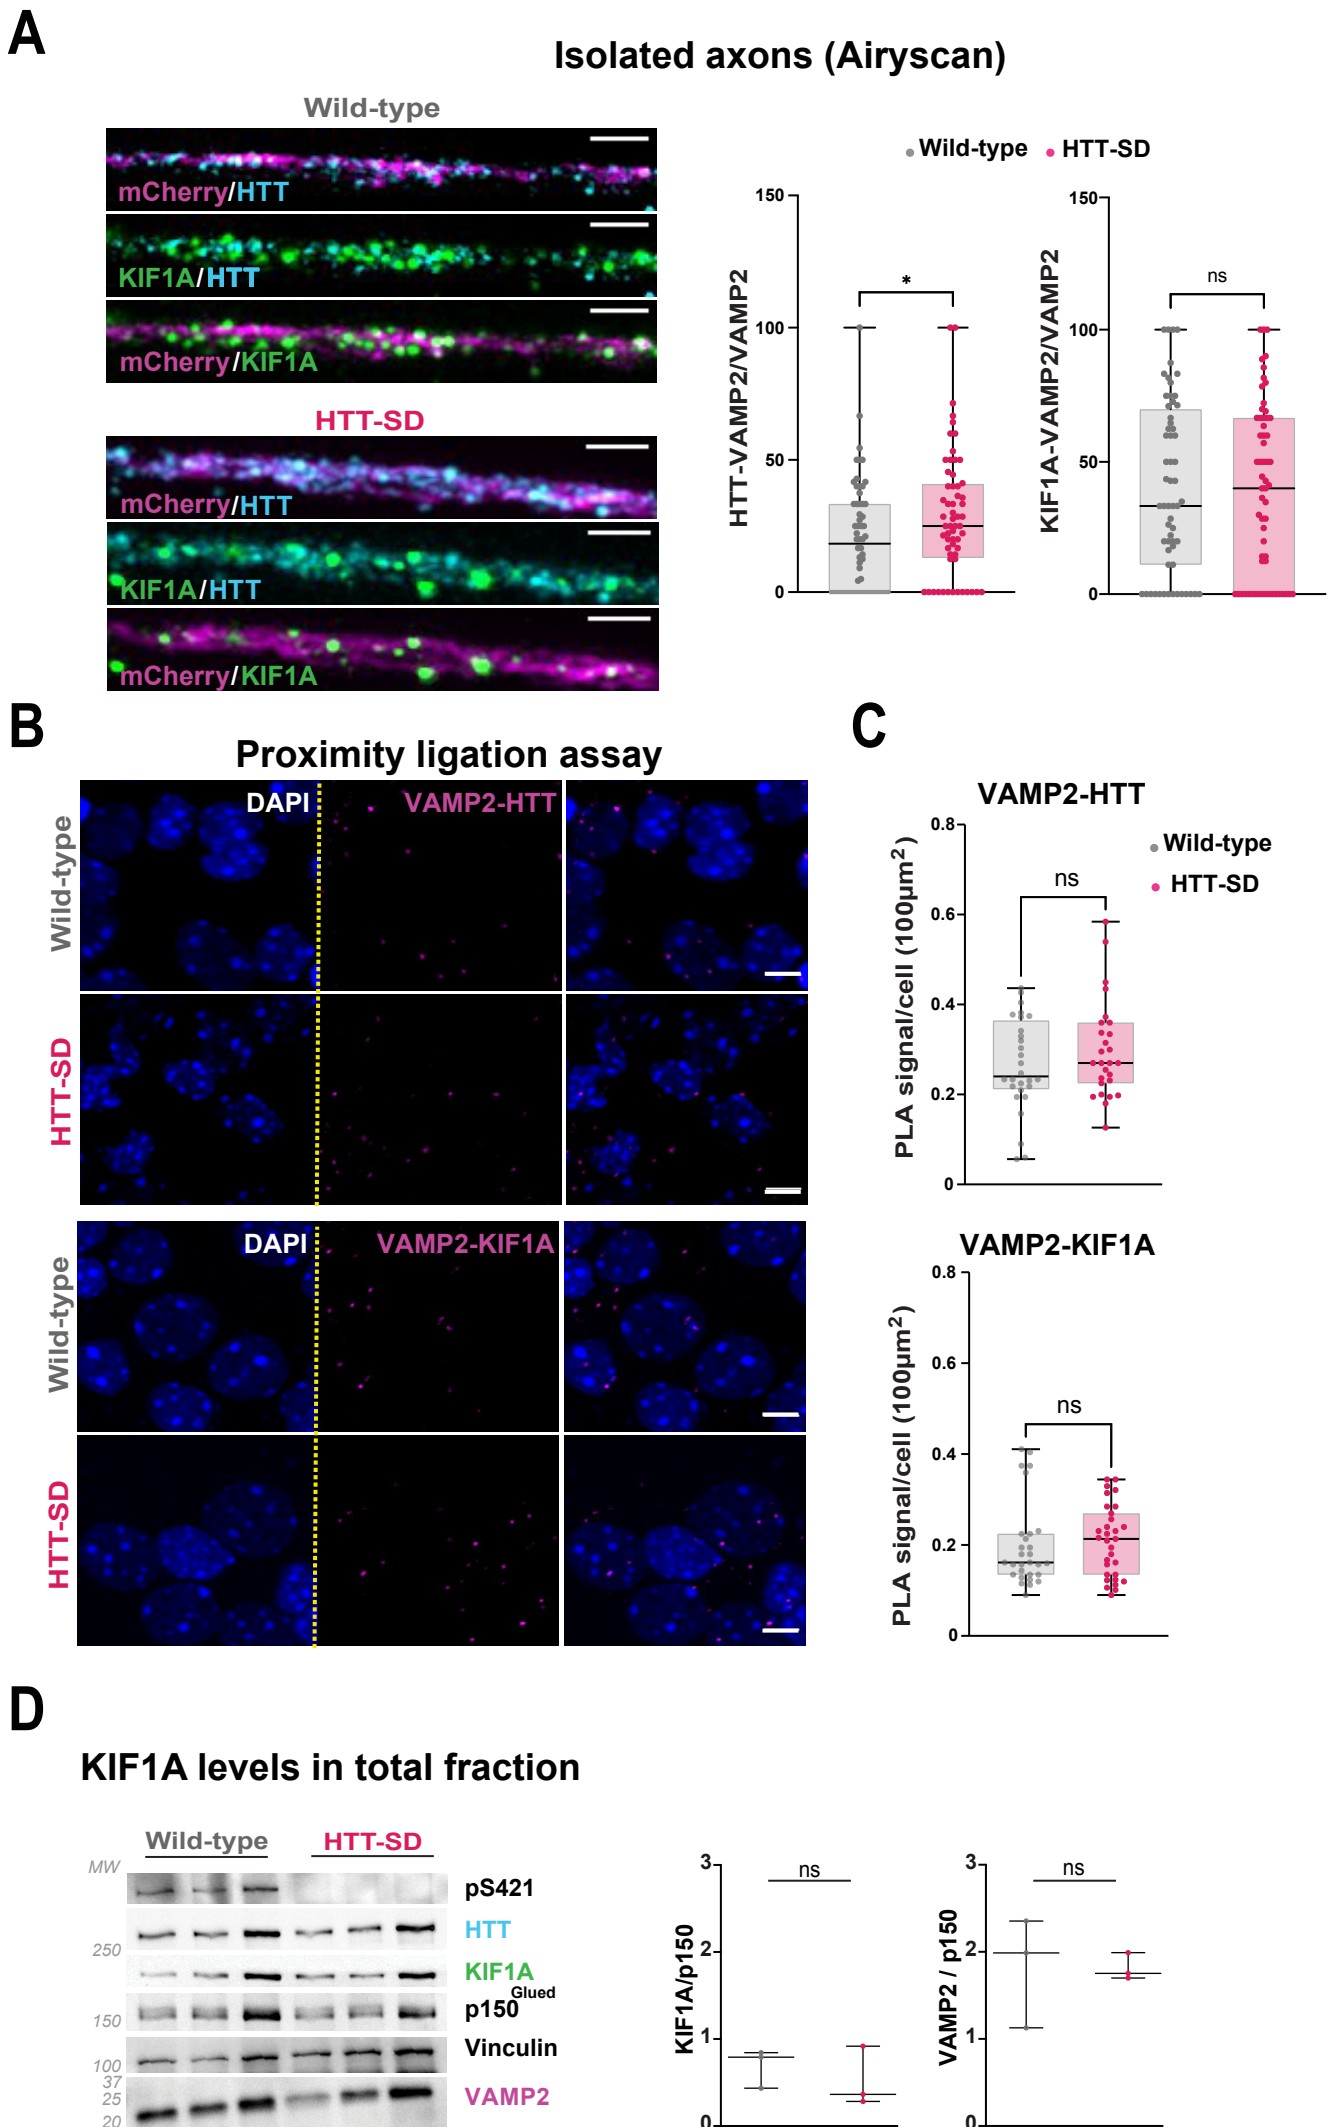

Supplement: supp [file elife-81011-supp-v1.zip]

Figure 5-source data 4

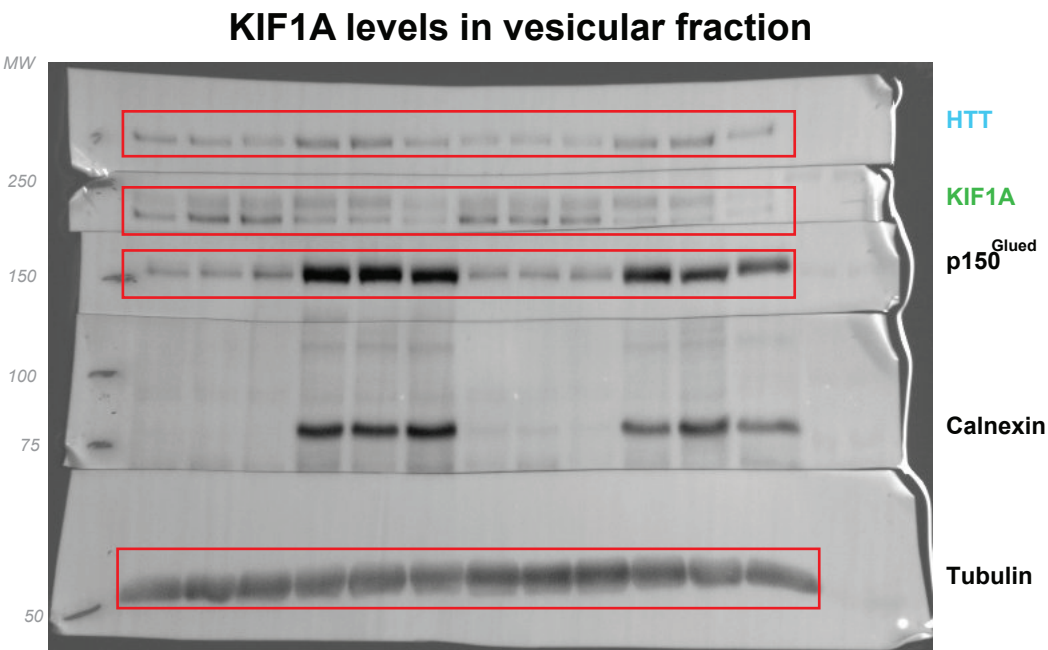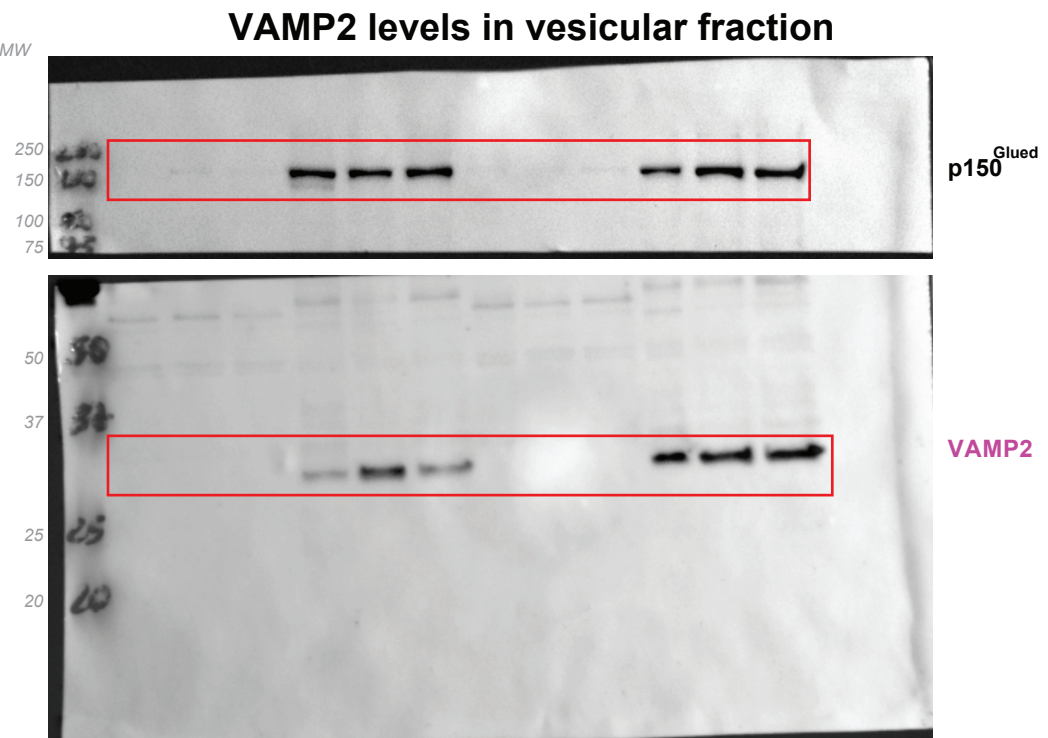

Supplement: supp [file elife-81011-supp-v1.zip]

Figure 4-figure supplement 1

**A**

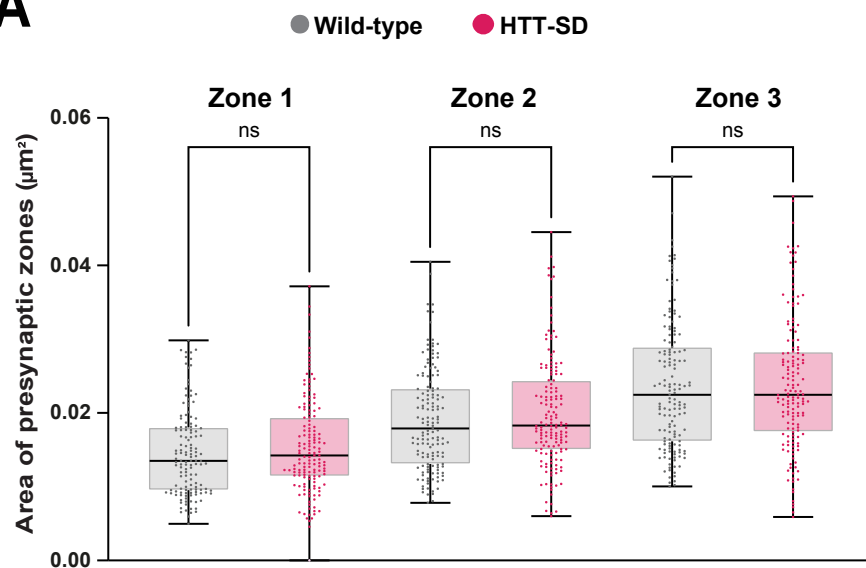

**B**

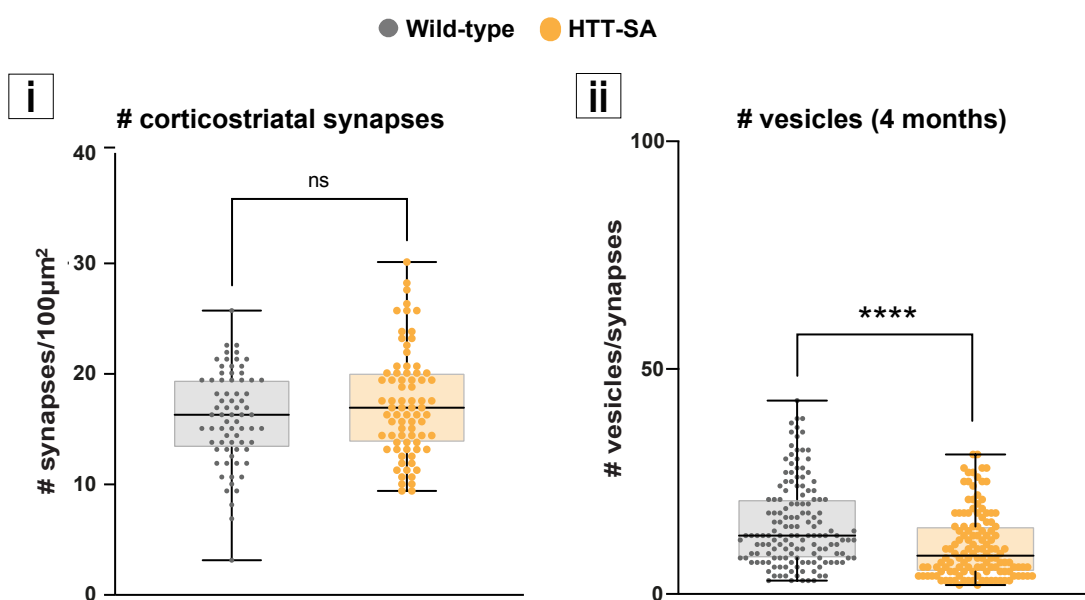

Supplement: supp [file elife-81011-supp-v1.zip]

Figure 6-Figure supplement 1-source data 1

**KIF1A levels in wild-type cortical neurons**

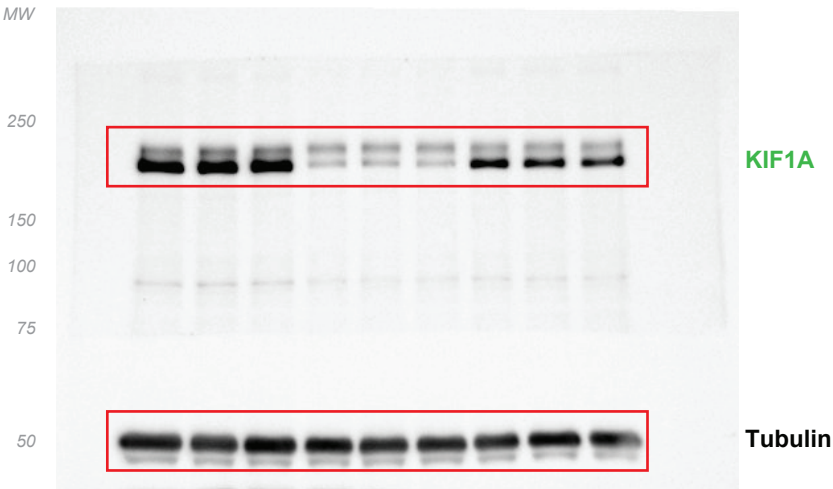

Supplement: supp [file elife-81011-supp-v1.zip]

Figure 3-figure supplement 1

**A**

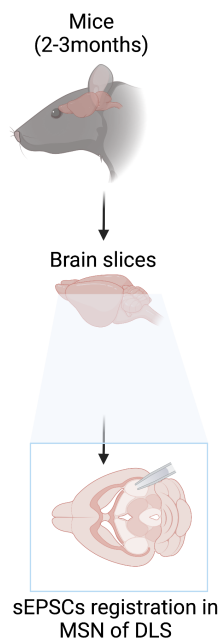

**B**

**mEPSC recordings**

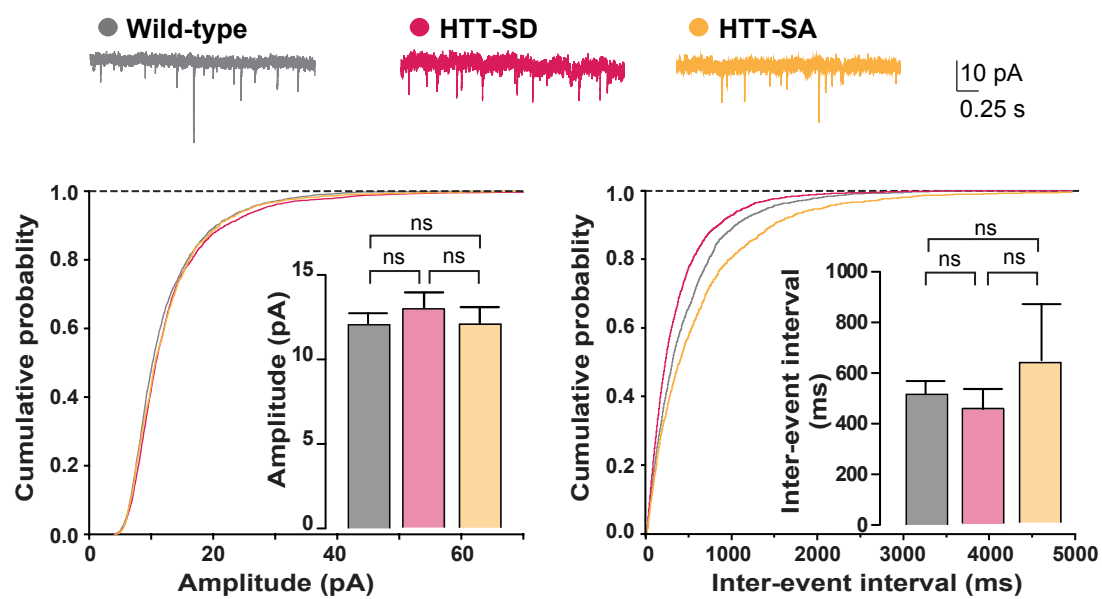

Supplement: supp [file elife-81011-supp-v1.zip]

Figure 5-Figure supplement 1-source data 6

KIF1A and VAMP2 levels in total fraction

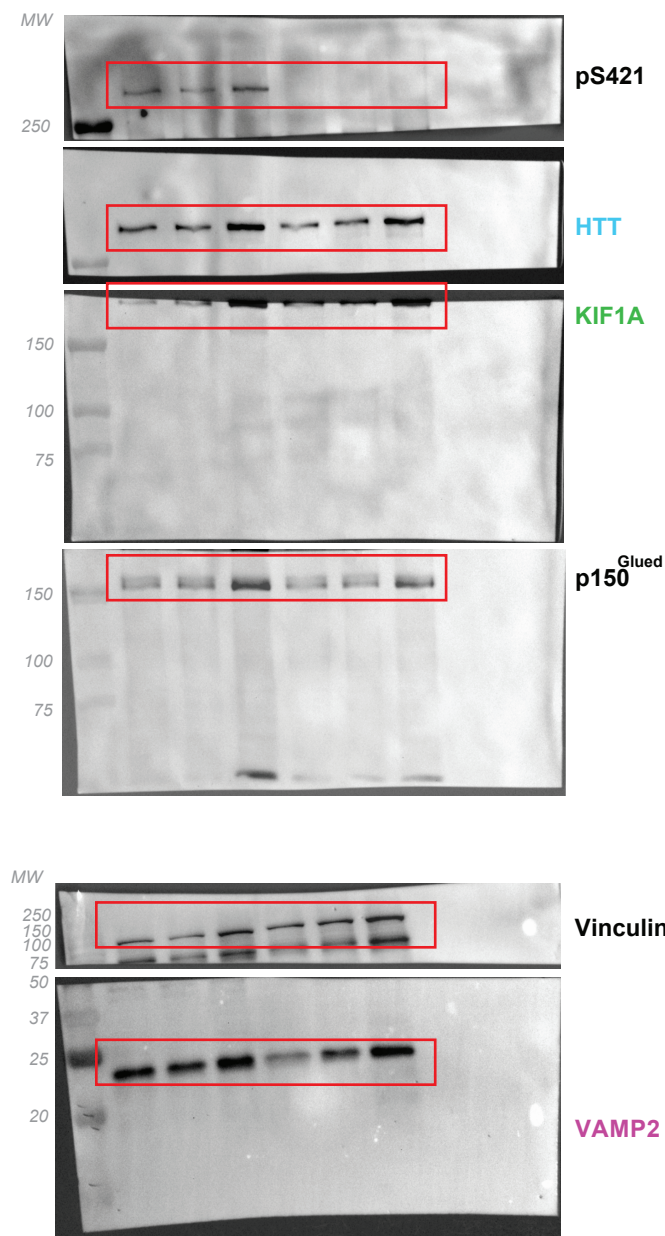

Supplement: supp [file elife-81011-supp-v1.zip]
